# Supplementary material for: Genome-wide association study and biological pathway analysis of the Eimeria maxima response in broilers
Source: PubMed Central journal article supplement (PMC4659166; doi:10.1186/s12711-015-0170-0), 2015-11-25

**Distribution of the most frequent significantly ( $p < 0.05$ ) associated biological pathways across all measured parameters**

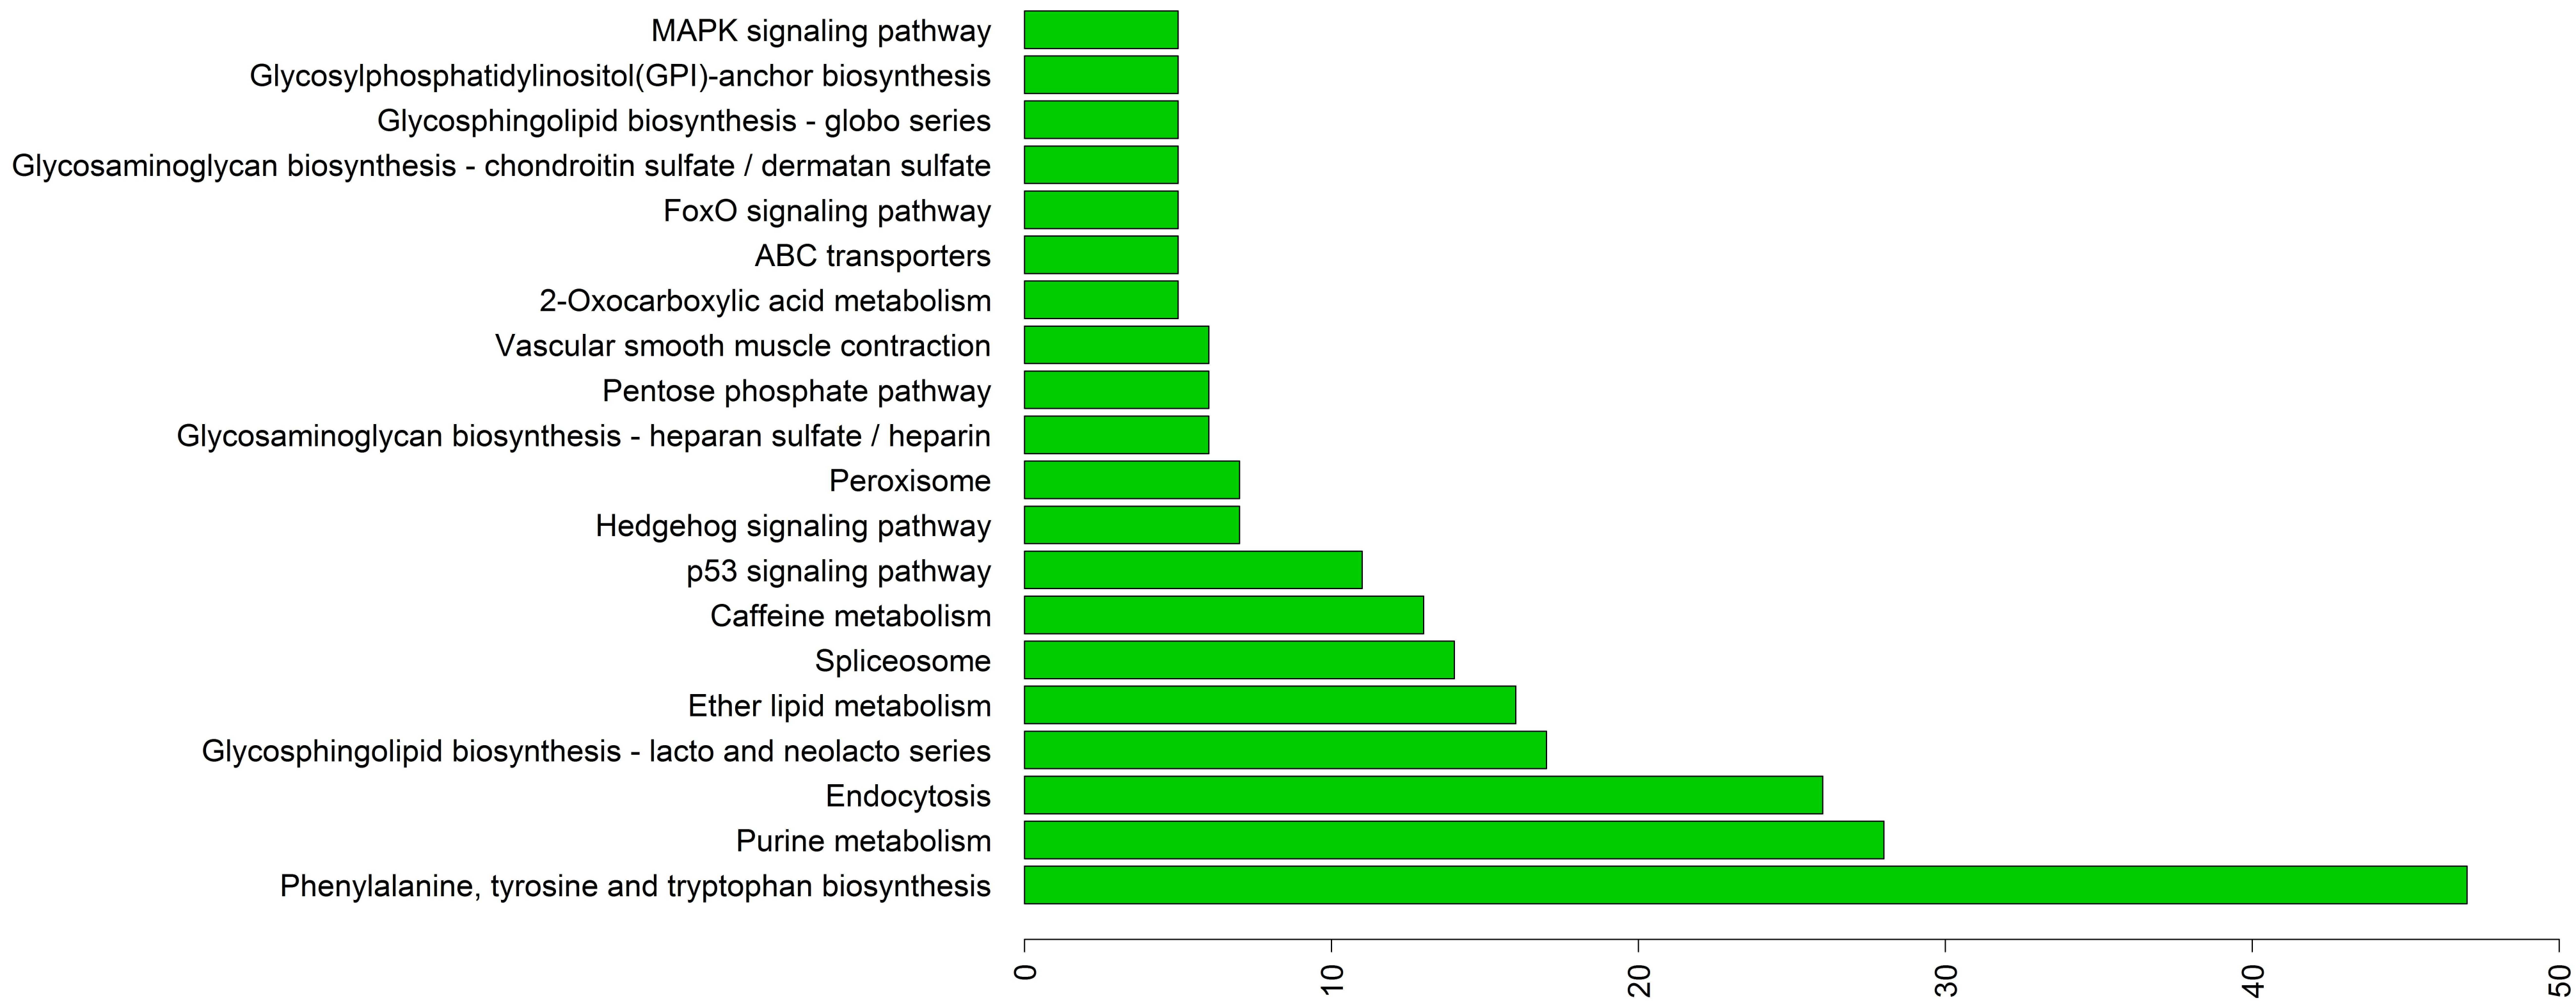

**Distribution of the most frequent significantly ( $p < 0.05$ ) associated biological pathways across all measured parameters excluding PC measurements**

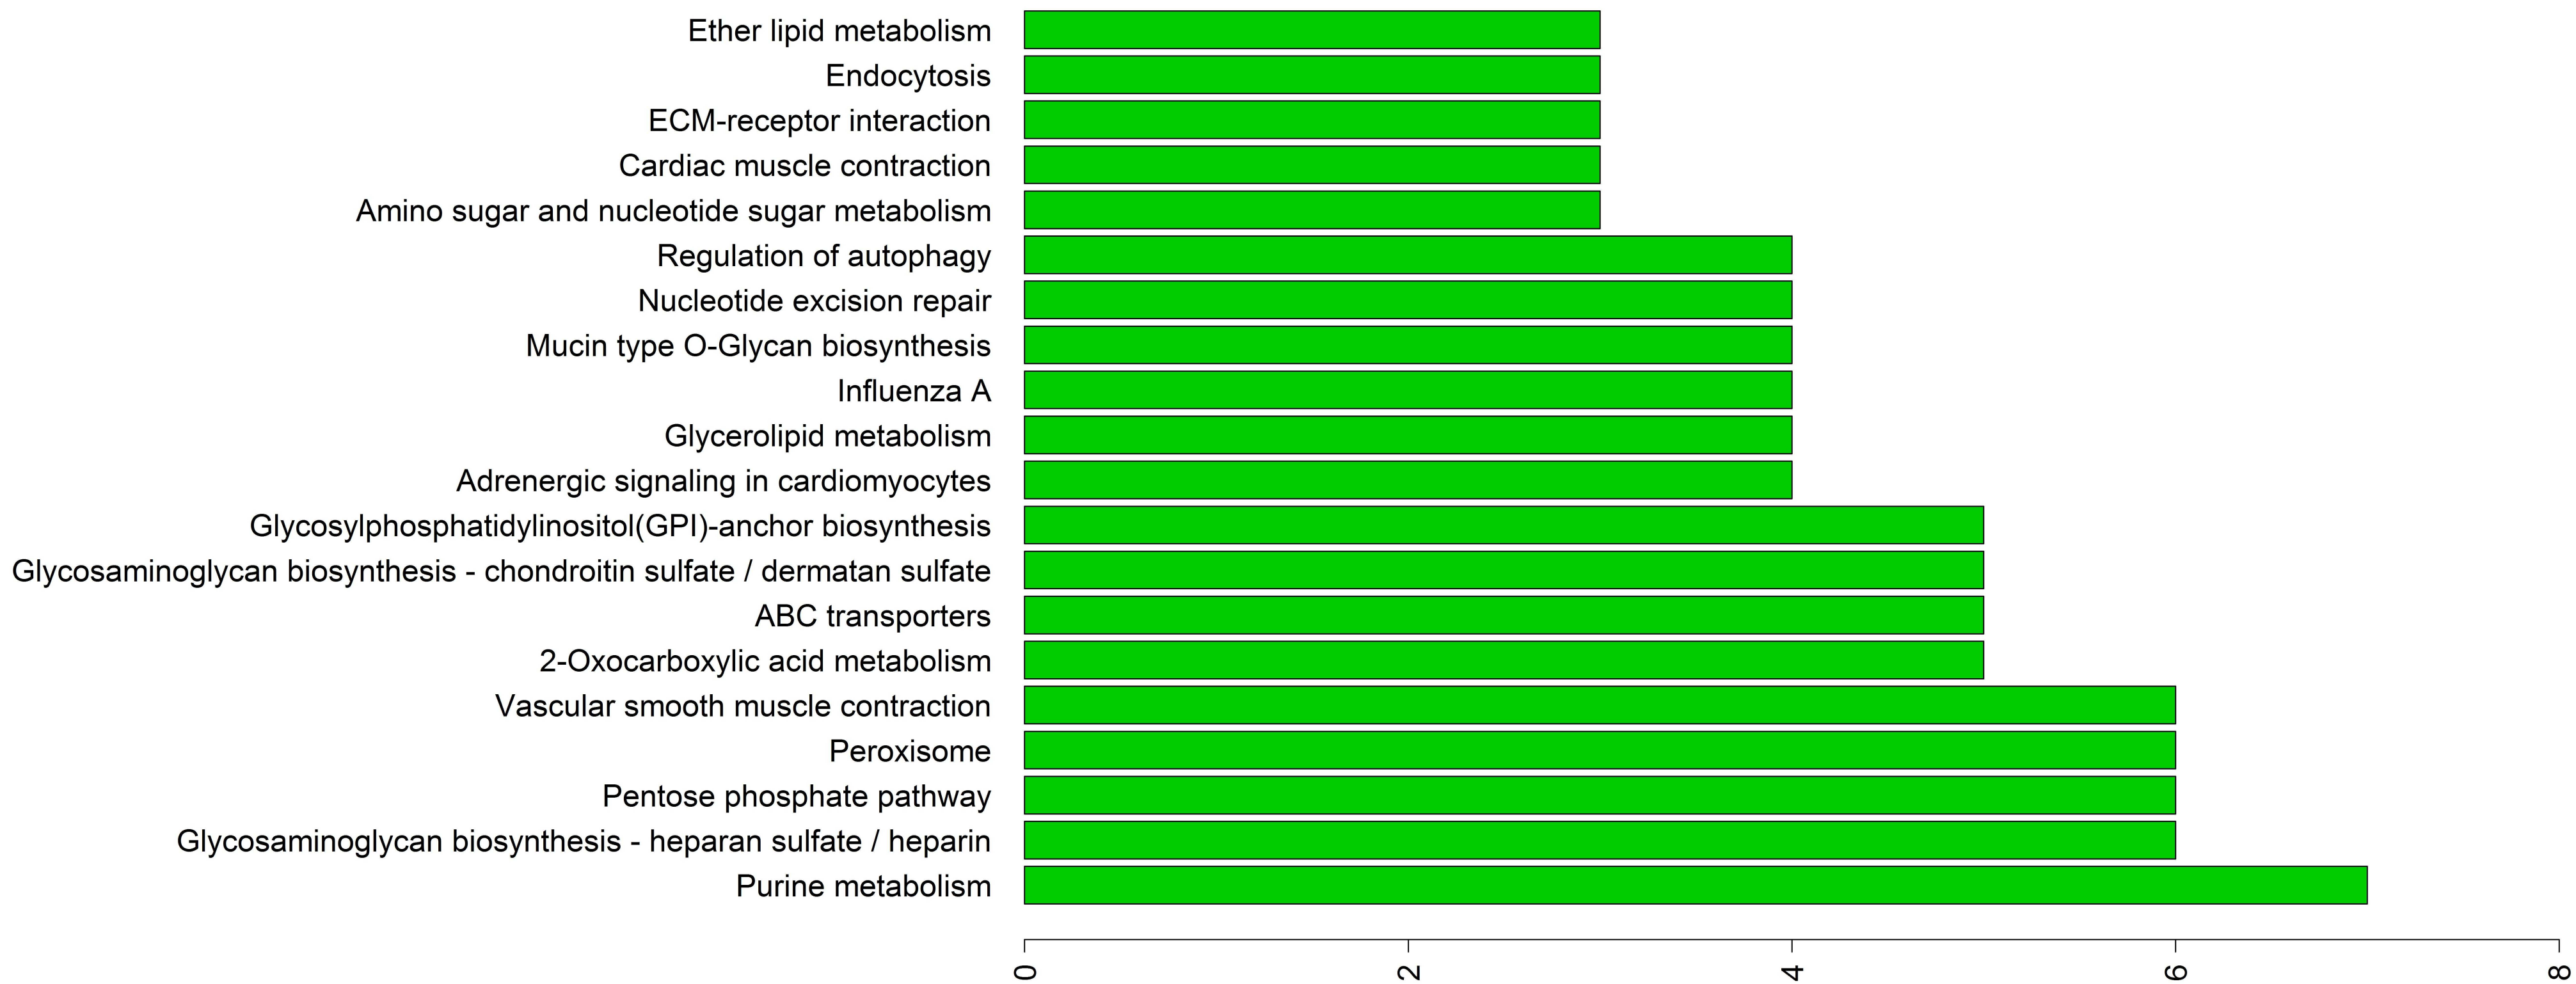

Supplement: 12711_2015_170_MOESM11_ESM.pdf [file 12711_2015_170_MOESM11_ESM.pdf]
