# Supplementary material for: Genome-wide association study and biological pathway analysis of the Eimeria maxima response in broilers
Source: Springer Nature journal article supplement (doi:10.1186/s12711-015-0170-0), 2015-11-25

# Beta-2 Globulin

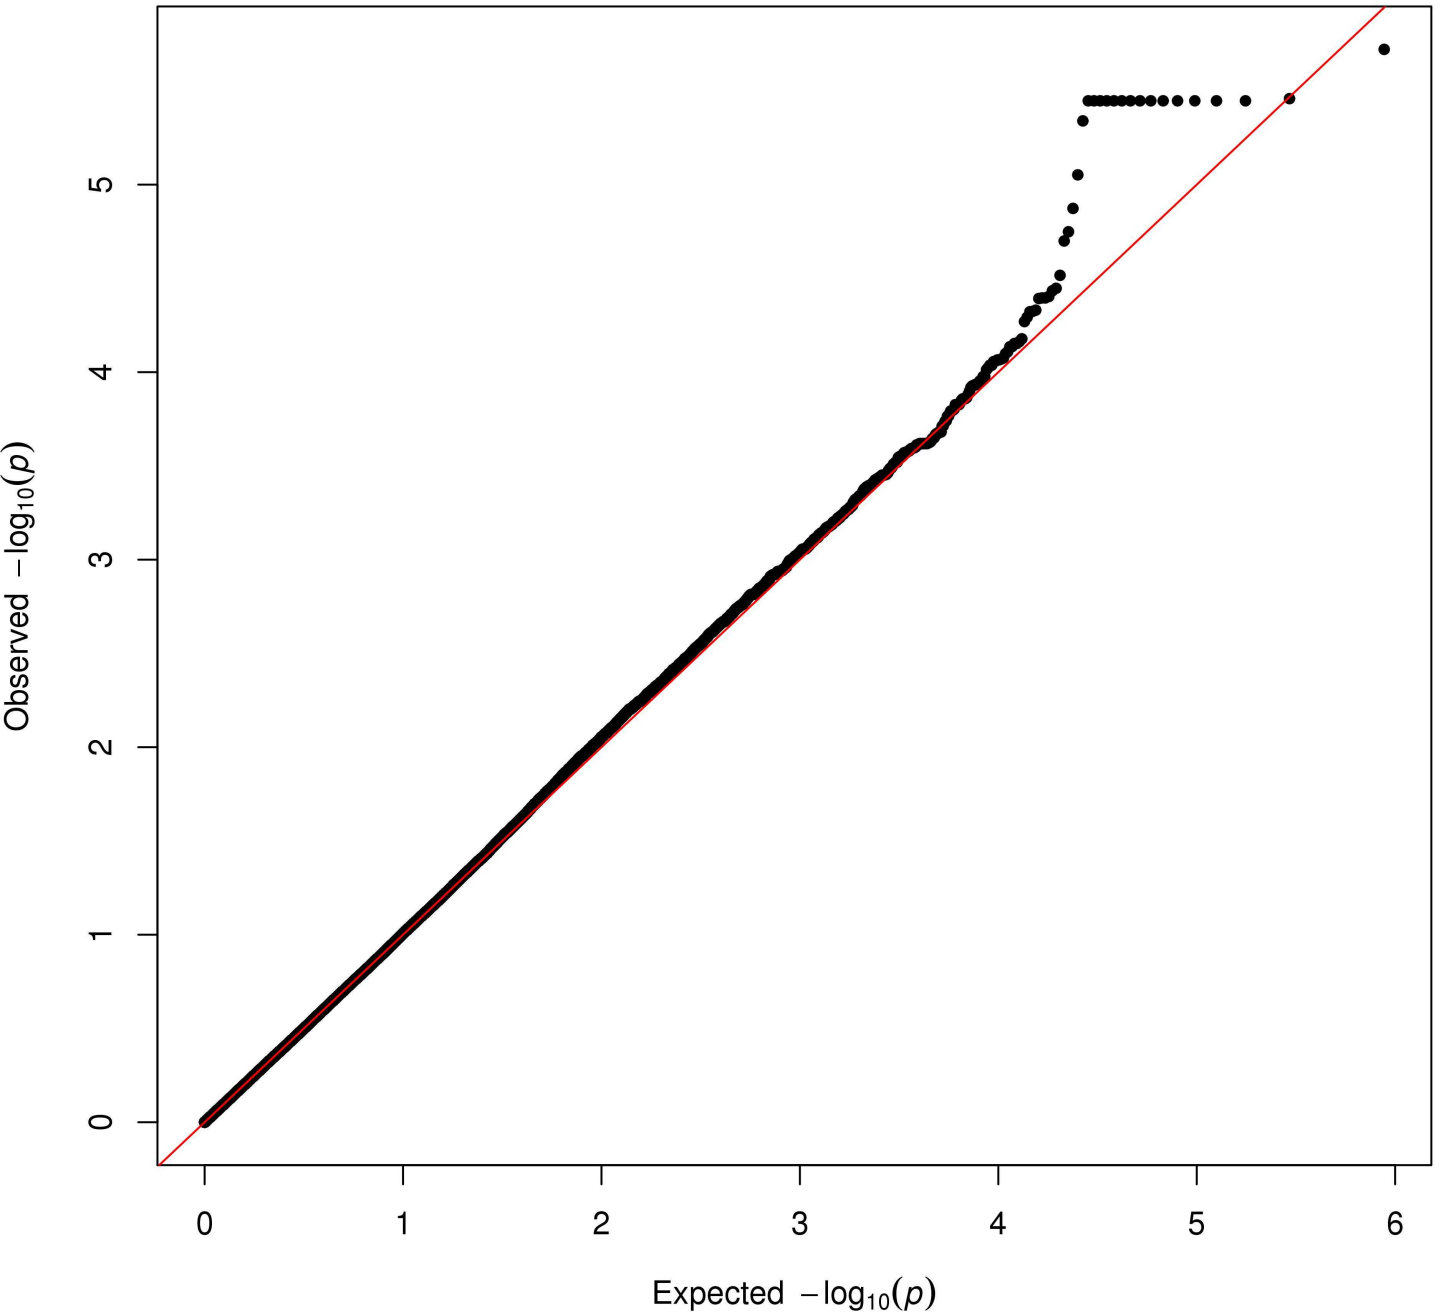

Supplement: MOESM9 [file 12711_2015_170_MOESM9_ESM.pdf]
