# Supplementary material for: Genome-wide association study and biological pathway analysis of the Eimeria maxima response in broilers
Source: Springer Nature journal article supplement (doi:10.1186/s12711-015-0170-0), 2015-11-25

Scale chr5: 28,950,000 | 100 kb | 29,000,000 | 29,050,000 | 29,100,000 | 29,150,000 |

Gap

Ensembl Gene Predictions - Ensembl 79  
GenScan Gene Predictions

chr5.848  
chr5.849  
chr5.850

Non-Chicken RefSeq Genes  
RefSeq Genes

Chicken ESTs Including Unspliced

Other RefSeq  
RefSeq Genes

BU214355  
BU205593  
BU474157  
BU122131  
BU210182  
DN855806  
BU287272  
BU292784  
BU286838  
BU377979  
BU407509  
CN384219  
DN854753  
BU296774  
BU377986  
DN851260  
CV041156  
CV854021  
BU274538  
BU389397  
BU225048  
BU367495  
BU285677  
BU409730  
BU293933  
BU222972

Other mRNAs

Chicken mRNAs from GenBank  
Non-Chicken mRNAs from GenBank

Spliced ESTs

Chicken ESTs That Have Been Spliced

Mouse (Dec. 2011 (GRCm38/mm10)) Chained Alignments

Mouse (Dec. 2011 (GRCm38/mm10)) Alignment Net

Common SNPs(138)

Simple Nucleotide Polymorphisms (dbSNP 138) Found in >= 1% of Samples

Repeating Elements by RepeatMasker

RepeatMasker

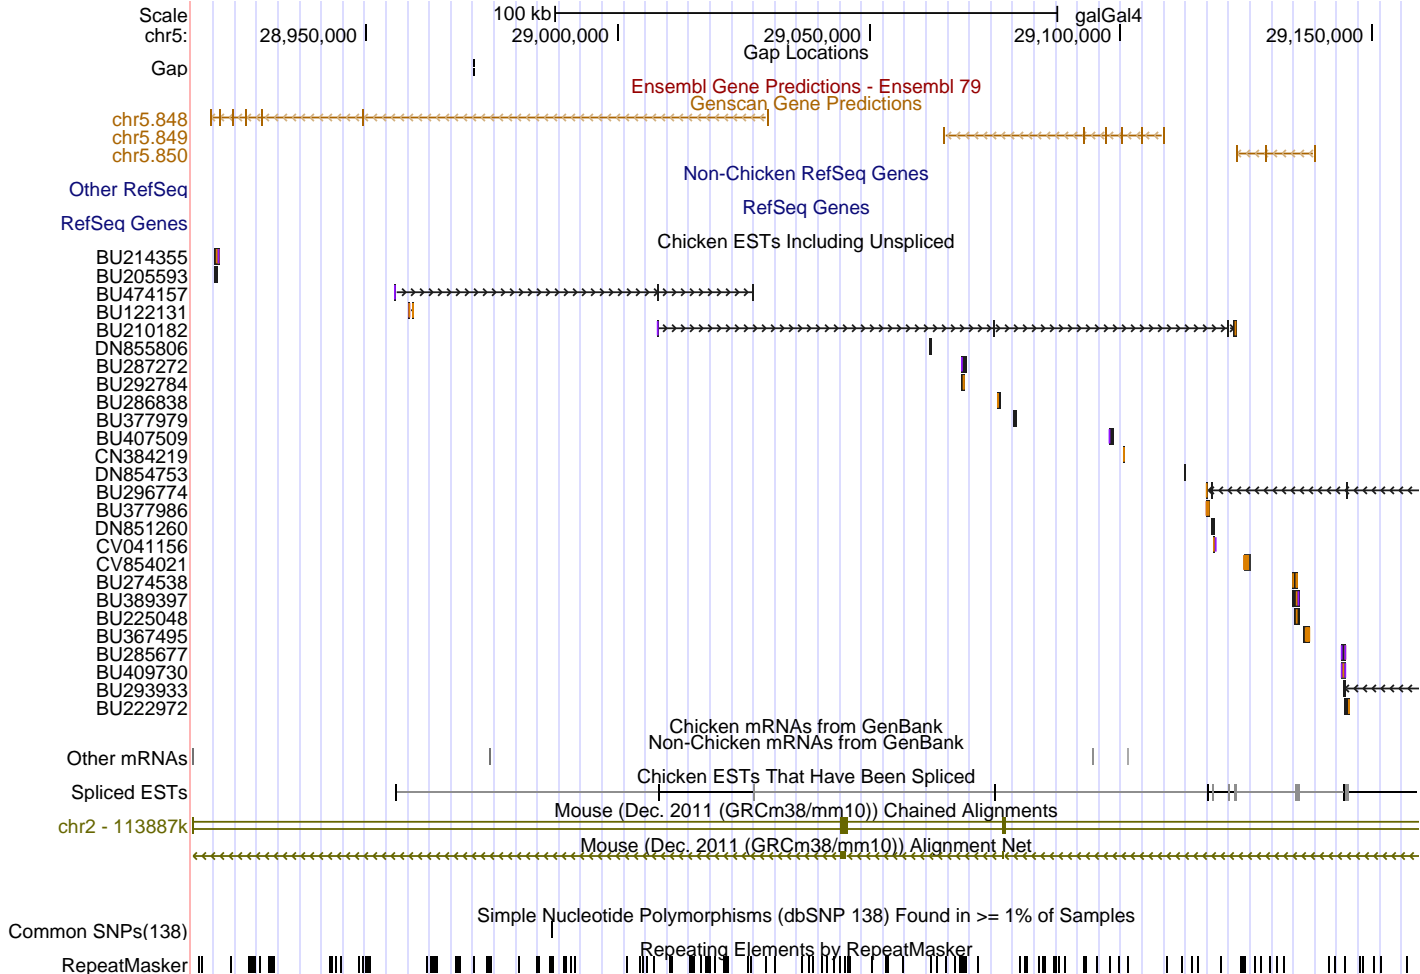

Supplement: MOESM12 [file 12711_2015_170_MOESM12_ESM.pdf]
