# Supplementary material for: Genome-wide association study and biological pathway analysis of the Eimeria maxima response in broilers
Source: Genet Sel Evol. 2015 Nov 25;47:91. doi: 10.1186/s12711-015-0170-0 (PMC4659166; doi:10.1186/s12711-015-0170-0)
Supplement: Supplementary file 1 — 10.1186/s12711-015-0170-0 Title: Quality control of genotype data. Description: The genotype data were obtained from 1972 animals that were alive at day 16 of the challenge study. Genotype data were produced using 580 K Affymetrix® Axiom® HD genotyping array. The call rate threshold was set at 98 %, and all SNPs and samples with values less than 98 % were excluded. The minor allele frequency threshold was set at 1 % and animals with values less than 1 % were excluded. Heterozygote excess was assessed based on the distribution of F-statistics adjusted for skewness using adjbox function from the R package robustbase. Control animals were also excluded from the analysis. A total of 138,568 SNPs out of 580,961 were removed during the quality control. [file 12711_2015_170_MOESM1_ESM.xlsx]

## Sheet: Additional file 1 Table S1
Quality Control Steps	Number of SNPs	Number of Animals	Number of removed SNPs	Number of removed animals
Raw data	580960	1972	0	0
Call rate	554268	1929	26693	43
Minor allele frequency (>1%)	505942	1929	48326	0
Affymetrix quality criteria	477512	1929	28430	0
Excess of heterozygotes	443588	1929	35119	0
Sex check	443588	1929 (1853M+76F)	0	0
Removing control animals	443588	1847	0	82
Sex check	443588	1847	0	73
