# Supplementary material for: Genome-wide association study and biological pathway analysis of the Eimeria maxima response in broilers
Source: Genet Sel Evol. 2015 Nov 25;47:91. doi: 10.1186/s12711-015-0170-0 (PMC4659166; doi:10.1186/s12711-015-0170-0)
Supplement: Supplementary file 3 — 10.1186/s12711-015-0170-0 Title: List of annotated SNPs used for Biological Pathway Analysis. Description: The table contains SNPs used in the genome-wide association study with p-values < 10−4 with the corresponding information on the genes in which they are located. Abbreviations used for column names: RS ID: Reference SNP ID number, SYMBOL: HGNC symbol for gene, NCBI GENE ID: NCBI gene ID, CHR: chromosome, CHR POS: chromosome position, GENE REGION: gene region of the corresponding gene, SS ID: submitted SNP ID, AFFYMETRIX: Affymetrix SNP ID, ALLELE: SNP alleles. The remaining columns are p-values for each trait with column names corresponding to trait abbreviations used in the manuscript. [file 12711_2015_170_MOESM3_ESM.xlsx]

## Sheet: Additional file 3 Table S3
RS ID	SYMBOL	NCBI GENE ID	CHR	CHR POS	GENE REGION	SS ID	AFFYMETRIX ID	ALLELE	PPP_albumin	PPP_alpha1globulin	PPP_alpha2globulin	PPP_alpha3globulin	PPP_beta1globulin	PPP_beta2globulin	BWG	MCHC	PPP_gamaglobulin	Erythrocytes	HEMA	Hemoglobine	LS_duodenum	LS_jejunum	Leukocytes	LymphocytesPercentage	LymphocyteNumber	HeterophilsNumber	HeterophilsPercentage	OC	Thrombocytes	PPP_prealbumin	PPP_ProteinContent	MCH	BT	MCV	PC_380	PC_385	PC_390	PC_395	PC_400	PC_405	PC_410	PC_415	PC_420	PC_425	PC_430	PC_435	PC_440	PC_445	PC_450
rs15995541	HCLS1	426867	1	75489	upstream-variant-2KB	ss537797928	AX-75532685	A/C	0.321103	0.192688	0.359549	0.8907	0.821545	0.92959	0.502778	0.272744	0.698632	0.180115	0.279781	0.300391	0.642962	0.95469	0.704557	0.0699427	0.332869	0.333385	0.070725	0.328383	0.373089	0.895785	0.732022	0.425852	0.160845	0.557016	0.15343	0.117439	0.128229	0.133353	0.0722389	0.0588191	0.0313669	0.0446052	0.0420336	0.104397	0.112694	0.0629535	0.0575532	0.0549197	0.0678814
rs15995539	HCLS1	426867	1	76566	upstream-variant-2KB	ss538289742	AX-75534944	A/G	0.397423	0.906257	0.196672	0.475552	0.512001	0.154931	0.105596	0.583716	0.52854	0.511953	0.0159758	0.73376	0.659659	0.84788	0.510223	0.742724	0.526514	0.613981	0.740105	0.864601	0.24752	0.630424	0.990956	0.143012	0.738004	0.392391	0.441243	0.465123	0.442027	0.309119	0.157053	0.165792	0.0999373	0.121807	0.101962	0.192178	0.236154	0.222489	0.204387	0.235685	0.255959
rs317964541	HCLS1	426867	1	80646	reference,synonymous-codon	ss538045863	AX-75543559	C/T	0.814594	0.984228	0.642613	0.542112	0.299178	0.198417	0.851185	0.660061	0.288967	0.565134	0.37722	0.314149	0.704089	0.765354	0.467805	0.633737	0.304492	0.643235	0.631384	0.435376	0.556704	0.65204	0.748671	0.919189	0.261332	0.996757	0.760947	0.552901	0.587017	0.733515	0.934345	0.926341	0.997516	0.956282	0.889054	0.970333	0.979961	0.847932	0.875972	0.883903	0.918938
rs315847242	HCLS1	426867	1	82768	intron-variant	ss538060772	AX-75548194	A/G	0.753988	0.314014	0.373836	0.563212	0.713349	0.751827	0.442319	0.647688	0.759274	0.838511	0.0131246	0.733512	0.81882	0.987235	0.762546	0.497009	0.666206	0.362743	0.500475	0.529218	0.824662	0.710442	0.709504	0.97206	0.466639	0.675701	0.194252	0.139544	0.15459	0.185093	0.157922	0.143633	0.10447	0.135414	0.119565	0.210453	0.261863	0.132541	0.117792	0.119907	0.104012
rs317957435	HCLS1	426867	1	84571	intron-variant	ss537929840	AX-75551865	G/T	0.309342	0.444646	0.322498	0.0549559	0.656829	0.000572964	0.172933	0.924802	0.355445	0.114289	0.481268	0.247775	0.906583	0.67705	0.530242	0.225704	0.270308	0.970044	0.223748	0.839617	0.616196	0.980672	0.0435011	0.769903	0.141232	0.737559	0.536529	0.633844	0.606845	0.713449	0.5827	0.421561	0.417695	0.457408	0.439953	0.463455	0.571519	0.632555	0.571052	0.557983	0.607743
rs312477355	HCLS1	426867	1	88215	utr-variant-3-prime	ss538165887	AX-81000674	C/G	0.680102	0.680087	0.92252	0.179836	0.361964	0.361803	0.964483	0.809455	0.482063	0.436657	0.117485	0.685255	0.533417	0.95175	0.676993	0.444308	0.773102	0.942818	0.449284	0.971647	0.805863	0.319322	0.226879	0.744562	0.7316	0.325146	0.492913	0.418419	0.452116	0.482067	0.493136	0.513379	0.498114	0.36689	0.385828	0.475476	0.509738	0.384895	0.373369	0.357599	0.319564
rs313945394	HCLS1	426867	1	89045	intron-variant	ss537918324	AX-80878265	C/G	0.42667	0.965433	0.311875	0.460883	0.575907	0.459212	0.616375	0.6384	0.912102	0.113291	0.767168	0.130884	0.902834	0.670687	0.850735	0.929156	0.331871	0.761767	0.926926	0.517153	0.0380042	0.511136	0.948667	0.341269	0.505391	0.110049	0.434053	0.312481	0.341486	0.513084	0.795044	0.738219	0.732814	0.718903	0.851371	0.788849	0.82365	0.642538	0.684284	0.665044	0.559182
rs315996196	RABL2B	426865	1	104423	upstream-variant-2KB	ss538283643	AX-80822728	C/G	0.300082	0.575499	0.312955	0.364739	0.274068	0.85499	0.674948	0.557194	0.780003	0.896193	0.413941	0.934298	0.369055	0.966022	0.490104	0.234549	0.457309	0.834312	0.235519	0.304817	0.164123	0.404208	0.643763	0.205695	0.526832	0.851419	0.953801	0.990697	0.930697	0.921886	0.703819	0.671817	0.570315	0.716058	0.704715	0.758282	0.818588	0.945227	0.948149	0.974163	0.895416
rs317173871	RABL2B	426865	1	108221	intron-variant	ss538265766	AX-80813207	C/G	0.752299	0.250292	0.785661	0.0413924	0.992901	0.358034	0.667482	0.24184	0.989314	0.441798	0.135291	0.285053	0.779269	0.396013	0.327085	0.773061	0.290318	0.139251	0.775429	0.803889	0.701558	0.111089	0.908229	0.718065	0.167196	0.0656964	0.420191	0.371678	0.411212	0.476743	0.416205	0.504715	0.501073	0.569116	0.64522	0.645547	0.844305	0.620967	0.555326	0.558892	0.521065
rs15995431	RABL2B	426865	1	109819	intron-variant	ss537739681	AX-75224627	C/T	0.881773	0.707159	0.816326	0.644715	0.19606	0.388237	0.862876	0.713106	0.874317	0.624625	0.00784497	0.752219	0.608505	0.688493	0.603422	0.364268	0.401231	0.821282	0.361682	0.206112	0.055374	0.350743	0.969049	0.0135086	0.360197	0.0100307	0.762363	0.994269	0.993161	0.959923	0.879265	0.925339	0.749337	0.781763	0.955724	0.912753	0.979677	0.943903	0.959209	0.911661	0.827067
rs14688651	MIR1604	100315910	1	314376	upstream-variant-2KB	ss537868602	AX-75427627	A/G	0.559768	0.600168	0.99123	0.736116	0.0947379	0.493369	0.272114	0.91065	0.327237	0.339622	0.554209	0.10204	0.0379954	0.340313	0.726313	0.453441	0.438702	0.941171	0.454942	0.832351	0.323526	0.589462	0.0862017	0.124245	0.312713	0.0334203	0.697318	0.570719	0.541575	0.513099	0.505187	0.420362	0.418543	0.474615	0.508426	0.564805	0.714059	0.739239	0.873734	0.912771	0.822228
rs316448679	ZC3HC1	416679	1	853896	intron-variant	ss537723299	AX-75539203	C/T	0.863878	0.594654	0.566383	0.679567	0.570612	0.471794	0.687613	0.954075	0.884416	0.128169	0.331678	0.0820435	0.746302	0.80631	0.280568	0.564407	0.43449	0.657169	0.561377	0.30553	0.987204	0.276935	0.252239	0.869001	0.282045	0.601359	0.686626	0.609131	0.603928	0.510779	0.415931	0.452315	0.370018	0.268232	0.299023	0.350869	0.304843	0.349902	0.338162	0.328219	0.316754
rs15742924	ZC3HC1	416679	1	855663	intron-variant	ss538240152	AX-75539605	C/T	0.578693	0.856006	0.519567	0.487752	0.560813	0.743131	0.482255	0.0537797	0.925577	0.792779	0.734001	0.563518	0.805427	0.957299	0.863495	0.301141	0.859294	0.427186	0.301212	0.700871	0.962567	0.872283	0.458991	0.212626	0.360565	0.249163	0.655626	0.700035	0.698098	0.7977	0.75392	0.504931	0.568811	0.666081	0.655584	0.706653	0.749334	0.701657	0.733953	0.765009	0.811932
rs316943858	ZC3HC1	416679	1	858014	intron-variant	ss538043386	AX-75540106	C/T	0.369975	0.106444	0.061713	0.941347	0.264299	0.407672	0.782227	0.319877	0.190333	0.519742	0.0587532	0.30582	0.649783	0.736935	0.674071	0.299488	0.828257	0.444834	0.305039	0.447702	0.853832	0.837647	0.130446	0.082866	0.622588	0.338548	0.240499	0.293898	0.296893	0.291681	0.475406	0.361146	0.302865	0.413212	0.395677	0.384712	0.26761	0.25369	0.253061	0.25471	0.411241
rs315548180	ZC3HC1	416679	1	859732	upstream-variant-2KB	ss537720427	AX-75540504	A/G	0.540129	0.164133	0.815409	0.396392	0.721177	0.284316	0.779802	0.702473	0.461098	0.474557	0.299053	0.173438	0.0337986	0.138054	0.316855	0.6047	0.731497	0.291768	0.60124	0.485752	0.384108	0.569895	0.0212246	0.115338	0.263888	0.0526038	0.250444	0.307073	0.296873	0.17953	0.13123	0.172282	0.13525	0.187122	0.126563	0.110071	0.109308	0.16233	0.178265	0.178697	0.244274
rs314001057	CPA5	416683	1	913033	intron-variant	ss537857575	AX-75551735	A/G	0.346268	0.966479	0.905694	0.302285	0.89622	0.147301	0.710969	0.521548	0.427963	0.746159	0.851662	0.902893	0.408625	0.544624	0.306572	0.147151	0.132828	0.984513	0.14575	0.49845	0.671834	0.999403	0.245105	0.387432	0.445599	0.757742	0.641291	0.493142	0.482502	0.364212	0.404237	0.425947	0.514477	0.33068	0.479897	0.581298	0.521789	0.578334	0.68619	0.743662	0.571825
rs313420648	CPA5	416683	1	913194	intron-variant	ss537941656	AX-75551768	A/C	0.506538	0.684705	0.0962775	0.532239	0.213523	0.707282	0.859306	0.678991	0.230344	0.525309	0.434389	0.373435	0.688284	0.671572	0.912276	0.243621	0.385634	0.247866	0.243544	0.594611	0.438951	0.347772	0.364627	0.148304	0.732179	0.300542	0.490015	0.403337	0.402991	0.322978	0.387108	0.556669	0.571717	0.599544	0.348752	0.482267	0.225631	0.303363	0.327555	0.375075	0.497182
rs314777584	CPA1	395276	1	920304	downstream-variant-500B	ss537889144	AX-75553205	C/T	0.258609	0.33478	0.415624	0.408772	0.26188	0.309908	0.616753	0.4751	0.983082	0.86583	0.128532	0.807291	0.779482	0.848247	0.700453	0.27811	0.343626	0.841331	0.278121	0.651194	0.898814	0.62822	0.772633	0.627733	0.611888	0.267911	0.398624	0.418401	0.447188	0.50876	0.459879	0.372715	0.549437	0.668123	0.478417	0.935443	0.703175	0.609963	0.605388	0.632704	0.720569
rs316525288	CEP41	416684	1	922234	intron-variant	ss538282344	AX-75553564	G/T	0.312587	0.485265	0.0308532	0.338704	0.264311	0.0425274	0.351673	0.757512	0.966089	0.883332	0.49164	0.495885	0.555257	0.677109	0.384439	0.540671	0.296122	0.961841	0.543332	0.385929	0.647372	0.162804	0.462886	0.0438625	0.323695	0.0479333	0.51697	0.53038	0.47838	0.281758	0.178678	0.221453	0.141593	0.0946331	0.157553	0.0903816	0.0769803	0.115607	0.142611	0.163575	0.235022
rs317475673	CEP41	416684	1	924945	intron-variant	ss537902177	AX-75554048	C/T	0.391839	0.727241	0.447021	0.0399158	0.988017	0.0148807	0.381197	0.715429	0.286582	0.0901517	0.604554	0.145574	0.39454	0.845597	0.85249	0.236341	0.654145	0.236533	0.237284	0.28255	0.0850999	0.364863	0.027265	0.65576	0.411704	0.399546	0.712259	0.65884	0.6758	0.80632	0.663861	0.681644	0.624827	0.905512	0.520158	0.61541	0.560507	0.562983	0.509112	0.520496	0.845097
rs13778618	CEP41	416684	1	925289	reference,synonymous-codon	ss538022536	AX-75554116	C/T	0.0381553	0.351936	0.493745	0.0065808	0.122006	0.00716236	0.233908	0.620223	0.45766	0.689606	0.067158	0.630474	0.370192	0.648791	0.38283	0.946641	0.555331	0.245588	0.943306	0.105392	0.891331	0.965595	0.387246	0.85394	0.640534	0.391481	0.85144	0.867241	0.812204	0.656546	0.550876	0.597509	0.631813	0.563512	0.671301	0.614237	0.745187	0.92198	0.98637	0.93197	0.946213
rs312714323	CEP41	416684	1	926500	intron-variant	ss537782758	AX-75554359	A/G	0.142634	0.862731	0.162745	0.123179	0.326668	0.559842	0.155171	0.99007	0.89884	0.950181	0.453931	0.676381	0.514707	0.379641	0.762598	0.0430927	0.179284	0.487919	0.0437611	0.678616	0.338376	0.665559	0.91401	0.231461	0.222013	0.0915146	0.502875	0.425132	0.389383	0.132266	0.0838462	0.153193	0.131136	0.123893	0.131806	0.286544	0.244474	0.322925	0.379954	0.442776	0.570439
rs14080512	CEP41	416684	1	927925	intron-variant	ss538198655	AX-80801345	C/G	0.0683519	0.68574	0.736944	0.150839	0.499854	0.0190466	0.813871	0.0904983	0.48126	0.17827	0.129185	0.0497217	0.68956	0.562198	0.124897	0.991151	0.147937	0.103807	0.993072	0.16953	0.419864	0.383686	0.604286	0.102684	0.615277	0.804351	0.993596	0.839745	0.827026	0.428264	0.43209	0.475169	0.465361	0.282143	0.501348	0.614015	0.872327	0.872269	0.968832	0.966216	0.678911
rs15013103	FBXO18	416687	1	978128	intron-variant	ss537914044	AX-75565403	A/G	0.00983362	0.0359326	0.343711	0.0801064	0.0416909	0.139612	0.364689	0.760341	0.47333	0.807798	0.188319	0.818871	0.190426	0.512646	0.128955	0.683334	0.165658	0.0969972	0.683414	0.284598	0.297646	0.562704	0.193436	0.717705	0.470978	0.899494	0.957499	0.860726	0.886409	0.595516	0.522227	0.814677	0.698011	0.629249	0.708201	0.864908	0.790787	0.810995	0.838746	0.846842	0.779602
rs312367126	FBXO18	416687	1	980534	reference,synonymous-codon	ss538146777	AX-75565978	A/G	0.114319	0.314096	0.258246	0.134344	0.522934	0.26986	0.44506	0.461436	0.665757	0.96269	0.700655	0.870041	0.640481	0.542513	0.589059	0.598157	0.836526	0.269647	0.600796	0.448128	0.692459	0.621486	0.978966	0.602275	0.706848	0.803538	0.694785	0.67832	0.694245	0.903949	0.779455	0.989278	0.952414	0.850797	0.89495	0.931655	0.765463	0.675162	0.658717	0.653773	0.856315
rs313604360	FBXO18	416687	1	982374	intron-variant	ss538084733	AX-75566422	A/G	0.0039938	0.109307	0.195207	0.020076	0.15721	0.0260296	0.408654	0.87581	0.959416	0.251987	0.618475	0.323493	0.18317	0.26611	0.601854	0.892654	0.780232	0.474269	0.890052	0.456744	0.286109	0.401468	0.145812	0.639337	0.658693	0.644706	0.655416	0.659933	0.68811	0.32314	0.306374	0.451455	0.459393	0.433126	0.36014	0.509285	0.472201	0.573219	0.589794	0.622851	0.52558
rs13778658	FBXO18	416687	1	986496	intron-variant	ss537997938	AX-75567464	A/G	0.0127032	0.0167752	0.397367	0.0838802	0.507342	0.00538416	0.383899	0.341496	0.376057	0.346557	0.859508	0.14621	0.939664	0.419287	0.597276	0.620852	0.579807	0.418473	0.620914	0.279652	0.624823	0.826718	0.466797	0.0423472	0.109533	0.499883	0.902023	0.833198	0.83159	0.496968	0.496488	0.482509	0.42093	0.298024	0.443076	0.538896	0.868332	0.814652	0.913802	0.949765	0.64527
rs314315563	FBXO18	416687	1	988397	intron-variant	ss537794922	AX-75567879	C/T	0.0123877	0.107858	0.500432	0.21858	0.0800111	0.144009	0.374572	0.418173	0.656682	0.577631	0.941573	0.523974	0.391165	0.489189	0.0573178	0.0569657	0.00894103	0.254393	0.0569734	0.0728917	0.367038	0.526164	0.518469	0.704378	0.339789	0.331668	0.493616	0.471601	0.459192	0.372611	0.185979	0.307372	0.167719	0.133434	0.302231	0.243188	0.393784	0.438493	0.482389	0.470305	0.401436
rs317753802	FBXO18	416687	1	989431	intron-variant	ss537807667	AX-75184779	C/T	0.0269367	0.130351	0.913244	0.18458	0.349562	0.0373368	0.538607	0.215078	0.869627	0.359139	0.260955	0.121012	0.500159	0.882078	0.236527	0.850255	0.157421	0.158937	0.850255	0.172317	0.835878	0.530196	0.942252	0.0219445	0.295554	0.428916	0.384265	0.288361	0.266974	0.133673	0.121372	0.169381	0.0975082	0.0454789	0.157998	0.109839	0.210519	0.220093	0.274348	0.289869	0.173451
rs317475104	FBXO18	416687	1	991012	intron-variant	ss537932633	AX-75186550	C/T	0.00404013	0.0061582	0.883421	0.0323774	0.194733	0.0335664	0.43249	0.613444	0.994251	0.287592	0.751353	0.228758	0.717046	0.923536	0.209256	0.153123	0.0609068	0.612913	0.153122	0.206842	0.285689	0.645784	0.357239	0.306196	0.219092	0.90399	0.652434	0.618415	0.631898	0.541329	0.361527	0.548843	0.438714	0.386901	0.623188	0.646138	0.881341	0.896312	0.979497	0.994235	0.891431
rs313211263	FBXO18	416687	1	993672	upstream-variant-2KB	ss537975750	AX-80950969	A/T	0.0165717	0.361388	0.117647	0.0206041	0.165493	0.082659	0.485607	0.252384	0.708355	0.100384	0.85808	0.246247	0.685889	0.7302	0.785487	0.829491	0.717521	0.714852	0.827507	0.439187	0.129503	0.95628	0.0541657	0.0402309	0.428453	0.554249	0.156057	0.181682	0.165013	0.111594	0.114225	0.111118	0.0757422	0.0399181	0.123466	0.0861705	0.188788	0.172034	0.216088	0.214247	0.096862
rs15013134	ANKRD16	416688	1	997782	intron-variant	ss538093261	AX-75188191	C/T	0.470389	0.0460772	0.516909	0.655387	0.524066	0.453975	0.903552	0.190184	0.206083	0.113214	0.84591	0.0268015	0.14668	0.161477	0.881598	0.962371	0.842884	0.905839	0.960042	0.538704	0.480262	0.397844	0.89206	0.120626	0.968204	0.487846	0.579867	0.655702	0.656075	0.759697	0.664668	0.632251	0.508491	0.542546	0.485665	0.469903	0.489654	0.478568	0.415992	0.385797	0.377611
rs315081926	ANKRD16	416688	1	1000128	intron-variant	ss538060056	AX-80796604	C/G	0.797841	0.949295	0.927798	0.279609	0.845625	0.41401	0.543128	0.459248	0.436338	0.836829	0.301125	0.854422	0.993841	0.545721	0.833904	0.992687	0.858782	0.964319	0.990106	0.221208	0.953182	0.525282	0.914802	0.285753	0.283984	0.0272662	0.963366	0.971194	0.971527	0.977135	0.974069	0.945902	0.972016	0.684579	0.967406	0.862506	0.827212	0.902681	0.85313	0.844726	0.839496
rs313716366	ANKRD16	416688	1	1002258	intron-variant	ss537816441	AX-75188848	C/T	0.459761	0.0733808	0.987846	0.517022	0.286809	0.459872	0.738949	0.52462	0.836256	0.488884	0.633182	0.376378	0.160845	0.33294	0.156821	0.0507461	0.0205887	0.603446	0.0502491	0.383841	0.902504	0.981522	0.810561	0.460392	0.617124	0.752064	0.816517	0.765723	0.749341	0.610016	0.770028	0.647077	0.691444	0.712667	0.456327	0.574932	0.334039	0.395767	0.361332	0.37286	0.446931
rs15013157	ANKRD16	416688	1	1003228	intron-variant	ss538111450	AX-75188957	C/T	0.700422	0.974967	0.670301	0.255177	0.598185	0.11686	0.377271	0.94469	0.14956	0.898787	0.340917	0.31532	0.679268	0.446166	0.921059	0.0265581	0.276485	0.163309	0.0268124	0.67556	0.53781	0.996585	0.370105	0.00466226	0.979788	0.000545859	0.284443	0.189015	0.179078	0.0607901	0.152338	0.117775	0.147202	0.0505779	0.0660041	0.0732974	0.117324	0.111804	0.131264	0.147472	0.05915
rs13778668	ANKRD16	416688	1	1005178	intron-variant	ss538078239	AX-75189412	A/G	0.562806	0.553598	0.765035	0.469543	0.901944	0.44613	0.359005	0.699402	0.32153	0.533763	0.100977	0.130337	0.443619	0.311245	0.707934	0.986597	0.492273	0.562875	0.990801	0.247884	0.970793	0.626771	0.725502	0.0108149	0.729966	0.00721357	0.790992	0.89871	0.947118	0.707486	0.767223	0.889724	0.838987	0.539433	0.984887	0.7581	0.946258	0.93714	0.803091	0.752858	0.986349
rs14080607	ANKRD16	416688	1	1005483	intron-variant	ss537766610	AX-75189476	A/G	0.717716	0.568462	0.717218	0.698826	0.415582	0.375516	0.231464	0.286665	0.141395	0.494165	0.110818	0.0852402	0.858249	0.545102	0.601095	0.311169	0.49008	0.953489	0.312632	0.312964	0.901043	0.574533	0.747715	0.00327646	0.64246	0.011144	0.635396	0.728083	0.786757	0.677092	0.81257	0.761658	0.745356	0.457707	0.652075	0.569146	0.727927	0.788297	0.896157	0.959304	0.726897
rs317366971	ANKRD16	416688	1	1007590	intron-variant	ss538007050	AX-75189949	C/T	0.0375989	0.358353	0.280154	0.141576	0.0885295	0.120964	0.614216	0.130854	0.534722	0.410641	0.121408	0.6297	0.558249	0.541321	0.790452	0.828401	0.866037	0.796749	0.826145	0.784917	0.8068	0.843279	0.75413	0.168346	0.689828	0.766442	0.173302	0.187238	0.191238	0.208172	0.274408	0.189461	0.176478	0.171394	0.13722	0.17568	0.173458	0.172814	0.199651	0.195541	0.157126
rs314841410	ANKRD16	416688	1	1009533	intron-variant	ss538132965	AX-75190390	C/T	0.00992373	0.104307	0.12949	0.164043	0.0228849	0.470181	0.766961	0.3195	0.463342	0.318731	0.264328	0.24981	0.467881	0.145198	0.66278	0.30787	0.606102	0.703616	0.310269	0.816631	0.986903	0.661366	0.692331	0.984673	0.703752	0.0657158	0.254335	0.325969	0.323776	0.648519	0.512273	0.421627	0.299523	0.414184	0.441555	0.366472	0.360265	0.36858	0.404679	0.392227	0.511965
rs313990907	ANKRD16	416688	1	1010848	utr-variant-3-prime	ss537735972	AX-75190714	G/T	0.662888	0.884693	0.311227	0.240092	0.528702	0.813048	0.784444	0.5287	0.486474	0.461066	0.733657	0.257197	0.602374	0.865566	0.587296	0.850241	0.514351	0.473361	0.85028	0.301299	0.417238	0.946703	0.74938	0.781836	0.321586	0.724929	0.945562	0.939138	0.965723	0.588815	0.752695	0.98546	0.823162	0.733924	0.789675	0.653266	0.775765	0.734785	0.768029	0.7652	0.868419
rs316468116	ANKRD16	416688	1	1011954	downstream-variant-500B	ss537937942	AX-75190970	C/T	0.58857	0.251099	0.8412	0.908928	0.303477	0.691397	0.966919	0.844713	0.849983	0.671899	0.346763	0.609011	0.643107	0.479478	0.23187	0.156166	0.0658513	0.649519	0.154632	0.497271	0.601744	0.968658	0.303257	0.395824	0.624253	0.635862	0.894728	0.995656	0.986032	0.77117	0.882264	0.726543	0.875874	0.973405	0.709117	0.768982	0.703755	0.808404	0.740232	0.770996	0.714874
rs14080771	ASB13	416691	1	1070133	intron-variant	ss538014899	AX-80962029	C/G	0.728288	0.813759	0.220165	0.763032	0.861108	0.0456872	0.201707	0.175048	0.0359543	0.0559028	0.0800995	0.00762675	0.619546	0.564972	0.959832	0.317517	0.696356	0.448564	0.318942	0.0912463	0.730947	0.330838	0.906422	0.0311541	0.407707	0.0969848	0.826559	0.726619	0.650944	0.354577	0.40097	0.341583	0.316111	0.165208	0.288579	0.280545	0.335838	0.363856	0.461792	0.559781	0.50117
rs314950210	CALML3	416692	1	1085475	upstream-variant-2KB	ss537798171	AX-75207571	C/T	0.866568	0.472836	0.437154	0.955595	0.961772	0.963352	0.741664	0.411136	0.560068	0.316489	0.117212	0.478209	0.779552	0.379907	0.854604	0.0841688	0.174159	0.513209	0.0841721	0.0952831	0.217182	0.358758	0.68986	0.478132	0.630193	0.03177	0.786288	0.735657	0.707185	0.403106	0.568232	0.408389	0.606342	0.565446	0.419983	0.656933	0.853434	0.727492	0.762342	0.856354	0.889492
rs313905741	TUBAL3	416694	1	1147448	upstream-variant-2KB	ss537970449	AX-75221115	C/T	0.00748652	0.331704	0.206309	0.0420082	0.0857476	0.104578	0.0940341	0.777259	0.58541	0.05454	0.264437	0.132409	0.0102415	0.438386	0.859228	0.0523	0.160104	0.455429	0.0522711	0.659159	0.501729	0.817683	0.883683	0.14427	0.485264	0.0593516	0.0973558	0.141244	0.124838	0.0685178	0.115779	0.0742262	0.0436905	0.0465157	0.0674491	0.0460384	0.0397492	0.0267941	0.0394185	0.0440716	0.052721
rs15743772	TUBAL3	416694	1	1151980	reference,synonymous-codon	ss538008828	AX-75221842	A/G	0.0103829	0.341636	0.166936	0.0439037	0.0896196	0.211702	0.276046	0.448361	0.623936	0.238219	0.252809	0.496038	0.00476534	0.563797	0.659571	0.25664	0.25937	0.970742	0.256608	0.926224	0.873264	0.906766	0.829994	0.256779	0.206964	0.0313938	0.820588	0.791373	0.768667	0.74154	0.972843	0.844757	0.812154	0.952552	0.967523	0.975288	0.780597	0.634152	0.719811	0.708004	0.743922
rs14080910	TUBAL3	416694	1	1155330	utr-variant-3-prime	ss538120643	AX-75222447	C/T	0.639792	0.736347	0.0574161	0.802008	0.192027	0.366754	0.442403	0.763597	0.381963	0.454485	0.238274	0.214978	0.369659	0.399109	0.641776	0.0295072	0.0496532	0.667912	0.0297255	0.130546	0.481942	0.916322	0.84512	0.173116	0.538251	0.039628	0.843635	0.804459	0.798758	0.539477	0.750092	0.518886	0.601536	0.604151	0.43689	0.581776	0.574336	0.423284	0.404143	0.409384	0.3641
rs314403360	LOC416695	416695	1	1160187	intron-variant	ss537786702	AX-75223434	C/T	0.307389	0.334664	0.644674	0.409072	0.0708995	0.748577	0.136968	0.402444	0.779357	0.950833	0.19158	0.921863	0.535148	0.215355	0.787441	0.808279	0.809002	0.694956	0.808315	0.831322	0.372094	0.144478	0.437975	0.751702	0.854504	0.126916	0.87603	0.788746	0.831827	0.653269	0.671863	0.770891	0.760099	0.759415	0.603414	0.737444	0.742248	0.767801	0.689225	0.665996	0.426594
rs14080922	LOC416695	416695	1	1160610	intron-variant	ss538046575	AX-75223515	G/T	0.909525	0.990689	0.0993618	0.919379	0.417177	0.680145	0.55077	0.764391	0.313546	0.36212	0.105396	0.144069	0.642039	0.554836	0.996994	0.0433001	0.136862	0.41243	0.0435868	0.192178	0.957773	0.197253	0.76642	0.109789	0.992328	0.0186431	0.507449	0.54996	0.53233	0.325782	0.397088	0.261458	0.315912	0.338141	0.270116	0.32556	0.343281	0.237793	0.241852	0.267953	0.310391
rs15013352	MIR205B	777842	1	1223486	downstream-variant-500B	ss537916522	AX-75236989	C/T	0.0293911	0.505101	0.0560394	0.168812	0.253768	0.0702827	0.643182	0.408545	0.847376	0.682186	0.521281	0.984423	0.191	0.814119	0.298179	0.355164	0.303188	0.799408	0.35799	0.740451	0.183175	0.803854	0.776465	0.407452	0.992859	0.875667	0.211948	0.338532	0.356082	0.35117	0.253656	0.269781	0.325224	0.500249	0.325713	0.450481	0.316173	0.250495	0.205826	0.218408	0.279737
rs313455109	MIR205B	777842	1	1224545	upstream-variant-2KB	ss537824270	AX-75237232	A/G	0.0297591	0.673625	0.0733889	0.168971	0.267342	0.0691471	0.586163	0.389826	0.907791	0.600796	0.456777	0.860426	0.16524	0.707828	0.364741	0.260641	0.323556	0.969754	0.262947	0.725513	0.173278	0.904634	0.821861	0.445598	0.941227	0.750686	0.213456	0.340407	0.358348	0.354746	0.258873	0.274952	0.328671	0.500427	0.322038	0.444735	0.311316	0.247222	0.20548	0.220481	0.286169
rs315212260	EXOC4	416700	1	1371132	downstream-variant-500B	ss538179468	AX-75268667	C/T	0.641527	0.022303	0.338066	0.869587	0.157491	0.649524	0.0496009	0.343948	0.825831	0.295845	0.509729	0.419591	0.852147	0.355337	0.693775	0.834119	0.994391	0.86712	0.834098	0.456064	0.418986	0.832286	0.226309	0.89788	0.135713	0.305854	0.208252	0.244608	0.214884	0.252517	0.315843	0.311015	0.213726	0.22626	0.411625	0.172393	0.0736467	0.138427	0.18232	0.180706	0.292702
rs313571066	EXOC4	416700	1	1376141	intron-variant	ss538237930	AX-75269867	A/G	0.814264	0.216864	0.915169	0.792931	0.224907	0.56744	0.279525	0.298066	0.457211	0.256466	0.741842	0.410038	0.537055	0.644516	0.547938	0.32243	0.597818	0.942281	0.3224	0.889581	0.501072	0.975474	0.280398	0.422587	0.11898	0.585613	0.130988	0.179149	0.164528	0.268333	0.342783	0.246934	0.316894	0.478972	0.476271	0.252349	0.0704207	0.135579	0.15009	0.150098	0.315508
rs315192178	EXOC4	416700	1	1381949	intron-variant	ss537857047	AX-75271128	G/T	0.421814	0.501577	0.966922	0.762986	0.0287634	0.690098	0.28932	0.554897	0.379002	0.285218	0.25206	0.319651	0.0283579	0.379535	0.542328	0.796601	0.902195	0.303142	0.794768	0.652152	0.277205	0.882546	0.565057	0.754286	0.628778	0.460162	0.248295	0.371334	0.350716	0.414036	0.547542	0.50605	0.630969	0.751809	0.917818	0.495292	0.262573	0.41129	0.475503	0.481179	0.671048
rs313843505	EXOC4	416700	1	1390734	intron-variant	ss537912634	AX-75273116	C/T	0.642357	0.485542	0.682809	0.551244	0.591835	0.573206	0.0789463	0.900229	0.974315	0.801178	0.619742	0.719482	0.0376473	0.343343	0.861662	0.236198	0.743039	0.776585	0.236175	0.215826	0.561576	0.874532	0.744831	0.654612	0.357823	0.963877	0.435601	0.548556	0.554845	0.392369	0.534045	0.396066	0.572852	0.491632	0.480517	0.464749	0.274005	0.346683	0.279434	0.270932	0.27912
rs315412073	EXOC4	416700	1	1394747	intron-variant	ss537926972	AX-75273661	A/G	0.204465	0.0852103	0.46363	0.748853	0.258066	0.884989	0.207434	0.946698	0.875688	0.410963	0.623224	0.449155	0.775491	0.657711	0.965467	0.31912	0.755444	0.418855	0.319117	0.674898	0.188294	0.90146	0.529014	0.921227	0.223956	0.78504	0.89669	0.797329	0.779096	0.66433	0.815661	0.730359	0.62092	0.466451	0.615347	0.560328	0.449172	0.505821	0.48517	0.459168	0.434706
rs315267275	EXOC4	416700	1	1398629	intron-variant	ss537765574	AX-75274499	A/C	0.744155	0.667547	0.771421	0.582352	0.0336904	0.636498	0.493279	0.178596	0.974535	0.815057	0.235201	0.991681	0.0970328	0.388816	0.830507	0.360985	0.480041	0.96766	0.362239	0.191253	0.615151	0.69001	0.188516	0.982633	0.683176	0.133719	0.587469	0.583705	0.553914	0.779793	0.739972	0.777035	0.513953	0.58506	0.781035	0.606224	0.532587	0.605972	0.734111	0.763558	0.985255
rs315577730	EXOC4	416700	1	1399072	intron-variant	ss537986528	AX-75274595	C/T	0.877992	0.119549	0.756149	0.571167	0.0560548	0.901919	0.076524	0.202761	0.492231	0.599771	0.815154	0.799469	0.979823	0.365713	0.979519	0.867049	0.704224	0.997121	0.867085	0.574793	0.654509	0.668337	0.265673	0.444916	0.181293	0.30896	0.449219	0.521949	0.493264	0.605356	0.804427	0.75533	0.64646	0.67644	0.981804	0.585718	0.334172	0.488938	0.554102	0.543311	0.730339
rs14081241	EXOC4	416700	1	1402899	intron-variant	ss537778323	AX-75275376	A/G	0.141477	0.592991	0.544001	0.314895	0.90741	0.0881445	0.253945	0.221517	0.774102	0.911714	0.312074	0.839413	0.804986	0.602785	0.458831	0.44875	0.810478	0.253457	0.445961	0.521517	0.331368	0.977918	0.0563975	0.427469	0.509196	0.347882	0.263094	0.313295	0.310812	0.257194	0.217967	0.163566	0.195981	0.184462	0.134565	0.230112	0.163133	0.192712	0.172157	0.195018	0.249616
rs313973135	EXOC4	416700	1	1406333	intron-variant	ss537919000	AX-75276120	A/G	0.733105	0.58831	0.51771	0.933871	0.0240919	0.724932	0.804656	0.274295	0.56704	0.967861	0.501416	0.787777	0.0975914	0.787664	0.949638	0.27186	0.633129	0.688873	0.271854	0.0927611	0.852671	0.616038	0.713482	0.881738	0.995464	0.2154	0.867861	0.793908	0.756834	0.917746	0.899232	0.780162	0.88716	0.991318	0.719356	0.942928	0.912869	0.984399	0.822721	0.816703	0.638848
rs15013537	EXOC4	416700	1	1407557	intron-variant	ss538175118	AX-80979619	C/G	0.638427	0.348105	0.802399	0.494458	0.0482363	0.585617	0.198345	0.16204	0.337444	0.836561	0.686323	0.931154	0.775494	0.424568	0.735104	0.744891	0.837279	0.974991	0.74484	0.731182	0.404228	0.932408	0.291669	0.65911	0.302553	0.129234	0.518081	0.502278	0.466523	0.621413	0.902291	0.799476	0.717424	0.741865	0.934598	0.648713	0.289969	0.463563	0.548615	0.520371	0.749082
rs14081242	EXOC4	416700	1	1409519	intron-variant	ss537749006	AX-75276629	C/T	0.698932	0.979574	0.896081	0.890702	0.0253724	0.439076	0.59256	0.295808	0.468904	0.613324	0.969714	0.868997	0.250494	0.804174	0.669804	0.593852	0.929104	0.573711	0.593852	0.335061	0.937844	0.494494	0.748041	0.701293	0.650068	0.451596	0.805296	0.821993	0.801509	0.726211	0.675334	0.735684	0.794086	0.502976	0.478767	0.777601	0.963939	0.926769	0.815951	0.825515	0.521524
rs14081245	EXOC4	416700	1	1412797	intron-variant	ss538152022	AX-75277163	C/T	0.680281	0.861237	0.866909	0.84893	0.0410293	0.412838	0.442616	0.292657	0.440159	0.499845	0.909625	0.7553	0.269691	0.90139	0.626953	0.65293	0.989966	0.559682	0.652917	0.35745	0.953033	0.66724	0.663552	0.61226	0.72871	0.515823	0.735134	0.763098	0.752368	0.769151	0.711158	0.757834	0.793137	0.489605	0.466263	0.758678	0.969953	0.941395	0.849855	0.874081	0.58631
rs316927576	EXOC4	416700	1	1415416	intron-variant	ss538019554	AX-75277548	C/T	0.75917	0.6024	0.544883	0.919001	0.0369479	0.768643	0.728229	0.293775	0.504571	0.954877	0.617306	0.887052	0.10689	0.878265	0.767298	0.354231	0.84959	0.585736	0.354214	0.114559	0.944369	0.731629	0.639682	0.868373	0.986179	0.224581	0.879105	0.822669	0.790914	0.889	0.864391	0.745795	0.944611	0.948462	0.671436	0.998058	0.965021	0.967804	0.797589	0.807444	0.647723
rs316450356	EXOC4	416700	1	1416798	intron-variant	ss537927414	AX-80889277	C/G	0.42917	0.206418	0.854611	0.29315	0.701914	0.32462	0.801817	0.532582	0.306267	0.511367	0.685012	0.321434	0.45027	0.756185	0.619128	0.842553	0.505087	0.722251	0.842526	0.261557	0.0706392	0.552826	0.773805	0.351707	0.700897	0.809487	0.0810812	0.140705	0.135668	0.122631	0.0780751	0.105363	0.0721034	0.0596606	0.143265	0.0500833	0.0834909	0.0968712	0.112432	0.140922	0.166879
rs315955247	EXOC4	416700	1	1417951	intron-variant	ss537792677	AX-75277960	C/T	0.761342	0.335505	0.988126	0.525427	0.124368	0.51157	0.845419	0.0071816	0.376121	0.847795	0.624503	0.445329	0.302863	0.737349	0.589101	0.952228	0.576645	0.354681	0.952203	0.190516	0.454005	0.931447	0.214505	0.0943772	0.375056	0.140559	0.0801742	0.0755099	0.0703312	0.13224	0.151198	0.171925	0.0991845	0.16114	0.227042	0.15034	0.0425923	0.0692006	0.0916239	0.0912964	0.201184
rs317686143	EXOC4	416700	1	1422218	intron-variant	ss538185349	AX-75278921	A/G	0.850297	0.102814	0.726451	0.891301	0.188635	0.976521	0.880861	0.0283091	0.275597	0.693561	0.798485	0.445576	0.342504	0.625036	0.888664	0.49941	0.738405	0.615655	0.499351	0.370927	0.22475	0.866514	0.404467	0.279241	0.424487	0.0667342	0.144734	0.150567	0.139967	0.257026	0.30941	0.309686	0.214505	0.260298	0.34204	0.196562	0.0431133	0.0917894	0.11636	0.116123	0.237312
rs314807773	EXOC4	416700	1	1422812	reference,synonymous-codon	ss537930227	AX-75279074	C/T	0.313311	0.590258	0.934462	0.34333	0.731955	0.12141	0.173442	0.0981661	0.975743	0.73778	0.280062	0.662556	0.672306	0.623112	0.28587	0.974744	0.432415	0.22723	0.971209	0.445674	0.68633	0.75045	0.092727	0.483718	0.483097	0.127093	0.334903	0.390408	0.385672	0.323688	0.276484	0.211181	0.249274	0.23822	0.178552	0.291303	0.21542	0.258721	0.239378	0.271366	0.349213
rs315836380	EXOC4	416700	1	1428392	intron-variant	ss537848831	AX-75280452	A/G	0.689157	0.0983422	0.704767	0.811517	0.172369	0.782907	0.832103	0.020731	0.304296	0.78985	0.771173	0.471291	0.204156	0.856811	0.878953	0.635	0.951958	0.488315	0.634921	0.413929	0.256111	0.916936	0.293454	0.157576	0.306663	0.126008	0.186631	0.199641	0.18788	0.325571	0.381617	0.383745	0.281407	0.350163	0.439128	0.268032	0.069345	0.135552	0.164167	0.160131	0.297052
rs312954208	EXOC4	416700	1	1429662	intron-variant	ss537783322	AX-75280775	C/T	0.831964	0.639853	0.265149	0.654576	0.562667	0.328491	0.901393	0.24658	0.423053	0.633172	0.167077	0.48716	0.00381927	0.986755	0.113396	0.599719	0.326087	0.0751512	0.601456	0.420315	0.159352	0.976764	0.0367092	0.48821	0.335108	0.457869	0.849042	0.715423	0.708126	0.851529	0.793152	0.736366	0.546621	0.50161	0.579489	0.600522	0.686491	0.665323	0.688979	0.681124	0.652765
rs317179085	EXOC4	416700	1	1432661	intron-variant	ss538080879	AX-75281468	A/G	0.342982	0.785591	0.30469	0.9362	0.0121726	0.659784	0.61185	0.368495	0.636886	0.626619	0.83364	0.702326	0.234617	0.4237	0.112994	0.759782	0.667191	0.0433774	0.759874	0.442927	0.166242	0.469581	0.430616	0.576073	0.583948	0.146094	0.423029	0.529087	0.491809	0.625054	0.567718	0.684634	0.595712	0.73212	0.857654	0.689128	0.456843	0.612996	0.77738	0.838958	0.793118
rs316267785	EXOC4	416700	1	1436496	intron-variant	ss538233244	AX-75282293	C/T	0.114199	0.405911	0.477095	0.354348	0.19447	0.372725	0.23317	0.0508287	0.787291	0.50494	0.643633	0.443519	0.489283	0.266135	0.899567	0.730257	0.845554	0.91842	0.730108	0.310807	0.860182	0.97104	0.962755	0.87148	0.648947	0.0189637	0.124954	0.172266	0.148732	0.107588	0.102845	0.120493	0.0614038	0.0425063	0.0798822	0.0623498	0.0212356	0.0482555	0.0693874	0.0906458	0.168111
rs313095325	EXOC4	416700	1	1440600	intron-variant	ss538024965	AX-75283196	C/T	0.740866	0.344354	0.795276	0.901464	0.237908	0.939256	0.587015	0.426588	0.699316	0.742321	0.167554	0.556019	0.128021	0.914785	0.675685	0.288966	0.965131	0.282507	0.290688	0.908926	0.417491	0.690376	0.545557	0.13851	0.631914	0.653626	0.27554	0.267531	0.279864	0.226328	0.295377	0.293472	0.365551	0.460938	0.377985	0.420399	0.168178	0.194278	0.153494	0.133955	0.154039
rs314329281	EXOC4	416700	1	1443308	intron-variant	ss538081954	AX-75283830	C/T	0.740866	0.344354	0.795276	0.901464	0.237908	0.939256	0.546396	0.426588	0.699316	0.742321	0.189802	0.556019	0.128021	0.914785	0.675685	0.288966	0.965131	0.282507	0.290688	0.908926	0.417491	0.690376	0.545557	0.13851	0.623701	0.653626	0.283056	0.277872	0.29216	0.240772	0.310983	0.31352	0.392256	0.493769	0.407029	0.446141	0.184451	0.20834	0.166801	0.146495	0.167712
rs317245665	EXOC4	416700	1	1443550	intron-variant	ss538135976	AX-75283871	C/T	0.540434	0.72639	0.31185	0.590504	0.741641	0.533296	0.90138	0.810468	0.484251	0.822211	0.485028	0.976068	0.00593219	0.644182	0.259133	0.482291	0.471158	0.262004	0.482253	0.301067	0.188951	0.964235	0.13761	0.984926	0.917201	0.774853	0.185435	0.291348	0.299595	0.218697	0.211052	0.238397	0.420443	0.435617	0.405643	0.427644	0.241428	0.326309	0.304611	0.322943	0.439343
rs15013580	EXOC4	416700	1	1448623	intron-variant	ss538003468	AX-75284970	A/G	0.217071	0.819768	0.233278	0.919461	0.598687	0.69219	0.746247	0.350129	0.385339	0.941791	0.419569	0.988055	0.0534479	0.5969	0.633419	0.261369	0.591835	0.866862	0.261296	0.711385	0.312544	0.429726	0.632291	0.811465	0.847876	0.345017	0.208364	0.292814	0.269787	0.175643	0.101799	0.0995239	0.137763	0.135969	0.0880325	0.14973	0.0733891	0.113831	0.109051	0.131488	0.229244
rs317668073	EXOC4	416700	1	1453572	intron-variant	ss538116784	AX-75286043	C/T	0.613983	0.947503	0.808203	0.814407	0.0294196	0.426784	0.433261	0.201542	0.342556	0.811759	0.848572	0.866833	0.257214	0.962414	0.437235	0.738457	0.848707	0.365494	0.738467	0.43891	0.792992	0.414274	0.751007	0.521078	0.562365	0.420001	0.777311	0.791775	0.770905	0.760113	0.78442	0.828543	0.871981	0.556662	0.563053	0.794657	0.940032	0.950898	0.835365	0.850951	0.547771
rs318203903	EXOC4	416700	1	1453788	intron-variant	ss537786751	AX-75286093	C/T	0.784209	0.5892	0.560782	0.717845	0.0214777	0.993166	0.577649	0.131945	0.154627	0.76288	0.976456	0.890692	0.126449	0.983197	0.986144	0.569784	0.672053	0.793093	0.569802	0.237396	0.590703	0.40391	0.523556	0.430545	0.78617	0.427169	0.69211	0.732703	0.699987	0.847647	0.939807	0.930057	0.848936	0.852023	0.848391	0.936621	0.771833	0.853523	0.963849	0.973924	0.720625
rs15744734	EXOC4	416700	1	1456219	intron-variant	ss538251511	AX-75286585	A/G	0.793026	0.549298	0.932888	0.827087	0.676308	0.931559	0.528021	0.637065	0.997931	0.941441	0.848492	0.884369	0.680748	0.950096	0.963061	0.190461	0.406061	0.593579	0.189129	0.193614	0.133619	0.732127	0.162393	0.698092	0.473109	0.535706	0.78812	0.931992	0.931459	0.882911	0.848464	0.690458	0.843527	0.732386	0.597039	0.699047	0.492087	0.624536	0.544145	0.56753	0.594171
rs14081338	EXOC4	416700	1	1456526	intron-variant	ss537976504	AX-75286642	A/G	0.81232	0.602858	0.532278	0.70437	0.0216501	0.933723	0.555413	0.118499	0.148936	0.898505	0.908714	0.762736	0.10921	0.998189	0.998104	0.68513	0.757034	0.851737	0.685154	0.232885	0.605553	0.395126	0.641483	0.41524	0.761936	0.387447	0.730057	0.771104	0.738477	0.807311	0.898252	0.97156	0.889649	0.811605	0.808637	0.976931	0.811756	0.894918	0.991854	0.979755	0.675025
rs317512856	EXOC4	416700	1	1458312	intron-variant	ss537729639	AX-75287026	C/T	0.0919138	0.304574	0.429138	0.190236	0.539054	0.161143	0.737777	0.309614	0.142008	0.751237	0.791301	0.642642	0.188876	0.755754	0.0967674	0.766734	0.242418	0.158406	0.766795	0.263973	0.582647	0.907028	0.628014	0.536943	0.585131	0.745891	0.965472	0.964253	0.996561	0.99255	0.842014	0.646226	0.567885	0.545821	0.525995	0.595521	0.793414	0.737693	0.735528	0.798443	0.770803
rs15013588	EXOC4	416700	1	1462293	intron-variant	ss538007864	AX-75287900	C/T	0.333974	0.0959337	0.168021	0.792662	0.605032	0.497833	0.639751	0.241705	0.269862	0.488956	0.758708	0.324273	0.703476	0.898937	0.539079	0.934786	0.474624	0.554736	0.934838	0.912587	0.139429	0.497569	0.721742	0.0932378	0.464238	0.878846	0.088822	0.115826	0.119895	0.19179	0.150723	0.0977547	0.182738	0.359828	0.27332	0.289551	0.193244	0.201391	0.189183	0.194702	0.353627
rs14081356	EXOC4	416700	1	1465247	intron-variant	ss537742328	AX-75288552	A/G	0.241101	0.430557	0.799356	0.217156	0.0127199	0.23877	0.0925649	0.949355	0.966088	0.434522	0.0588228	0.410588	0.332127	0.416179	0.82138	0.424837	0.72959	0.547179	0.426288	0.454672	0.383638	0.273136	0.238205	0.278902	0.646676	0.555064	0.550808	0.584481	0.602641	0.417218	0.365424	0.405842	0.599794	0.523514	0.475971	0.509007	0.468047	0.482346	0.384564	0.360736	0.293922
rs13778884	EXOC4	416700	1	1468781	intron-variant	ss537751866	AX-75289328	C/T	0.619846	0.922067	0.492804	0.259065	0.242649	0.132766	0.136647	0.702917	0.459442	0.664377	0.0311	0.764955	0.0683497	0.781189	0.116904	0.544352	0.207954	0.153528	0.545906	0.624544	0.557878	0.757957	0.00878004	0.901422	0.588313	0.973117	0.73723	0.850321	0.860283	0.788831	0.686636	0.846509	0.958536	0.902891	0.914912	0.894412	0.830804	0.939277	0.933504	0.938468	0.924921
rs318178266	EXOC4	416700	1	1476901	intron-variant	ss538087009	AX-75290898	C/T	0.0108051	0.165661	0.0959909	0.152626	0.030109	0.0871877	0.0893156	0.0568897	0.980983	0.797998	0.621998	0.931134	0.847132	0.445926	0.805577	0.97753	0.875356	0.643811	0.975278	0.530811	0.713064	0.543213	0.511675	0.775307	0.756926	0.0678469	0.207963	0.319122	0.284522	0.294608	0.19586	0.166102	0.140688	0.177698	0.18501	0.203569	0.126378	0.193684	0.246487	0.311866	0.589593
rs315244676	EXOC4	416700	1	1479263	intron-variant	ss537848640	AX-75291285	A/G	0.127711	0.367863	0.371079	0.66074	0.578555	0.311115	0.832235	0.145279	0.476137	0.332701	0.736265	0.263552	0.767938	0.72847	0.576662	0.789384	0.52703	0.696121	0.789419	0.362914	0.287691	0.902224	0.391168	0.387792	0.287164	0.392383	0.139902	0.169177	0.159096	0.0696479	0.0340539	0.0684494	0.0466205	0.0368448	0.0678196	0.115662	0.129964	0.139108	0.161573	0.202044	0.24954
rs315128838	EXOC4	416700	1	1483000	intron-variant	ss538210149	AX-75291884	A/G	0.494442	0.0617106	0.372112	0.990795	0.682356	0.619785	0.266038	0.571851	0.992355	0.924512	0.520686	0.77928	0.157054	0.69452	0.988265	0.933752	0.86187	0.930566	0.931701	0.990812	0.799051	0.750787	0.699929	0.740668	0.962179	0.78858	0.717265	0.69633	0.688141	0.968587	0.702767	0.618388	0.735518	0.967784	0.715998	0.990428	0.938483	0.918844	0.933713	0.959905	0.811981
rs316713322	EXOC4	416700	1	1487087	intron-variant	ss538172618	AX-75292619	A/G	0.164814	0.295213	0.533447	0.0720343	0.407489	0.264528	0.0234094	0.421496	0.961305	0.131975	0.996355	0.102117	0.423193	0.886602	0.365027	0.243911	0.193118	0.99913	0.243905	0.873951	0.604455	0.768395	0.353734	0.793348	0.619803	0.246248	0.159296	0.133339	0.127917	0.168513	0.122963	0.202308	0.167003	0.160965	0.197588	0.180377	0.0806037	0.122187	0.147255	0.151719	0.233296
rs13778908	EXOC4	416700	1	1489563	intron-variant	ss537726912	AX-75293112	C/T	0.994965	0.838301	0.860978	0.715835	0.0447434	0.916606	0.116828	0.89211	0.760341	0.340273	0.0452579	0.372823	0.421643	0.505539	0.271514	0.441611	0.777042	0.163018	0.443149	0.503953	0.353416	0.212675	0.345951	0.451873	0.97281	0.829656	0.567348	0.522628	0.523126	0.403325	0.357209	0.314396	0.464234	0.402398	0.302598	0.431311	0.395473	0.399702	0.328298	0.327009	0.273892
rs14081385	EXOC4	416700	1	1492323	intron-variant	ss538082639	AX-75293592	C/T	0.100021	0.758315	0.787413	0.722677	0.990591	0.44209	0.125225	0.413561	0.0789464	0.902291	0.934261	0.537914	0.00826049	0.321689	0.587654	0.887079	0.934631	0.434938	0.887017	0.801523	0.375433	0.810524	0.29356	0.107797	0.196042	0.476546	0.413701	0.484615	0.461155	0.201016	0.192905	0.274083	0.237356	0.132704	0.187937	0.24634	0.26092	0.310383	0.349139	0.40946	0.409474
rs317147731	EXOC4	416700	1	1496423	intron-variant	ss537818231	AX-75294270	A/G	0.862634	0.667813	0.902076	0.890395	0.139488	0.746766	0.188392	0.329909	0.391949	0.44673	0.476536	0.60031	0.683078	0.679152	0.285171	0.640328	0.732231	0.1816	0.640378	0.269545	0.614774	0.780672	0.940004	0.55992	0.504676	0.381322	0.783867	0.83441	0.767538	0.666814	0.603877	0.928521	0.522396	0.446562	0.750599	0.535589	0.594006	0.692137	0.929647	0.972627	0.803528
rs315104426	EXOC4	416700	1	1497645	intron-variant	ss538243992	AX-75294557	C/T	0.91186	0.141671	0.664803	0.986936	0.209076	0.908139	0.253033	0.0181785	0.341035	0.939936	0.462159	0.641447	0.897937	0.814549	0.166922	0.897549	0.184773	0.231265	0.897599	0.435377	0.349465	0.627802	0.065517	0.118476	0.183843	0.269663	0.0324267	0.0405115	0.0337396	0.0325226	0.0301819	0.0289036	0.0176202	0.0148837	0.0242717	0.00837287	0.010241	0.0157222	0.020125	0.0241811	0.0402522
rs316388384	EXOC4	416700	1	1501384	intron-variant	ss538038300	AX-80948219	A/T	0.0949212	0.899509	0.708183	0.243175	0.335686	0.405122	0.449684	0.571485	0.551491	0.723062	0.393971	0.927169	0.387457	0.400169	0.676996	0.409654	0.635787	0.968805	0.409564	0.794736	0.848373	0.942525	0.635732	0.384154	0.216916	0.087095	0.636306	0.645807	0.612547	0.579293	0.634275	0.676749	0.552982	0.497559	0.545031	0.681787	0.303424	0.460046	0.529866	0.579164	0.736031
rs315152907	EXOC4	416700	1	1503727	intron-variant	ss537967166	AX-75295684	A/G	0.362429	0.740862	0.951321	0.77245	0.0289997	0.991246	0.557806	0.470704	0.556185	0.959959	0.481207	0.992227	0.688014	0.544756	0.468461	0.469644	0.888793	0.228128	0.469694	0.221024	0.306203	0.823422	0.723735	0.228297	0.270178	0.0851839	0.716127	0.657861	0.614747	0.657276	0.711929	0.977337	0.648264	0.585648	0.851221	0.725603	0.665755	0.768608	0.988918	0.960455	0.804746
rs313115017	EXOC4	416700	1	1504651	intron-variant	ss537914643	AX-75295855	A/G	0.692521	0.441678	0.838538	0.710058	0.285	0.426263	0.0213825	0.00905508	0.402957	0.786992	0.699242	0.812292	0.860474	0.928217	0.26408	0.851508	0.294057	0.344761	0.851562	0.510218	0.0590524	0.608275	0.0570729	0.0968028	0.183444	0.244281	0.0725112	0.0980494	0.0789222	0.0538842	0.0431727	0.0372671	0.0214052	0.0179258	0.033466	0.0108085	0.0167276	0.0258902	0.0345512	0.0439001	0.076018
rs314221314	EXOC4	416700	1	1505572	intron-variant	ss538082993	AX-75296051	C/T	0.148323	0.767116	0.72543	0.701399	0.796584	0.482071	0.0195026	0.411299	0.316038	0.6942	0.846301	0.662934	0.0376229	0.62361	0.936606	0.994526	0.68689	0.795794	0.994429	0.835982	0.950039	0.625459	0.825095	0.969006	0.460879	0.37935	0.197216	0.285752	0.256878	0.0935222	0.0760457	0.116949	0.0842583	0.0398375	0.0708759	0.064275	0.0900258	0.120212	0.144518	0.188117	0.209595
rs315022158	EXOC4	416700	1	1506056	intron-variant	ss538211352	AX-75296163	A/G	0.1945	0.359977	0.714801	0.365588	0.286454	0.515487	0.207643	0.0859804	0.866976	0.777614	0.392686	0.914627	0.600035	0.822275	0.877264	0.341546	0.715524	0.790818	0.341429	0.572256	0.482185	0.919593	0.4273	0.770399	0.543003	0.145944	0.263029	0.315874	0.283644	0.213649	0.211906	0.264438	0.166471	0.13581	0.157536	0.170693	0.0618853	0.11756	0.152205	0.186902	0.29261
rs313264122	EXOC4	416700	1	1507730	intron-variant	ss538001536	AX-75296488	G/T	0.148323	0.767116	0.72543	0.701399	0.796584	0.482071	0.0202387	0.411299	0.316038	0.6942	0.85579	0.662934	0.0376229	0.62361	0.936606	0.994526	0.68689	0.795794	0.994429	0.835982	0.950039	0.625459	0.825095	0.969006	0.472598	0.37935	0.188315	0.273921	0.245585	0.0766756	0.0631544	0.100358	0.0721134	0.0334003	0.0600175	0.0537403	0.0748751	0.101009	0.121682	0.159897	0.178393
rs315190418	EXOC4	416700	1	1508171	intron-variant	ss538216792	AX-75296536	C/T	0.692521	0.441678	0.838538	0.710058	0.285	0.426263	0.0219934	0.00905508	0.402957	0.786992	0.706964	0.812292	0.860474	0.928217	0.26408	0.851508	0.294057	0.344761	0.851562	0.510218	0.0590524	0.608275	0.0570729	0.0968028	0.183583	0.244281	0.0736532	0.0994808	0.0801378	0.0548158	0.0439463	0.0379381	0.0218345	0.0182727	0.0340067	0.0110189	0.0170224	0.026347	0.0351871	0.0447558	0.0775119
rs316087850	EXOC4	416700	1	1509894	intron-variant	ss538025426	AX-75296873	A/G	0.441359	0.831903	0.781911	0.705542	0.317431	0.857858	0.377752	0.950654	0.165352	0.632094	0.337152	0.486881	0.984761	0.709622	0.264708	0.857047	0.535476	0.208309	0.859141	0.690908	0.217523	0.379779	0.910643	0.282207	0.24726	0.598374	0.784562	0.792661	0.809882	0.856174	0.874594	0.634855	0.851483	0.907726	0.83483	0.656942	0.789733	0.708531	0.58511	0.530962	0.439256
rs316792279	EXOC4	416700	1	1509914	intron-variant	ss538073658	AX-75296882	G/T	0.441359	0.831903	0.781911	0.705542	0.317431	0.857858	0.429757	0.950654	0.165352	0.632094	0.321249	0.486881	0.984761	0.709622	0.264708	0.857047	0.535476	0.208309	0.859141	0.690908	0.217523	0.379779	0.910643	0.282207	0.255516	0.598374	0.825284	0.843575	0.861429	0.808804	0.830913	0.593907	0.798066	0.844652	0.76814	0.668847	0.809885	0.723495	0.600009	0.541012	0.444322
rs314588626	EXOC4	416700	1	1510279	intron-variant	ss538048677	AX-75296942	C/T	0.761949	0.892004	0.904856	0.827135	0.197329	0.964017	0.863104	0.596992	0.912038	0.785392	0.178007	0.820575	0.0585721	0.99906	0.49167	0.782392	0.613539	0.536577	0.784423	0.596225	0.738881	0.272776	0.532558	0.798024	0.922375	0.746672	0.469354	0.56847	0.575704	0.339391	0.334562	0.274282	0.40468	0.308356	0.317486	0.268065	0.390856	0.354918	0.278598	0.275447	0.193114
rs15013643	EXOC4	416700	1	1512832	intron-variant	ss538181505	AX-75297414	A/G	0.436441	0.304425	0.997498	0.685727	0.16386	0.968677	0.695703	0.243615	0.701758	0.600623	0.205701	0.600228	0.437412	0.548417	0.785683	0.871366	0.991811	0.757144	0.873102	0.236173	0.839927	0.983594	0.367785	0.710494	0.486002	0.0758088	0.253562	0.293553	0.261597	0.235719	0.254628	0.337829	0.189234	0.155007	0.29798	0.171873	0.0854401	0.149187	0.213491	0.242196	0.343544
rs318170388	EXOC4	416700	1	1514486	intron-variant	ss537902457	AX-75297675	A/G	0.476976	0.312654	0.836506	0.419201	0.440387	0.434317	0.833529	0.862403	0.977767	0.519479	0.616261	0.544358	0.741014	0.902659	0.374845	0.170278	0.883904	0.0733918	0.170267	0.941114	0.376596	0.367212	0.50633	0.909058	0.435959	0.474391	0.705487	0.680131	0.679121	0.504964	0.554797	0.510421	0.42465	0.27544	0.295512	0.412913	0.291407	0.330961	0.299389	0.316565	0.248138
rs314330225	EXOC4	416700	1	1516786	intron-variant	ss538036690	AX-75298134	C/T	0.621586	0.137298	0.449307	0.559955	0.892448	0.642415	0.723453	0.600114	0.566817	0.389855	0.226579	0.380244	0.903804	0.866795	0.373254	0.484618	0.833846	0.171559	0.486282	0.585863	0.250062	0.260252	0.84014	0.817616	0.520099	0.30712	0.725666	0.606513	0.589521	0.489671	0.627403	0.6466	0.490628	0.334638	0.393103	0.390624	0.303656	0.339135	0.346344	0.347653	0.26662
rs14081420	EXOC4	416700	1	1519452	intron-variant	ss538272656	AX-75298662	C/T	0.448783	0.662467	0.586979	0.396347	0.341318	0.731832	0.340154	0.844862	0.944806	0.991524	0.213357	0.984846	0.581294	0.867757	0.589889	0.0410991	0.570925	0.0994825	0.0410935	0.330341	0.28932	0.369533	0.52302	0.850475	0.689867	0.993049	0.751859	0.741066	0.77426	0.793121	0.887401	0.668855	0.901358	0.920893	0.588553	0.957534	0.497789	0.560368	0.435852	0.420703	0.411765
rs313724286	EXOC4	416700	1	1526380	intron-variant	ss538086516	AX-75300277	A/G	0.451755	0.933341	0.936999	0.655789	0.195463	0.890525	0.468151	0.996162	0.949417	0.833171	0.844704	0.822988	0.964434	0.946831	0.781419	0.549467	0.696819	0.64872	0.551206	0.123454	0.0748149	0.332253	0.327556	0.402873	0.360505	0.856072	0.913733	0.834911	0.885609	0.999403	0.90969	0.838512	0.880914	0.90677	0.868838	0.973421	0.99129	0.873644	0.70564	0.633883	0.609366
rs315632606	EXOC4	416700	1	1530042	intron-variant	ss538154845	AX-75301131	C/T	0.815978	0.493586	0.814875	0.6769	0.102608	0.628521	0.988541	0.532431	0.440892	0.711049	0.474328	0.646738	0.844721	0.663533	0.283142	0.745792	0.615805	0.221653	0.743676	0.578444	0.501806	0.350129	0.363252	0.301942	0.790623	0.938233	0.302916	0.333595	0.330397	0.184294	0.097953	0.0965211	0.137428	0.101184	0.0933168	0.179733	0.31654	0.294047	0.260169	0.299544	0.293015
rs15013661	EXOC4	416700	1	1530565	intron-variant	ss538285633	AX-75301246	C/T	0.632577	0.796322	0.25588	0.99436	0.955291	0.660738	0.265873	0.670358	0.917436	0.688915	0.0405043	0.653547	0.308005	0.499577	0.115385	0.0744339	0.0563381	0.429932	0.0747896	0.949906	0.671233	0.990784	0.276956	0.640242	0.193843	0.717409	0.762685	0.693165	0.686854	0.659647	0.517024	0.538342	0.471183	0.36468	0.505246	0.399421	0.800162	0.775864	0.767146	0.775366	0.732617
rs316585145	EXOC4	416700	1	1532477	intron-variant	ss538123827	AX-75301659	C/T	0.908404	0.289611	0.337101	0.353592	0.845017	0.499629	0.401492	0.439075	0.293728	0.603047	0.823958	0.43058	0.161139	0.711235	0.141488	0.418227	0.707321	0.0163614	0.418189	0.861114	0.0808919	0.531916	0.0350666	0.636508	0.491472	0.486911	0.620029	0.424074	0.420472	0.678262	0.686479	0.586785	0.525713	0.506357	0.33142	0.434477	0.196822	0.284591	0.256968	0.248941	0.291178
rs315701887	EXOC4	416700	1	1533122	intron-variant	ss537977308	AX-75301804	A/G	0.826227	0.428395	0.932696	0.605955	0.621836	0.628223	0.0986	0.45316	0.103628	0.600582	0.735788	0.449644	0.26645	0.666146	0.774506	0.48678	0.904315	0.315365	0.485073	0.610531	0.879397	0.697653	0.572475	0.855446	0.476824	0.25081	0.866026	0.928299	0.926338	0.675954	0.612983	0.795661	0.663546	0.400163	0.721581	0.611468	0.837863	0.830886	0.863755	0.911387	0.954598
rs316256039	EXOC4	416700	1	1533185	intron-variant	ss537955352	AX-75301820	A/G	0.697617	0.413719	0.672789	0.641603	0.125787	0.754386	0.856341	0.333506	0.284354	0.41205	0.826517	0.440636	0.731093	0.717582	0.513288	0.938891	0.895725	0.565233	0.940881	0.613956	0.0917798	0.152717	0.788786	0.736617	0.885029	0.209941	0.31867	0.288871	0.283756	0.164932	0.096869	0.146241	0.10987	0.0356034	0.059567	0.077035	0.113554	0.138922	0.132332	0.151659	0.165504
rs313535940	EXOC4	416700	1	1533864	intron-variant	ss538001297	AX-75301986	A/G	0.223076	0.37012	0.325347	0.584552	0.400264	0.735307	0.662321	0.716875	0.676886	0.855327	0.45334	0.824458	0.801691	0.489585	0.494269	0.625318	0.68848	0.681323	0.623351	0.426063	0.0491275	0.451507	0.270016	0.729752	0.260847	0.666028	0.6695	0.59309	0.599411	0.561637	0.473259	0.495914	0.428112	0.252999	0.317945	0.243082	0.413544	0.409129	0.36856	0.361321	0.35703
rs314386258	EXOC4	416700	1	1537608	intron-variant	ss538042792	AX-75302774	A/G	0.243337	0.31085	0.65178	0.650911	0.580797	0.453363	0.665704	0.969615	0.63819	0.93673	0.843787	0.958096	0.738005	0.911121	0.533782	0.0508112	0.215727	0.733445	0.050789	0.674111	0.983587	0.706782	0.73637	0.337539	0.108522	0.444725	0.474148	0.47514	0.45647	0.356575	0.456285	0.492962	0.350434	0.318846	0.322626	0.465741	0.251919	0.298829	0.357347	0.39568	0.410925
rs15013691	EXOC4	416700	1	1538197	intron-variant	ss538217412	AX-75302908	G/T	0.664856	0.443658	0.677405	0.538791	0.634961	0.378935	0.112649	0.78867	0.0477918	0.456831	0.995493	0.339155	0.091761	0.655512	0.241676	0.985059	0.439861	0.0947247	0.987175	0.523332	0.536496	0.736288	0.540119	0.600086	0.428965	0.538619	0.77345	0.971996	0.961387	0.54022	0.466962	0.677905	0.530441	0.295114	0.544721	0.455636	0.672253	0.676012	0.732412	0.796654	0.841221
rs315167629	EXOC4	416700	1	1538757	intron-variant	ss538065254	AX-75303027	A/G	0.940696	0.379013	0.929372	0.43986	0.259605	0.936713	0.391018	0.182056	0.358427	0.946202	0.430293	0.736654	0.0944549	0.794466	0.770395	0.208906	0.346232	0.523983	0.208845	0.6089	0.314732	0.674661	0.431867	0.670654	0.936847	0.3745	0.968058	0.89263	0.878344	0.773337	0.704602	0.752667	0.892285	0.730793	0.866339	0.791232	0.596793	0.766602	0.823339	0.818455	0.963629
rs13778942	EXOC4	416700	1	1542432	intron-variant	ss538220148	AX-75303877	C/T	0.0749636	0.391128	0.362115	0.481046	0.209139	0.398929	0.549099	0.485254	0.699315	0.442256	0.621585	0.590887	0.674381	0.97141	0.415592	0.330927	0.480198	0.751594	0.329535	0.345337	0.0315959	0.528012	0.106614	0.347814	0.417611	0.888176	0.615753	0.744354	0.719701	0.729262	0.790947	0.742309	0.757019	0.992876	0.988162	0.971134	0.792455	0.841141	0.935509	0.972016	0.96698
rs318211951	EXOC4	416700	1	1542985	intron-variant	ss537985462	AX-75303991	C/T	0.417157	0.943613	0.573396	0.386975	0.863002	0.291002	0.266078	0.241869	0.611005	0.519286	0.283409	0.665863	0.643877	0.908998	0.325485	0.254632	0.813182	0.105743	0.252762	0.583127	0.203531	0.719561	0.0111472	0.263059	0.708061	0.646932	0.384943	0.450789	0.448145	0.368912	0.318474	0.235064	0.274728	0.265818	0.207506	0.346509	0.26957	0.315482	0.284722	0.320693	0.39122
rs314446304	EXOC4	416700	1	1549705	intron-variant	ss537990649	AX-75305442	C/T	0.978978	0.64647	0.973989	0.510962	0.105969	0.847983	0.948841	0.329898	0.458564	0.425718	0.313214	0.360107	0.829094	0.802801	0.34409	0.618373	0.748319	0.213573	0.616335	0.597905	0.444225	0.30492	0.597338	0.184029	0.917142	0.847872	0.397571	0.439369	0.432647	0.25107	0.138902	0.13522	0.186436	0.139654	0.125737	0.232732	0.396785	0.374135	0.336585	0.385729	0.381459
rs317448784	EXOC4	416700	1	1554524	intron-variant	ss537932203	AX-75306521	A/G	0.202779	0.632243	0.928072	0.272229	0.126724	0.107674	0.795216	0.471028	0.358342	0.504368	0.438518	0.393286	0.0122281	0.330977	0.963506	0.445234	0.660349	0.43407	0.441838	0.200857	0.599245	0.537759	0.161992	0.890867	0.949957	0.766303	0.984826	0.95849	0.927419	0.928131	0.832708	0.908101	0.901511	0.840578	0.886071	0.770314	0.916572	0.929187	0.810293	0.777165	0.790646
rs313681896	EXOC4	416700	1	1556371	intron-variant	ss538166860	AX-75306945	A/G	0.617291	0.865579	0.869721	0.418353	0.501843	0.949358	0.130691	0.803169	0.977159	0.122636	0.2599	0.197712	0.592573	0.585987	0.506489	0.55727	0.422482	0.638829	0.558912	0.36712	0.215083	0.535671	0.022194	0.40102	0.119986	0.436239	0.489034	0.494865	0.474673	0.298463	0.312698	0.438706	0.333982	0.239769	0.414728	0.40531	0.457647	0.425506	0.504647	0.544607	0.458292
rs13778959	EXOC4	416700	1	1558388	intron-variant	ss538145478	AX-75307441	C/T	0.846369	0.889515	0.862523	0.344737	0.125421	0.543303	0.00983784	0.227898	0.226614	0.0892126	0.45497	0.0474823	0.00305395	0.0105786	0.90326	0.0200464	0.0597303	0.152097	0.0200402	0.560828	0.297023	0.365144	0.834082	0.276076	0.481596	0.773336	0.680979	0.564599	0.551172	0.551837	0.574034	0.571979	0.517644	0.56233	0.50564	0.738939	0.614471	0.516101	0.550317	0.567426	0.500071
rs313892219	EXOC4	416700	1	1562973	intron-variant	ss537866944	AX-75308540	C/T	0.373194	0.977799	0.631866	0.214998	0.316094	0.447956	0.135758	0.183809	0.922767	0.945018	0.673253	0.72747	0.21858	0.967493	0.143531	0.0861614	0.0883946	0.482767	0.0861627	0.199318	0.726642	0.866903	0.379433	0.910124	0.573326	0.283779	0.968289	0.938353	0.890995	0.77609	0.556192	0.710552	0.402438	0.248973	0.436643	0.347442	0.630963	0.679065	0.761409	0.837912	0.808191
rs315124340	EXOC4	416700	1	1565149	intron-variant	ss538038890	AX-80814239	C/G	0.962709	0.678635	0.905979	0.158207	0.322678	0.410246	0.0571398	0.0851797	0.830516	0.101058	0.253061	0.317422	0.257473	0.908244	0.0700481	0.24295	0.0783968	0.188831	0.241895	0.977927	0.0593172	0.996708	0.000556019	0.159079	0.704459	0.868185	0.994458	0.872537	0.885973	0.972079	0.957468	0.954407	0.786543	0.73886	0.700924	0.705433	0.791969	0.725492	0.67013	0.645083	0.68376
rs312796953	EXOC4	416700	1	1566467	intron-variant	ss537975306	AX-75309212	C/T	0.239068	0.853951	0.206043	0.168162	0.599267	0.238253	0.0233354	0.307989	0.501871	0.0112689	0.313391	0.0446331	0.29409	0.866978	0.222377	0.677982	0.339108	0.239384	0.68015	0.542677	0.206174	0.660023	0.000934748	0.26931	0.717892	0.828247	0.296192	0.372971	0.386281	0.271873	0.305175	0.209689	0.221936	0.196464	0.15782	0.217585	0.223086	0.18141	0.14098	0.145011	0.158054
rs313584285	EXOC4	416700	1	1567770	intron-variant	ss537733799	AX-75309460	C/T	0.861517	0.492679	0.723236	0.629692	0.769463	0.349599	0.0925526	0.288434	0.51219	0.551778	0.238075	0.707876	0.183601	0.578683	0.501293	0.775881	0.945226	0.299937	0.773497	0.625021	0.205862	0.719246	0.0198527	0.623813	0.69366	0.848123	0.920884	0.922751	0.890543	0.56805	0.501284	0.627361	0.383316	0.228537	0.32766	0.382446	0.583444	0.5782	0.630329	0.712669	0.617487
rs15013723	EXOC4	416700	1	1571722	intron-variant	ss537988422	AX-75310304	A/G	0.216627	0.994713	0.349061	0.216842	0.909522	0.133798	0.0386709	0.668184	0.550485	0.0785762	0.395267	0.150235	0.805949	0.831021	0.441543	0.805684	0.577254	0.552919	0.803624	0.693927	0.897574	0.612773	0.00387003	0.677256	0.122481	0.693745	0.872235	0.856878	0.872772	0.603064	0.689751	0.718184	0.534951	0.360261	0.420259	0.541963	0.756326	0.604413	0.577666	0.618878	0.499585
rs312956001	EXOC4	416700	1	1572730	intron-variant	ss538282315	AX-75310542	C/T	0.793705	0.319069	0.915274	0.442678	0.964708	0.927306	0.00469271	0.263692	0.174867	0.0297289	0.299651	0.066923	0.290229	0.508913	0.462194	0.307234	0.24267	0.943103	0.305902	0.837086	0.229517	0.961001	0.0246989	0.442239	0.718445	0.960845	0.915976	0.951796	0.963931	0.686125	0.674817	0.83051	0.634357	0.423775	0.561187	0.544221	0.668106	0.673593	0.647991	0.669452	0.685201
rs13778967	EXOC4	416700	1	1573382	intron-variant	ss538281229	AX-75310683	A/G	0.793705	0.319069	0.915274	0.442678	0.964708	0.927306	0.00471462	0.263692	0.174867	0.0297289	0.268677	0.066923	0.290229	0.508913	0.462194	0.307234	0.24267	0.943103	0.305902	0.837086	0.229517	0.961001	0.0246989	0.442239	0.765181	0.960845	0.907554	0.94313	0.953349	0.674674	0.661777	0.814177	0.612703	0.402	0.532878	0.515562	0.639025	0.645974	0.624319	0.648902	0.667397
rs315429908	EXOC4	416700	1	1579374	intron-variant	ss537952351	AX-75311890	C/T	0.429402	0.715767	0.581604	0.952815	0.686184	0.836459	0.106824	0.634728	0.21668	0.509078	0.522897	0.352783	0.0888608	0.866807	0.898451	0.923077	0.87051	0.708546	0.923013	0.813053	0.353159	0.983603	0.629525	0.373266	0.162139	0.785304	0.500135	0.717537	0.702789	0.286871	0.22153	0.334893	0.280741	0.160183	0.284325	0.278639	0.400107	0.439283	0.462207	0.536943	0.498868
rs318046520	EXOC4	416700	1	1643107	intron-variant	ss538261148	AX-75323744	C/T	0.611422	0.551587	0.354207	0.921364	0.229926	0.803971	0.41401	0.450965	0.724051	0.535509	0.159303	0.765247	0.330198	0.0977595	0.586423	0.878699	0.466585	0.575254	0.878724	0.994518	0.48734	0.969274	0.766175	0.119088	0.751111	0.224562	0.0981211	0.0671087	0.0633951	0.102049	0.134295	0.119432	0.10241	0.0949094	0.111636	0.108441	0.0681174	0.0906286	0.109734	0.110273	0.143468
rs314915670	EXOC4	416700	1	1645436	intron-variant	ss537974364	AX-75324227	A/G	0.194906	0.630242	0.299696	0.385511	0.0148404	0.548985	0.0800623	0.687124	0.889614	0.21533	0.743758	0.17826	0.667593	0.851923	0.674834	0.635207	0.638953	0.279996	0.635225	0.651161	0.0816395	0.165734	0.700086	0.273462	0.355473	0.739473	0.972375	0.775894	0.781108	0.846511	0.713246	0.794805	0.843667	0.72192	0.53736	0.721841	0.617528	0.706779	0.64169	0.636946	0.620133
rs312717945	EXOC4	416700	1	1647119	intron-variant	ss538052819	AX-75324594	A/G	0.221186	0.156043	0.945316	0.492269	0.0844692	0.29033	0.516019	0.886923	0.735017	0.830435	0.0821083	0.94255	0.330758	0.479624	0.44017	0.0745787	0.133131	0.842011	0.0750407	0.451875	0.137237	0.615127	0.642994	0.423672	0.637362	0.459384	0.79891	0.69992	0.677778	0.823903	0.745849	0.735118	0.6111	0.62942	0.8008	0.829496	0.77501	0.869736	0.750746	0.697194	0.657918
rs14081518	EXOC4	416700	1	1648842	intron-variant	ss537925987	AX-75325001	C/T	0.444105	0.0451585	0.279519	0.685686	0.36684	0.694311	0.805361	0.824208	0.70609	0.259602	0.307172	0.34154	0.593452	0.896041	0.974399	0.478075	0.656256	0.641744	0.479824	0.687788	0.348776	0.475751	0.380487	0.857001	0.902147	0.481428	0.980355	0.89602	0.875921	0.664093	0.830717	0.975029	0.739853	0.489582	0.70158	0.548843	0.415813	0.490703	0.505186	0.488769	0.369665
rs313907637	EXOC4	416700	1	1649520	intron-variant	ss538151361	AX-80862072	C/G	0.539932	0.518708	0.11945	0.943327	0.437066	0.191599	0.277377	0.454609	0.14996	0.258411	0.597605	0.226975	0.0332125	0.187037	0.724558	0.22233	0.414897	0.149145	0.222314	0.420473	0.0463589	0.300126	0.0390303	0.687482	0.897614	0.590471	0.787365	0.725205	0.692773	0.689242	0.588277	0.415257	0.407506	0.385227	0.205826	0.316257	0.421981	0.416162	0.388864	0.417875	0.258444
rs312325037	EXOC4	416700	1	1654609	intron-variant	ss537869027	AX-75326343	C/T	0.192871	0.0408539	0.878825	0.842494	0.783058	0.171575	0.0237644	0.474584	0.233512	0.269525	0.533388	0.238387	0.286246	0.441238	0.997757	0.966152	0.690096	0.945482	0.962229	0.269088	0.425506	0.478455	0.260981	0.780855	0.719586	0.703073	0.640613	0.520093	0.527848	0.846149	0.760166	0.495289	0.619544	0.813351	0.445097	0.664264	0.820897	0.648666	0.585241	0.553529	0.464656
rs14081527	EXOC4	416700	1	1656486	intron-variant	ss537833190	AX-75326781	C/T	0.928262	0.971141	0.077533	0.912379	0.345519	0.716017	0.168765	0.723703	0.285496	0.366063	0.449794	0.198645	0.172602	0.567542	0.34348	0.447858	0.885351	0.0760024	0.447833	0.330925	0.018104	0.230683	0.0844057	0.214589	0.907262	0.762484	0.663857	0.547011	0.528715	0.641997	0.488571	0.363214	0.372516	0.354645	0.166592	0.283061	0.236263	0.292342	0.25638	0.264857	0.252681
rs313717326	EXOC4	416700	1	1658694	intron-variant	ss538199538	AX-75327320	A/G	0.953521	0.98901	0.146536	0.912643	0.207888	0.401564	0.101769	0.915238	0.172712	0.285448	0.648895	0.154448	0.0670881	0.198983	0.534566	0.14064	0.3988	0.0682856	0.140629	0.42775	0.0292904	0.169531	0.0600087	0.217884	0.728521	0.541466	0.780583	0.654393	0.639799	0.670328	0.635261	0.464702	0.456692	0.435622	0.224675	0.387032	0.380021	0.360922	0.320889	0.325484	0.236275
rs313238655	EXOC4	416700	1	1659242	intron-variant	ss537906843	AX-75327441	A/G	0.230334	0.833269	0.95027	0.919884	0.888622	0.0991926	0.155404	0.543482	0.246745	0.0342639	0.227935	0.0861912	0.48475	0.850699	0.830693	0.270205	0.709707	0.459108	0.270246	0.610309	0.221434	0.530169	0.65269	0.539897	0.57894	0.312238	0.526783	0.442212	0.449464	0.446867	0.814548	0.589338	0.614383	0.638841	0.781849	0.828386	0.851843	0.653957	0.682751	0.655044	0.479234
rs15013787	EXOC4	416700	1	1661138	intron-variant	ss537813662	AX-75327894	C/T	0.198298	0.202687	0.266308	0.537727	0.864809	0.0153141	0.787238	0.521493	0.734465	0.974552	0.0301415	0.627656	0.160061	0.0730265	0.397827	0.790705	0.678289	0.235578	0.790795	0.232529	0.320344	0.961881	0.159658	0.152784	0.409925	0.212987	0.575476	0.505885	0.519813	0.344793	0.500433	0.487173	0.406576	0.570147	0.628306	0.853564	0.781303	0.786263	0.815956	0.810431	0.602773
rs313174443	EXOC4	416700	1	1664487	intron-variant	ss538272496	AX-75328687	A/G	0.663759	0.901845	0.555916	0.47571	0.34453	0.241448	0.119704	0.67335	0.932493	0.885856	0.0429547	0.942285	0.913014	0.527052	0.826335	0.805446	0.541815	0.852544	0.805352	0.240757	0.832028	0.482154	0.760013	0.869755	0.12116	0.619521	0.989351	0.947358	0.954558	0.931069	0.780696	0.740214	0.837431	0.735421	0.454127	0.631077	0.639172	0.701242	0.638787	0.667885	0.737181
rs15745063	EXOC4	416700	1	1665401	intron-variant	ss538043652	AX-75328895	C/T	0.862362	0.923135	0.648522	0.788822	0.54082	0.375509	0.465141	0.634591	0.505775	0.132369	0.532196	0.133818	0.555594	0.78627	0.352145	0.632201	0.525154	0.247935	0.630241	0.147029	0.382225	0.533407	0.992296	0.665582	0.0844999	0.995265	0.835852	0.849273	0.841279	0.957404	0.935979	0.825758	0.998439	0.910238	0.817753	0.926234	0.873838	0.915641	0.893656	0.940467	0.889222
rs316985723	EXOC4	416700	1	1665535	intron-variant	ss537978612	AX-75328933	G/T	0.50997	0.969344	0.275281	0.563103	0.112898	0.745053	0.0545788	0.966585	0.497986	0.142901	0.188657	0.0887952	0.567044	0.723248	0.533319	0.86147	0.947836	0.358846	0.859295	0.793064	0.209364	0.150691	0.697014	0.509654	0.909085	0.513175	0.868143	0.858318	0.84737	0.986629	0.829507	0.908632	0.841645	0.840131	0.628788	0.702187	0.758862	0.773937	0.729175	0.711988	0.618417
rs316769393	EXOC4	416700	1	1666835	intron-variant	ss538061328	AX-75329244	A/G	0.162351	0.0660055	0.635363	0.795636	0.828013	0.391547	0.186678	0.22764	0.527942	0.424928	0.348757	0.416932	0.373974	0.310073	0.716872	0.924944	0.892112	0.756383	0.92497	0.541029	0.313675	0.603215	0.817173	0.761269	0.0800618	0.720668	0.446622	0.474943	0.455423	0.403603	0.248678	0.175235	0.213806	0.216783	0.113158	0.240608	0.49669	0.394922	0.380789	0.430843	0.330349
rs315267254	EXOC4	416700	1	1671789	intron-variant	ss537971607	AX-75330477	C/T	0.521968	0.500447	0.445095	0.821153	0.388201	0.839253	0.296465	0.963099	0.410598	0.0923077	0.850981	0.148597	0.642842	0.689734	0.799319	0.916559	0.818873	0.480098	0.918672	0.324596	0.20208	0.39163	0.666496	0.865009	0.115441	0.783799	0.608056	0.864359	0.871572	0.737038	0.607491	0.551362	0.657976	0.661402	0.597042	0.76867	0.809693	0.772608	0.765141	0.815376	0.999555
rs314498035	EXOC4	416700	1	1676125	intron-variant	ss537927040	AX-75331511	A/G	0.611426	0.40819	0.533602	0.609401	0.306117	0.348957	0.707744	0.641756	0.488394	0.374054	0.955836	0.233073	0.891866	0.707497	0.0405648	0.666229	0.428087	0.0104693	0.666278	0.88049	0.172261	0.186025	0.0704861	0.173823	0.390499	0.530496	0.606418	0.45434	0.458094	0.446133	0.38594	0.341394	0.390842	0.278041	0.187081	0.234767	0.298337	0.328805	0.276421	0.281805	0.227684
rs313555077	EXOC4	416700	1	1676822	intron-variant	ss537955927	AX-75331698	A/G	0.526971	0.0919271	0.790875	0.958388	0.993955	0.951992	0.537791	0.58017	0.979437	0.842731	0.0927889	0.991057	0.319278	0.190401	0.395452	0.665698	0.507168	0.533027	0.665745	0.469066	0.827493	0.758109	0.697197	0.988978	0.209753	0.574419	0.491914	0.573548	0.559146	0.51159	0.227152	0.225169	0.259371	0.256353	0.12736	0.224948	0.410125	0.402441	0.378453	0.432815	0.425168
rs315173552	EXOC4	416700	1	1677401	intron-variant	ss537772251	AX-75331852	A/C	0.321844	0.1372	0.801614	0.788046	0.510805	0.934962	0.768713	0.731565	0.866631	0.968367	0.862819	0.811346	0.410315	0.904816	0.240075	0.454811	0.187406	0.611362	0.454811	0.468982	0.116811	0.959321	0.916988	0.796809	0.268763	0.746836	0.31888	0.339456	0.345031	0.344991	0.269388	0.221679	0.314802	0.241306	0.192822	0.246849	0.347461	0.33607	0.315826	0.330248	0.390261
rs316150199	EXOC4	416700	1	1680204	intron-variant	ss538045606	AX-75332583	A/C	0.605127	0.503088	0.987385	0.910005	0.878559	0.879313	0.756443	0.912275	0.899819	0.446524	0.595674	0.587663	0.660709	0.606839	0.557572	0.456788	0.975815	0.462795	0.455282	0.149989	0.876895	0.726406	0.207419	0.592258	0.342833	0.65716	0.583329	0.73345	0.741495	0.624508	0.479679	0.360507	0.528949	0.358225	0.225943	0.332647	0.356604	0.411333	0.349013	0.386546	0.444431
rs318107033	EXOC4	416700	1	1683248	intron-variant	ss538119080	AX-75333324	C/T	0.839042	0.717868	0.183347	0.634295	0.617758	0.285962	0.712309	0.784938	0.868618	0.523578	0.565692	0.641322	0.186284	0.823256	0.626417	0.830762	0.59815	0.998124	0.830815	0.0790237	0.769312	0.725058	0.926452	0.889775	0.68692	0.895766	0.349297	0.455365	0.437873	0.38435	0.285475	0.221107	0.294908	0.161789	0.142653	0.109349	0.156724	0.199064	0.183444	0.191441	0.230939
rs14081552	EXOC4	416700	1	1685512	intron-variant	ss537839997	AX-75333875	C/T	0.992541	0.357506	0.0679925	0.873452	0.927178	0.992378	0.142361	0.437484	0.741715	0.702795	0.910511	0.946973	0.784464	0.803128	0.100371	0.919511	0.177714	0.103398	0.92373	0.523667	0.455679	0.732186	0.194891	0.39184	0.842494	0.842947	0.434552	0.567268	0.52984	0.269707	0.193244	0.182409	0.168642	0.0674179	0.0902222	0.075071	0.126223	0.191229	0.192357	0.230305	0.210512
rs315500364	EXOC4	416700	1	1685869	intron-variant	ss537903062	AX-75333969	C/T	0.962686	0.729178	0.266215	0.467915	0.916867	0.59126	0.956486	0.592798	0.569669	0.679774	0.782209	0.809248	0.437053	0.544699	0.851248	0.535977	0.800922	0.87529	0.535932	0.0986431	0.816031	0.534021	0.710613	0.937436	0.401255	0.813699	0.454886	0.578826	0.565136	0.417284	0.416462	0.290786	0.375138	0.207954	0.19023	0.161909	0.27566	0.249451	0.229429	0.23486	0.201299
rs315673094	EXOC4	416700	1	1689043	intron-variant	ss538215226	AX-75334675	A/G	0.810498	0.242229	0.177634	0.814768	0.182624	0.974328	0.0517492	0.481772	0.635359	0.299631	0.122183	0.398889	0.567669	0.671585	0.345163	0.335884	0.0608984	0.751242	0.33859	0.920513	0.357402	0.376243	0.783673	0.95457	0.423522	0.428928	0.182256	0.307817	0.273733	0.119658	0.0923346	0.108813	0.0717613	0.0483765	0.110182	0.0891319	0.134147	0.167186	0.215249	0.256569	0.312859
rs15745117	EXOC4	416700	1	1691129	intron-variant	ss538140468	AX-75335190	A/G	0.511674	0.138216	0.405964	0.877774	0.978789	0.977534	0.878662	0.57784	0.667588	0.964036	0.113701	0.642179	0.331011	0.276295	0.224565	0.207336	0.151114	0.634154	0.207344	0.311294	0.423118	0.78881	0.597631	0.285963	0.592932	0.948296	0.334114	0.47969	0.454099	0.392247	0.132417	0.10439	0.1284	0.128824	0.0805406	0.1058	0.269223	0.277344	0.246027	0.276841	0.289638
rs314989591	EXOC4	416700	1	1692619	intron-variant	ss537903289	AX-75335489	C/T	0.146602	0.698077	0.296229	0.209967	0.642429	0.0881876	0.377494	0.526799	0.378018	0.574261	0.658936	0.578541	0.236694	0.341791	0.109479	0.851231	0.173149	0.0748202	0.851272	0.117743	0.878177	0.760467	0.598162	0.792412	0.364714	0.544234	0.298035	0.297644	0.29218	0.177384	0.126965	0.167581	0.121973	0.0917849	0.117593	0.174138	0.156566	0.226604	0.230537	0.26805	0.268553
rs14081562	EXOC4	416700	1	1696923	intron-variant	ss538232953	AX-75336447	C/T	0.293813	0.103065	0.714104	0.474336	0.397078	0.095667	0.670604	0.571381	0.73577	0.309009	0.852684	0.17473	0.108655	0.370174	0.0340379	0.948536	0.227891	0.00957632	0.948475	0.609292	0.152389	0.358658	0.0476958	0.208829	0.497901	0.619857	0.43431	0.317125	0.307525	0.300932	0.157052	0.164439	0.140658	0.165647	0.0877812	0.168928	0.278604	0.275432	0.253989	0.279861	0.220733
rs315722992	EXOC4	416700	1	1700051	intron-variant	ss537995995	AX-75337202	C/T	0.793249	0.542031	0.728364	0.725078	0.597213	0.710951	0.305302	0.558683	0.947179	0.389296	0.151804	0.51458	0.0213595	0.414358	0.737269	0.735091	0.587197	0.857622	0.735044	0.758856	0.184055	0.827576	0.852896	0.445451	0.971049	0.631978	0.99195	0.987367	0.975926	0.965514	0.705467	0.741716	0.623097	0.809643	0.628984	0.776264	0.843415	0.904696	0.922702	0.980422	0.889076
rs317329452	EXOC4	416700	1	1702572	intron-variant	ss537842552	AX-75337757	A/G	0.0637077	0.237245	0.844245	0.618576	0.326872	0.0308348	0.982485	0.905316	0.926161	0.200227	0.948386	0.199186	0.492221	0.343932	0.0606909	0.657607	0.296506	0.0198927	0.657626	0.433596	0.976718	0.312711	0.243009	0.748771	0.677315	0.743467	0.104331	0.0972988	0.0918485	0.0296569	0.0157024	0.0193014	0.013112	0.00878584	0.0101367	0.025029	0.0716028	0.0620592	0.0606985	0.0791093	0.0425918
rs316364573	EXOC4	416700	1	1704915	intron-variant	ss538031936	AX-75338290	A/C	0.793249	0.542031	0.728364	0.725078	0.597213	0.710951	0.282903	0.558683	0.947179	0.389296	0.167198	0.51458	0.0213595	0.414358	0.737269	0.735091	0.587197	0.857622	0.735044	0.758856	0.184055	0.827576	0.852896	0.445451	0.980251	0.631978	0.985357	0.967562	0.991499	0.954566	0.71046	0.744664	0.62291	0.808649	0.630079	0.781532	0.856566	0.92727	0.95485	0.977297	0.939121
rs313305009	EXOC4	416700	1	1705055	intron-variant	ss537952460	AX-80917184	C/G	0.611426	0.40819	0.533602	0.609401	0.306117	0.348957	0.730271	0.641756	0.488394	0.374054	0.930784	0.233073	0.891866	0.707497	0.0405648	0.666229	0.428087	0.0104693	0.666278	0.88049	0.172261	0.186025	0.0704861	0.173823	0.414069	0.530496	0.597606	0.446418	0.449977	0.437608	0.377743	0.333449	0.381768	0.27098	0.181921	0.229039	0.291978	0.321944	0.270015	0.2749	0.221661
rs15745216	EXOC4	416700	1	1707475	intron-variant	ss537816376	AX-75338859	A/C	0.0782212	0.0298789	0.125316	0.476396	0.314328	0.189165	0.974771	0.643322	0.512389	0.802504	0.350546	0.694395	0.805146	0.390934	0.234649	0.814294	0.602468	0.221182	0.816282	0.721213	0.469236	0.338898	0.161641	0.355104	0.7642	0.950826	0.191512	0.229376	0.237596	0.163419	0.0548825	0.0483637	0.0703905	0.0710556	0.0344344	0.105215	0.187685	0.175061	0.129733	0.152546	0.160518
rs313585521	EXOC4	416700	1	1708809	intron-variant	ss537840118	AX-75339186	C/T	0.0537999	0.045692	0.208471	0.493046	0.517183	0.157966	0.937295	0.813822	0.444333	0.659235	0.472412	0.627033	0.973376	0.699818	0.173177	0.777412	0.455399	0.160835	0.779393	0.719024	0.606331	0.330904	0.184656	0.647435	0.733311	0.660704	0.0767925	0.0866795	0.0899576	0.0660969	0.0202091	0.0170985	0.0249651	0.0248976	0.0114213	0.0411435	0.0704979	0.0685502	0.049231	0.0592884	0.0656022
rs315946966	EXOC4	416700	1	1710611	intron-variant	ss537883358	AX-75339618	C/T	0.611426	0.40819	0.533602	0.609401	0.306117	0.348957	0.62004	0.641756	0.488394	0.374054	0.896101	0.233073	0.891866	0.707497	0.0405648	0.666229	0.428087	0.0104693	0.666278	0.88049	0.172261	0.186025	0.0704861	0.173823	0.416795	0.530496	0.554419	0.407331	0.409544	0.39884	0.341983	0.302069	0.350477	0.246938	0.163454	0.207516	0.264979	0.292901	0.246461	0.252186	0.201742
rs317310722	EXOC4	416700	1	1713492	intron-variant	ss538010709	AX-75340298	A/G	0.232204	0.16317	0.506672	0.50529	0.665396	0.0862319	0.393892	0.76117	0.833724	0.229366	0.718799	0.153587	0.213562	0.723831	0.0240939	0.989839	0.155553	0.00646412	0.989772	0.618863	0.242906	0.363023	0.0653861	0.474909	0.524542	0.930887	0.213196	0.131569	0.124691	0.141189	0.0715118	0.0714645	0.0563235	0.0666628	0.0331816	0.0703161	0.111369	0.121344	0.115092	0.130232	0.106729
rs314943727	EXOC4	416700	1	1716656	intron-variant	ss538253769	AX-75341009	C/T	0.29518	0.615194	0.858475	0.642648	0.297179	0.41343	0.425972	0.697597	0.916666	0.493003	0.536436	0.483527	0.438091	0.759149	0.109826	0.912148	0.329027	0.105515	0.912146	0.887233	0.982967	0.339807	0.547436	0.543607	0.941837	0.781945	0.272318	0.294549	0.292481	0.121351	0.0840146	0.0998631	0.108094	0.0426502	0.0586655	0.0704237	0.123763	0.149531	0.129469	0.15204	0.116298
rs316488985	EXOC4	416700	1	1722632	intron-variant	ss537890112	AX-75342445	C/T	0.0814089	0.240361	0.996147	0.490236	0.502399	0.0844712	0.76063	0.747474	0.688008	0.267968	0.694756	0.262962	0.793553	0.738392	0.0321047	0.832731	0.0931894	0.0260658	0.83271	0.490597	0.934648	0.416683	0.334708	0.783169	0.885703	0.542107	0.0607676	0.0569354	0.0531296	0.0206938	0.00673612	0.0102475	0.00695587	0.00444547	0.00489025	0.0113922	0.0285938	0.0351895	0.0341678	0.0467722	0.0354051
rs15013807	EXOC4	416700	1	1726170	intron-variant	ss538219401	AX-75343337	C/T	0.491341	0.586831	0.333705	0.656334	0.62714	0.322258	0.55862	0.891557	0.608385	0.274603	0.594477	0.211164	0.806972	0.782293	0.0301565	0.637475	0.294637	0.00776427	0.63753	0.883631	0.311243	0.203946	0.107912	0.515208	0.336985	0.919624	0.292288	0.180368	0.179137	0.198277	0.179976	0.148615	0.16724	0.107028	0.0700355	0.09111	0.104924	0.130284	0.111895	0.114101	0.0970345
rs316304252	EXOC4	416700	1	1728064	intron-variant	ss538156053	AX-75343839	G/T	0.0604304	0.219161	0.925117	0.4457	0.567023	0.061276	0.739722	0.721559	0.73851	0.221144	0.808891	0.224805	0.821172	0.691728	0.0335012	0.794803	0.0902824	0.0303537	0.794795	0.520814	0.831532	0.382341	0.395964	0.894014	0.976427	0.452488	0.0599032	0.0560109	0.0520313	0.0204138	0.00659508	0.0100511	0.00674989	0.00428815	0.00472357	0.010985	0.0274718	0.0337383	0.0326573	0.0447321	0.0339388
rs14081589	EXOC4	416700	1	1729920	intron-variant	ss537764194	AX-75344280	A/C	0.247286	0.11311	0.43773	0.599128	0.663862	0.137009	0.76325	0.554233	0.422021	0.340244	0.935636	0.356342	0.596921	0.668267	0.103707	0.868759	0.456913	0.0428907	0.868807	0.849379	0.247687	0.370044	0.0481514	0.755353	0.277619	0.607016	0.63988	0.559158	0.546089	0.499373	0.376853	0.323274	0.36743	0.261035	0.190699	0.20029	0.37137	0.417988	0.377097	0.409912	0.273437
rs317251263	EXOC4	416700	1	1731537	intron-variant	ss538137241	AX-80843479	C/G	0.178837	0.905419	0.415884	0.601495	0.609016	0.310417	0.0869058	0.941483	0.140494	0.417231	0.466515	0.357826	0.113668	0.784759	0.394281	0.761339	0.182977	0.612112	0.76136	0.527222	0.145909	0.609665	0.819079	0.507663	0.422211	0.592432	0.0810405	0.118297	0.114784	0.030503	0.0206646	0.0424947	0.025492	0.0152121	0.0388627	0.0497013	0.0925008	0.0853463	0.0983593	0.120693	0.127745
rs13778992	EXOC4	416700	1	1731679	intron-variant	ss538077404	AX-75344705	A/G	0.417157	0.943613	0.573396	0.386975	0.863002	0.291002	0.431363	0.241869	0.611005	0.519286	0.296032	0.665863	0.750595	0.964851	0.325485	0.254632	0.813182	0.105743	0.252762	0.589996	0.203531	0.719561	0.0111472	0.263059	0.873363	0.646932	0.488777	0.568929	0.575279	0.491482	0.439656	0.335527	0.390199	0.381419	0.310169	0.491441	0.389382	0.441819	0.398865	0.43862	0.51973
rs317769576	EXOC4	416700	1	1731845	intron-variant	ss537957177	AX-75344748	C/T	0.860501	0.0867882	0.560195	0.569036	0.194114	0.629519	0.363085	0.207148	0.844669	0.748439	0.943354	0.885635	0.972568	0.414556	0.54244	0.160637	0.0940133	0.942633	0.16146	0.128603	0.241976	0.400561	0.170566	0.756953	0.626894	0.183144	0.740831	0.793633	0.751958	0.691043	0.682269	0.872402	0.585058	0.610339	0.953116	0.778087	0.635565	0.741436	0.869455	0.885545	0.964211
rs14081598	EXOC4	416700	1	1733962	intron-variant	ss538110560	AX-75345240	A/G	0.824398	0.700638	0.11096	0.592863	0.850819	0.459482	0.642919	0.641304	0.632387	0.586527	0.0287353	0.588858	0.720461	0.841818	0.601899	0.706372	0.585015	0.897368	0.706432	0.124969	0.315335	0.557445	0.860809	0.650473	0.618021	0.356482	0.305146	0.426149	0.392242	0.403556	0.174913	0.117415	0.152862	0.1085	0.0700735	0.0679635	0.116573	0.174973	0.160188	0.184093	0.198845
rs312918337	EXOC4	416700	1	1735280	intron-variant	ss537757838	AX-75345534	A/C	0.940713	0.453436	0.800939	0.315097	0.330132	0.857886	0.747615	0.335782	0.384963	0.585399	0.624763	0.971824	0.15172	0.946054	0.356917	0.522656	0.498843	0.394191	0.522631	0.996887	0.110268	0.96751	0.109408	0.25415	0.33208	0.620449	0.657255	0.773399	0.782542	0.395267	0.525576	0.659695	0.636433	0.46724	0.742567	0.734938	0.803157	0.768009	0.802451	0.829608	0.698776
rs313239887	EXOC4	416700	1	1736126	intron-variant	ss537971108	AX-75345735	C/T	0.964539	0.928538	0.00697283	0.754143	0.497622	0.605132	0.336241	0.906257	0.151705	0.858226	0.540526	0.668783	0.259207	0.837453	0.111149	0.687971	0.194042	0.0883188	0.692087	0.368992	0.117216	0.905754	0.0341565	0.462439	0.27717	0.850622	0.90194	0.958571	0.90424	0.892096	0.741927	0.549251	0.574974	0.432388	0.373585	0.283887	0.45034	0.569934	0.56039	0.594067	0.483889
rs314849898	EXOC4	416700	1	1738527	intron-variant	ss537794978	AX-80853636	C/G	0.964539	0.928538	0.00697283	0.754143	0.497622	0.605132	0.36768	0.906257	0.151705	0.858226	0.477726	0.668783	0.259207	0.837453	0.111149	0.687971	0.194042	0.0883188	0.692087	0.368992	0.117216	0.905754	0.0341565	0.462439	0.312297	0.850622	0.955759	0.987045	0.958919	0.942144	0.797727	0.60073	0.638237	0.493585	0.428283	0.332938	0.511287	0.64856	0.644233	0.678336	0.566888
rs15745338	EXOC4	416700	1	1738883	intron-variant	ss537820582	AX-75346382	C/T	0.722645	0.830131	0.00891389	0.945375	0.935366	0.828138	0.835262	0.537307	0.231257	0.57577	0.736188	0.346052	0.0403962	0.565962	0.115909	0.995785	0.35281	0.0410609	0.991513	0.514494	0.0178963	0.604523	0.0635796	0.300322	0.587026	0.963067	0.840441	0.834575	0.778409	0.83253	0.593608	0.46495	0.431697	0.40155	0.266983	0.280929	0.342239	0.465961	0.462438	0.501239	0.450684
rs14081599	EXOC4	416700	1	1744227	intron-variant	ss537952844	AX-75347672	C/T	0.478342	0.0491751	0.316518	0.367676	0.0690572	0.615876	0.106531	0.198006	0.517213	0.200873	0.278805	0.333382	0.715387	0.320815	0.799421	0.645754	0.479978	0.884112	0.65014	0.731106	0.655951	0.369127	0.445347	0.725873	0.390453	0.558628	0.296622	0.256168	0.272347	0.184693	0.118635	0.155362	0.194346	0.197515	0.133467	0.258141	0.476651	0.348177	0.307514	0.324514	0.235884
rs315502732	EXOC4	416700	1	1746007	intron-variant	ss537909320	AX-75348131	C/T	0.218348	0.0997647	0.00828731	0.86409	0.170825	0.32319	0.320916	0.419283	0.331865	0.40745	0.404897	0.642436	0.379373	0.825595	0.789652	0.480136	0.385984	0.981194	0.484718	0.331054	0.450534	0.402021	0.60836	0.548568	0.905651	0.722841	0.716271	0.542148	0.592497	0.547775	0.549524	0.726113	0.758911	0.779584	0.717343	0.945734	0.979865	0.836464	0.764183	0.757855	0.667145
rs14081608	EXOC4	416700	1	1750638	intron-variant	ss537904486	AX-75349220	A/C	0.893817	0.654581	0.756711	0.629078	0.290175	0.809959	0.766223	0.727765	0.127645	0.596147	0.941482	0.73157	0.463404	0.796676	0.890984	0.753246	0.540511	0.939886	0.753254	0.585058	0.308598	0.917717	0.146152	0.883419	0.326389	0.4577	0.259346	0.275845	0.276672	0.144289	0.100273	0.206997	0.146305	0.156497	0.222666	0.338494	0.304976	0.330578	0.360979	0.399337	0.47127
rs317968291	EXOC4	416700	1	1752253	intron-variant	ss538256320	AX-75349655	A/G	0.337425	0.596369	0.378316	0.62467	0.19651	0.0972932	0.647466	0.820665	0.647802	0.304536	0.48749	0.454063	0.844264	0.953114	0.297623	0.443692	0.738628	0.078878	0.443699	0.138239	0.810129	0.646252	0.541702	0.892555	0.7584	0.725017	0.425775	0.33436	0.337968	0.173614	0.179044	0.281906	0.201101	0.152608	0.218915	0.314586	0.33673	0.354531	0.356278	0.396261	0.29852
rs317966029	EXOC4	416700	1	1752424	intron-variant	ss537924539	AX-75349707	C/T	0.218348	0.0997647	0.00828731	0.86409	0.170825	0.32319	0.320916	0.419283	0.331865	0.40745	0.404897	0.642436	0.379373	0.825595	0.789652	0.480136	0.385984	0.981194	0.484718	0.331054	0.450534	0.402021	0.60836	0.548568	0.905651	0.722841	0.716271	0.542148	0.592497	0.547775	0.549524	0.726113	0.758911	0.779584	0.717343	0.945734	0.979865	0.836464	0.764183	0.757855	0.667145
rs312901198	EXOC4	416700	1	1755404	intron-variant	ss538242116	AX-75350485	A/G	0.707159	0.837599	0.21651	0.617194	0.620677	0.357399	0.109952	0.97529	0.694837	0.810339	0.796605	0.766721	0.749905	0.956102	0.114263	0.546429	0.191301	0.134528	0.546354	0.601979	0.0105051	0.251766	0.0324476	0.629625	0.0821484	0.932376	0.495297	0.497806	0.473712	0.372809	0.246731	0.197919	0.206761	0.132887	0.124147	0.0882813	0.234841	0.257751	0.215767	0.230517	0.140619
rs13779007	EXOC4	416700	1	1756179	intron-variant	ss537839984	AX-80914609	C/G	0.665115	0.12924	0.78841	0.720603	0.982713	0.661151	0.467459	0.827981	0.934104	0.743301	0.877398	0.893292	0.87982	0.873405	0.578831	0.238525	0.432638	0.891086	0.236401	0.409764	0.158938	0.525373	0.262558	0.579769	0.211898	0.50091	0.493355	0.465581	0.473246	0.583855	0.401924	0.327466	0.427683	0.470923	0.338702	0.305341	0.636247	0.49415	0.410353	0.39055	0.344461
rs14081629	EXOC4	416700	1	1758805	intron-variant	ss538196623	AX-75351371	A/G	0.198298	0.202687	0.266308	0.537727	0.864809	0.0153141	0.834023	0.521493	0.734465	0.974552	0.0299792	0.627656	0.160061	0.0730265	0.397827	0.790705	0.678289	0.235578	0.790795	0.232529	0.320344	0.961881	0.159658	0.152784	0.423758	0.212987	0.479899	0.415349	0.427186	0.274477	0.413146	0.401566	0.327756	0.470797	0.523928	0.732271	0.911731	0.664959	0.698664	0.69755	0.51155
rs317777958	EXOC4	416700	1	1759551	intron-variant	ss538278571	AX-75351545	A/G	0.769494	0.580385	0.711868	0.923167	0.178384	0.742772	0.161184	0.777761	0.523263	0.754577	0.281412	0.807161	0.761322	0.659715	0.277585	0.938809	0.431271	0.257422	0.938837	0.874584	0.0579832	0.294971	0.27535	0.97824	0.815624	0.442514	0.22666	0.295258	0.272652	0.0998077	0.0332788	0.0462752	0.0331239	0.0148675	0.0178789	0.0205022	0.0603866	0.0783208	0.0666416	0.0865861	0.0540886
rs317589475	EXOC4	416700	1	1759622	intron-variant	ss538288476	AX-75351563	C/T	0.696744	0.634926	0.606774	0.934379	0.167651	0.645153	0.145413	0.727651	0.493083	0.897014	0.291251	0.88632	0.85121	0.673224	0.221219	0.972138	0.382129	0.185472	0.972155	0.953209	0.0393561	0.209779	0.233098	0.884263	0.820877	0.503265	0.175712	0.23233	0.212367	0.0737223	0.0231893	0.0325535	0.0216724	0.00949806	0.0113603	0.0128253	0.0395432	0.0520771	0.0438802	0.0579373	0.035715
rs317801654	EXOC4	416700	1	1763426	intron-variant	ss537828941	AX-80823554	C/G	0.929026	0.889412	0.235694	0.835407	0.210712	0.585173	0.867986	0.563858	0.852184	0.520212	0.492036	0.393155	0.183537	0.723278	0.130868	0.894985	0.387254	0.0673499	0.894932	0.797689	0.000885695	0.133759	0.0690728	0.417716	0.232958	0.756682	0.469334	0.427884	0.404683	0.373975	0.199101	0.177032	0.150198	0.132183	0.0837745	0.0942779	0.163836	0.191297	0.159996	0.174258	0.124355
rs314420761	EXOC4	416700	1	1765970	intron-variant	ss538209337	AX-75353063	C/T	0.210871	0.24077	0.344759	0.999824	0.237438	0.311585	0.809897	0.867659	0.558239	0.579313	0.219304	0.576324	0.931789	0.37806	0.45867	0.729727	0.566297	0.714325	0.724935	0.794182	0.257477	0.128143	0.653919	0.958988	0.805463	0.654252	0.0428606	0.0514714	0.0511608	0.0228569	0.00742993	0.00685194	0.00757366	0.00764394	0.00656295	0.0119305	0.0692735	0.0341335	0.0247711	0.0283819	0.0155962
rs15013836	EXOC4	416700	1	1766886	intron-variant	ss538254587	AX-75353260	C/T	0.982181	0.677634	0.383309	0.962562	0.283455	0.341761	0.913343	0.882403	0.532455	0.343094	0.79258	0.223254	0.0987062	0.256707	0.24083	0.526082	0.411453	0.209968	0.524367	0.533705	0.0837122	0.281021	0.397714	0.454664	0.583417	0.584541	0.551866	0.433538	0.411887	0.349785	0.259722	0.279062	0.196939	0.22054	0.192836	0.190329	0.459833	0.335898	0.324199	0.327079	0.17965
rs315973218	EXOC4	416700	1	1772306	intron-variant	ss538045719	AX-80925473	A/T	0.820573	0.676722	0.497881	0.631322	0.648188	0.98328	0.0683109	0.880243	0.41955	0.650689	0.523836	0.504326	0.221281	0.745304	0.896442	0.757234	0.747518	0.712631	0.757309	0.58155	0.154431	0.900608	0.568428	0.484117	0.305085	0.555409	0.409691	0.60977	0.596243	0.288057	0.224733	0.321098	0.270426	0.154888	0.296739	0.237986	0.341351	0.370227	0.380646	0.437284	0.398018
rs315290729	EXOC4	416700	1	1772362	intron-variant	ss538238517	AX-75354683	C/T	0.0961016	0.756456	0.410528	0.148829	0.592676	0.0274164	0.0954622	0.236897	0.58162	0.753437	0.57099	0.6958	0.779963	0.95204	0.0379427	0.961357	0.105277	0.0219665	0.961301	0.115785	0.283542	0.249265	0.066422	0.695519	0.626801	0.264634	0.244384	0.238509	0.232666	0.097423	0.0770183	0.0991379	0.054662	0.0376696	0.0741544	0.0899401	0.150595	0.140094	0.127271	0.145378	0.0921802
rs313245401	EXOC4	416700	1	1772867	intron-variant	ss537788188	AX-75354799	C/T	0.929026	0.889412	0.235694	0.835407	0.210712	0.585173	0.735837	0.563858	0.852184	0.520212	0.526863	0.393155	0.183537	0.723278	0.130868	0.894985	0.387254	0.0673499	0.894932	0.797689	0.000885695	0.133759	0.0690728	0.417716	0.312149	0.756682	0.516352	0.473692	0.447534	0.411061	0.222084	0.198087	0.169932	0.149879	0.0971687	0.108696	0.188495	0.219348	0.182098	0.197905	0.141944
rs15013843	EXOC4	416700	1	1773095	intron-variant	ss537859665	AX-75354854	C/T	0.0921916	0.800887	0.0653739	0.067584	0.223385	0.0293767	0.920407	0.283916	0.819991	0.813908	0.0319747	0.749149	0.913544	0.489417	0.298967	0.987548	0.353822	0.238166	0.987449	0.021704	0.148957	0.830596	0.453235	0.753181	0.722856	0.587383	0.853237	0.948041	0.980782	0.914185	0.533518	0.562429	0.66973	0.536946	0.365313	0.333185	0.462128	0.5872	0.548517	0.592357	0.588498
rs14081642	EXOC4	416700	1	1774247	intron-variant	ss537857544	AX-75355126	A/G	0.298714	0.848365	0.511958	0.693446	0.390094	0.299741	0.33697	0.855508	0.583558	0.339197	0.502644	0.404853	0.896128	0.587878	0.214222	0.893454	0.377377	0.149724	0.893476	0.973911	0.0720091	0.198284	0.436129	0.813258	0.823606	0.214821	0.156375	0.191185	0.173055	0.0788402	0.0280332	0.0325223	0.019571	0.0106013	0.0152336	0.0174665	0.0369564	0.0538825	0.047989	0.0599355	0.0407201
rs316974543	EXOC4	416700	1	1774364	intron-variant	ss538205778	AX-80863783	C/G	0.147418	0.924435	0.652915	0.776583	0.797348	0.451668	0.317885	0.691351	0.358434	0.595113	0.976733	0.902963	0.0854655	0.254029	0.951962	0.750799	0.846172	0.877006	0.750771	0.739983	0.203743	0.980697	0.300308	0.220605	0.303161	0.194796	0.314249	0.440619	0.42762	0.212321	0.174595	0.22855	0.173227	0.113432	0.251053	0.249203	0.268096	0.316909	0.341403	0.376933	0.372286
rs314794448	EXOC4	416700	1	1777936	intron-variant	ss537891440	AX-75356042	A/G	0.227426	0.461016	0.49282	0.894019	0.994006	0.243154	0.450026	0.703074	0.963133	0.655524	0.886571	0.686599	0.443891	0.484287	0.669184	0.800834	0.676322	0.715627	0.802907	0.250347	0.0387209	0.701935	0.207869	0.677693	0.152512	0.584725	0.613849	0.686752	0.668898	0.3348	0.352498	0.537601	0.363367	0.33608	0.584988	0.543498	0.843938	0.664997	0.758583	0.779747	0.606263
rs314583219	EXOC4	416700	1	1781149	intron-variant	ss537789887	AX-75356770	A/G	0.686519	0.501786	0.931731	0.730189	0.323364	0.626839	0.459495	0.808943	0.926033	0.82127	0.0629491	0.726106	0.479721	0.685117	0.97817	0.803535	0.724376	0.882108	0.799441	0.302842	0.00692962	0.197984	0.576811	0.777012	0.472073	0.849187	0.745084	0.691418	0.693671	0.924356	0.621117	0.521748	0.616912	0.692832	0.407545	0.422721	0.581859	0.531251	0.428291	0.409924	0.37582
rs312431095	EXOC4	416700	1	1782589	intron-variant	ss537716572	AX-75357104	A/G	0.552351	0.853617	0.0514156	0.0736688	0.289073	0.436356	0.195476	0.0837317	0.673187	0.17914	0.146524	0.311352	0.943522	0.819039	0.15078	0.191453	0.052541	0.386803	0.191433	0.0345437	0.246371	0.515837	0.291433	0.380456	0.265875	0.942258	0.764842	0.920025	0.88383	0.805637	0.602514	0.489646	0.547454	0.479533	0.36738	0.367403	0.485877	0.516176	0.500411	0.518456	0.401174
rs312935666	EXOC4	416700	1	1785572	intron-variant	ss538235532	AX-75357814	G/T	0.130721	0.256481	0.024413	0.910207	0.714977	0.398824	0.709897	0.741945	0.526771	0.591402	0.673937	0.531856	0.271498	0.528566	0.137637	0.0259451	0.018074	0.425382	0.0261436	0.375194	0.698007	0.773454	0.801261	0.853729	0.0936532	0.825418	0.642765	0.889043	0.913009	0.656439	0.618723	0.560685	0.647523	0.619883	0.607486	0.794195	0.829211	0.693422	0.651408	0.681351	0.698803
rs314293084	EXOC4	416700	1	1785660	intron-variant	ss538270375	AX-75357832	C/T	0.121163	0.340746	0.0113081	0.307615	0.409091	0.132724	0.234479	0.336401	0.619844	0.558277	0.252991	0.767692	0.973404	0.30652	0.544107	0.669284	0.846831	0.429674	0.674318	0.329207	0.154694	0.213849	0.129156	0.49153	0.798726	0.867266	0.469808	0.479341	0.48429	0.322636	0.210511	0.258989	0.212243	0.206063	0.203922	0.246444	0.442479	0.324209	0.274657	0.290351	0.232105
rs14081657	EXOC4	416700	1	1793649	intron-variant	ss537918188	AX-75359729	A/G	0.175265	0.354793	0.00410925	0.566514	0.652715	0.443888	0.399164	0.78062	0.54809	0.226885	0.900674	0.276036	0.148602	0.754285	0.451845	0.626575	0.406019	0.398961	0.630279	0.393867	0.0907111	0.853644	0.669439	0.91149	0.49131	0.6164	0.948061	0.89028	0.856719	0.969426	0.824048	0.713232	0.728668	0.686551	0.552111	0.538587	0.539726	0.701062	0.687917	0.704434	0.650547
rs317347217	EXOC4	416700	1	1794503	intron-variant	ss537858419	AX-75359944	A/C	0.121163	0.340746	0.0113081	0.307615	0.409091	0.132724	0.224641	0.336401	0.619844	0.558277	0.280889	0.767692	0.973404	0.30652	0.544107	0.669284	0.846831	0.429674	0.674318	0.329207	0.154694	0.213849	0.129156	0.49153	0.85452	0.867266	0.499271	0.509646	0.514643	0.346102	0.227612	0.277425	0.226719	0.218118	0.214433	0.258287	0.460952	0.338442	0.286409	0.302273	0.242332
rs15013865	EXOC4	416700	1	1797181	intron-variant	ss538051901	AX-80830158	A/T	0.722312	0.785381	0.543863	0.670491	0.154216	0.524553	0.515034	0.544184	0.925369	0.390315	0.187728	0.451374	0.774219	0.502976	0.896006	0.68764	0.739273	0.613219	0.689374	0.718785	0.146908	0.220444	0.994891	0.606891	0.742399	0.949338	0.606181	0.667916	0.626234	0.302555	0.182351	0.247407	0.145869	0.0926127	0.130295	0.109402	0.304227	0.267184	0.259596	0.285929	0.130923
rs313001562	EXOC4	416700	1	1799141	intron-variant	ss538154695	AX-80938561	C/G	0.729907	0.629673	0.0135867	0.423615	0.48338	0.804876	0.881621	0.35339	0.907345	0.211226	0.733391	0.264189	0.635923	0.920678	0.722428	0.620114	0.494875	0.693218	0.622114	0.920816	0.935405	0.879297	0.460146	0.626703	0.564979	0.930687	0.622692	0.649681	0.602544	0.352832	0.270451	0.345314	0.213429	0.175272	0.252941	0.22231	0.443628	0.4274	0.476679	0.504888	0.308792
rs317346954	EXOC4	416700	1	1803506	intron-variant	ss538251289	AX-75362091	C/T	0.826357	0.378055	0.231781	0.351575	0.913428	0.768885	0.954157	0.202529	0.837082	0.677795	0.428993	0.998237	0.482906	0.690881	0.242786	0.363004	0.374821	0.418815	0.360098	0.645525	0.0718848	0.442598	0.172413	0.236094	0.111894	0.864211	0.783022	0.614598	0.626847	0.90845	0.740791	0.71524	0.778945	0.92033	0.677594	0.695054	0.758991	0.722112	0.643365	0.619309	0.699162
rs313249067	EXOC4	416700	1	1804232	intron-variant	ss537909156	AX-75362258	A/C	0.199015	0.757159	0.998105	0.601093	0.184979	0.05058	0.147596	0.611258	0.58331	0.730087	0.868371	0.583121	0.551356	0.438608	0.191107	0.624898	0.549778	0.0674105	0.624929	0.644658	0.0707536	0.212941	0.0710282	0.507241	0.900153	0.955844	0.18384	0.221689	0.202275	0.0546663	0.021065	0.0280957	0.0129455	0.00920776	0.0124362	0.0214983	0.0856293	0.0672188	0.0618867	0.0794594	0.0377316
rs15745607	EXOC4	416700	1	1805259	intron-variant	ss538281661	AX-75362508	C/T	0.722312	0.785381	0.543863	0.670491	0.154216	0.524553	0.565162	0.544184	0.925369	0.390315	0.256872	0.451374	0.774219	0.502976	0.896006	0.68764	0.739273	0.613219	0.689374	0.718785	0.146908	0.220444	0.994891	0.606891	0.866913	0.949338	0.676477	0.742607	0.698943	0.348515	0.213947	0.28555	0.173503	0.113027	0.156903	0.13386	0.357502	0.316219	0.305092	0.330813	0.15371
rs315420182	EXOC4	416700	1	1806885	intron-variant	ss538216673	AX-75362907	A/G	0.363853	0.160956	0.126623	0.612142	0.446894	0.642327	0.773448	0.838804	0.448071	0.40103	0.525411	0.524707	0.538637	0.690025	0.992824	0.995945	0.916963	0.770143	0.99346	0.420686	0.840891	0.940989	0.406734	0.729623	0.885669	0.908588	0.223427	0.212	0.230637	0.397917	0.353757	0.265112	0.376419	0.557076	0.367301	0.562337	0.499435	0.39228	0.357003	0.349046	0.549621
rs313272878	EXOC4	416700	1	1811416	intron-variant	ss538085073	AX-80766004	A/T	0.439058	0.737423	0.096913	0.893235	0.958849	0.2817	0.0423068	0.491242	0.719299	0.882814	0.66815	0.874902	0.759497	0.684606	0.507333	0.572496	0.754815	0.27997	0.568948	0.561806	0.343423	0.682224	0.100019	0.799528	0.698594	0.923866	0.732956	0.968626	0.913789	0.478819	0.383389	0.322257	0.271834	0.140293	0.200975	0.166336	0.392167	0.404687	0.397613	0.453703	0.255935
rs313726659	EXOC4	416700	1	1815667	intron-variant	ss538205659	AX-75365069	C/T	0.707159	0.837599	0.21651	0.617194	0.620677	0.357399	0.117173	0.97529	0.694837	0.810339	0.81584	0.766721	0.749905	0.956102	0.114263	0.546429	0.191301	0.134528	0.546354	0.601979	0.0105051	0.251766	0.0324476	0.629625	0.0761356	0.932376	0.477023	0.48174	0.460274	0.363436	0.241166	0.19487	0.204784	0.131797	0.123383	0.0873054	0.231794	0.252864	0.210146	0.223405	0.134733
rs316840106	EXOC4	416700	1	1815774	intron-variant	ss538054046	AX-75365103	C/T	0.807134	0.515937	0.137228	0.231349	0.321332	0.871287	0.524984	0.129187	0.663963	0.475605	0.729647	0.551485	0.836285	0.820059	0.442438	0.929095	0.576056	0.436724	0.929134	0.102759	0.403608	0.629153	0.576868	0.654563	0.253047	0.634213	0.431457	0.541051	0.52547	0.408237	0.232198	0.198759	0.198884	0.224079	0.165489	0.226748	0.464292	0.356862	0.330809	0.340981	0.244338
rs315047426	EXOC4	416700	1	1816007	intron-variant	ss538080855	AX-75365168	A/G	0.807134	0.515937	0.137228	0.231349	0.321332	0.871287	0.51064	0.129187	0.663963	0.475605	0.715371	0.551485	0.836285	0.820059	0.442438	0.929095	0.576056	0.436724	0.929134	0.102759	0.403608	0.629153	0.576868	0.654563	0.247415	0.634213	0.472084	0.586663	0.569573	0.444228	0.256	0.218958	0.21805	0.244072	0.181241	0.247329	0.499164	0.387587	0.3604	0.371109	0.267464
rs316923518	EXOC4	416700	1	1817127	intron-variant	ss537996797	AX-80884679	C/G	0.877917	0.211194	0.197024	0.687586	0.86325	0.322468	0.149249	0.503814	0.82792	0.893184	0.12157	0.99829	0.632549	0.978979	0.144828	0.610911	0.302815	0.030499	0.606486	0.412464	0.551999	0.972245	0.0889911	0.748228	0.737189	0.863312	0.622249	0.625294	0.581414	0.309145	0.299214	0.368233	0.231262	0.157154	0.230033	0.245497	0.267762	0.355887	0.406398	0.46309	0.381057
rs316427793	EXOC4	416700	1	1820084	intron-variant	ss538132449	AX-75366207	C/T	0.0173498	0.248263	0.545777	0.0969961	0.0241371	0.0720647	0.0122042	0.977	0.362343	0.43747	0.414967	0.493538	0.515729	0.849944	0.205638	0.475818	0.139308	0.518134	0.475794	0.790851	0.251513	0.807879	0.119009	0.799237	0.949789	0.775846	0.470284	0.578447	0.565808	0.48557	0.566163	0.403853	0.467959	0.336119	0.50171	0.343236	0.60021	0.523505	0.51875	0.537597	0.474617
rs313857014	PODXL	395755	1	2985947	upstream-variant-2KB	ss538203854	AX-80855280	C/G	0.103277	0.31021	0.067471	0.997681	0.541066	0.538417	0.381478	0.444046	0.601928	0.638687	0.699804	0.846759	0.1933	0.547796	0.236701	0.151337	0.135925	0.25952	0.15055	0.120798	0.805558	0.984197	0.809213	0.222552	0.885359	0.897831	0.270946	0.341489	0.337565	0.274398	0.392062	0.442233	0.490903	0.462334	0.547327	0.541672	0.548116	0.526403	0.630078	0.651611	0.621366
rs314811339	PODXL	395755	1	2989485	intron-variant	ss538045592	AX-75423165	A/C	0.191552	0.545386	0.0473418	0.837464	0.885929	0.415994	0.284711	0.162118	0.538491	0.889397	0.978001	0.9636	0.155905	0.680212	0.160919	0.101182	0.0350129	0.27048	0.100583	0.508421	0.709091	0.85482	0.797319	0.200551	0.608679	0.453155	0.317102	0.400021	0.407593	0.286444	0.351666	0.409559	0.435592	0.368789	0.377967	0.402177	0.417385	0.396584	0.473835	0.492488	0.455379
rs15185529	PODXL	395755	1	2995374	intron-variant	ss537949933	AX-75423278	C/T	0.583255	0.863652	0.814246	0.0763946	0.8652	0.831708	0.672353	0.238966	0.808886	0.96409	0.46793	0.805117	0.126654	0.964972	0.270829	0.166945	0.612003	0.0324119	0.166923	0.300639	0.132794	0.523806	0.892463	0.309449	0.616602	0.61464	0.388829	0.500401	0.511314	0.520723	0.575252	0.418159	0.375059	0.348177	0.420805	0.493944	0.36918	0.512283	0.466737	0.43713	0.352312
rs13572675	PODXL	395755	1	2995883	intron-variant	ss538136865	AX-75423290	A/G	0.603633	0.182521	0.0662708	0.886674	0.761084	0.734065	0.419334	0.103105	0.270275	0.456593	0.563142	0.430953	0.761535	0.823941	0.0301898	0.220429	0.010159	0.0919185	0.219214	0.759268	0.525964	0.540646	0.775029	0.678755	0.532604	0.160101	0.439064	0.325167	0.296077	0.268074	0.175208	0.300747	0.268789	0.17722	0.250018	0.225041	0.231437	0.267567	0.241595	0.249588	0.322759
rs14788880	PODXL	395755	1	2999594	intron-variant	ss538201783	AX-75423367	C/T	0.271457	0.664629	0.0325732	0.688902	0.706351	0.649767	0.212963	0.69444	0.282376	0.74122	0.679029	0.683735	0.0442777	0.631909	0.150097	0.424855	0.186184	0.0943406	0.423202	0.399265	0.893509	0.673184	0.876714	0.30585	0.957933	0.923899	0.591695	0.71587	0.747536	0.521641	0.783284	0.883516	0.802181	0.734054	0.824002	0.817743	0.679822	0.754144	0.822005	0.797089	0.637454
rs316420728	PODXL	395755	1	3002721	intron-variant	ss537978592	AX-75423426	A/G	0.50893	0.447996	0.448928	0.986759	0.936422	0.622786	0.293616	0.658828	0.416013	0.489153	0.690544	0.630975	0.131163	0.553686	0.296467	0.94742	0.85418	0.0974863	0.94743	0.500347	0.577097	0.763995	0.408827	0.529307	0.800018	0.464577	0.395003	0.29574	0.272402	0.278185	0.320715	0.501187	0.413535	0.354609	0.525646	0.527593	0.38635	0.475487	0.525948	0.54362	0.652388
rs316592396	PODXL	395755	1	3005392	intron-variant	ss537807157	AX-75423483	C/T	0.453483	0.0986076	0.0860947	0.900076	0.989882	0.770664	0.281958	0.197531	0.26475	0.620577	0.74951	0.559138	0.487333	0.829169	0.0167446	0.508009	0.029267	0.0183113	0.506109	0.429435	0.711901	0.453349	0.98953	0.66483	0.98642	0.460345	0.352402	0.277032	0.258286	0.196868	0.114282	0.189767	0.172785	0.093036	0.124545	0.119515	0.143055	0.153539	0.128954	0.130537	0.159048
rs15185505	PODXL	395755	1	3008465	intron-variant	ss538163110	AX-80841050	C/G	0.25553	0.463697	0.0983507	0.464133	0.570457	0.105686	0.608925	0.495906	0.653898	0.861884	0.746345	0.938688	0.611659	0.733347	0.814647	0.318773	0.573846	0.6626	0.317365	0.324592	0.664506	0.697575	0.367448	0.670492	0.735672	0.536994	0.552778	0.756253	0.795228	0.751058	0.952535	0.840051	0.936794	0.920109	0.894606	0.849184	0.986783	0.92239	0.999637	0.997654	0.782591
rs316273890	PODXL	395755	1	3009716	intron-variant	ss537839911	AX-75423574	A/G	0.900775	0.939335	0.57608	0.288439	0.585205	0.879089	0.245782	0.38947	0.533787	0.575938	0.818235	0.646241	0.204857	0.574517	0.131469	0.53953	0.260335	0.0686747	0.539558	0.192091	0.6838	0.392931	0.913154	0.946948	0.751217	0.535157	0.345347	0.387315	0.377048	0.479757	0.522281	0.469417	0.458814	0.421766	0.500193	0.488415	0.586638	0.562007	0.581259	0.597094	0.607771
rs15185499	PODXL	395755	1	3010011	intron-variant	ss538139004	AX-80792245	C/G	0.315737	0.58363	0.187034	0.960815	0.393524	0.336034	0.620167	0.573513	0.845791	0.950802	0.917835	0.94607	0.554038	0.982524	0.806347	0.468203	0.597807	0.784719	0.466573	0.0934092	0.317469	0.932512	0.576241	0.30868	0.964605	0.721682	0.800998	0.998351	0.956164	0.983388	0.761524	0.802287	0.732748	0.679468	0.692116	0.769592	0.677975	0.728492	0.643579	0.644865	0.807469
rs315478723	PODXL	395755	1	3011579	intron-variant	ss537834914	AX-75423610	G/T	0.197413	0.491445	0.0466666	0.426592	0.777562	0.827025	0.265397	0.228142	0.366315	0.720152	0.798328	0.936462	0.0879464	0.761596	0.0722572	0.208645	0.0468483	0.0721344	0.207653	0.230503	0.531931	0.636638	0.954786	0.149766	0.804778	0.897189	0.54628	0.640974	0.655742	0.505393	0.641705	0.75863	0.815888	0.786427	0.81502	0.8149	0.770867	0.754108	0.855567	0.866571	0.846059
rs313990516	PODXL	395755	1	3014824	intron-variant	ss538017959	AX-80835266	C/G	0.316416	0.636812	0.125275	0.865288	0.757783	0.392818	0.830188	0.257546	0.914274	0.783589	0.671857	0.838382	0.685992	0.614715	0.744115	0.119489	0.191941	0.885142	0.118795	0.193635	0.520869	0.932345	0.553536	0.455549	0.693463	0.445454	0.357472	0.534869	0.560788	0.537509	0.662245	0.598901	0.725237	0.755555	0.715984	0.712804	0.848484	0.763335	0.862423	0.876174	0.790325
rs316288351	PODXL	395755	1	3022272	intron-variant	ss537856899	AX-75423836	C/T	0.604562	0.241608	0.714866	0.142201	0.535557	0.57138	0.933217	0.554666	0.423196	0.488262	0.521325	0.649511	0.389748	0.910448	0.303321	0.820582	0.598518	0.377172	0.820395	0.341471	0.0282573	0.993637	0.976351	0.185297	0.418816	0.502338	0.284812	0.333645	0.330175	0.178748	0.156601	0.274027	0.343651	0.250068	0.279502	0.247667	0.312873	0.294237	0.326761	0.346247	0.357835
rs317055778	PODXL	395755	1	3022831	intron-variant	ss537832369	AX-75423845	A/C	0.404344	0.684122	0.429976	0.158576	0.767475	0.902732	0.257119	0.766008	0.763979	0.479092	0.743072	0.608302	0.0418678	0.805125	0.456047	0.980728	0.64501	0.202188	0.980565	0.6607	0.182287	0.718211	0.8245	0.25868	0.342377	0.472235	0.349102	0.313051	0.302461	0.161353	0.153845	0.349827	0.366642	0.263544	0.334697	0.313462	0.259686	0.289667	0.32508	0.336392	0.392203
rs316887942	PODXL	395755	1	3027817	utr-variant-3-prime	ss538018054	AX-75423945	A/G	0.841989	0.898768	0.650604	0.166452	0.880486	0.52567	0.142529	0.677247	0.344588	0.657908	0.611679	0.511829	0.174365	0.521	0.0401194	0.141793	0.680972	0.00182224	0.14178	0.937139	0.415985	0.258321	0.870344	0.502869	0.174188	0.335114	0.0982205	0.121661	0.120263	0.171705	0.148839	0.118992	0.124853	0.0853799	0.0921964	0.0986114	0.142077	0.132525	0.133122	0.13647	0.130582
rs13823890	PODXL	395755	1	3028215	downstream-variant-500B	ss538034148	AX-75423955	C/T	0.939383	0.703583	0.668182	0.17295	0.393599	0.252673	0.974547	0.262321	0.274239	0.242719	0.717308	0.273179	0.958917	0.36281	0.335653	0.374979	0.175258	0.560198	0.374942	0.94288	0.943185	0.906938	0.440395	0.849843	0.78319	0.175198	0.358895	0.368466	0.347217	0.576332	0.432848	0.427463	0.531143	0.631497	0.647429	0.760658	0.716018	0.693239	0.750741	0.806006	0.879143
rs314173492	MKLN1	418250	1	3041201	intron-variant	ss538111286	AX-75424208	A/G	0.293704	0.0971009	0.0648511	0.633019	0.789205	0.82712	0.535146	0.398798	0.16516	0.999704	0.506939	0.683998	0.552599	0.855908	0.0212681	0.112925	0.0268874	0.0398148	0.112222	0.112357	0.316254	0.859996	0.863388	0.216879	0.769595	0.984502	0.961708	0.864072	0.845174	0.836387	0.573386	0.649551	0.682519	0.625248	0.599599	0.569735	0.660993	0.677539	0.608029	0.615926	0.655165
rs13823877	MKLN1	418250	1	3043433	intron-variant	ss538039177	AX-75424252	C/T	0.252737	0.531435	0.0198177	0.571564	0.801493	0.571893	0.110815	0.694969	0.174908	0.651675	0.628132	0.558828	0.0412616	0.617699	0.0737302	0.586363	0.173227	0.029957	0.584457	0.314018	0.620583	0.692943	0.844542	0.278358	0.982948	0.838823	0.968834	0.869377	0.833199	0.853222	0.878005	0.787584	0.857917	0.932999	0.835619	0.823541	0.920462	0.869963	0.814505	0.842292	0.982786
rs318009054	MKLN1	418250	1	3043860	intron-variant	ss537771029	AX-75424262	C/T	0.180309	0.754169	0.280918	0.13593	0.624027	0.140491	0.085681	0.151212	0.737602	0.839018	0.724116	0.981449	0.034856	0.24526	0.335319	0.813711	0.311473	0.724309	0.813891	0.861217	0.319533	0.942004	0.763785	0.883255	0.853977	0.355189	0.0886356	0.0939723	0.0902268	0.0294081	0.0390517	0.0987158	0.0636937	0.0238452	0.0533503	0.0508215	0.0387895	0.0644618	0.0740093	0.0729433	0.0601044
rs315849362	MKLN1	418250	1	3044672	intron-variant	ss537996027	AX-75424280	A/G	0.247648	0.409261	0.012149	0.44661	0.947199	0.423596	0.0665552	0.730626	0.189527	0.711398	0.543347	0.708592	0.0295339	0.436956	0.113147	0.665636	0.233648	0.0427167	0.66361	0.369721	0.487191	0.859111	0.917976	0.465859	0.891496	0.844798	0.800446	0.959575	0.995838	0.769266	0.977031	0.897282	0.963458	0.967274	0.926475	0.906463	0.995033	0.937665	0.873864	0.898577	0.938478
rs317426628	MKLN1	418250	1	3050879	intron-variant	ss537962706	AX-75424395	A/G	0.292861	0.56785	0.216199	0.499253	0.786302	0.392465	0.0503812	0.441743	0.402207	0.51314	0.950539	0.559759	0.019178	0.532443	0.868114	0.486618	0.673501	0.327484	0.48675	0.782134	0.57654	0.621317	0.676942	0.608428	0.563088	0.377745	0.497529	0.494707	0.491945	0.176111	0.204891	0.401443	0.298936	0.161584	0.245537	0.245371	0.192288	0.259037	0.268582	0.259689	0.21837
rs13823868	MKLN1	418250	1	3055684	intron-variant	ss538085568	AX-75424472	A/C	0.680776	0.783817	0.315488	0.437381	0.895946	0.369777	0.147878	0.813462	0.168044	0.99383	0.723053	0.764261	0.0603624	0.999031	0.0338098	0.503486	0.460493	0.00261116	0.503498	0.975636	0.937814	0.659026	0.617784	0.314178	0.398635	0.475998	0.540519	0.670059	0.681636	0.903197	0.865179	0.621127	0.717901	0.802851	0.707074	0.684326	0.872136	0.809776	0.807199	0.814545	0.741219
rs14788837	MKLN1	418250	1	3056418	intron-variant	ss537776600	AX-75424487	A/G	0.744688	0.934462	0.361587	0.303987	0.847731	0.562661	0.119341	0.656462	0.148143	0.922284	0.66866	0.852745	0.0927231	0.963829	0.0512875	0.49636	0.521487	0.00416236	0.496366	0.954127	0.731795	0.62787	0.715787	0.336899	0.279663	0.73196	0.652881	0.796451	0.810524	0.87578	0.81372	0.905554	0.956784	0.901755	0.966794	0.969404	0.890332	0.955997	0.961137	0.959598	0.962245
rs13823864	MKLN1	418250	1	3056747	intron-variant	ss537909016	AX-75424499	A/G	0.47254	0.745593	0.188665	0.856279	0.937346	0.630888	0.0383179	0.515734	0.466443	0.987015	0.975843	0.946428	0.00650776	0.43333	0.614671	0.362247	0.667101	0.119406	0.362336	0.913026	0.990983	0.954351	0.842628	0.648399	0.545529	0.466144	0.624055	0.623279	0.625557	0.341115	0.398058	0.682197	0.574034	0.396523	0.559274	0.550537	0.439855	0.554992	0.571603	0.555342	0.495536
rs316473656	MKLN1	418250	1	3060760	intron-variant	ss538082127	AX-75424575	A/G	0.957617	0.349655	0.756862	0.891469	0.613599	0.661538	0.578188	0.429366	0.593908	0.560665	0.777321	0.512456	0.117723	0.677174	0.601283	0.656874	0.401886	0.94623	0.656973	0.368491	0.166321	0.73007	0.797824	0.654036	0.692279	0.290231	0.708514	0.846684	0.866945	0.608313	0.720614	0.934122	0.90714	0.761038	0.921849	0.850664	0.823031	0.92501	0.934096	0.914763	0.748001
rs15185436	MKLN1	418250	1	3062421	intron-variant	ss538078137	AX-75424613	C/T	0.330986	0.754289	0.341031	0.999692	0.986262	0.960478	0.0893871	0.992262	0.187071	0.559277	0.921927	0.458664	0.0873367	0.987203	0.138316	0.866492	0.365372	0.0540637	0.866567	0.470531	0.3089	0.389759	0.986767	0.487682	0.644029	0.630556	0.880892	0.716493	0.692805	0.429561	0.430177	0.639449	0.528133	0.411668	0.473773	0.504094	0.344294	0.420194	0.434169	0.429542	0.493642
rs314642132	MKLN1	418250	1	3065549	intron-variant	ss537878581	AX-80819761	C/G	0.452653	0.63691	0.352355	0.918667	0.712338	0.765633	0.083602	0.545474	0.555869	0.989394	0.922004	0.966395	0.0133561	0.754807	0.494992	0.64727	0.982171	0.144578	0.647394	0.846577	0.759055	0.713722	0.838241	0.399334	0.48839	0.25555	0.672634	0.666099	0.664904	0.319761	0.38624	0.682496	0.580915	0.405885	0.554912	0.527891	0.389406	0.510968	0.528308	0.511825	0.451703
rs13823857	MKLN1	418250	1	3066143	intron-variant	ss538057452	AX-75424685	A/G	0.452653	0.63691	0.352355	0.918667	0.712338	0.765633	0.0759406	0.545474	0.555869	0.989394	0.961698	0.966395	0.0133561	0.754807	0.494992	0.64727	0.982171	0.144578	0.647394	0.846577	0.759055	0.713722	0.838241	0.399334	0.453612	0.25555	0.67075	0.658882	0.653989	0.311404	0.375258	0.665504	0.560948	0.386849	0.534394	0.509797	0.373891	0.496709	0.518297	0.507902	0.451135
rs13823853	MKLN1	418250	1	3069069	intron-variant	ss537941571	AX-75424739	C/T	0.374554	0.53068	0.280017	0.699721	0.711189	0.528451	0.0706009	0.51563	0.479669	0.658145	0.968104	0.670139	0.0326724	0.723509	0.895838	0.719342	0.874835	0.474025	0.71949	0.792904	0.783301	0.644576	0.817211	0.467002	0.708266	0.368948	0.480067	0.475839	0.475152	0.174477	0.206268	0.406205	0.314914	0.178863	0.264241	0.259581	0.18731	0.271073	0.285406	0.275194	0.239749
rs316697356	MKLN1	418250	1	3071532	intron-variant	ss537928977	AX-75424790	C/T	0.929272	0.877244	0.93799	0.0411476	0.676296	0.0527387	0.622744	0.176213	0.180396	0.284052	0.647909	0.529233	0.752215	0.803488	0.090792	0.181688	0.0405442	0.275404	0.181665	0.716089	0.645497	0.440357	0.579799	0.454083	0.751513	0.668215	0.679077	0.689079	0.655814	0.723147	0.584214	0.598139	0.72732	0.840449	0.837856	0.960377	0.874628	0.862785	0.914573	0.962926	0.721728
rs314104091	MKLN1	418250	1	3076630	intron-variant	ss538181857	AX-80782605	A/T	0.551238	0.217681	0.86038	0.642	0.635167	0.602313	0.505855	0.662078	0.990349	0.517683	0.616701	0.50484	0.146332	0.503293	0.542705	0.397085	0.794779	0.429097	0.396916	0.575447	0.37843	0.655027	0.913625	0.575855	0.744721	0.521811	0.125036	0.18408	0.179234	0.0710422	0.0733344	0.140564	0.153478	0.102444	0.15644	0.155746	0.125413	0.185822	0.215125	0.221133	0.21789
rs317273631	MKLN1	418250	1	3077222	intron-variant	ss538250376	AX-75424924	C/T	0.324182	0.821599	0.257537	0.623534	0.988812	0.913852	0.0386602	0.771219	0.293117	0.664101	0.791546	0.69139	0.00453251	0.383402	0.244616	0.911386	0.536061	0.0638305	0.911573	0.849814	0.923531	0.576459	0.618308	0.5464	0.351312	0.532729	0.314726	0.307845	0.292902	0.136022	0.143131	0.325975	0.289921	0.198183	0.310385	0.324105	0.207856	0.294975	0.329867	0.3353	0.371596
rs317824286	MKLN1	418250	1	3081662	intron-variant	ss537748551	AX-75425003	C/T	0.745392	0.304507	0.335295	0.837086	0.976583	0.328314	0.131955	0.670538	0.871116	0.555111	0.891103	0.756079	0.0462538	0.652466	0.806982	0.294057	0.502649	0.608327	0.294146	0.677956	0.639502	0.751108	0.6514	0.977439	0.741479	0.782864	0.917276	0.977916	0.951633	0.636871	0.677656	0.881283	0.826083	0.663824	0.752749	0.734361	0.721926	0.806597	0.797722	0.772509	0.610742
rs313340725	MKLN1	418250	1	3083457	intron-variant	ss538173126	AX-75425041	A/G	0.823877	0.461654	0.596039	0.64364	0.885458	0.528768	0.16867	0.701769	0.84691	0.91619	0.866254	0.777676	0.0239199	0.841243	0.715179	0.456433	0.900076	0.277412	0.456535	0.931353	0.220686	0.771153	0.836571	0.840444	0.554426	0.55905	0.962258	0.875772	0.858808	0.808217	0.882222	0.88374	0.897361	0.99623	0.905752	0.960417	0.946008	0.940887	0.941622	0.967	0.8593
rs313038777	MKLN1	418250	1	3085259	intron-variant	ss537844049	AX-75425071	A/C	0.371072	0.786821	0.208143	0.711889	0.969004	0.428398	0.0244099	0.457338	0.512983	0.940224	0.986091	0.957797	0.0052523	0.376227	0.647174	0.394564	0.68831	0.134031	0.39467	0.970851	0.858196	0.86838	0.814883	0.778594	0.437676	0.47004	0.525962	0.516551	0.510083	0.259958	0.304485	0.556976	0.456592	0.305814	0.453041	0.442862	0.348044	0.448224	0.469334	0.461335	0.403556
rs314454776	MKLN1	418250	1	3086321	intron-variant	ss538099631	AX-75425094	C/T	0.572285	0.183248	0.569057	0.762351	0.714512	0.713689	0.532196	0.673819	0.779938	0.613587	0.727521	0.603502	0.129124	0.338757	0.589722	0.686348	0.913698	0.661426	0.686135	0.549519	0.445422	0.715885	0.894458	0.597096	0.69487	0.509432	0.170378	0.252289	0.249548	0.101721	0.103975	0.189642	0.196058	0.127024	0.197146	0.203634	0.187913	0.245004	0.272212	0.279241	0.271435
rs15185395	MKLN1	418250	1	3090446	intron-variant	ss537731686	AX-75425187	C/T	0.769833	0.934301	0.641613	0.153786	0.514337	0.414151	0.392616	0.445018	0.612198	0.722398	0.486839	0.873443	0.545025	0.319704	0.526306	0.214195	0.857987	0.180946	0.214222	0.621755	0.218731	0.849491	0.430116	0.67665	0.889345	0.471263	0.261191	0.317513	0.318575	0.345507	0.484233	0.412903	0.3313	0.298753	0.417415	0.436394	0.294867	0.407493	0.411014	0.397081	0.37059
rs316294088	MKLN1	418250	1	3091327	intron-variant	ss538287542	AX-80790571	A/T	0.902666	0.938206	0.482242	0.588121	0.773015	0.32547	0.128945	0.925621	0.894905	0.188085	0.823817	0.326344	0.211513	0.739457	0.860321	0.0759713	0.434179	0.294742	0.0759662	0.242823	0.891621	0.962278	0.615485	0.668187	0.873657	0.791592	0.198304	0.227381	0.215231	0.317479	0.294611	0.275942	0.335879	0.360072	0.388797	0.418411	0.391753	0.392559	0.431885	0.459006	0.654056
rs15185390	MKLN1	418250	1	3091411	reference,synonymous-codon	ss538259048	AX-75425216	A/C	0.323715	0.350192	0.480925	0.741509	0.938887	0.945885	0.178714	0.513071	0.452736	0.568944	0.976048	0.666827	0.0809607	0.446535	0.290235	0.928684	0.853394	0.0849714	0.92872	0.542621	0.393434	0.891635	0.459187	0.729949	0.411079	0.45619	0.41682	0.318016	0.293248	0.285822	0.321214	0.507133	0.410969	0.3212	0.460936	0.462213	0.332276	0.390913	0.423865	0.434712	0.515608
rs316050551	MKLN1	418250	1	3095773	intron-variant	ss538161160	AX-75425311	A/G	0.815199	0.408149	0.473076	0.964265	0.636883	0.467202	0.37891	0.758758	0.503479	0.668421	0.992212	0.793255	0.0696511	0.546653	0.336574	0.911136	0.600832	0.27645	0.906084	0.288665	0.725564	0.889275	0.940063	0.561957	0.617878	0.714003	0.324938	0.449963	0.466411	0.348076	0.449437	0.48854	0.4587	0.349232	0.382561	0.324247	0.185995	0.25578	0.255171	0.230385	0.173991
rs318189878	MKLN1	418250	1	3103349	intron-variant	ss537946006	AX-75425470	A/G	0.531671	0.57544	0.188891	0.964303	0.443345	0.141295	0.959293	0.916981	0.0658302	0.87977	0.860999	0.74287	0.4195	0.858584	0.839724	0.567371	0.952873	0.740998	0.563256	0.0640889	0.383171	0.508422	0.660532	0.774928	0.396775	0.570057	0.13818	0.203201	0.20208	0.19117	0.226719	0.250745	0.266258	0.182363	0.188645	0.13377	0.108106	0.123425	0.133381	0.127543	0.104398
rs312554589	MKLN1	418250	1	3107261	intron-variant	ss537863138	AX-75425553	C/T	0.245071	0.418509	0.675286	0.328795	0.986072	0.428741	0.0865494	0.710187	0.386644	0.85764	0.852802	0.738075	0.114909	0.375661	0.920022	0.81036	0.583639	0.622668	0.810428	0.873992	0.0641602	0.752258	0.478811	0.538089	0.623849	0.749963	0.176976	0.118356	0.105722	0.0783444	0.0826372	0.157634	0.0992869	0.0515721	0.0928718	0.104208	0.0671766	0.0916223	0.105854	0.110769	0.154898
rs13823825	MKLN1	418250	1	3107689	intron-variant	ss538016274	AX-75425559	G/T	0.255381	0.837914	0.830269	0.684002	0.787337	0.41576	0.197733	0.732215	0.811405	0.934035	0.965407	0.909221	0.0469922	0.500094	0.231152	0.65034	0.352706	0.16133	0.646345	0.19241	0.996236	0.957305	0.854718	0.528573	0.773067	0.775613	0.0739772	0.085062	0.0786175	0.0537719	0.0543781	0.0995228	0.0969393	0.0533439	0.0676823	0.0590175	0.0301187	0.0407218	0.049245	0.0494981	0.0685554
rs13823816	MKLN1	418250	1	3110330	intron-variant	ss538076581	AX-75425610	A/C	0.118916	0.349814	0.558379	0.137624	0.814394	0.0207864	0.180513	0.179206	0.376508	0.668607	0.679961	0.894562	0.350644	0.955218	0.226839	0.40846	0.169927	0.65812	0.408508	0.915511	0.337453	0.496446	0.411742	0.537808	0.992582	0.673304	0.41364	0.295058	0.277079	0.249243	0.239645	0.379285	0.306549	0.19447	0.229276	0.190611	0.253972	0.234089	0.25258	0.2625	0.246918
rs312827618	MKLN1	418250	1	3110846	intron-variant	ss538103111	AX-75425618	A/G	0.14223	0.778989	0.587015	0.649684	0.523971	0.168182	0.45249	0.93255	0.560602	0.984199	0.72644	0.940784	0.243559	0.378273	0.989345	0.234184	0.572595	0.767439	0.231804	0.138243	0.505001	0.775541	0.559576	0.574496	0.454808	0.696163	0.00506409	0.00690065	0.00591113	0.00373268	0.00378059	0.00765769	0.00687708	0.00222004	0.00356574	0.00287919	0.0013872	0.00228701	0.00329799	0.00348285	0.00598523
rs315217261	MKLN1	418250	1	3113998	intron-variant	ss537776276	AX-75425673	A/G	0.255381	0.837914	0.830269	0.684002	0.787337	0.41576	0.184332	0.732215	0.811405	0.934035	0.954918	0.909221	0.0469922	0.500094	0.231152	0.65034	0.352706	0.16133	0.646345	0.19241	0.996236	0.957305	0.854718	0.528573	0.809806	0.775613	0.0733857	0.0839045	0.077301	0.0529151	0.0534671	0.0986156	0.0968105	0.0544014	0.0697975	0.0609212	0.0314471	0.0425054	0.051587	0.0522039	0.0721311
rs317742117	MKLN1	418250	1	3116735	intron-variant	ss537897087	AX-75425734	A/G	0.714949	0.357338	0.166796	0.704931	0.429218	0.889961	0.93703	0.636296	0.484108	0.638811	0.710434	0.694348	0.237259	0.33835	0.330836	0.137643	0.228917	0.663788	0.135662	0.032833	0.615663	0.832545	0.782923	0.297967	0.497508	0.535358	0.0355289	0.0735036	0.0724031	0.060809	0.0861834	0.0942032	0.0994901	0.0643171	0.0848541	0.0696667	0.0259747	0.0451588	0.0521558	0.0488034	0.0526849
rs14788823	MKLN1	418250	1	3119007	intron-variant	ss538057924	AX-75425772	C/T	0.242836	0.497537	0.306258	0.457448	0.828145	0.0804816	0.0773866	0.536025	0.826635	0.420854	0.544606	0.61428	0.129489	0.869324	0.900665	0.160238	0.408927	0.365015	0.160263	0.561527	0.495585	0.844771	0.451963	0.608954	0.924887	0.980219	0.948088	0.868347	0.851612	0.711507	0.664295	0.879785	0.771525	0.606163	0.609151	0.568669	0.648223	0.61882	0.633645	0.641072	0.618432
rs316158234	MKLN1	418250	1	3121655	intron-variant	ss538138743	AX-75425818	G/T	0.581925	0.242495	0.198299	0.814874	0.404083	0.571781	0.916898	0.650812	0.55688	0.923312	0.539609	0.933874	0.421864	0.282234	0.753278	0.086848	0.298054	0.609458	0.0853794	0.095738	0.819637	0.91395	0.771742	0.343194	0.249998	0.734526	0.0118529	0.028744	0.0284693	0.0182515	0.0250598	0.0254644	0.0249694	0.0117646	0.0157724	0.0134711	0.0044625	0.0092248	0.0112064	0.0103476	0.0119587
rs313689982	MKLN1	418250	1	3122798	intron-variant	ss537895305	AX-75425839	C/T	0.118916	0.349814	0.558379	0.137624	0.814394	0.0207864	0.191796	0.179206	0.376508	0.668607	0.661837	0.894562	0.350644	0.955218	0.226839	0.40846	0.169927	0.65812	0.408508	0.915511	0.337453	0.496446	0.411742	0.537808	0.951533	0.673304	0.415817	0.298255	0.280752	0.252153	0.242242	0.380689	0.303992	0.18738	0.218476	0.180969	0.240828	0.221004	0.23773	0.245809	0.230508
rs312817930	MKLN1	418250	1	3124214	intron-variant	ss537808257	AX-75425871	G/T	0.581925	0.242495	0.198299	0.814874	0.404083	0.571781	0.952646	0.650812	0.55688	0.923312	0.562208	0.933874	0.421864	0.282234	0.753278	0.086848	0.298054	0.609458	0.0853794	0.095738	0.819637	0.91395	0.771742	0.343194	0.250967	0.734526	0.0110743	0.027067	0.0267871	0.0170272	0.0234761	0.0238463	0.0234228	0.0110265	0.014904	0.0127389	0.00420098	0.00868499	0.0105016	0.00962874	0.0110298
rs316560539	MKLN1	418250	1	3129106	intron-variant	ss538177743	AX-75425979	C/T	0.278782	0.455739	0.780145	0.692728	0.867592	0.101389	0.310735	0.249046	0.439979	0.903922	0.55549	0.829785	0.233499	0.890438	0.725164	0.479197	0.388514	0.662234	0.479242	0.59971	0.827138	0.591563	0.803617	0.886354	0.640682	0.317864	0.683543	0.534997	0.509107	0.41873	0.444837	0.65797	0.585543	0.451418	0.502717	0.50448	0.568356	0.533892	0.559873	0.571371	0.54226
rs317881902	MKLN1	418250	1	3135031	intron-variant	ss537912203	AX-75426091	C/T	0.714949	0.357338	0.166796	0.704931	0.429218	0.889961	0.866412	0.636296	0.484108	0.638811	0.653595	0.694348	0.237259	0.33835	0.330836	0.137643	0.228917	0.663788	0.135662	0.032833	0.615663	0.832545	0.782923	0.297967	0.497174	0.535358	0.0349491	0.0727233	0.0718117	0.0603094	0.0857054	0.0942964	0.100279	0.0650036	0.0856264	0.0699378	0.0260383	0.0448559	0.0513957	0.0477558	0.0504831
rs13823784	MKLN1	418250	1	3136782	intron-variant	ss538008742	AX-75426123	A/G	0.162312	0.0621411	0.0955733	0.899908	0.991927	0.322367	0.790417	0.163866	0.587185	0.954608	0.544706	0.70589	0.989554	0.864593	0.0989783	0.00724078	0.00356496	0.520389	0.00716504	0.251207	0.35798	0.949233	0.759023	0.145635	0.404294	0.58055	0.432307	0.481803	0.479297	0.45735	0.580818	0.507863	0.574385	0.562415	0.495334	0.586674	0.693566	0.581655	0.697142	0.723771	0.703618
rs312647469	MIR29B-1	777795	1	3327033	upstream-variant-2KB	ss538009085	AX-75429874	A/G	0.162095	0.606187	0.613617	0.808938	0.755308	0.0479475	0.459281	0.91104	0.840598	0.806736	0.292126	0.747895	0.831759	0.838646	0.735929	0.325278	0.434445	0.991156	0.325233	0.523546	0.581058	0.331823	0.713992	0.987999	0.442017	0.969923	0.651185	0.504404	0.465476	0.378148	0.406081	0.535105	0.520092	0.461739	0.378792	0.433024	0.559553	0.483622	0.54505	0.588542	0.711152
rs316667947	MIR29A	777794	1	3329461	upstream-variant-2KB	ss537736254	AX-75429924	A/G	0.183315	0.812466	0.709449	0.804306	0.866438	0.0866101	0.901883	0.675775	0.76126	0.883661	0.181598	0.747716	0.453523	0.991173	0.723273	0.274925	0.373679	0.949582	0.274861	0.514854	0.668354	0.320626	0.884866	0.490288	0.816332	0.438225	0.624304	0.477054	0.426783	0.291234	0.278008	0.38016	0.397204	0.299944	0.22322	0.303758	0.485582	0.397292	0.447999	0.50474	0.60901
rs315758996	K123	395873	1	3362219	intron-variant	ss538117074	AX-75430668	A/G	0.55383	0.543034	0.750559	0.284252	0.889269	0.363669	0.122336	0.567675	0.861349	0.419721	0.312374	0.189872	0.334167	0.71468	0.973966	0.979626	0.949516	0.886431	0.979556	0.935996	0.733339	0.964159	0.621518	0.184625	0.720529	0.149428	0.781822	0.740916	0.755178	0.844377	0.96109	0.99603	0.961422	0.895845	0.863593	0.941033	0.904108	0.982577	0.97132	0.996807	0.921368
rs313737709	K123	395873	1	3363320	intron-variant	ss537904141	AX-75430696	A/G	0.790575	0.899695	0.441871	0.388201	0.398886	0.249805	0.297785	0.957702	0.880634	0.607994	0.440962	0.528411	0.372008	0.167038	0.800372	0.466972	0.744081	0.515007	0.467057	0.261516	0.402696	0.702296	0.967778	0.753286	0.533691	0.316072	0.441291	0.517092	0.50464	0.615295	0.68421	0.55244	0.47182	0.386523	0.51586	0.481509	0.386485	0.501674	0.481251	0.461776	0.394067
rs317224010	K123	395873	1	3365089	intron-variant	ss538249277	AX-75430744	C/T	0.626818	0.195725	0.12251	0.806196	0.525351	0.694635	0.740572	0.0627556	0.416449	0.792239	0.347011	0.780199	0.235276	0.975395	0.290308	0.0381526	0.0390338	0.90298	0.0378518	0.49855	0.25719	0.411716	0.722831	0.284037	0.444702	0.587265	0.673926	0.846657	0.882985	0.992742	0.764727	0.951303	0.970325	0.731349	0.871492	0.830744	0.814141	0.866213	0.768271	0.761625	0.832868
rs315557538	K123	395873	1	3365641	intron-variant	ss538268864	AX-75430759	C/T	0.751724	0.840168	0.329252	0.509296	0.385522	0.705013	0.392569	0.946891	0.370626	0.856112	0.746737	0.787674	0.865518	0.330636	0.485648	0.379788	0.662817	0.248495	0.379858	0.0758898	0.570717	0.319045	0.447521	0.740594	0.993712	0.489916	0.240077	0.262636	0.247779	0.33874	0.369675	0.281143	0.300882	0.263213	0.320681	0.302235	0.333788	0.353129	0.36725	0.36869	0.368594
rs317218417	K123	395873	1	3367703	intron-variant	ss537808494	AX-75430804	C/T	0.415318	0.12247	0.0543607	0.783671	0.29492	0.228225	0.352123	0.119128	0.516623	0.677925	0.752329	0.345833	0.21114	0.425587	0.195413	0.361216	0.0571346	0.315829	0.359639	0.925113	0.704553	0.331144	0.868707	0.233687	0.979094	0.837482	0.678826	0.586179	0.552497	0.521527	0.396519	0.538189	0.42956	0.280471	0.414248	0.369704	0.297591	0.411002	0.341062	0.327959	0.335932
rs317756376	K123	395873	1	3369462	intron-variant	ss538214003	AX-75430843	A/G	0.287995	0.071402	0.114966	0.956389	0.497152	0.126446	0.601779	0.0946614	0.80066	0.718271	0.518777	0.368833	0.192428	0.738529	0.299597	0.140414	0.0649977	0.635683	0.139545	0.419784	0.471479	0.597787	0.532587	0.261223	0.836656	0.860492	0.907903	0.954069	0.926118	0.81001	0.618747	0.851001	0.708437	0.514388	0.674037	0.624004	0.493761	0.637361	0.528514	0.510562	0.526925
rs314221846	K123	395873	1	3369941	reference,synonymous-codon	ss538222297	AX-75430848	A/G	0.55383	0.543034	0.750559	0.284252	0.889269	0.363669	0.155062	0.567675	0.861349	0.419721	0.557826	0.189872	0.334167	0.71468	0.973966	0.979626	0.949516	0.886431	0.979556	0.935996	0.733339	0.964159	0.621518	0.184625	0.503048	0.149428	0.792922	0.754521	0.769628	0.872179	0.990448	0.970823	0.977692	0.88918	0.86124	0.951009	0.904118	0.960133	0.996079	0.983609	0.941584
rs14788532	IL2RA	395294	1	3379670	intron-variant	ss537902811	AX-75431057	A/G	0.0663467	0.472378	0.960867	0.61309	0.277605	0.129276	0.14917	0.218314	0.882675	0.20902	0.666721	0.129872	0.592934	0.862811	0.439732	0.100411	0.192656	0.917366	0.099312	0.447241	0.448172	0.665952	0.615471	0.199414	0.582532	0.814485	0.38115	0.448411	0.470595	0.488875	0.686674	0.629573	0.59377	0.574356	0.649991	0.484262	0.430881	0.459059	0.57653	0.606749	0.680894
rs315796283	IL2RA	395294	1	3381126	intron-variant	ss537935510	AX-75431090	A/G	0.0416857	0.40671	0.88673	0.548956	0.239669	0.103834	0.146861	0.23568	0.790878	0.195686	0.737069	0.123127	0.572939	0.872249	0.369415	0.117043	0.175708	0.920508	0.115799	0.434407	0.440405	0.623992	0.545597	0.216324	0.575171	0.808448	0.353452	0.419203	0.442073	0.460424	0.654386	0.599845	0.565385	0.546178	0.620683	0.457513	0.403921	0.429443	0.539924	0.567436	0.633586
rs316918963	IL2RA	395294	1	3382091	intron-variant	ss538039992	AX-75431114	G/T	0.354832	0.465039	0.265431	0.520873	0.174243	0.787293	0.736032	0.919748	0.866134	0.513215	0.539721	0.563866	0.107835	0.698145	0.777967	0.438271	0.80611	0.416963	0.439688	0.600803	0.768169	0.974034	0.607783	0.619985	0.754224	0.919611	0.208289	0.167858	0.16656	0.164586	0.198347	0.323928	0.207276	0.123748	0.282367	0.159152	0.107605	0.164361	0.18699	0.198455	0.23487
rs13823495	IL2RA	395294	1	3382659	intron-variant	ss538042764	AX-75431129	C/T	0.147	0.103307	0.193488	0.655461	0.891394	0.0737805	0.0983142	0.172784	0.650282	0.396579	0.931884	0.21316	0.293128	0.646325	0.334683	0.138432	0.0889195	0.711228	0.13613	0.472473	0.186374	0.802042	0.859694	0.375268	0.989814	0.760321	0.973706	0.82451	0.814421	0.844849	0.635565	0.908482	0.79408	0.672941	0.962915	0.871463	0.78403	0.890076	0.76776	0.746546	0.706267
rs312385392	IL2RA	395294	1	3385275	intron-variant	ss538180472	AX-75431183	G/T	0.147	0.103307	0.193488	0.655461	0.891394	0.0737805	0.0935614	0.172784	0.650282	0.396579	0.880128	0.21316	0.293128	0.646325	0.334683	0.138432	0.0889195	0.711228	0.13613	0.472473	0.186374	0.802042	0.859694	0.375268	0.959593	0.760321	0.963765	0.892997	0.890034	0.927325	0.717417	0.994885	0.903826	0.801517	0.906995	0.997598	0.902613	0.993011	0.875849	0.84224	0.788664
rs314119280	IL2RA	395294	1	3385599	intron-variant	ss537997861	AX-75431190	C/T	0.125089	0.0665869	0.358107	0.149658	0.668907	0.178715	0.124532	0.0945087	0.512939	0.440685	0.383026	0.200228	0.445178	0.674811	0.395065	0.0350634	0.121952	0.969105	0.0342735	0.11599	0.0327776	0.575001	0.751243	0.264935	0.757204	0.543754	0.657979	0.867963	0.871354	0.956176	0.7163	0.89917	0.931765	0.977236	0.818475	0.860267	0.822714	0.848731	0.985693	0.985536	0.991233
rs315657256	IL2RA	395294	1	3389667	intron-variant	ss537763709	AX-80740205	A/T	0.27929	0.0568315	0.332286	0.421551	0.819596	0.358526	0.175669	0.109986	0.836676	0.557803	0.275261	0.281253	0.338311	0.810405	0.270666	0.117838	0.104429	0.669217	0.115664	0.275973	0.1959	0.789369	0.912496	0.248636	0.692928	0.88385	0.63071	0.899536	0.929006	0.905892	0.63006	0.913539	0.973151	0.774984	0.964737	0.955357	0.993017	0.999716	0.871382	0.876533	0.884986
rs15184845	IL2RA	395294	1	3393535	utr-variant-5-prime	ss537947320	AX-75431335	C/T	0.173032	0.574439	0.512612	0.101811	0.195886	0.135259	0.0349411	0.916375	0.872884	0.267824	0.96983	0.226938	0.758993	0.788413	0.694671	0.331625	0.863838	0.390395	0.327054	0.172783	0.0896263	0.0583533	0.777747	0.75261	0.626489	0.943398	0.384064	0.438747	0.412085	0.380521	0.50241	0.3771	0.327154	0.271762	0.197557	0.197835	0.156398	0.201574	0.22829	0.228024	0.307484
rs314820130	IL2RA	395294	1	3395176	upstream-variant-2KB	ss538154337	AX-75431371	A/G	0.564988	0.512939	0.259615	0.766275	0.188112	0.784083	0.976153	0.97313	0.655277	0.639004	0.579739	0.710094	0.102479	0.784999	0.971296	0.856991	0.813746	0.838393	0.859042	0.7559	0.719196	0.508572	0.803953	0.588823	0.531984	0.561919	0.363694	0.337826	0.352956	0.390681	0.419021	0.590259	0.455813	0.347794	0.653312	0.394767	0.28936	0.375963	0.399072	0.405646	0.432483
rs317728036	ITIH2	419110	1	4101655	upstream-variant-2KB	ss538049976	AX-75449713	A/G	0.02263	0.34928	0.665425	0.156991	0.145482	0.00574137	0.255241	0.733634	0.0854572	0.821284	0.533849	0.636802	0.430504	0.684837	0.0336523	0.495796	0.397736	0.00388053	0.495847	0.46822	0.645038	0.771227	0.802245	0.974768	0.671703	0.664728	0.355568	0.371132	0.381422	0.454742	0.747036	0.494718	0.389454	0.433748	0.426082	0.362106	0.274476	0.24949	0.313197	0.323483	0.305217
rs313055262	ITIH2	419110	1	4103986	intron-variant	ss537825217	AX-75449742	A/G	0.345452	0.494972	0.599631	0.385163	0.281299	0.38083	0.523832	0.8537	0.188517	0.715292	0.468267	0.427623	0.346842	0.790884	0.324906	0.960427	0.555347	0.14824	0.964472	0.403151	0.444216	0.683834	0.974045	0.792757	0.784702	0.425941	0.271221	0.261575	0.276382	0.46949	0.713811	0.612699	0.451411	0.563206	0.688325	0.465601	0.343702	0.329921	0.384995	0.411341	0.435076
rs313901738	ITIH2	419110	1	4108129	intron-variant	ss538083574	AX-75449812	A/G	0.951875	0.732501	0.73621	0.689793	0.611805	0.739747	0.10483	0.872037	0.303771	0.985008	0.629529	0.895919	0.379317	0.621019	0.504593	0.340943	0.837069	0.268815	0.337086	0.973802	0.804423	0.562157	0.826703	0.870054	0.683522	0.909008	0.640418	0.488482	0.486097	0.650823	0.790399	0.846793	0.855053	0.655689	0.848285	0.580106	0.520129	0.443955	0.408452	0.415848	0.485777
rs313390558	ITIH2	419110	1	4109278	intron-variant	ss538064670	AX-75449835	A/G	0.109046	0.23784	0.965159	0.320963	0.368169	0.045935	0.67637	0.612771	0.141943	0.568302	0.695488	0.41371	0.365048	0.841796	0.169941	0.613956	0.741304	0.0321352	0.617595	0.577725	0.673477	0.914964	0.468147	0.975988	0.91337	0.981217	0.283402	0.259495	0.269148	0.416694	0.755476	0.55123	0.401123	0.452643	0.499008	0.349701	0.255943	0.214763	0.268603	0.296679	0.277004
rs317197109	ITIH2	419110	1	4111831	intron-variant	ss537736011	AX-75449901	A/G	0.341971	0.914626	0.739139	0.532534	0.695889	0.393157	0.00354157	0.964346	0.728928	0.593768	0.675172	0.632262	0.986114	0.923138	0.563639	0.753198	0.62672	0.635611	0.746275	0.860875	0.846697	0.952184	0.266161	0.670338	0.537121	0.567846	0.808225	0.692147	0.698391	0.937087	0.92053	0.840838	0.953267	0.932384	0.808839	0.979262	0.936118	0.855119	0.848019	0.908893	0.890489
rs315930536	ITIH2	419110	1	4112976	intron-variant	ss537982240	AX-80773847	A/T	0.315789	0.615789	0.739926	0.206451	0.412655	0.221126	0.614626	0.932238	0.519499	0.675093	0.224713	0.439045	0.694634	0.522249	0.110114	0.444143	0.416314	0.0142996	0.444137	0.341357	0.504172	0.375874	0.846218	0.868798	0.989875	0.343707	0.356785	0.438545	0.46591	0.621698	0.820466	0.66197	0.470696	0.750229	0.757395	0.680724	0.552944	0.58978	0.70384	0.734192	0.698671
rs317191314	ITIH2	419110	1	4113336	intron-variant	ss538262435	AX-75449934	A/G	0.322638	0.709848	0.56642	0.253327	0.502061	0.276165	0.648324	0.836396	0.425528	0.993039	0.370016	0.746884	0.862088	0.545644	0.0936418	0.638519	0.326021	0.0190964	0.63852	0.390083	0.290077	0.524006	0.782988	0.975325	0.95055	0.275207	0.283827	0.352747	0.374687	0.511077	0.700846	0.552083	0.381792	0.650371	0.661326	0.589653	0.46734	0.508618	0.623304	0.655043	0.630242
rs312687539	ITIH2	419110	1	4117636	intron-variant	ss538119561	AX-80848274	C/G	0.42145	0.627216	0.845952	0.168422	0.722813	0.240634	0.69682	0.92541	0.632454	0.721085	0.129218	0.449151	0.697406	0.569168	0.149421	0.44058	0.491734	0.0235104	0.440564	0.368272	0.686447	0.417805	0.764428	0.795058	0.917112	0.301104	0.282065	0.349647	0.375081	0.545292	0.662228	0.539049	0.37066	0.681206	0.675831	0.586635	0.515517	0.551265	0.644396	0.653981	0.594393
rs13827441	ITIH2	419110	1	4118524	reference,synonymous-codon	ss538263291	AX-75450042	C/T	0.125444	0.457512	0.841526	0.0940834	0.653619	0.0164145	0.628485	0.857709	0.366169	0.636189	0.255475	0.526695	0.833847	0.53055	0.0363798	0.264535	0.540937	0.00154619	0.264551	0.419135	0.945466	0.460965	0.274764	0.816512	0.8282	0.755092	0.350016	0.407619	0.428148	0.551399	0.793358	0.539672	0.372511	0.622307	0.535258	0.508075	0.461743	0.438997	0.545745	0.568622	0.444159
rs13827437	ITIH2	419110	1	4119901	intron-variant	ss537925668	AX-75450081	G/T	0.760059	0.766873	0.162855	0.212056	0.549872	0.797797	0.593472	0.684353	0.315136	0.963712	0.826802	0.671251	0.189063	0.569905	0.391813	0.265387	0.182047	0.573604	0.262187	0.830341	0.506257	0.894581	0.843497	0.571838	0.669756	0.140839	0.180778	0.107199	0.107201	0.234624	0.204814	0.318938	0.193228	0.2124	0.319741	0.163403	0.111679	0.137042	0.135266	0.134345	0.177913
rs314002366	ITIH2	419110	1	4125047	intron-variant	ss537765836	AX-80905251	C/G	0.317631	0.730458	0.133936	0.828991	0.848237	0.0776151	0.339382	0.589788	0.817958	0.710976	0.41461	0.873402	0.275098	0.276951	0.351718	0.0443574	0.448611	0.0360403	0.0436006	0.636917	0.56413	0.62125	0.257814	0.466173	0.813833	0.268424	0.714078	0.476796	0.465448	0.641358	0.405149	0.796765	0.7563	0.552615	0.81698	0.553799	0.470139	0.546978	0.436794	0.409921	0.595549
rs316900206	ATP5C1	419108	1	4143938	upstream-variant-2KB	ss537779637	AX-75450601	A/C	0.65012	0.919635	0.0577319	0.288424	0.592211	0.718919	0.372195	0.758681	0.4666	0.8036	0.811835	0.852352	0.196137	0.392815	0.233464	0.403693	0.145002	0.368523	0.400984	0.467685	0.585539	0.993773	0.537491	0.426841	0.568201	0.0727374	0.182998	0.108861	0.104338	0.160024	0.170405	0.270196	0.150304	0.140663	0.210768	0.131892	0.0675169	0.0853811	0.092326	0.0947978	0.137322
rs29008174	ATP5C1	419108	1	4146458	reference,synonymous-codon	ss537844810	AX-75450660	C/T	0.349859	0.889759	0.106888	0.335996	0.779256	0.0912619	0.325325	0.618918	0.152361	0.830134	0.987552	0.774367	0.488408	0.584628	0.0432268	0.964451	0.155671	0.0239307	0.964517	0.489835	0.942652	0.873272	0.650089	0.789815	0.220654	0.423429	0.328761	0.260995	0.252563	0.309154	0.305953	0.325257	0.193711	0.219327	0.208222	0.193596	0.140579	0.168114	0.196364	0.208875	0.212205
rs317340311	ATP5C1	419108	1	4149567	intron-variant	ss537719187	AX-75450727	C/T	0.0426652	0.516064	0.736444	0.406025	0.596108	0.00443954	0.018401	0.839275	0.464905	0.632693	0.606672	0.393989	0.744568	0.875621	0.0891405	0.395437	0.626991	0.0404344	0.391187	0.780684	0.67669	0.960538	0.584618	0.419117	0.335093	0.489703	0.89892	0.858514	0.891478	0.796388	0.849517	0.608239	0.721711	0.625534	0.438901	0.692915	0.773426	0.77051	0.84336	0.832277	0.775097
rs312436687	TAF3	419107	1	4152401	upstream-variant-2KB	ss537937548	AX-75450785	G/T	0.135107	0.848863	0.0733431	0.253696	0.345252	0.0521843	0.167046	0.638839	0.0562076	0.66666	0.817227	0.780572	0.332698	0.557291	0.0436929	0.683239	0.124172	0.0459778	0.68329	0.632526	0.638286	0.740986	0.82231	0.795141	0.290091	0.165817	0.293087	0.205345	0.196977	0.243319	0.257978	0.27674	0.18993	0.154056	0.175228	0.132248	0.0919476	0.104926	0.118718	0.121863	0.154493
rs14791475	TAF3	419107	1	4156000	intron-variant	ss538059321	AX-75450854	C/T	0.516896	0.599582	0.156042	0.68585	0.932979	0.416883	0.711683	0.392989	0.880956	0.695757	0.170375	0.597055	0.567831	0.253991	0.982308	0.0964552	0.225093	0.311555	0.0957671	0.414956	0.844139	0.770965	0.637882	0.756976	0.25623	0.389603	0.878602	0.88308	0.852609	0.863583	0.511952	0.892401	0.837928	0.632382	0.709066	0.668353	0.628124	0.748705	0.644023	0.606751	0.730977
rs314856778	TAF3	419107	1	4157936	intron-variant	ss538190129	AX-75450890	G/T	0.577	0.779825	0.24527	0.819125	0.75565	0.328674	0.485218	0.683629	0.773549	0.950633	0.194887	0.94128	0.442931	0.344051	0.707237	0.0743967	0.491762	0.175192	0.0731706	0.515692	0.625358	0.628383	0.567845	0.432661	0.640406	0.323547	0.992782	0.698337	0.682294	0.826777	0.655711	0.984619	0.956995	0.661948	0.857472	0.617942	0.545388	0.5608	0.459493	0.441104	0.567117
rs315729231	TAF3	419107	1	4160177	intron-variant	ss537741197	AX-75450939	A/G	0.57169	0.784379	0.256762	0.800134	0.767313	0.338765	0.49839	0.701678	0.810981	0.976146	0.188118	0.908404	0.430768	0.317121	0.705543	0.0784906	0.500184	0.183329	0.0772077	0.5237	0.609172	0.639406	0.547138	0.414392	0.655926	0.329086	0.967184	0.674121	0.658591	0.803222	0.635266	0.991429	0.933052	0.627262	0.834114	0.596191	0.522828	0.539116	0.440252	0.422443	0.548328
rs317372015	TAF3	419107	1	4160216	intron-variant	ss538190100	AX-75450940	A/G	0.193355	0.579842	0.478473	0.878664	0.0995432	0.530084	0.231554	0.71108	0.13103	0.493571	0.486069	0.687953	0.284083	0.702828	0.864591	0.465631	0.858341	0.510911	0.465591	0.797097	0.566971	0.68007	0.126244	0.518906	0.891813	0.556224	0.725898	0.586678	0.571784	0.588418	0.651217	0.647687	0.74568	0.464386	0.600245	0.44722	0.405162	0.389278	0.362211	0.335729	0.477743
rs315082091	TAF3	419107	1	4165338	intron-variant	ss538094226	AX-75451058	A/G	0.227222	0.680563	0.27685	0.924691	0.124608	0.711328	0.322539	0.603424	0.147596	0.211628	0.425494	0.346996	0.338473	0.610464	0.950486	0.685488	0.932033	0.71437	0.685469	0.821828	0.800647	0.402008	0.122601	0.419993	0.964021	0.588459	0.689611	0.557007	0.543829	0.558601	0.613794	0.606538	0.68933	0.424635	0.547562	0.411535	0.376725	0.355116	0.33162	0.311063	0.458827
rs315946514	TAF3	419107	1	4165588	intron-variant	ss538189576	AX-75451064	A/G	0.227222	0.680563	0.27685	0.924691	0.124608	0.711328	0.319714	0.603424	0.147596	0.211628	0.429709	0.346996	0.338473	0.610464	0.950486	0.685488	0.932033	0.71437	0.685469	0.821828	0.800647	0.402008	0.122601	0.419993	0.957638	0.588459	0.699627	0.566001	0.552626	0.567578	0.623708	0.617389	0.702895	0.436782	0.562202	0.423878	0.387967	0.366343	0.342655	0.321817	0.472971
rs13827375	TAF3	419107	1	4170874	intron-variant	ss537821519	AX-75451184	A/C	0.922437	0.873402	0.13488	0.68782	0.47129	0.720045	0.355078	0.606895	0.552449	0.501891	0.123397	0.525514	0.317288	0.268292	0.948878	0.0879277	0.284112	0.253527	0.0874009	0.42898	0.663138	0.663369	0.247463	0.564546	0.302629	0.319755	0.953221	0.679362	0.647674	0.666294	0.422946	0.72297	0.731276	0.433413	0.557501	0.45107	0.400625	0.475513	0.390074	0.352537	0.513797
rs15191619	TAF3	419107	1	4172778	intron-variant	ss537849681	AX-75451218	A/G	0.263444	0.738663	0.603482	0.642049	0.515473	0.120903	0.67204	0.718223	0.0821795	0.778801	0.595985	0.592514	0.576191	0.879941	0.208672	0.608859	0.855984	0.0543545	0.610636	0.282195	0.79212	0.839422	0.644191	0.906238	0.85765	0.655641	0.339098	0.314784	0.322504	0.463049	0.785223	0.583276	0.425323	0.476217	0.519832	0.371767	0.290083	0.236489	0.290189	0.325598	0.300127
rs13827371	TAF3	419107	1	4174687	intron-variant	ss537765811	AX-75451263	C/T	0.193355	0.579842	0.478473	0.878664	0.0995432	0.530084	0.231554	0.71108	0.13103	0.493571	0.486069	0.687953	0.284083	0.702828	0.864591	0.465631	0.858341	0.510911	0.465591	0.797097	0.566971	0.68007	0.126244	0.518906	0.891813	0.556224	0.725898	0.586678	0.571784	0.588418	0.651217	0.647687	0.74568	0.464386	0.600245	0.44722	0.405162	0.389278	0.362211	0.335729	0.477743
rs317251618	TAF3	419107	1	4182773	intron-variant	ss537997914	AX-75451461	A/G	0.736256	0.989639	0.216354	0.485928	0.416402	0.860197	0.892482	0.553506	0.090158	0.686244	0.799998	0.427355	0.747017	0.769693	0.964376	0.315074	0.809801	0.586265	0.313406	0.581136	0.380741	0.931493	0.180361	0.325315	0.94428	0.606053	0.880867	0.995302	0.994954	0.901694	0.599281	0.575212	0.572175	0.833941	0.691128	0.940949	0.945137	0.81381	0.771653	0.780847	0.847968
rs317924158	TAF3	419107	1	4185507	intron-variant	ss538261274	AX-75451529	A/G	0.393911	0.782543	0.109029	0.257797	0.290504	0.247209	0.898483	0.970945	0.0513847	0.951788	0.784797	0.875087	0.383409	0.527762	0.139742	0.564914	0.253297	0.140268	0.561379	0.551251	0.564238	0.90408	0.964971	0.586039	0.356381	0.293782	0.488212	0.338689	0.335711	0.476208	0.625405	0.686972	0.478435	0.384867	0.446006	0.28291	0.198425	0.186858	0.191094	0.196749	0.210524
rs315800242	TAF3	419107	1	4186970	intron-variant	ss537934327	AX-75451558	A/G	0.416357	0.214279	0.0279386	0.732434	0.815538	0.234005	0.9406	0.43637	0.983627	0.5018	0.253269	0.424781	0.546685	0.217439	0.664553	0.111468	0.146323	0.569858	0.110707	0.891929	0.987304	0.7325	0.635732	0.733711	0.323657	0.417697	0.646332	0.456876	0.434402	0.440641	0.210699	0.477752	0.4435	0.312214	0.365155	0.343003	0.322289	0.396773	0.332122	0.316147	0.412325
rs13827363	TAF3	419107	1	4190336	intron-variant	ss537833585	AX-75451626	A/G	0.103019	0.248451	0.651737	0.209449	0.961271	0.00851009	0.584157	0.683106	0.386827	0.730572	0.303102	0.666433	0.678779	0.645742	0.107256	0.223695	0.790625	0.00698405	0.223718	0.577772	0.850408	0.800437	0.320043	0.749399	0.815171	0.914441	0.687497	0.741938	0.755471	0.797997	0.947037	0.751834	0.554471	0.832447	0.728445	0.700458	0.639668	0.632945	0.761306	0.795973	0.657593
rs313203169	TAF3	419107	1	4191385	intron-variant	ss537916661	AX-75451643	C/T	0.191897	0.253315	0.109783	0.97389	0.864645	0.130271	0.428427	0.437523	0.599352	0.708055	0.592547	0.742028	0.91977	0.316354	0.98042	0.118151	0.382927	0.394105	0.116882	0.996862	0.671936	0.926875	0.901337	0.793275	0.389843	0.392682	0.960968	0.75283	0.74406	0.824171	0.754	0.86687	0.942717	0.807533	0.918991	0.771239	0.676242	0.669848	0.577092	0.574558	0.630211
rs316193183	TAF3	419107	1	4194746	intron-variant	ss537965006	AX-75451703	A/G	0.57334	0.452069	0.0140774	0.945354	0.198512	0.319685	0.904881	0.675736	0.0780176	0.917257	0.734921	0.822912	0.776437	0.2228	0.826482	0.219533	0.600682	0.363647	0.219562	0.693994	0.524944	0.897755	0.347521	0.402631	0.405422	0.209138	0.755034	0.607401	0.597949	0.687939	0.67394	0.906267	0.944682	0.592525	0.673354	0.47292	0.359523	0.349194	0.276275	0.255406	0.358928
rs15191574	TAF3	419107	1	4199290	intron-variant	ss537974717	AX-80954179	A/T	0.364621	0.792009	0.175458	0.209975	0.294147	0.21269	0.779981	0.742541	0.0437925	0.715435	0.940254	0.643578	0.387156	0.551813	0.120694	0.503915	0.218469	0.136986	0.500585	0.830585	0.641919	0.944151	0.809387	0.960153	0.321238	0.329676	0.577247	0.406363	0.403375	0.500366	0.665756	0.754977	0.567055	0.490679	0.571365	0.377345	0.264349	0.251276	0.250428	0.254029	0.261046
rs314670492	TAF3	419107	1	4199819	intron-variant	ss538135074	AX-75451815	C/T	0.208028	0.281034	0.0572368	0.786006	0.549248	0.109373	0.604201	0.37772	0.223113	0.528928	0.856776	0.577176	0.686954	0.284771	0.7256	0.280589	0.70409	0.348832	0.280634	0.842276	0.626958	0.696352	0.984708	0.768694	0.516887	0.273626	0.674162	0.578595	0.569867	0.661328	0.615104	0.868583	0.840083	0.596881	0.612116	0.465448	0.361688	0.366735	0.298938	0.289535	0.336484
rs314351046	TAF3	419107	1	4201527	intron-variant	ss537803105	AX-75451854	C/T	0.508457	0.443567	0.012556	0.939349	0.237767	0.280034	0.998822	0.751029	0.0755243	0.994305	0.54296	0.882966	0.858777	0.255127	0.868547	0.194951	0.548855	0.365058	0.194977	0.685072	0.532868	0.895407	0.311289	0.388279	0.462043	0.238324	0.69353	0.54594	0.532168	0.615688	0.598704	0.817701	0.836219	0.491012	0.565099	0.381059	0.284764	0.280376	0.220953	0.206807	0.294401
rs315038712	TAF3	419107	1	4201629	intron-variant	ss537852202	AX-75451857	C/T	0.227222	0.680563	0.27685	0.924691	0.124608	0.711328	0.313151	0.603424	0.147596	0.211628	0.427528	0.346996	0.338473	0.610464	0.950486	0.685488	0.932033	0.71437	0.685469	0.821828	0.800647	0.402008	0.122601	0.419993	0.939416	0.588459	0.693714	0.560238	0.546612	0.561412	0.616652	0.609849	0.694072	0.429495	0.553548	0.416354	0.381299	0.359896	0.336739	0.316467	0.466462
rs318056765	TAF3	419107	1	4206228	intron-variant	ss538083729	AX-75451958	A/G	0.240634	0.281515	0.359239	0.545465	0.585577	0.0213144	0.682909	0.974708	0.658378	0.942187	0.857394	0.962342	0.607077	0.54481	0.0961011	0.451668	0.600721	0.0149028	0.454948	0.943467	0.982426	0.796483	0.400543	0.506635	0.790513	0.992899	0.635944	0.596004	0.605702	0.617483	0.991874	0.824816	0.606527	0.84102	0.872042	0.778244	0.689314	0.663772	0.787792	0.851545	0.725797
rs312647638	TAF3	419107	1	4210933	intron-variant	ss537935948	AX-75452053	C/T	0.198783	0.188472	0.0103807	0.737015	0.523108	0.109188	0.455691	0.627877	0.349319	0.554492	0.900404	0.518435	0.887463	0.127618	0.919827	0.280412	0.568387	0.492133	0.280469	0.543053	0.986573	0.832469	0.872054	0.424246	0.555117	0.329253	0.796137	0.689846	0.687247	0.805273	0.67223	0.949866	0.915389	0.713133	0.707877	0.536695	0.480054	0.481648	0.384833	0.358004	0.399496
rs317377492	TAF3	419107	1	4215850	intron-variant	ss538233783	AX-75452160	G/T	0.198783	0.188472	0.0103807	0.737015	0.523108	0.109188	0.473181	0.627877	0.349319	0.554492	0.870638	0.518435	0.887463	0.127618	0.919827	0.280412	0.568387	0.492133	0.280469	0.543053	0.986573	0.832469	0.872054	0.424246	0.515646	0.329253	0.812394	0.706157	0.704114	0.823835	0.688496	0.965484	0.925182	0.717371	0.70972	0.537019	0.482021	0.481695	0.385129	0.358589	0.400342
rs80628964	TAF3	419107	1	4217136	intron-variant	ss537750095	AX-75452187	A/G	0.198783	0.188472	0.0103807	0.737015	0.523108	0.109188	0.473181	0.627877	0.349319	0.554492	0.870638	0.518435	0.887463	0.127618	0.919827	0.280412	0.568387	0.492133	0.280469	0.543053	0.986573	0.832469	0.872054	0.424246	0.515646	0.329253	0.812394	0.706157	0.704114	0.823835	0.688496	0.965484	0.925182	0.717371	0.70972	0.537019	0.482021	0.481695	0.385129	0.358589	0.400342
rs315368905	TAF3	419107	1	4218740	intron-variant	ss538235689	AX-75452216	C/T	0.519949	0.338962	0.0175377	0.958403	0.312798	0.15521	0.474807	0.556046	0.50342	0.645615	0.70989	0.40655	0.529907	0.184564	0.59789	0.357629	0.923935	0.256686	0.357694	0.461094	0.489579	0.795026	0.293145	0.205912	0.474869	0.61311	0.396528	0.285698	0.275909	0.315092	0.234795	0.405344	0.473203	0.286707	0.352984	0.222467	0.225379	0.21312	0.160359	0.150847	0.217092
rs314393305	TAF3	419107	1	4219779	intron-variant	ss537722032	AX-75452238	A/G	0.544848	0.217107	0.03384	0.649348	0.558464	0.298664	0.821662	0.314626	0.930266	0.79917	0.231152	0.676244	0.426795	0.271449	0.646871	0.0801461	0.123829	0.529259	0.079555	0.717041	0.771697	0.917675	0.616219	0.829133	0.234895	0.365846	0.688643	0.491417	0.467112	0.471114	0.228712	0.50669	0.465784	0.321068	0.372303	0.346955	0.323852	0.399836	0.333141	0.310628	0.395944
rs318052868	TAF3	419107	1	4222148	intron-variant	ss538074293	AX-75452292	C/T	0.180305	0.579335	0.311826	0.619312	0.935631	0.169368	0.154298	0.206637	0.249531	0.418524	0.189969	0.316879	0.685081	0.303957	0.214033	0.368565	0.121327	0.57661	0.366238	0.160245	0.622013	0.638896	0.983315	0.450092	0.686498	0.490696	0.65313	0.551179	0.526656	0.376598	0.215635	0.28966	0.290369	0.31328	0.373857	0.549337	0.611833	0.745686	0.80846	0.819052	0.878958
rs80614071	TAF3	419107	1	4223642	intron-variant	ss537866749	AX-75452326	C/T	0.825747	0.905121	0.325329	0.632586	0.390622	0.313551	0.450845	0.0654186	0.530937	0.398459	0.573185	0.184905	0.708783	0.295259	0.11801	0.782473	0.163344	0.139491	0.779855	0.198635	0.834413	0.644136	0.22773	0.279419	0.668256	0.566172	0.759883	0.774685	0.776074	0.823024	0.993289	0.912802	0.963366	0.844726	0.87535	0.645658	0.680268	0.562489	0.511381	0.505071	0.559309
rs314671994	TAF3	419107	1	4223831	intron-variant	ss537925049	AX-75452331	C/T	0.276563	0.491807	0.782994	0.821968	0.280905	0.977874	0.727175	0.281496	0.661286	0.763658	0.630093	0.441329	0.378945	0.809312	0.401254	0.508375	0.822032	0.134907	0.508353	0.817396	0.348588	0.914247	0.113199	0.52938	0.869011	0.962433	0.359424	0.304408	0.290277	0.227904	0.208965	0.222558	0.309254	0.198582	0.260528	0.212967	0.26772	0.246923	0.235007	0.234674	0.311177
rs14791436	TAF3	419107	1	4228645	intron-variant	ss537919912	AX-75452433	C/T	0.504843	0.381545	0.0192433	0.931966	0.281553	0.115529	0.774156	0.544736	0.603702	0.638592	0.773993	0.48153	0.40357	0.115778	0.3912	0.261278	0.93229	0.10379	0.261315	0.483539	0.663659	0.791784	0.199794	0.3256	0.523748	0.794376	0.642243	0.495642	0.470822	0.500629	0.376396	0.57348	0.616977	0.369098	0.430937	0.293943	0.298829	0.297599	0.234647	0.220554	0.308198
rs316170941	TAF3	419107	1	4235926	intron-variant	ss537873294	AX-75452582	C/T	0.559887	0.261715	0.0250587	0.966279	0.434294	0.322227	0.657172	0.227605	0.550793	0.620042	0.169828	0.479839	0.708964	0.560417	0.592403	0.0762501	0.109547	0.576404	0.0756824	0.746602	0.352078	0.967638	0.401802	0.950122	0.227386	0.283386	0.655057	0.476528	0.454234	0.447707	0.270897	0.553288	0.521571	0.335003	0.399863	0.382213	0.298176	0.358316	0.303618	0.295272	0.387036
rs318113417	TAF3	419107	1	4238189	intron-variant	ss537777506	AX-75452641	A/G	0.190305	0.423599	0.358418	0.465568	0.604289	0.0450172	0.858039	0.910711	0.950058	0.632412	0.674885	0.64539	0.709464	0.633655	0.10576	0.279828	0.753455	0.00906929	0.282328	0.678828	0.475689	0.508168	0.242787	0.560736	0.893888	0.906729	0.786678	0.73081	0.745385	0.775793	0.993914	0.850106	0.611884	0.90532	0.905797	0.900768	0.866876	0.843951	0.968755	0.987051	0.864837
rs313511837	TAF3	419107	1	4238786	reference,synonymous-codon	ss537744104	AX-75452652	A/C	0.886115	0.568779	0.0700597	0.822651	0.280035	0.425755	0.673749	0.871892	0.853981	0.978146	0.211379	0.909572	0.241093	0.310073	0.899169	0.0796336	0.285652	0.174396	0.0791698	0.879041	0.442211	0.985073	0.178891	0.585358	0.357786	0.466976	0.327138	0.19774	0.181421	0.15555	0.0647556	0.168122	0.192553	0.0887021	0.129021	0.101753	0.109959	0.128273	0.0987014	0.0894473	0.146362
rs314160302	TAF3	419107	1	4241211	intron-variant	ss537990942	AX-75452699	A/G	0.199644	0.893488	0.354076	0.321094	0.644104	0.272547	0.807967	0.892627	0.923305	0.7163	0.383473	0.792119	0.136591	0.614277	0.156727	0.432596	0.159905	0.261887	0.427856	0.720041	0.961643	0.55351	0.979549	0.896332	0.263104	0.648666	0.29554	0.159788	0.150963	0.136601	0.105236	0.173814	0.113267	0.108816	0.152369	0.119053	0.120498	0.133347	0.141454	0.144343	0.162885
rs13621860	TAF3	419107	1	4242616	intron-variant	ss538082065	AX-75452724	C/T	0.282725	0.476131	0.809649	0.782968	0.280549	0.964864	0.647943	0.295952	0.683928	0.756337	0.712172	0.433793	0.396408	0.837204	0.381566	0.496701	0.808559	0.122158	0.49668	0.795382	0.344986	0.928563	0.112989	0.52952	0.870424	0.930537	0.350909	0.296291	0.283794	0.236541	0.215105	0.22561	0.307277	0.189804	0.247177	0.202678	0.240441	0.218361	0.204829	0.20146	0.268062
rs317504459	TAF3	419107	1	4246882	intron-variant	ss537938698	AX-75452819	A/G	0.252982	0.53917	0.365019	0.651242	0.592973	0.0757984	0.693129	0.801257	0.970472	0.563981	0.752379	0.520596	0.771268	0.794626	0.116443	0.278447	0.766367	0.00954164	0.280934	0.740017	0.468152	0.423914	0.325552	0.372503	0.684122	0.993582	0.916809	0.867252	0.886624	0.940801	0.817108	0.949499	0.815783	0.867312	0.882943	0.892625	0.98349	0.987126	0.894672	0.848038	0.990559
rs317458978	TAF3	419107	1	4246991	intron-variant	ss537833148	AX-80857647	A/T	0.109832	0.368934	0.538601	0.990948	0.775555	0.378447	0.527546	0.546025	0.210306	0.608514	0.496189	0.520923	0.288141	0.766672	0.829737	0.175351	0.485435	0.374212	0.17614	0.722458	0.423114	0.181958	0.907243	0.895363	0.813804	0.789745	0.182447	0.165657	0.167857	0.127663	0.231015	0.211509	0.170807	0.263947	0.434089	0.383744	0.353606	0.36013	0.44149	0.459018	0.467324
rs317593098	TAF3	419107	1	4249395	intron-variant	ss537853386	AX-75452871	C/T	0.252982	0.53917	0.365019	0.651242	0.592973	0.0757984	0.660261	0.801257	0.970472	0.563981	0.771979	0.520596	0.771268	0.794626	0.116443	0.278447	0.766367	0.00954164	0.280934	0.740017	0.468152	0.423914	0.325552	0.372503	0.767902	0.993582	0.8466	0.797081	0.816006	0.870815	0.885526	0.982532	0.753319	0.927201	0.937098	0.947831	0.963247	0.936091	0.94688	0.902536	0.952032
rs313552550	TAF3	419107	1	4249987	intron-variant	ss537952751	AX-75452884	C/T	0.544697	0.766021	0.667316	0.456799	0.331948	0.224147	0.210445	0.312217	0.103996	0.17118	0.479944	0.101464	0.243853	0.93109	0.0202911	0.729962	0.181313	0.0294657	0.727354	0.784818	0.762595	0.347482	0.322991	0.198246	0.593266	0.609679	0.165389	0.164809	0.158159	0.0917157	0.106878	0.13653	0.1925	0.151015	0.307337	0.259974	0.293098	0.317904	0.336771	0.329176	0.434494
rs80703080	TAF3	419107	1	4251436	intron-variant	ss537893607	AX-75452916	A/G	0.252982	0.53917	0.365019	0.651242	0.592973	0.0757984	0.69551	0.801257	0.970472	0.563981	0.680065	0.520596	0.771268	0.794626	0.116443	0.278447	0.766367	0.00954164	0.280934	0.740017	0.468152	0.423914	0.325552	0.372503	0.7536	0.993582	0.84371	0.793017	0.809625	0.857942	0.89427	0.968883	0.731493	0.961525	0.97842	0.990257	0.912676	0.889954	0.986694	0.943514	0.913133
rs314195390	TAF3	419107	1	4256665	intron-variant	ss538031732	AX-75453032	C/T	0.189866	0.457406	0.548598	0.896156	0.937873	0.0771637	0.966697	0.643532	0.528831	0.474192	0.911776	0.424683	0.986564	0.652299	0.187649	0.259344	0.916507	0.0182157	0.261713	0.660663	0.756027	0.516094	0.611905	0.433216	0.78274	0.765865	0.79194	0.752851	0.772873	0.817422	0.853791	0.99868	0.79415	0.917351	0.896055	0.886039	0.94214	0.900868	0.979742	0.918924	0.95459
rs318082052	TAF3	419107	1	4261869	intron-variant	ss537901747	AX-75453141	C/T	0.617152	0.595943	0.299826	0.72407	0.78194	0.817243	0.414742	0.651338	0.483378	0.516958	0.352711	0.354611	0.740718	0.68621	0.07651	0.84758	0.176267	0.0463642	0.85071	0.763192	0.414708	0.728815	0.831707	0.471435	0.700735	0.914168	0.469353	0.34385	0.339895	0.303386	0.141258	0.240332	0.213395	0.265868	0.400852	0.337142	0.569103	0.635778	0.632001	0.619457	0.66208
rs318007140	TAF3	419107	1	4264107	intron-variant	ss538088582	AX-75453193	A/G	0.69811	0.791138	0.338323	0.657248	0.697507	0.511952	0.878752	0.787417	0.757056	0.237375	0.227704	0.150266	0.122898	0.505133	0.116217	0.898149	0.347278	0.205133	0.898015	0.44182	0.849638	0.166926	0.689702	0.243672	0.764586	0.170025	0.273897	0.227807	0.224219	0.180548	0.294755	0.376557	0.325065	0.309096	0.443209	0.428147	0.253791	0.273978	0.304157	0.310556	0.358179
rs13827307	TAF3	419107	1	4264390	intron-variant	ss538253513	AX-75453197	A/G	0.650445	0.632294	0.424259	0.521044	0.990852	0.355185	0.818486	0.167597	0.880948	0.37119	0.0799881	0.351877	0.407951	0.596403	0.0102515	0.314738	0.0208473	0.0206103	0.31078	0.913315	0.616495	0.711102	0.716514	0.607397	0.0263169	0.230306	0.452356	0.623247	0.64227	0.744784	0.899385	0.699164	0.869816	0.729582	0.748505	0.838017	0.737487	0.617307	0.589809	0.557596	0.606333
rs316098070	GATA3	419106	1	4296009	upstream-variant-2KB	ss537927524	AX-80860926	C/G	0.849867	0.839498	0.944287	0.296414	0.821866	0.17102	0.301188	0.479554	0.0110083	0.0441294	0.19456	0.0408897	0.478436	0.642574	0.0377452	0.581715	0.201059	0.0739482	0.579291	0.784511	0.331945	0.267688	0.454091	0.36792	0.619811	0.778667	0.203347	0.252798	0.239586	0.119897	0.113655	0.147516	0.176921	0.139266	0.290102	0.303864	0.425252	0.472105	0.520019	0.538845	0.593527
rs14791410	GATA3	419106	1	4300569	intron-variant	ss538093144	AX-75453937	A/G	0.32785	0.765875	0.680817	0.945404	0.996223	0.729125	0.282608	0.265219	0.127387	0.521392	0.677824	0.568422	0.294668	0.971794	0.544566	0.637918	0.326519	0.553091	0.634153	0.735403	0.61267	0.152461	0.978499	0.832512	0.122315	0.194057	0.325196	0.28601	0.263012	0.087342	0.0608367	0.119142	0.0873179	0.0888975	0.149876	0.143136	0.257699	0.350417	0.405106	0.457311	0.4585
rs13827296	GATA3	419106	1	4301384	intron-variant	ss537986073	AX-75453957	A/G	0.849867	0.839498	0.944287	0.296414	0.821866	0.17102	0.31945	0.479554	0.0110083	0.0441294	0.216739	0.0408897	0.478436	0.642574	0.0377452	0.581715	0.201059	0.0739482	0.579291	0.784511	0.331945	0.267688	0.454091	0.36792	0.555755	0.778667	0.198412	0.247879	0.235499	0.117579	0.111496	0.144907	0.17266	0.134755	0.281539	0.2944	0.413052	0.454658	0.500288	0.519547	0.572415
rs80745460	GATA3	419106	1	4303052	intron-variant	ss538143881	AX-75453999	A/G	0.126565	0.206923	0.103278	0.859971	0.625683	0.0741754	0.143271	0.866127	0.297438	0.805511	0.674244	0.668905	0.568029	0.16868	0.423589	0.278235	0.98197	0.127227	0.279555	0.489065	0.512246	0.511047	0.494009	0.225194	0.501098	0.308242	0.368181	0.4167	0.432075	0.369479	0.461213	0.338916	0.400301	0.494177	0.594824	0.576246	0.781924	0.7401	0.841301	0.883613	0.82977
rs15191462	GATA3	419106	1	4304643	intron-variant	ss537743186	AX-75454040	A/G	0.401236	0.947569	0.818412	0.163279	0.951193	0.0642962	0.711517	0.303018	0.217446	0.0313966	0.0171044	0.0154673	0.789137	0.96679	0.00858019	0.48807	0.0375663	0.0220906	0.483068	0.434885	0.627285	0.774589	0.468959	0.146642	0.478505	0.688893	0.949602	0.851243	0.863002	0.98179	0.868751	0.918584	0.814377	0.933767	0.824657	0.766729	0.79485	0.800302	0.780913	0.777212	0.783071
rs317606390	GATA3	419106	1	4306413	intron-variant	ss537859962	AX-80878330	C/G	0.518043	0.921014	0.188181	0.937592	0.142671	0.0571985	0.870438	0.189071	0.925241	0.639161	0.862472	0.650602	0.682562	0.389849	0.0594757	0.728424	0.48637	0.0163402	0.732649	0.550353	0.43236	0.406786	0.53065	0.352926	0.276328	0.584183	0.704722	0.791712	0.795149	0.606662	0.648769	0.632184	0.557088	0.645205	0.646196	0.608238	0.682179	0.780156	0.88763	0.93735	0.816173
rs315335096	GATA3	419106	1	4312837	intron-variant	ss538205684	AX-75454216	C/T	0.105661	0.0757868	0.566119	0.457175	0.218278	0.383308	0.10764	0.621647	0.915857	0.564341	0.369412	0.34641	0.822205	0.645013	0.700486	0.930456	0.999697	0.496974	0.93255	0.419931	0.746758	0.751083	0.706907	0.346617	0.0994993	0.296313	0.859212	0.8968	0.874844	0.610216	0.520542	0.615406	0.507418	0.521973	0.467769	0.553974	0.568049	0.667332	0.691103	0.722661	0.650708
rs13826591	MIR1626	100316021	1	5556762	upstream-variant-2KB	ss537938638	AX-75480224	C/T	0.209349	0.202109	0.656331	0.970813	0.721233	0.575683	0.0957191	0.188666	0.824434	0.653876	0.553672	0.834446	0.937536	0.881266	0.996224	0.218503	0.308659	0.773531	0.219858	0.178282	0.26018	0.0414557	0.367515	0.905488	0.419466	0.0224553	0.738262	0.648763	0.65684	0.95001	0.881914	0.828355	0.931558	0.836601	0.998763	0.882368	0.495809	0.524726	0.549554	0.544112	0.736567
rs316387783	MIR1626	100316021	1	5557777	upstream-variant-2KB	ss538214411	AX-75480245	A/G	0.94812	0.789387	0.65625	0.96497	0.42042	0.752207	0.429053	0.253711	0.781244	0.83076	0.539083	0.756001	0.749978	0.668594	0.36915	0.398248	0.265826	0.752893	0.401221	0.253062	0.585825	0.518368	0.998405	0.388204	0.681809	0.589265	0.629223	0.640853	0.642633	0.4672	0.351733	0.369152	0.476243	0.526594	0.58315	0.489989	0.91919	0.986186	0.991314	0.999933	0.859395
rs80769446	MIR1596	100316008	1	5677913	upstream-variant-2KB	ss538160687	AX-75482800	A/C	0.505317	0.575529	0.79508	0.207217	0.288499	0.799077	0.359218	0.108375	0.305625	0.751777	0.108143	0.436542	0.902829	0.97558	0.789706	0.464191	0.754901	0.38639	0.465689	0.279485	0.877909	0.399463	0.69438	0.509101	0.578989	0.212915	0.0688533	0.106897	0.126661	0.090148	0.110635	0.143414	0.182302	0.197403	0.236184	0.149382	0.215227	0.211425	0.179137	0.162225	0.0774567
rs316063218	CELF2	374111	1	5716179	intron-variant	ss537721294	AX-75483651	C/T	0.984181	0.741723	0.81474	0.904921	0.261142	0.233828	0.642008	0.153536	0.878248	0.27129	0.531859	0.399616	0.0908835	0.233788	0.435059	0.264601	0.610717	0.218248	0.264636	0.916083	0.14995	0.847867	0.133654	0.910797	0.978041	0.461455	0.437369	0.308186	0.305423	0.216185	0.128385	0.210699	0.171118	0.114044	0.204349	0.127066	0.394912	0.362951	0.389494	0.40555	0.417829
rs312833311	CELF2	374111	1	5716530	intron-variant	ss537924066	AX-80757182	C/G	0.579839	0.204336	0.450619	0.411305	0.843056	0.120342	0.210438	0.388484	0.217333	0.329681	0.565314	0.29648	0.441133	0.635257	0.28993	0.336149	0.215266	0.0647101	0.336148	0.568074	0.677036	0.560228	0.709362	0.726707	0.924628	0.157097	0.526256	0.62302	0.640511	0.823381	0.768796	0.915434	0.785103	0.650023	0.692417	0.817395	0.648975	0.754818	0.708427	0.704937	0.594098
rs313244010	CELF2	374111	1	5720676	intron-variant	ss538239653	AX-80966456	C/G	0.489396	0.4751	0.669083	0.554538	0.133844	0.950647	0.15984	0.0968749	0.709978	0.547752	0.55759	0.75813	0.291707	0.519322	0.701618	0.968677	0.358063	0.625826	0.964701	0.72438	0.409299	0.445868	0.96611	0.908161	0.351097	0.0493881	0.344695	0.371756	0.381961	0.18531	0.100914	0.177919	0.180377	0.170583	0.211231	0.196805	0.536919	0.477845	0.458213	0.465309	0.359366
rs14738234	CELF2	374111	1	5720794	intron-variant	ss537783717	AX-75483766	A/G	0.475386	0.424425	0.571092	0.901099	0.766282	0.719514	0.0169142	0.405328	0.854684	0.745684	0.31373	0.903528	0.776893	0.878768	0.399911	0.213448	0.631822	0.220005	0.214855	0.134746	0.334925	0.174304	0.103261	0.79895	0.332805	0.0922272	0.838874	0.668237	0.654394	0.912928	0.934384	0.992752	0.855285	0.646319	0.94537	0.744591	0.604395	0.690576	0.762886	0.7422	0.994995
rs314846988	CELF2	374111	1	5725023	intron-variant	ss537943861	AX-75483852	C/T	0.363943	0.30564	0.330765	0.542788	0.574001	0.962034	0.0571044	0.395963	0.837323	0.922198	0.491601	0.747706	0.893052	0.659542	0.449111	0.483403	0.82322	0.28292	0.485307	0.218102	0.0623906	0.134306	0.329484	0.858101	0.333073	0.432437	0.967165	0.846633	0.832741	0.783985	0.876951	0.872143	0.935275	0.897305	0.867903	0.973649	0.923322	0.99194	0.908214	0.937251	0.626577
rs14698988	CELF2	374111	1	5725196	intron-variant	ss538104203	AX-75483856	A/G	0.287268	0.394874	0.850062	0.196571	0.321761	0.358135	0.0595716	0.460071	0.566743	0.590579	0.734441	0.386217	0.873749	0.997831	0.769856	0.506651	0.638725	0.549611	0.510274	0.621429	0.42939	0.167967	0.348457	0.906914	0.267201	0.342403	0.55826	0.718556	0.744473	0.41629	0.459391	0.554143	0.594543	0.667073	0.61279	0.683896	0.741579	0.69243	0.617529	0.614691	0.394974
rs317395710	CELF2	374111	1	5731571	intron-variant	ss538103922	AX-75484004	C/T	0.467435	0.720846	0.383594	0.932929	0.550887	0.396984	0.569187	0.0590532	0.878255	0.250226	0.55094	0.243086	0.131458	0.390062	0.249826	0.663032	0.264845	0.158754	0.660387	0.555851	0.998049	0.485477	0.189874	0.773516	0.680828	0.0361381	0.211408	0.128108	0.121607	0.0903603	0.0324046	0.0576897	0.0511088	0.0351953	0.0781316	0.0512314	0.300871	0.280066	0.337431	0.356333	0.475561
rs314547855	CELF2	374111	1	5732352	intron-variant	ss538053924	AX-75484019	A/G	0.799558	0.451918	0.155272	0.870584	0.949314	0.894833	0.170393	0.309475	0.348755	0.926957	0.885649	0.98115	0.871021	0.378165	0.329885	0.184184	0.696319	0.0956449	0.183178	0.169034	0.456011	0.76667	0.883262	0.701313	0.933211	0.142334	0.433142	0.4645	0.475511	0.624762	0.886188	0.879259	0.98373	0.771227	0.991555	0.867996	0.563191	0.52505	0.507751	0.529478	0.43511
rs315343824	CELF2	374111	1	5737393	intron-variant	ss537794596	AX-75484129	A/G	0.515757	0.922861	0.790122	0.89563	0.276071	0.961838	0.573082	0.163684	0.388303	0.899995	0.390914	0.678553	0.523316	0.302864	0.880294	0.604654	0.773566	0.862185	0.601746	0.349848	0.932475	0.418455	0.961544	0.387836	0.866568	0.00802359	0.268688	0.329945	0.34744	0.450509	0.656006	0.602793	0.655258	0.720315	0.599428	0.529942	0.448547	0.363345	0.341624	0.330544	0.282266
rs316268765	CELF2	374111	1	5739961	intron-variant	ss538009399	AX-75484185	C/T	0.593507	0.204005	0.492808	0.397128	0.837472	0.11262	0.215978	0.362117	0.209596	0.331581	0.553108	0.304443	0.43009	0.641475	0.306936	0.318864	0.233073	0.0672931	0.318863	0.587917	0.664197	0.537162	0.663041	0.7622	0.909863	0.153676	0.522469	0.618999	0.636233	0.819376	0.772474	0.918912	0.788462	0.6529	0.69522	0.820218	0.646265	0.752044	0.7057	0.702132	0.591632
rs318186885	CELF2	374111	1	5741128	intron-variant	ss538004479	AX-75484208	A/G	0.363943	0.30564	0.330765	0.542788	0.574001	0.962034	0.0571044	0.395963	0.837323	0.922198	0.491601	0.747706	0.893052	0.659542	0.449111	0.483403	0.82322	0.28292	0.485307	0.218102	0.0623906	0.134306	0.329484	0.858101	0.333073	0.432437	0.967165	0.846633	0.832741	0.783985	0.876951	0.872143	0.935275	0.897305	0.867903	0.973649	0.923322	0.99194	0.908214	0.937251	0.626577
rs14790867	CELF2	374111	1	5744654	intron-variant	ss538029086	AX-75484282	A/G	0.852505	0.855747	0.35697	0.395435	0.795571	0.397616	0.551374	0.313485	0.829259	0.472356	0.733835	0.36442	0.58224	0.185236	0.600687	0.59294	0.9474	0.542411	0.588364	0.141781	0.207924	0.551098	0.915264	0.456002	0.584047	0.0800714	0.843968	0.845154	0.853773	0.970537	0.707216	0.892001	0.829009	0.722816	0.979821	0.978979	0.865045	0.742945	0.722834	0.736829	0.663201
rs316780307	CELF2	374111	1	5745688	intron-variant	ss537931885	AX-75484306	G/T	0.384707	0.326399	0.991321	0.427467	0.637623	0.505348	0.0204637	0.595619	0.976965	0.76277	0.666973	0.408239	0.684442	0.544709	0.727401	0.955279	0.973112	0.679639	0.950949	0.845252	0.39826	0.412043	0.35002	0.501927	0.407681	0.214325	0.672042	0.564985	0.55701	0.928345	0.904817	0.95994	0.958301	0.935694	0.941334	0.806899	0.70517	0.675319	0.744806	0.745541	0.963793
rs315355123	CELF2	374111	1	5748336	intron-variant	ss538158571	AX-75484370	G/T	0.349112	0.514077	0.169835	0.382308	0.334047	0.877192	0.825511	0.716564	0.755922	0.91735	0.755207	0.505168	0.475836	0.533206	0.982776	0.283533	0.69458	0.745959	0.283566	0.64466	0.0121259	0.420485	0.406759	0.323433	0.998934	0.227057	0.789526	0.830819	0.823972	0.909828	0.880324	0.795986	0.897582	0.943737	0.909714	0.958302	0.916438	0.901681	0.87296	0.889136	0.706046
rs13826521	CELF2	374111	1	5749887	intron-variant	ss537740854	AX-75484402	C/T	0.873944	0.730964	0.717806	0.495579	0.601821	0.753841	0.726262	0.351629	0.763037	0.766016	0.656649	0.404869	0.906186	0.629764	0.972468	0.443784	0.676132	0.963811	0.441781	0.467482	0.25194	0.829591	0.707686	0.266181	0.80412	0.00616084	0.366413	0.439201	0.449936	0.685156	0.746078	0.647702	0.743897	0.818611	0.6942	0.710605	0.661085	0.587184	0.58116	0.557501	0.599349
rs313514689	CELF2	374111	1	5753286	intron-variant	ss537995632	AX-75484466	A/G	0.475386	0.424425	0.571092	0.901099	0.766282	0.719514	0.0161002	0.405328	0.854684	0.745684	0.300563	0.903528	0.776893	0.878768	0.399911	0.213448	0.631822	0.220005	0.214855	0.134746	0.334925	0.174304	0.103261	0.79895	0.333797	0.0922272	0.975205	0.857055	0.848044	0.872818	0.846645	0.779	0.917906	0.857756	0.832972	0.952345	0.802279	0.888756	0.96415	0.943168	0.802096
rs315365640	CELF2	374111	1	5756070	intron-variant	ss538274231	AX-75484531	A/G	0.932573	0.711316	0.570977	0.179057	0.717826	0.779527	0.191874	0.22127	0.992763	0.809248	0.455842	0.447808	0.762375	0.99294	0.624499	0.636427	0.289506	0.955258	0.639864	0.989068	0.936937	0.480293	0.996055	0.477009	0.598268	0.500447	0.425625	0.451221	0.472689	0.184133	0.107771	0.190095	0.193734	0.177546	0.269837	0.225657	0.66659	0.675691	0.67367	0.672305	0.528802
rs312784094	CELF2	374111	1	5759669	intron-variant	ss537864859	AX-75484606	C/T	0.768036	0.157919	0.568923	0.57455	0.970762	0.904276	0.0582111	0.194606	0.583489	0.70882	0.0538196	0.591904	0.820926	0.678547	0.614543	0.376545	0.546234	0.683077	0.374614	0.506845	0.344872	0.63524	0.35085	0.732192	0.323516	0.407491	0.0438953	0.0428186	0.0504272	0.0877138	0.120137	0.12671	0.168969	0.164295	0.283729	0.123327	0.195289	0.214001	0.224541	0.210712	0.187136
rs313736032	CELF2	374111	1	5762539	intron-variant	ss538198739	AX-75484675	A/G	0.855317	0.739189	0.962878	0.472729	0.928603	0.782711	0.306533	0.482856	0.77335	0.603164	0.614088	0.912911	0.886005	0.960692	0.810806	0.422873	0.670903	0.450372	0.428371	0.759596	0.715872	0.79118	0.676389	0.71197	0.268974	0.743588	0.664013	0.622432	0.603762	0.351835	0.209496	0.240466	0.302147	0.376672	0.408795	0.435445	0.867603	0.913938	0.921697	0.965066	0.870805
rs312407540	CELF2	374111	1	5767901	intron-variant	ss538087661	AX-75484793	C/T	0.579839	0.204336	0.450619	0.411305	0.843056	0.120342	0.14821	0.388484	0.217333	0.329681	0.645462	0.29648	0.441133	0.635257	0.28993	0.336149	0.215266	0.0647101	0.336148	0.568074	0.677036	0.560228	0.709362	0.726707	0.984105	0.157097	0.650948	0.752795	0.772733	0.961099	0.645835	0.778299	0.656168	0.529058	0.53728	0.66391	0.832501	0.944446	0.891125	0.891564	0.755042
rs13826505	CELF2	374111	1	5774212	intron-variant	ss538218507	AX-75484954	A/G	0.908479	0.612547	0.87373	0.770239	0.32333	0.708384	0.637917	0.439208	0.503965	0.770408	0.247365	0.483154	0.596459	0.623683	0.73354	0.680792	0.902917	0.776976	0.67786	0.295151	0.850663	0.62726	0.995642	0.210009	0.499706	0.0165125	0.0527296	0.0740998	0.0787443	0.113595	0.191444	0.166106	0.184209	0.206465	0.150444	0.130112	0.110487	0.0812274	0.0772335	0.076525	0.0637101
rs316239745	CELF2	374111	1	5776257	intron-variant	ss537972570	AX-75485003	G/T	0.96975	0.340406	0.771035	0.564007	0.690468	0.356228	0.047653	0.223028	0.679442	0.656872	0.670329	0.835507	0.595367	0.823705	0.840583	0.651479	0.335169	0.797984	0.655639	0.544526	0.130111	0.151467	0.493062	0.770241	0.241925	0.0643936	0.534843	0.567294	0.559732	0.212269	0.163729	0.197005	0.185734	0.225079	0.152994	0.214876	0.514319	0.415731	0.405421	0.435956	0.304123
rs315950491	CELF2	374111	1	5776942	intron-variant	ss537753700	AX-75485018	C/T	0.825682	0.813845	0.814795	0.976178	0.80044	0.947299	0.0393615	0.774259	0.741962	0.660798	0.49613	0.706016	0.727262	0.736717	0.275013	0.229939	0.753628	0.153437	0.231479	0.103642	0.496618	0.295513	0.0975726	0.489339	0.434814	0.116174	0.488529	0.641028	0.641908	0.400675	0.371709	0.317422	0.398944	0.565106	0.325272	0.486151	0.63822	0.568545	0.518184	0.537868	0.353219
rs316528667	CELF2	374111	1	5777687	intron-variant	ss537842972	AX-75485036	C/T	0.726331	0.922786	0.866989	0.338796	0.233559	0.793943	0.236576	0.517679	0.63517	0.392296	0.541807	0.191322	0.412468	0.812725	0.99509	0.0827312	0.278375	0.301412	0.0832317	0.306587	0.912687	0.530965	0.225979	0.429606	0.426164	0.736828	0.923102	0.824647	0.819643	0.796362	0.77464	0.763576	0.860125	0.998749	0.880954	0.984554	0.733101	0.705416	0.704262	0.672071	0.849464
rs317356487	CELF2	374111	1	5780096	intron-variant	ss537856966	AX-75485084	C/T	0.958628	0.132844	0.868607	0.896129	0.540309	0.124403	0.356032	0.363726	0.683181	0.620147	0.832382	0.846074	0.279832	0.428337	0.490818	0.242672	0.493732	0.202847	0.242686	0.694594	0.0614975	0.314452	0.469453	0.788811	0.715346	0.763501	0.72236	0.818563	0.81913	0.851829	0.705656	0.884299	0.721286	0.600877	0.655576	0.651626	0.991628	0.902655	0.9134	0.929845	0.894459
rs316029860	CELF2	374111	1	5789459	intron-variant	ss537763631	AX-75485286	A/G	0.977646	0.934248	0.77926	0.535759	0.574953	0.197842	0.445872	0.145299	0.980619	0.784529	0.987818	0.97712	0.518272	0.433159	0.98368	0.588217	0.336451	0.686553	0.588278	0.140095	0.209595	0.206831	0.787041	0.821728	0.892278	0.0743007	0.219984	0.251055	0.264944	0.14848	0.119683	0.157059	0.147416	0.177252	0.156767	0.122366	0.35031	0.286054	0.278356	0.298118	0.187322
rs314145547	CELF2	374111	1	5795815	intron-variant	ss537861980	AX-75485421	A/G	0.825682	0.813845	0.814795	0.976178	0.80044	0.947299	0.0277746	0.774259	0.741962	0.660798	0.514626	0.706016	0.708204	0.73242	0.275013	0.229939	0.753628	0.153437	0.231479	0.110078	0.496618	0.295513	0.0975726	0.489339	0.485607	0.116174	0.496908	0.650515	0.650369	0.407509	0.380691	0.323803	0.406048	0.574493	0.33095	0.495392	0.64705	0.572625	0.515512	0.530321	0.347275
rs15190205	CELF2	374111	1	5798461	intron-variant	ss538175130	AX-75485467	C/T	0.732265	0.633335	0.597158	0.444269	0.638257	0.122601	0.582723	0.110693	0.916123	0.653642	0.919643	0.937372	0.303938	0.171231	0.767575	0.466465	0.212166	0.871034	0.466533	0.311452	0.278468	0.25788	0.992026	0.975672	0.723873	0.102986	0.24308	0.273909	0.286062	0.158472	0.126594	0.163959	0.155161	0.184084	0.163404	0.127479	0.36444	0.304649	0.298457	0.32082	0.2069
rs314903746	CELF2	374111	1	5798517	intron-variant	ss537951324	AX-75485469	C/T	0.648111	0.897844	0.802609	0.323984	0.782162	0.373624	0.446941	0.123708	0.770071	0.988398	0.658037	0.53054	0.476654	0.318656	0.496206	0.422129	0.139968	0.954485	0.423539	0.48037	0.382483	0.593343	0.992451	0.41558	0.441289	0.489146	0.719667	0.678444	0.67296	0.344441	0.226333	0.307172	0.275993	0.320514	0.356216	0.328664	0.814588	0.803785	0.838555	0.895817	0.751628
rs13826496	CELF2	374111	1	5798645	intron-variant	ss537909298	AX-75485474	C/T	0.806216	0.173998	0.787526	0.12949	0.806646	0.326517	0.0427732	0.117673	0.245786	0.638302	0.344761	0.316156	0.199245	0.0648766	0.530674	0.601325	0.530196	0.8526	0.598988	0.667906	0.564253	0.804512	0.259701	0.389001	0.668134	0.906483	0.13826	0.133354	0.149338	0.160803	0.238818	0.317612	0.282255	0.289804	0.426345	0.178749	0.250096	0.257654	0.263695	0.278655	0.196605
rs316164805	CELF2	374111	1	5802005	intron-variant	ss537965868	AX-75485532	A/C	0.732857	0.18533	0.943501	0.9202	0.585437	0.811359	0.00699187	0.597435	0.175171	0.698081	0.180594	0.931626	0.773634	0.680094	0.772379	0.598908	0.206463	0.818907	0.602969	0.631879	0.571957	0.663459	0.315606	0.838398	0.156932	0.467095	0.516626	0.549593	0.586879	0.909911	0.54514	0.583673	0.565089	0.6237	0.523791	0.802371	0.639294	0.650676	0.619287	0.582256	0.612014
rs317453456	CELF2	374111	1	5804537	intron-variant	ss538118143	AX-75485570	A/G	0.75196	0.937929	0.766545	0.342414	0.345475	0.849409	0.362775	0.739614	0.745268	0.394812	0.741911	0.262465	0.198511	0.600831	0.955526	0.103557	0.318792	0.332338	0.104161	0.324105	0.938494	0.64278	0.23316	0.693052	0.538326	0.655401	0.90125	0.983886	0.980798	0.620633	0.598673	0.575046	0.650633	0.793321	0.707818	0.832685	0.886976	0.841078	0.82893	0.790771	0.97344
rs313036633	CELF2	374111	1	5805105	intron-variant	ss538006587	AX-75485583	A/G	0.56344	0.637603	0.621869	0.579492	0.297079	0.663351	0.125848	0.319817	0.338198	0.702542	0.538646	0.438964	0.544492	0.790982	0.644942	0.22363	0.114461	0.867532	0.224642	0.337088	0.936404	0.394083	0.332216	0.55783	0.469705	0.327285	0.779439	0.755555	0.766712	0.799067	0.59791	0.63426	0.648871	0.708817	0.645257	0.810065	0.680479	0.687661	0.654096	0.622179	0.722944
rs15190178	CELF2	374111	1	5809382	intron-variant	ss538008386	AX-75485668	A/G	0.341753	0.803688	0.642805	0.3858	0.242857	0.646355	0.182499	0.205786	0.181284	0.864494	0.710359	0.548426	0.430546	0.703622	0.693051	0.533442	0.209699	0.945906	0.53296	0.526465	0.68445	0.49192	0.318373	0.42077	0.554397	0.311946	0.841011	0.813589	0.8266	0.729954	0.530199	0.575842	0.575853	0.636728	0.586564	0.722616	0.740363	0.755968	0.720297	0.68508	0.802898
rs313882453	CELF2	374111	1	5810142	intron-variant	ss537943418	AX-80948697	C/G	0.878482	0.549212	0.752362	0.474025	0.646406	0.753429	0.301246	0.400782	0.984876	0.617777	0.968533	0.483608	0.494505	0.892186	0.556996	0.0713794	0.424698	0.130023	0.071412	0.0568689	0.96378	0.176045	0.169857	0.951847	0.947632	0.107336	0.332976	0.485181	0.514617	0.358408	0.448729	0.392144	0.499611	0.644113	0.452725	0.507276	0.634395	0.588873	0.548536	0.551709	0.343071
rs316280292	CELF2	374111	1	5811977	intron-variant	ss538135321	AX-75485721	A/G	0.754846	0.502879	0.856939	0.655164	0.250404	0.4138	0.910567	0.86168	0.459619	0.549903	0.579097	0.316813	0.543986	0.560775	0.431377	0.891258	0.595286	0.61275	0.894314	0.548354	0.821825	0.364315	0.968073	0.220767	0.330498	0.104814	0.181194	0.262488	0.292038	0.468012	0.639174	0.586801	0.645381	0.655823	0.509294	0.440949	0.301317	0.22607	0.188482	0.16881	0.130762
rs317805123	CELF2	374111	1	5816354	intron-variant	ss538020393	AX-75485814	G/T	0.825682	0.813845	0.814795	0.976178	0.80044	0.947299	0.0259003	0.774259	0.741962	0.660798	0.496628	0.706016	0.727262	0.736717	0.275013	0.229939	0.753628	0.153437	0.231479	0.103642	0.496618	0.295513	0.0975726	0.489339	0.484767	0.116174	0.511485	0.666921	0.667217	0.420751	0.392431	0.33382	0.418392	0.58761	0.340202	0.507468	0.663597	0.587678	0.529577	0.54454	0.356314
rs14790844	CELF2	374111	1	5816960	intron-variant	ss537946741	AX-80958385	A/T	0.754846	0.502879	0.856939	0.655164	0.250404	0.4138	0.933253	0.86168	0.459619	0.549903	0.531415	0.316813	0.543986	0.560775	0.431377	0.891258	0.595286	0.61275	0.894314	0.548354	0.821825	0.364315	0.968073	0.220767	0.333755	0.104814	0.148676	0.222254	0.251477	0.416067	0.578889	0.535268	0.598553	0.615567	0.475314	0.405937	0.273706	0.201902	0.166827	0.148887	0.114675
rs13826489	CELF2	374111	1	5822183	intron-variant	ss538167323	AX-75485933	A/C	0.810009	0.345485	0.623275	0.580762	0.357907	0.915565	0.103956	0.452223	0.824187	0.663472	0.730906	0.964003	0.327865	0.528259	0.451122	0.806463	0.28894	0.386572	0.802552	0.92758	0.534899	0.932884	0.991299	0.681639	0.133106	0.826724	0.892161	0.859355	0.833251	0.451014	0.194007	0.322709	0.229695	0.258358	0.334548	0.365585	0.848261	0.859812	0.879066	0.917001	0.833665
rs315753690	CELF2	374111	1	5823547	intron-variant	ss538142141	AX-75485956	C/T	0.726252	0.686699	0.357707	0.735253	0.0723956	0.468016	0.876191	0.423146	0.583126	0.532369	0.55224	0.673176	0.0545935	0.131431	0.243526	0.168072	0.560997	0.0726008	0.168136	0.320904	0.71769	0.961811	0.206209	0.943355	0.686364	0.78737	0.53043	0.492659	0.5027	0.42829	0.206934	0.418997	0.248327	0.20633	0.388916	0.259729	0.551748	0.520299	0.521988	0.510101	0.519009
rs316191022	CELF2	374111	1	5823704	intron-variant	ss537987571	AX-75485960	A/G	0.927444	0.42575	0.504381	0.556436	0.444108	0.949775	0.831318	0.569627	0.990897	0.889498	0.857553	0.757095	0.208768	0.374397	0.126087	0.277557	0.394192	0.0601247	0.276486	0.208335	0.874062	0.516994	0.256867	0.372536	0.372666	0.391716	0.855394	0.944405	0.972102	0.72911	0.384637	0.640301	0.422022	0.358578	0.636822	0.523361	0.977959	0.908424	0.84551	0.819968	0.807833
rs13826486	CELF2	374111	1	5824847	reference,synonymous-codon	ss537734811	AX-75485993	C/T	0.754846	0.502879	0.856939	0.655164	0.250404	0.4138	0.879495	0.86168	0.459619	0.549903	0.565633	0.316813	0.543986	0.560775	0.431377	0.891258	0.595286	0.61275	0.894314	0.548354	0.821825	0.364315	0.968073	0.220767	0.315464	0.104814	0.175922	0.255905	0.285669	0.460222	0.631326	0.580184	0.64218	0.655208	0.509305	0.441011	0.30085	0.225443	0.187299	0.167101	0.129317
rs316847031	CELF2	374111	1	5826121	intron-variant	ss537829770	AX-75486024	A/G	0.964279	0.816789	0.377644	0.253833	0.750698	0.749008	0.336472	0.219067	0.998944	0.775904	0.974335	0.385569	0.534196	0.47347	0.361269	0.613386	0.142142	0.646153	0.615074	0.663786	0.853591	0.591552	0.9485	0.438775	0.421309	0.600181	0.630427	0.653231	0.654515	0.338186	0.18281	0.298543	0.22674	0.255927	0.344188	0.31784	0.769226	0.796968	0.823431	0.853778	0.718034
rs314139148	CELF2	374111	1	5828589	intron-variant	ss537891211	AX-75486079	A/G	0.778009	0.497957	0.867674	0.659945	0.270243	0.418779	0.92847	0.813777	0.464925	0.519237	0.572309	0.309133	0.542979	0.560279	0.413296	0.919071	0.59352	0.580264	0.922143	0.543776	0.780941	0.366637	0.994209	0.252213	0.323008	0.115708	0.169667	0.247662	0.276613	0.447173	0.614571	0.564884	0.626726	0.639839	0.495893	0.428969	0.291535	0.217325	0.180123	0.16066	0.123672
rs313937645	CELF2	374111	1	5835046	intron-variant	ss537826259	AX-75486201	A/G	0.568171	0.182227	0.800629	0.909655	0.380435	0.871734	0.430958	0.723993	0.170318	0.928898	0.332536	0.837319	0.987435	0.837113	0.187315	0.683518	0.237339	0.125958	0.681166	0.425119	0.918663	0.660477	0.795651	0.393525	0.321289	0.558681	0.155753	0.242507	0.271287	0.499283	0.873704	0.7344	0.934993	0.950931	0.801005	0.665478	0.286223	0.262488	0.213165	0.194845	0.132459
rs80614059	CELF2	374111	1	5836895	intron-variant	ss537799772	AX-75486231	C/T	0.883339	0.85506	0.325093	0.390549	0.309649	0.414025	0.336564	0.182932	0.655326	0.933052	0.606517	0.804186	0.323717	0.272918	0.670917	0.675373	0.257273	0.883868	0.67538	0.423827	0.747258	0.277357	0.930106	0.993358	0.808368	0.132039	0.160731	0.218382	0.236947	0.135813	0.0871617	0.146071	0.117256	0.13924	0.155118	0.121802	0.320207	0.281304	0.265038	0.263454	0.163305
rs312836320	CELF2	374111	1	5837418	intron-variant	ss537794437	AX-75486244	C/T	0.825682	0.813845	0.814795	0.976178	0.80044	0.947299	0.0259003	0.774259	0.741962	0.660798	0.496628	0.706016	0.727262	0.736717	0.275013	0.229939	0.753628	0.153437	0.231479	0.103642	0.496618	0.295513	0.0975726	0.489339	0.484767	0.116174	0.511485	0.666921	0.667217	0.420751	0.392431	0.33382	0.418392	0.58761	0.340202	0.507468	0.663597	0.587678	0.529577	0.54454	0.356314
rs14790840	CELF2	374111	1	5838172	intron-variant	ss538011854	AX-75486259	C/T	0.775055	0.491872	0.839428	0.670089	0.267242	0.410039	0.908688	0.894455	0.479314	0.545892	0.560276	0.303253	0.562073	0.583535	0.406304	0.896777	0.577386	0.580782	0.899835	0.589469	0.825632	0.345486	0.935438	0.196087	0.317577	0.102014	0.184683	0.267245	0.297589	0.475849	0.649111	0.597326	0.659932	0.672501	0.52543	0.456109	0.312051	0.234862	0.195507	0.174663	0.135137
rs317519558	CELF2	374111	1	5839229	intron-variant	ss538272546	AX-75486287	G/T	0.964279	0.816789	0.377644	0.253833	0.750698	0.749008	0.375143	0.219067	0.998944	0.775904	0.800914	0.385569	0.534196	0.47347	0.361269	0.613386	0.142142	0.646153	0.615074	0.663786	0.853591	0.591552	0.9485	0.438775	0.385153	0.600181	0.50295	0.523716	0.521869	0.245991	0.123652	0.212905	0.154965	0.171415	0.233257	0.211891	0.593457	0.632011	0.669929	0.704039	0.581955
rs313151582	USP6NL	419104	1	5900699	utr-variant-3-prime	ss537867085	AX-75487534	C/T	0.897481	0.920893	0.698699	0.315644	0.920547	0.380178	0.545733	0.106143	0.993712	0.803878	0.919703	0.4007	0.120371	0.0632763	0.216197	0.523887	0.458401	0.221494	0.525548	0.781244	0.416782	0.565081	0.406632	0.218594	0.984553	0.893601	0.515259	0.648191	0.663548	0.727906	0.984916	0.801335	0.98767	0.943717	0.801256	0.892333	0.640438	0.572431	0.497234	0.455604	0.454727
rs314151907	USP6NL	419104	1	5901792	utr-variant-3-prime	ss537979722	AX-75487554	A/G	0.687547	0.485884	0.855523	0.924851	0.495223	0.541272	0.281828	0.861858	0.34474	0.638406	0.0748512	0.87308	0.916972	0.987072	0.753148	0.522944	0.501083	0.614622	0.523066	0.803384	0.671545	0.339265	0.459504	0.874121	0.639022	0.921797	0.274762	0.26568	0.278482	0.592834	0.846847	0.776809	0.868453	0.785171	0.896693	0.695424	0.317286	0.293052	0.257691	0.221988	0.260955
rs315181983	USP6NL	419104	1	5905000	intron-variant	ss538102269	AX-75487607	C/T	0.911352	0.750562	0.691529	0.592413	0.510082	0.584083	0.452409	0.619999	0.927061	0.195765	0.276581	0.315814	0.750383	0.584501	0.534615	0.508934	0.7617	0.298728	0.510754	0.509604	0.0677753	0.869984	0.876342	0.780801	0.275218	0.671997	0.169308	0.186957	0.182439	0.106365	0.098084	0.111809	0.106606	0.158421	0.119195	0.0955926	0.179396	0.164739	0.15679	0.184076	0.109752
rs80707102	USP6NL	419104	1	5907579	intron-variant	ss538271581	AX-75487661	C/T	0.747638	0.640197	0.725587	0.465021	0.808056	0.985692	0.637476	0.397966	0.533403	0.978446	0.710039	0.512604	0.0930976	0.0699972	0.45766	0.319303	0.880727	0.38767	0.319352	0.867367	0.172477	0.763982	0.279582	0.138885	0.577413	0.116292	0.424161	0.575813	0.603224	0.731178	0.92	0.7482	0.873218	0.921112	0.688646	0.879136	0.678338	0.581552	0.545581	0.499692	0.500563
rs315342981	USP6NL	419104	1	5910640	intron-variant	ss538068341	AX-75487721	C/T	0.486656	0.855792	0.987234	0.358094	0.790367	0.32252	0.857511	0.396672	0.801607	0.502654	0.0995218	0.876529	0.297299	0.417436	0.969317	0.599893	0.402193	0.743937	0.601644	0.894593	0.250343	0.502324	0.895455	0.658933	0.397989	0.817282	0.867778	0.953866	0.994056	0.537396	0.351589	0.478707	0.341557	0.404849	0.420816	0.401758	0.969597	0.966294	0.862063	0.747351	0.840516
rs316864471	USP6NL	419104	1	5911124	intron-variant	ss537773566	AX-75487732	C/T	0.613896	0.4335	0.764892	0.68296	0.84169	0.411129	0.384625	0.745546	0.656764	0.159589	0.031974	0.313904	0.143701	0.39543	0.924116	0.885855	0.61914	0.940963	0.881904	0.614738	0.100118	0.74826	0.611746	0.959298	0.221228	0.980313	0.566381	0.685842	0.735268	0.760754	0.443125	0.609102	0.437852	0.522863	0.517008	0.561631	0.835737	0.820712	0.755085	0.657408	0.705808
rs314822404	USP6NL	419104	1	5911527	intron-variant	ss537924362	AX-75487748	A/C	0.841863	0.760041	0.888358	0.855544	0.256139	0.101607	0.697506	0.171641	0.85231	0.28868	0.712716	0.433533	0.0253262	0.040949	0.325939	0.282282	0.482614	0.157952	0.282328	0.492393	0.163972	0.965657	0.136571	0.876281	0.781605	0.587518	0.540984	0.397152	0.380752	0.297655	0.16396	0.281091	0.148228	0.147619	0.229502	0.138056	0.40082	0.365026	0.406947	0.446982	0.467681
rs13826450	USP6NL	419104	1	5915345	intron-variant	ss537727680	AX-75487824	C/T	0.92165	0.9385	0.509489	0.776825	0.968742	0.998507	0.0459191	0.825428	0.262277	0.398743	0.154855	0.465428	0.333082	0.284434	0.176004	0.204839	0.842024	0.0732705	0.206176	0.244393	0.246356	0.399932	0.568335	0.6334	0.26784	0.521768	0.629697	0.81625	0.81847	0.537857	0.577705	0.48193	0.595357	0.759637	0.496524	0.707371	0.788323	0.712543	0.659978	0.692565	0.498864
rs316894260	USP6NL	419104	1	5919154	intron-variant	ss538039372	AX-75487907	A/G	0.760544	0.565976	0.852695	0.827565	0.952349	0.524945	0.0323969	0.646864	0.195892	0.234666	0.159517	0.236964	0.565186	0.428513	0.856747	0.276761	0.146863	0.690447	0.279609	0.716586	0.541246	0.412104	0.561878	0.408728	0.248778	0.0685385	0.768018	0.830067	0.809119	0.43717	0.285588	0.299756	0.263183	0.375524	0.242744	0.381361	0.850592	0.735605	0.747814	0.78781	0.703156
rs316630597	USP6NL	419104	1	5919213	intron-variant	ss538267386	AX-75487911	G/T	0.508392	0.798994	0.828466	0.995776	0.437472	0.138436	0.529761	0.987169	0.71712	0.0472254	0.0462528	0.0590909	0.150111	0.359907	0.551477	0.967587	0.739098	0.709783	0.96556	0.633346	0.0803721	0.767436	0.628922	0.376339	0.40207	0.495781	0.527009	0.485525	0.459242	0.242066	0.135633	0.195894	0.122463	0.167796	0.133386	0.136799	0.395632	0.358722	0.383453	0.451093	0.375665
rs313562117	USP6NL	419104	1	5920361	intron-variant	ss538049535	AX-80984148	C/G	0.700269	0.110685	0.929868	0.43389	0.827325	0.901497	0.00690749	0.952998	0.145359	0.386055	0.0403445	0.616494	0.896754	0.960814	0.925884	0.830482	0.334386	0.820715	0.832786	0.744488	0.358081	0.415308	0.56929	0.784768	0.230898	0.849134	0.155807	0.154428	0.164816	0.400058	0.753868	0.701954	0.775781	0.667133	0.80068	0.517686	0.193703	0.215552	0.216235	0.200802	0.229868
rs312916134	USP6NL	419104	1	5921195	intron-variant	ss537808096	AX-75487962	C/T	0.317536	0.991784	0.886434	0.585342	0.646012	0.157553	0.583131	0.820875	0.6673	0.0632446	0.0609959	0.0649003	0.227519	0.639544	0.524358	0.779101	0.623572	0.552371	0.783121	0.466251	0.115402	0.66571	0.719421	0.25744	0.334862	0.232614	0.431583	0.380931	0.352591	0.145552	0.0802617	0.12383	0.0704121	0.103688	0.0842513	0.0832972	0.316144	0.286757	0.321093	0.389784	0.328079
rs314909558	USP6NL	419104	1	5922220	reference,synonymous-codon	ss537861634	AX-75487984	C/T	0.989821	0.921314	0.830641	0.829765	0.975864	0.94778	0.0343459	0.675095	0.375302	0.285866	0.139012	0.3014	0.201683	0.31143	0.257361	0.155845	0.645199	0.10158	0.156936	0.315848	0.365969	0.545566	0.270937	0.432934	0.270362	0.469971	0.540283	0.700666	0.69968	0.458502	0.434358	0.369563	0.45018	0.623728	0.364779	0.531379	0.689165	0.62178	0.573483	0.601942	0.427235
rs313596810	USP6NL	419104	1	5922962	intron-variant	ss537792133	AX-75488005	C/T	0.923657	0.180478	0.478671	0.241599	0.576397	0.120982	0.2716	0.503897	0.217333	0.35956	0.580145	0.344582	0.240522	0.429393	0.247908	0.353522	0.171615	0.0507893	0.353527	0.399989	0.897913	0.569346	0.569852	0.714933	0.95494	0.237514	0.448547	0.527802	0.542933	0.723773	0.867124	0.97561	0.776133	0.774575	0.804983	0.932707	0.529073	0.632094	0.584958	0.585774	0.481543
rs316985173	USP6NL	419104	1	5926548	intron-variant	ss538182659	AX-75488081	A/G	0.774901	0.871721	0.82698	0.661355	0.78729	0.826152	0.0918137	0.911357	0.442449	0.434501	0.104993	0.447845	0.150948	0.1532	0.36206	0.0716341	0.426946	0.0996137	0.0728001	0.335105	0.539492	0.560709	0.306515	0.471848	0.38437	0.179795	0.359681	0.461866	0.45077	0.213254	0.214132	0.181099	0.216774	0.33287	0.25321	0.265632	0.580274	0.510963	0.496313	0.545183	0.395966
rs313354226	USP6NL	419104	1	5927046	intron-variant	ss538054262	AX-75488095	G/T	0.516661	0.739386	0.586956	0.617336	0.573625	0.404494	0.996058	0.778245	0.865034	0.0907368	0.0569047	0.120033	0.346425	0.560778	0.250051	0.710556	0.80716	0.202589	0.712545	0.915549	0.076263	0.955578	0.804357	0.446694	0.31933	0.864495	0.292433	0.290871	0.276178	0.155486	0.132927	0.166291	0.135512	0.189183	0.1443	0.125361	0.22663	0.228141	0.235822	0.292267	0.204518
rs80611986	USP6NL	419104	1	5931566	intron-variant	ss538026948	AX-75488193	C/T	0.750298	0.418523	0.579604	0.899249	0.516753	0.62445	0.971576	0.339577	0.804042	0.576014	0.259402	0.720943	0.177857	0.348311	0.722342	0.399768	0.378312	0.851922	0.399707	0.496178	0.830559	0.852212	0.793503	0.627438	0.840381	0.113084	0.129956	0.180463	0.194406	0.244223	0.417273	0.310342	0.40098	0.439193	0.389145	0.378329	0.316984	0.254298	0.233403	0.209402	0.181604
rs80744923	USP6NL	419104	1	5934362	intron-variant	ss537942432	AX-75488264	C/T	0.567543	0.260285	0.693341	0.884006	0.44025	0.225203	0.274609	0.932107	0.633836	0.886511	0.994397	0.524227	0.542109	0.284014	0.574378	0.499799	0.83887	0.427733	0.499807	0.685097	0.929182	0.942273	0.869477	0.119382	0.973522	0.0888105	0.114964	0.14949	0.156479	0.171516	0.319261	0.25418	0.28938	0.319165	0.260373	0.271191	0.216957	0.178059	0.174394	0.170628	0.14806
rs318202888	USP6NL	419104	1	5937468	intron-variant	ss538233488	AX-75488332	A/G	0.567543	0.260285	0.693341	0.884006	0.44025	0.225203	0.284118	0.932107	0.633836	0.886511	0.947755	0.524227	0.542109	0.284014	0.574378	0.499799	0.83887	0.427733	0.499807	0.685097	0.929182	0.942273	0.869477	0.119382	0.846806	0.0888105	0.112844	0.145628	0.151372	0.165078	0.310746	0.243081	0.276129	0.302425	0.243668	0.254848	0.203428	0.166294	0.162418	0.157204	0.135538
rs313641168	USP6NL	419104	1	5941543	intron-variant	ss538228823	AX-75488403	A/G	0.463505	0.266881	0.329476	0.938693	0.485619	0.360567	0.279427	0.620094	0.518376	0.855033	0.904203	0.43738	0.452184	0.320262	0.810856	0.337621	0.539988	0.530637	0.337624	0.5272	0.813002	0.822567	0.46732	0.052275	0.830578	0.117582	0.134016	0.181507	0.188989	0.135043	0.262506	0.206998	0.24085	0.27007	0.212702	0.295127	0.250378	0.199316	0.192238	0.182549	0.15657
rs315304067	USP6NL	419104	1	5943597	intron-variant	ss538136590	AX-75488450	C/T	0.546296	0.868285	0.975445	0.524711	0.934539	0.346339	0.833851	0.570462	0.724441	0.179697	0.12547	0.388018	0.107888	0.104181	0.866785	0.629072	0.512918	0.593767	0.629136	0.667378	0.268075	0.616425	0.533583	0.724557	0.471872	0.987683	0.949182	0.993653	0.966965	0.635159	0.408003	0.559574	0.405359	0.472791	0.463508	0.401699	0.895692	0.945572	0.968859	0.85576	0.957631
rs317318840	USP6NL	419104	1	5945640	intron-variant	ss538066412	AX-75488488	C/T	0.779073	0.914228	0.917136	0.38336	0.269013	0.500974	0.782628	0.395514	0.917387	0.425341	0.595289	0.173914	0.866717	0.332655	0.639901	0.415583	0.62084	0.721596	0.413788	0.17175	0.497501	0.591452	0.970215	0.0767808	0.765603	0.350818	0.549525	0.554921	0.544676	0.564797	0.608546	0.549466	0.560702	0.591649	0.495073	0.606195	0.514363	0.414194	0.370842	0.349504	0.357817
rs316128800	USP6NL	419104	1	5946097	intron-variant	ss538220778	AX-75488499	G/T	0.567543	0.260285	0.693341	0.884006	0.44025	0.225203	0.284118	0.932107	0.633836	0.886511	0.947755	0.524227	0.542109	0.284014	0.574378	0.499799	0.83887	0.427733	0.499807	0.685097	0.929182	0.942273	0.869477	0.119382	0.846806	0.0888105	0.112844	0.145628	0.151372	0.165078	0.310746	0.243081	0.276129	0.302425	0.243668	0.254848	0.203428	0.166294	0.162418	0.157204	0.135538
rs313563304	USP6NL	419104	1	5947048	intron-variant	ss538187354	AX-80941806	A/T	0.293343	0.642567	0.726979	0.367417	0.882523	0.109427	0.54378	0.428986	0.973686	0.327069	0.074325	0.473159	0.295698	0.627746	0.787788	0.282896	0.29861	0.354318	0.284033	0.99479	0.335755	0.54075	0.621201	0.756305	0.294103	0.30457	0.604694	0.568819	0.539549	0.219122	0.178522	0.22766	0.159423	0.210221	0.193273	0.186409	0.565259	0.595173	0.699954	0.811221	0.699395
rs314534829	USP6NL	419104	1	5948363	intron-variant	ss538027520	AX-75488555	A/G	0.271008	0.470859	0.697062	0.840393	0.95664	0.123275	0.491053	0.820631	0.658101	0.57617	0.0514771	0.460634	0.201945	0.803304	0.818645	0.574846	0.593895	0.384964	0.572101	0.0555329	0.96463	0.734338	0.662861	0.425157	0.53392	0.445315	0.167304	0.252106	0.286675	0.636073	0.911688	0.772025	0.977522	0.968561	0.974181	0.764402	0.328267	0.317973	0.237745	0.199866	0.136433
rs316334598	USP6NL	419104	1	5954131	intron-variant	ss537998148	AX-80902588	C/G	0.656031	0.582016	0.80142	0.931141	0.619219	0.718563	0.12729	0.259569	0.446657	0.172925	0.0287659	0.23043	0.798393	0.994206	0.273343	0.722977	0.73963	0.309048	0.725224	0.869774	0.39177	0.928022	0.67325	0.815373	0.234456	0.471801	0.305757	0.290219	0.309273	0.537712	0.772512	0.721057	0.747708	0.631526	0.825569	0.644305	0.449366	0.413836	0.408259	0.352164	0.418936
rs313154013	USP6NL	419104	1	5958694	intron-variant	ss538106293	AX-75488760	A/G	0.592464	0.860162	0.747433	0.177891	0.368261	0.954091	0.863805	0.915437	0.950627	0.949809	0.178263	0.661778	0.968633	0.955233	0.456586	0.236248	0.787744	0.1175	0.237244	0.593495	0.325207	0.36538	0.757988	0.525727	0.310012	0.597213	0.564493	0.554166	0.577035	0.902257	0.935954	0.993923	0.964497	0.944388	0.96292	0.968638	0.702452	0.595888	0.534844	0.446335	0.593752
rs315596408	USP6NL	419104	1	5960709	intron-variant	ss537916671	AX-75488797	C/T	0.60529	0.6133	0.822965	0.95039	0.510131	0.646125	0.289582	0.915435	0.317811	0.317211	0.114566	0.473075	0.581329	0.608514	0.692012	0.380242	0.469425	0.451958	0.380329	0.58395	0.835322	0.435632	0.839391	0.924256	0.543546	0.923325	0.436396	0.418387	0.432635	0.732167	0.989345	0.9132	0.972627	0.931211	0.937933	0.927415	0.487702	0.461977	0.409584	0.35392	0.39988
rs314480595	USP6NL	419104	1	5964778	intron-variant	ss538171924	AX-75488875	G/T	0.391179	0.690394	0.89347	0.180919	0.584459	0.489048	0.645764	0.945991	0.852321	0.887558	0.184749	0.898815	0.783228	0.539543	0.280459	0.110507	0.698113	0.0382637	0.111103	0.729199	0.323114	0.323051	0.680962	0.90333	0.356308	0.748963	0.891417	0.962368	0.9393	0.44057	0.603198	0.604987	0.589793	0.712708	0.562432	0.63249	0.853946	0.931488	0.998659	0.893136	0.882895
rs315761998	USP6NL	419104	1	5968603	intron-variant	ss538131083	AX-75488952	A/G	0.608256	0.907117	0.814598	0.850567	0.965723	0.962253	0.355196	0.815411	0.807929	0.254537	0.240377	0.359109	0.0236967	0.0684499	0.918105	0.370507	0.530479	0.58074	0.370493	0.559696	0.909363	0.335581	0.262295	0.701901	0.946591	0.261565	0.536104	0.718568	0.759669	0.705313	0.919037	0.871546	0.936064	0.902366	0.906354	0.90511	0.840809	0.724255	0.650842	0.582182	0.48114
rs315786144	USP6NL	419104	1	5970889	intron-variant	ss538162843	AX-75488992	C/T	0.304409	0.303448	0.951637	0.164408	0.935913	0.327703	0.271666	0.597703	0.575282	0.531052	0.158402	0.740441	0.600585	0.891321	0.449789	0.139589	0.614985	0.0783153	0.140285	0.7157	0.354825	0.699152	0.791957	0.873694	0.339233	0.591783	0.383485	0.391234	0.37579	0.163955	0.206066	0.227928	0.20585	0.268604	0.240624	0.200092	0.39367	0.448665	0.515408	0.61728	0.464626
rs80713698	USP6NL	419104	1	5972314	intron-variant	ss538223089	AX-75489027	C/T	0.636488	0.588508	0.923233	0.376383	0.622089	0.525388	0.640918	0.459313	0.711575	0.425239	0.211985	0.616336	0.880178	0.914013	0.770293	0.40913	0.544222	0.397417	0.412293	0.783261	0.110002	0.999624	0.765445	0.870234	0.15442	0.532002	0.465702	0.466232	0.44568	0.204688	0.210432	0.22012	0.214939	0.293835	0.246604	0.235092	0.447962	0.445298	0.457189	0.514185	0.372043
rs13826342	USP6NL	419104	1	5973999	intron-variant	ss537719874	AX-75489057	C/T	0.923657	0.180478	0.478671	0.241599	0.576397	0.120982	0.189098	0.503897	0.217333	0.35956	0.629432	0.344582	0.240522	0.429393	0.247908	0.353522	0.171615	0.0507893	0.353527	0.399989	0.897913	0.569346	0.569852	0.714933	0.791666	0.237514	0.423255	0.505833	0.522474	0.701782	0.885831	0.95996	0.799724	0.805837	0.843885	0.98427	0.48889	0.58329	0.533411	0.529814	0.426945
rs316224276	USP6NL	419104	1	5975969	intron-variant	ss538035354	AX-75489090	C/T	0.654646	0.843079	0.689645	0.800772	0.832341	0.944175	0.149562	0.942124	0.646003	0.657459	0.0905467	0.693459	0.164593	0.0794427	0.486615	0.108495	0.399905	0.170271	0.11009	0.616332	0.509536	0.70111	0.39876	0.544531	0.129496	0.334815	0.887639	0.779154	0.808744	0.700927	0.716706	0.605964	0.705571	0.888277	0.629343	0.899833	0.812543	0.835433	0.834232	0.789945	0.96052
rs317578053	USP6NL	419104	1	5984185	intron-variant	ss537925238	AX-75489260	C/T	0.725819	0.424353	0.551586	0.898226	0.457532	0.618438	0.878121	0.334861	0.770058	0.583103	0.21197	0.732955	0.17737	0.327466	0.771895	0.408511	0.407845	0.807118	0.408453	0.506393	0.847501	0.857865	0.761635	0.59515	0.725083	0.105574	0.116175	0.163483	0.177859	0.227241	0.489654	0.367656	0.464842	0.541892	0.43997	0.44778	0.286221	0.220668	0.194864	0.166659	0.131982
rs318173069	USP6NL	419104	1	5986510	intron-variant	ss538211622	AX-75489309	G/T	0.416446	0.899894	0.764203	0.430634	0.939976	0.533201	0.717628	0.590269	0.962343	0.459667	0.0421776	0.535839	0.946149	0.404669	0.227303	0.503424	0.939089	0.146268	0.506886	0.633785	0.0914024	0.57985	0.726662	0.534008	0.178993	0.889771	0.773586	0.749526	0.782784	0.638478	0.708699	0.718179	0.704982	0.836648	0.649338	0.822057	0.959215	0.944226	0.930749	0.838166	0.961479
rs315806452	USP6NL	419104	1	5989703	intron-variant	ss537752148	AX-75489372	G/T	0.265545	0.681137	0.944332	0.206688	0.896879	0.0658079	0.403258	0.172528	0.923056	0.169418	0.0305387	0.362814	0.2969	0.351044	0.637357	0.252365	0.312557	0.241432	0.253421	0.998956	0.198042	0.42591	0.38774	0.630153	0.216489	0.314792	0.586479	0.539359	0.507284	0.211373	0.171922	0.226438	0.159965	0.218373	0.208422	0.189411	0.568826	0.611387	0.724032	0.844899	0.751266
rs312301003	USP6NL	419104	1	5990597	intron-variant	ss538178036	AX-75489390	C/T	0.265545	0.681137	0.944332	0.206688	0.896879	0.0658079	0.390551	0.172528	0.923056	0.169418	0.0309337	0.362814	0.2969	0.351044	0.637357	0.252365	0.312557	0.241432	0.253421	0.998956	0.198042	0.42591	0.38774	0.630153	0.22298	0.314792	0.554605	0.508524	0.477282	0.195128	0.158451	0.21037	0.147907	0.204144	0.194732	0.17671	0.541825	0.582897	0.692603	0.81013	0.717965
rs314090256	USP6NL	419104	1	5993565	intron-variant	ss537919786	AX-75489445	A/G	0.271132	0.240411	0.842408	0.238986	0.83794	0.36285	0.196026	0.360113	0.815581	0.237609	0.0383653	0.401602	0.838854	0.896167	0.361754	0.0518344	0.488073	0.0403415	0.0521705	0.637525	0.735161	0.823083	0.575386	0.658541	0.245075	0.40729	0.437118	0.44853	0.425933	0.258981	0.263169	0.265419	0.259513	0.348036	0.308874	0.283281	0.543058	0.631313	0.734649	0.840527	0.761634
rs313153819	USP6NL	419104	1	5996794	intron-variant	ss537813643	AX-75489503	A/G	0.587003	0.50525	0.878145	0.197601	0.477328	0.638539	0.965828	0.216183	0.719068	0.828535	0.18546	0.817481	0.17902	0.484959	0.463826	0.0155527	0.257547	0.0318107	0.0156802	0.193481	0.795695	0.298344	0.740554	0.336574	0.237539	0.343109	0.650061	0.764193	0.752551	0.431735	0.554018	0.469786	0.559408	0.700264	0.547228	0.635425	0.878406	0.943707	0.988491	0.924437	0.917257
rs314158246	USP6NL	419104	1	5999152	intron-variant	ss537836951	AX-75489551	A/G	0.406109	0.817931	0.932204	0.85853	0.321975	0.0537288	0.220847	0.707626	0.790991	0.117861	0.171398	0.137682	0.00432089	0.0477411	0.820763	0.208019	0.984553	0.353874	0.208016	0.133369	0.16251	0.880168	0.135759	0.655198	0.82528	0.807784	0.832514	0.624895	0.59021	0.438815	0.246455	0.425324	0.220945	0.221864	0.317119	0.220314	0.543253	0.533934	0.60745	0.690103	0.74247
rs14790764	USP6NL	419104	1	5999448	intron-variant	ss537975481	AX-75489555	C/T	0.293672	0.88889	0.745283	0.655341	0.59337	0.117181	0.972431	0.769573	0.868891	0.137543	0.0198951	0.168208	0.212532	0.780348	0.793136	0.95488	0.552864	0.8964	0.958778	0.365036	0.129825	0.746455	0.594236	0.438676	0.193243	0.379083	0.976184	0.88345	0.828519	0.394785	0.258138	0.32966	0.225609	0.293241	0.256399	0.290242	0.751514	0.72928	0.79357	0.892136	0.810193
rs316642188	USP6NL	419104	1	6000852	intron-variant	ss537998632	AX-80746541	C/G	0.316795	0.602379	0.766339	0.0686131	0.520441	0.325765	0.432177	0.483363	0.988384	0.615629	0.0721005	0.977272	0.787783	0.845517	0.220975	0.114193	0.721132	0.0279093	0.114796	0.826825	0.202177	0.181997	0.923407	0.50515	0.257342	0.746427	0.742016	0.788078	0.76418	0.347227	0.490542	0.487582	0.490676	0.599619	0.486017	0.525438	0.718894	0.804212	0.8748	0.979124	0.78077
rs316334845	USP6NL	419104	1	6007147	intron-variant	ss537777378	AX-75489718	C/T	0.264172	0.659288	0.782323	0.695415	0.735422	0.618076	0.697182	0.400858	0.709218	0.380141	0.0195686	0.324465	0.646478	0.144318	0.22372	0.309501	0.910632	0.150467	0.312446	0.583457	0.519453	0.662633	0.484401	0.273421	0.126406	0.54995	0.648801	0.611939	0.656252	0.839369	0.81131	0.75316	0.778169	0.942174	0.703039	0.978365	0.747189	0.722737	0.690922	0.618968	0.734566
rs314340480	USP6NL	419104	1	6007628	intron-variant	ss538199129	AX-80865232	A/T	0.0835896	0.378385	0.65844	0.0444945	0.920569	0.00621233	0.109857	0.289715	0.402784	0.0540473	0.013112	0.104441	0.557517	0.444544	0.302446	0.907136	0.982864	0.36435	0.905139	0.745926	0.120225	0.100625	0.25231	0.922464	0.170429	0.280044	0.927768	0.849472	0.80589	0.444208	0.399127	0.476971	0.333232	0.41428	0.404826	0.365529	0.783745	0.845983	0.962244	0.926548	0.995501
rs317403473	USP6NL	419104	1	6011622	upstream-variant-2KB	ss538092834	AX-75489801	C/T	0.216486	0.248862	0.713323	0.00522716	0.742762	0.0547491	0.000326737	0.184775	0.776112	0.463707	0.155205	0.831178	0.310909	0.196944	0.157402	0.596915	0.218174	0.153497	0.59676	0.701418	0.527455	0.277468	0.103134	0.161873	0.714816	0.892484	0.928373	0.768721	0.736529	0.56607	0.713404	0.849905	0.670091	0.660283	0.864403	0.592359	0.759496	0.940787	0.91101	0.801964	0.791206
rs318184436	ECHDC3	419098	1	6032284	intron-variant	ss538197714	AX-80810334	C/G	0.409549	0.689703	0.638672	0.0957464	0.585189	0.0877754	0.172954	0.119062	0.27325	0.272178	0.489342	0.602468	0.377628	0.0243664	0.907123	0.213684	0.738398	0.697682	0.214597	0.544605	0.990413	0.259888	0.0972137	0.0835945	0.720938	0.825548	0.423176	0.537371	0.542274	0.466967	0.736865	0.530483	0.731244	0.752863	0.559362	0.783442	0.436345	0.3776	0.307876	0.285657	0.219042
rs317514633	ECHDC3	419098	1	6033353	intron-variant	ss538001443	AX-75490234	A/G	0.611481	0.681885	0.698098	0.183478	0.817654	0.437704	0.381105	0.925512	0.363622	0.157476	0.66949	0.266264	0.515589	0.107805	0.711413	0.00733311	0.0801817	0.315662	0.00733325	0.892528	0.685179	0.5917	0.0884645	0.483541	0.661159	0.261874	0.257363	0.359241	0.368766	0.240564	0.436588	0.298259	0.405155	0.433223	0.299924	0.478845	0.384363	0.333498	0.316335	0.306567	0.242399
rs314893169	ECHDC3	419098	1	6034307	intron-variant	ss537719791	AX-75490257	A/G	0.254561	0.23478	0.498148	0.0537265	0.466129	0.306569	0.0263439	0.228742	0.973627	0.774857	0.0892903	0.977515	0.342453	0.291928	0.140657	0.118024	0.772775	0.0152539	0.118103	0.482504	0.651334	0.218492	0.758446	0.298866	0.849166	0.412091	0.380122	0.357566	0.342331	0.222356	0.298627	0.370302	0.223841	0.203423	0.221348	0.15853	0.290884	0.323079	0.444958	0.550798	0.626262
rs314146004	LOC426368	426368	1	6184720	intron-variant	ss538094056	AX-80814049	A/T	0.823884	0.633463	0.152216	0.350665	0.774225	0.691965	0.669655	0.881211	0.358223	0.870279	0.293137	0.90272	0.0467435	0.349697	0.254082	0.50689	0.609043	0.479957	0.504304	0.798665	0.204176	0.366893	0.593416	0.710524	0.812002	0.971436	0.521714	0.642197	0.683303	0.793957	0.92026	0.907073	0.852741	0.819175	0.838668	0.750803	0.904397	0.967366	0.908704	0.822185	0.865243
rs315796029	LOC426368	426368	1	6188716	intron-variant	ss538258608	AX-75493461	C/T	0.505948	0.46607	0.834786	0.101985	0.760902	0.471788	0.503109	0.458213	0.539705	0.260309	0.370025	0.215341	0.309376	0.388779	0.245331	0.542746	0.284111	0.355903	0.542776	0.455913	0.21488	0.598237	0.751361	0.964087	0.55963	0.720616	0.936594	0.937747	0.977597	0.745902	0.938921	0.951635	0.907777	0.91272	0.92605	0.992797	0.765381	0.69001	0.544558	0.464375	0.413086
rs315999148	LOC426368	426368	1	6190324	intron-variant	ss537836405	AX-75493491	C/T	0.302755	0.358017	0.262418	0.182125	0.20679	0.62204	0.214523	0.173153	0.334545	0.362597	0.0115182	0.883057	0.261627	0.209623	0.328625	0.614014	0.125948	0.51251	0.610712	0.1142	0.148515	0.0763891	0.106071	0.0247629	0.581375	0.170759	0.344803	0.39666	0.45339	0.838175	0.838661	0.73567	0.96583	0.908049	0.924406	0.750606	0.732134	0.718024	0.55472	0.461504	0.358724
rs317632779	CCDC3	769832	1	6493323	utr-variant-3-prime	ss537905130	AX-75500104	C/T	0.800441	0.402079	0.225872	0.245561	0.687567	0.0638156	0.214503	0.622172	0.14534	0.704316	0.578405	0.66544	0.433199	0.221826	0.226725	0.982007	0.615018	0.0385424	0.981972	0.770659	0.551937	0.313657	0.565463	0.443913	0.783666	0.642717	0.579959	0.50056	0.496701	0.574432	0.448181	0.783255	0.551977	0.470567	0.579936	0.538053	0.421453	0.568549	0.518934	0.527284	0.719802
rs80748603	CCDC3	769832	1	6495106	reference,synonymous-codon	ss538014809	AX-75500150	C/T	0.249547	0.350841	0.27289	0.414707	0.641912	0.0783825	0.224724	0.243625	0.579253	0.27013	0.299325	0.208919	0.3123	0.474785	0.445906	0.344719	0.666121	0.0549442	0.344756	0.698485	0.510758	0.974763	0.362664	0.301669	0.79492	0.940572	0.831091	0.845637	0.818148	0.65185	0.72081	0.892085	0.812443	0.881736	0.909474	0.893011	0.851908	0.990208	0.936542	0.836791	0.718172
rs312465561	CCDC3	769832	1	6495737	intron-variant	ss537848480	AX-75500164	C/T	0.624265	0.815584	0.270494	0.504208	0.646203	0.0993829	0.0950312	0.0778518	0.298121	0.860135	0.208825	0.779447	0.142175	0.204406	0.122025	0.897204	0.946921	0.0744497	0.89701	0.715324	0.354668	0.203108	0.63292	0.126603	0.532681	0.492139	0.514704	0.582507	0.597109	0.95378	0.982515	0.799707	0.882069	0.853884	0.889906	0.946175	0.736961	0.763841	0.815447	0.753474	0.645498
rs317901309	CCDC3	769832	1	6496151	intron-variant	ss537781092	AX-75500176	C/T	0.254702	0.623923	0.458008	0.479285	0.711047	0.00518521	0.0869305	0.206527	0.313149	0.958716	0.179693	0.958665	0.11322	0.213016	0.0554925	0.657559	0.909951	0.0104894	0.657741	0.930773	0.610436	0.372845	0.93641	0.539463	0.24454	0.229835	0.507545	0.511061	0.540064	0.947966	0.946308	0.9145	0.90618	0.810612	0.754204	0.879557	0.776787	0.750945	0.778152	0.700616	0.81055
rs313324397	CCDC3	769832	1	6499684	intron-variant	ss538175135	AX-75500261	G/T	0.459089	0.387971	0.496219	0.399061	0.702034	0.252001	0.30743	0.729085	0.50666	0.605468	0.357927	0.686048	0.799187	0.945518	0.493349	0.350013	0.587016	0.568403	0.348788	0.862104	0.313493	0.436997	0.780002	0.729063	0.88596	0.98964	0.909071	0.813236	0.79306	0.865841	0.94807	0.570092	0.686153	0.707205	0.477164	0.514018	0.64834	0.636521	0.665732	0.644754	0.437866
rs14696096	CCDC3	769832	1	6501741	intron-variant	ss538095809	AX-75500315	C/T	0.63852	0.68603	0.481652	0.603345	0.966119	0.4219	0.241914	0.273433	0.854842	0.655058	0.475121	0.644043	0.623072	0.833691	0.759384	0.238181	0.681848	0.275818	0.238285	0.376537	0.109763	0.533834	0.264061	0.874393	0.571657	0.316529	0.854111	0.785662	0.784863	0.957137	0.854028	0.90934	0.853584	0.920712	0.844517	0.779092	0.842097	0.862134	0.843307	0.782077	0.801336
rs16696151	CCDC3	769832	1	6503127	intron-variant	ss537787129	AX-75500351	G/T	0.589257	0.373086	0.58059	0.392998	0.852914	0.0747967	0.523179	0.700654	0.0571587	0.850045	0.723465	0.971299	0.77904	0.861705	0.047817	0.0154887	0.0672842	0.391365	0.0153656	0.146025	0.775303	0.109311	0.793345	0.770324	0.473517	0.644593	0.494903	0.489615	0.472942	0.619324	0.676292	0.422555	0.506171	0.666127	0.555583	0.555341	0.463597	0.49988	0.623114	0.664072	0.579872
rs313896860	CCDC3	769832	1	6508907	intron-variant	ss537758113	AX-75500471	A/G	0.747863	0.550312	0.76084	0.737103	0.869331	0.0366099	0.140244	0.54279	0.0215739	0.543792	0.561647	0.486122	0.319275	0.394547	0.0769093	0.690784	0.364474	0.0571681	0.69062	0.804332	0.792692	0.0854486	0.590979	0.964928	0.705686	0.0593872	0.516023	0.600218	0.605818	0.703845	0.729495	0.626731	0.721526	0.966464	0.935494	0.895424	0.783709	0.729903	0.850829	0.849428	0.873201
rs314014869	CCDC3	769832	1	6509903	intron-variant	ss538046446	AX-75500493	C/T	0.504914	0.541654	0.689826	0.666164	0.730638	0.627111	0.171898	0.183603	0.479627	0.924459	0.879067	0.500468	0.914265	0.440866	0.305173	0.0264902	0.0719826	0.677613	0.026153	0.0600562	0.83407	0.560453	0.411846	0.0568395	0.234784	0.707982	0.885948	0.992578	0.991734	0.915849	0.743848	0.729583	0.804522	0.807555	0.814225	0.890378	0.951086	0.803289	0.706885	0.677214	0.533337
rs315170999	CCDC3	769832	1	6511651	intron-variant	ss538239183	AX-75500523	C/T	0.675114	0.142211	0.0525259	0.589259	0.603062	0.853576	0.886918	0.095261	0.506424	0.638135	0.384622	0.951569	0.111879	0.162847	0.867486	0.178366	0.374972	0.404043	0.178475	0.371259	0.3907	0.358836	0.777103	0.394867	0.588838	0.650202	0.876433	0.851819	0.81267	0.661905	0.61059	0.461331	0.340208	0.481388	0.394715	0.420085	0.61077	0.551988	0.597816	0.690769	0.605695
rs316954958	CCDC3	769832	1	6511684	intron-variant	ss537766387	AX-75500524	G/T	0.692163	0.279829	0.978286	0.342985	0.737548	0.70987	0.364684	0.710302	0.180055	0.39316	0.720944	0.335865	0.242412	0.8675	0.286462	0.122487	0.27643	0.754968	0.121824	0.336656	0.810094	0.639509	0.825216	0.373728	0.121144	0.430532	0.427517	0.466327	0.490901	0.777635	0.79671	0.933724	0.902059	0.898612	0.707346	0.887314	0.714018	0.905812	0.979178	0.983158	0.657445
rs80602513	CCDC3	769832	1	6514120	intron-variant	ss537933765	AX-75500575	C/T	0.924932	0.217399	0.664018	0.398085	0.907249	0.107468	0.0548044	0.335686	0.174294	0.938122	0.692414	0.991498	0.702713	0.859958	0.119105	0.425382	0.480911	0.147326	0.425318	0.95872	0.31583	0.0368185	0.387953	0.396253	0.788874	0.370337	0.51317	0.527294	0.505165	0.641108	0.592089	0.369881	0.456675	0.633462	0.494632	0.523075	0.482759	0.474672	0.552181	0.560254	0.432585
rs313357235	CCDC3	769832	1	6518362	intron-variant	ss537739819	AX-75500680	C/T	0.973086	0.157098	0.546096	0.971961	0.654722	0.2309	0.436175	0.866144	0.378826	0.685816	0.86257	0.631141	0.875351	0.674139	0.444279	0.956701	0.681248	0.17056	0.956634	0.674281	0.95765	0.991704	0.69696	0.885869	0.2967	0.688102	0.295991	0.232984	0.221098	0.171873	0.218411	0.28063	0.24297	0.257507	0.305942	0.30642	0.258605	0.313465	0.351478	0.385679	0.311412
rs317477604	CCDC3	769832	1	6518402	intron-variant	ss538121915	AX-75500681	C/T	0.603917	0.959468	0.327752	0.501714	0.527969	0.544792	0.930025	0.816013	0.130513	0.39788	0.908756	0.355169	0.801321	0.86575	0.344541	0.341883	0.442487	0.942569	0.341797	0.618406	0.979557	0.423009	0.562341	0.550796	0.549628	0.27188	0.239366	0.280807	0.281664	0.47017	0.412243	0.54936	0.47942	0.645504	0.760158	0.597769	0.342162	0.403496	0.499049	0.54156	0.748421
rs317398147	CCDC3	769832	1	6519861	intron-variant	ss537959972	AX-75500708	A/G	0.782525	0.374758	0.343856	0.715675	0.695515	0.135971	0.896049	0.569046	0.562945	0.534388	0.500161	0.488313	0.660935	0.636388	0.414755	0.420606	0.944543	0.0686706	0.420664	0.831506	0.282752	0.694133	0.671482	0.990172	0.651942	0.334177	0.349388	0.265853	0.255479	0.266308	0.277475	0.360511	0.299883	0.339793	0.349777	0.320975	0.305821	0.365885	0.393275	0.395039	0.344465
rs14736823	CCDC3	769832	1	6521858	intron-variant	ss538209432	AX-75500753	C/T	0.51325	0.83083	0.568396	0.418729	0.58963	0.385408	0.521388	0.799216	0.209596	0.35158	0.681148	0.311282	0.665652	0.951088	0.335895	0.729393	0.613721	0.604198	0.729198	0.946685	0.490856	0.33402	0.317041	0.649139	0.789244	0.15936	0.21843	0.236451	0.236787	0.440248	0.359529	0.489613	0.414424	0.57778	0.643788	0.48621	0.299729	0.357966	0.430584	0.441727	0.619934
rs314547232	CCDC3	769832	1	6527690	intron-variant	ss537879675	AX-75500870	C/T	0.409472	0.657448	0.54508	0.980782	0.903105	0.596828	0.616166	0.628803	0.541931	0.466755	0.743066	0.638216	0.538592	0.146776	0.987167	0.0717304	0.504876	0.197733	0.0712644	0.283504	0.39933	0.546441	0.721177	0.795851	0.703265	0.399813	0.884311	0.726156	0.699697	0.786792	0.795759	0.642289	0.62591	0.541075	0.429858	0.458646	0.503494	0.614079	0.611042	0.630315	0.521782
rs317453716	CCDC3	769832	1	6527802	intron-variant	ss538218706	AX-75500876	C/T	0.973086	0.157098	0.546096	0.971961	0.654722	0.2309	0.453502	0.866144	0.378826	0.685816	0.806746	0.631141	0.875351	0.674139	0.444279	0.956701	0.681248	0.17056	0.956634	0.674281	0.95765	0.991704	0.69696	0.885869	0.307087	0.688102	0.319761	0.254637	0.242847	0.190265	0.239827	0.306258	0.264698	0.278423	0.326904	0.325301	0.276738	0.335404	0.376879	0.414078	0.339624
rs317866135	CCDC3	769832	1	6529647	intron-variant	ss537857211	AX-75500921	A/G	0.423897	0.995995	0.508862	0.596032	0.97047	0.838842	0.720696	0.316135	0.546926	0.290205	0.498089	0.861543	0.508972	0.486202	0.76273	0.196784	0.437794	0.424365	0.196871	0.455201	0.363775	0.375458	0.528665	0.0800118	0.496796	0.414287	0.850377	0.97937	0.985522	0.908444	0.965884	0.967288	0.90557	0.929874	0.694342	0.62484	0.644898	0.856812	0.93133	0.992868	0.996058
rs16744793	CCDC3	769832	1	6532442	intron-variant	ss538184296	AX-75500986	C/T	0.878796	0.60408	0.81998	0.860937	0.843314	0.950533	0.292253	0.257879	0.344519	0.16342	0.156028	0.638913	0.859975	0.825052	0.769718	0.569569	0.908874	0.787461	0.56761	0.841773	0.0832066	0.715046	0.535513	0.105027	0.132307	0.429902	0.258069	0.306843	0.329602	0.513584	0.587196	0.749025	0.862316	0.740769	0.938026	0.974322	0.580056	0.602179	0.598357	0.53976	0.674817
rs315710279	SEPHS1	426612	1	6625577	intron-variant	ss537893868	AX-75503026	A/G	0.163051	0.708606	0.68705	0.476557	0.486263	0.650244	0.46101	0.753845	0.574106	0.701474	0.830511	0.812033	0.557364	0.738013	0.948794	0.30893	0.817218	0.496742	0.309038	0.784961	0.274896	0.832698	0.489019	0.857188	0.536061	0.873226	0.673081	0.915238	0.964978	0.979809	0.962324	0.947444	0.980969	0.937545	0.824401	0.716357	0.990726	0.788076	0.730018	0.650555	0.779793
rs80724759	SEPHS1	426612	1	6628134	intron-variant	ss537915327	AX-75503084	C/T	0.469313	0.81264	0.688253	0.472873	0.676793	0.736035	0.845809	0.286966	0.0373081	0.988325	0.468522	0.599142	0.442556	0.59083	0.960021	0.303411	0.95505	0.717779	0.302153	0.984455	0.0695583	0.374391	0.602734	0.260669	0.11765	0.63467	0.715119	0.748147	0.764604	0.75791	0.558311	0.736466	0.62457	0.745251	0.775239	0.730592	0.680822	0.734927	0.682842	0.715577	0.921493
rs316819420	SEPHS1	426612	1	6631463	intron-variant	ss538001729	AX-75503150	G/T	0.315737	0.595501	0.227849	0.0807758	0.629868	0.611028	0.953326	0.596704	0.810334	0.761703	0.828538	0.869159	0.908342	0.278022	0.579406	0.0622521	0.413755	0.554406	0.0611947	0.350843	0.982442	0.390822	0.943447	0.830478	0.451531	0.782568	0.41107	0.444189	0.466582	0.366018	0.337361	0.652632	0.544467	0.481245	0.626347	0.674804	0.503702	0.569562	0.53964	0.541186	0.606069
rs14747228	SEPHS1	426612	1	6634364	intron-variant	ss537738984	AX-75503212	A/G	0.398579	0.778817	0.596922	0.540786	0.701519	0.656237	0.856184	0.520414	0.10723	0.687126	0.243492	0.997019	0.796994	0.433518	0.711432	0.196789	0.769645	0.870506	0.19501	0.59273	0.0375533	0.603017	0.888344	0.337699	0.324694	0.520548	0.974153	0.988552	0.96589	0.74838	0.562645	0.775947	0.588493	0.683814	0.730558	0.591064	0.770299	0.875918	0.882119	0.987925	0.870394
rs313607692	SEPHS1	426612	1	6638032	intron-variant	ss538279062	AX-75503290	A/G	0.996609	0.985836	0.706461	0.737949	0.774514	0.969282	0.589474	0.47475	0.416702	0.482006	0.465204	0.343394	0.533413	0.41482	0.495013	0.602147	0.504627	0.619964	0.598557	0.288371	0.309196	0.630435	0.416629	0.640034	0.603336	0.842993	0.461647	0.566728	0.623579	0.953888	0.969777	0.921173	0.896167	0.855162	0.883691	0.670756	0.846995	0.74843	0.647337	0.525038	0.650767
rs313202382	SEPHS1	426612	1	6640426	intron-variant	ss537949064	AX-75503348	A/G	0.440463	0.992483	0.176365	0.105273	0.615218	0.560693	0.967086	0.685992	0.0498123	0.975436	0.622243	0.472823	0.439642	0.862066	0.349726	0.362069	0.301358	0.809048	0.359436	0.358529	0.114571	0.892643	0.765982	0.254432	0.163381	0.28904	0.486918	0.529119	0.544342	0.411701	0.524923	0.683592	0.557579	0.389507	0.496928	0.579944	0.493586	0.475947	0.477161	0.439692	0.316524
rs315150514	SEPHS1	426612	1	6641958	intron-variant	ss538163992	AX-75503383	C/T	0.953596	0.967482	0.143911	0.452024	0.40356	0.99524	0.58462	0.49523	0.0301162	0.620016	0.613968	0.955826	0.409969	0.544733	0.477085	0.543505	0.405902	0.812304	0.540303	0.214316	0.0782639	0.782735	0.668845	0.447897	0.143258	0.707373	0.831608	0.856001	0.90175	0.65393	0.902644	0.870553	0.830764	0.960507	0.886925	0.764342	0.984087	0.976256	0.971058	0.889844	0.735634
rs314098641	SEPHS1	426612	1	6642266	intron-variant	ss538092588	AX-75503389	A/G	0.249806	0.339017	0.965467	0.121935	0.704797	0.154519	0.941335	0.127616	0.152381	0.879874	0.603499	0.723947	0.439825	0.978803	0.916745	0.798534	0.583909	0.593171	0.798605	0.427894	0.157167	0.356415	0.619163	0.189156	0.460727	0.978609	0.488575	0.518217	0.498251	0.524241	0.431851	0.48003	0.416336	0.474271	0.409125	0.374661	0.388208	0.522722	0.590372	0.697135	0.820032
rs314614343	SEPHS1	426612	1	6644487	intron-variant	ss538166199	AX-75503438	C/T	0.632227	0.33307	0.691817	0.432121	0.757209	0.330291	0.786401	0.893863	0.364042	0.551764	0.73072	0.334819	0.372458	0.684802	0.877151	0.207305	0.420668	0.391823	0.205531	0.672995	0.0895192	0.787602	0.912128	0.465316	0.0820656	0.238865	0.591719	0.471991	0.487429	0.599372	0.469871	0.6972	0.421795	0.315798	0.461105	0.494604	0.435795	0.393506	0.343036	0.292366	0.304782
rs318189115	SEPHS1	426612	1	6644628	intron-variant	ss538043759	AX-75503444	C/T	0.215231	0.325552	0.591736	0.988949	0.524021	0.137635	0.725395	0.681201	0.243848	0.950606	0.688349	0.753363	0.341472	0.979375	0.975827	0.339555	0.535343	0.412776	0.337147	0.452697	0.060917	0.688422	0.976178	0.701423	0.0769588	0.601187	0.930369	0.766656	0.815563	0.856034	0.818578	0.861863	0.994435	0.845756	0.926629	0.862682	0.945095	0.908793	0.777065	0.666708	0.691932
rs317022513	SEPHS1	426612	1	6645288	upstream-variant-2KB	ss537938349	AX-75503459	C/T	0.325288	0.917175	0.0967941	0.0415684	0.76277	0.413097	0.628449	0.9648	0.0992429	0.765842	0.608978	0.758818	0.463674	0.537572	0.661436	0.531112	0.575247	0.857657	0.529432	0.836179	0.0287025	0.660324	0.871829	0.374787	0.37185	0.243787	0.327652	0.407643	0.439629	0.515885	0.616367	0.740058	0.60177	0.485557	0.581767	0.804172	0.438854	0.388333	0.359901	0.292498	0.228281
rs313028671	SEPHS1	426612	1	6646433	upstream-variant-2KB	ss538030077	AX-75503483	G/T	0.487031	0.462412	0.815165	0.177323	0.635752	0.679107	0.923883	0.0826711	0.176712	0.918249	0.731908	0.55809	0.34011	0.990559	0.710011	0.953096	0.463988	0.846395	0.953031	0.378353	0.122648	0.339531	0.440684	0.0597637	0.511659	0.721894	0.402671	0.388052	0.381837	0.518514	0.343748	0.476255	0.331887	0.410907	0.398854	0.316603	0.302997	0.39227	0.4327	0.503285	0.799831
rs312376081	MIR1460	100315704	1	6826770	intron-variant	ss537934345	AX-75507336	A/G	0.44363	0.298754	0.523519	0.412732	0.905721	0.990193	0.688852	0.470723	0.041235	0.55026	0.209724	0.493877	0.65376	0.737143	0.671366	0.456647	0.347411	0.999107	0.46313	0.780465	0.0833314	0.11609	0.155941	0.840858	0.132439	0.781013	0.554072	0.679672	0.677581	0.51949	0.470005	0.469221	0.600954	0.609604	0.552117	0.585506	0.901362	0.837245	0.901332	0.91676	0.759358
rs14738841	SUV39H2	426314	1	7322300	intron-variant	ss537846622	AX-75516509	A/G	0.163644	0.811865	0.107464	0.423896	0.0255503	0.188848	0.182266	0.719037	0.0601157	0.296261	0.0279871	0.249795	0.665305	0.227307	0.387344	0.201539	0.246685	0.788535	0.199634	0.83316	0.0231522	0.277867	0.262334	0.837771	0.736672	0.999199	0.034612	0.0288504	0.0320194	0.114747	0.0444981	0.102633	0.129636	0.235302	0.276321	0.202386	0.178839	0.128109	0.123206	0.113202	0.156542
rs16747616	SUV39H2	426314	1	7323244	intron-variant	ss537758752	AX-75516530	A/G	0.600071	0.959661	0.0866723	0.737452	0.683126	0.801425	0.160122	0.840142	0.366494	0.191382	0.553139	0.52367	0.889254	0.511282	0.850882	0.0834877	0.351729	0.291692	0.0830544	0.551311	0.019891	0.054743	0.576901	0.202692	0.77274	0.199032	0.195706	0.208593	0.219603	0.419571	0.379216	0.417056	0.500296	0.574496	0.563586	0.61391	0.489274	0.339496	0.371929	0.376136	0.426471
rs313655809	SUV39H2	426314	1	7326327	utr-variant-3-prime	ss537735191	AX-75516583	C/T	0.163644	0.811865	0.107464	0.423896	0.0255503	0.188848	0.190555	0.719037	0.0601157	0.296261	0.0329306	0.249795	0.665305	0.227307	0.387344	0.201539	0.246685	0.788535	0.199634	0.83316	0.0231522	0.277867	0.262334	0.837771	0.723719	0.999199	0.0376849	0.0314247	0.034778	0.122123	0.047962	0.10955	0.139232	0.250437	0.291772	0.215532	0.189464	0.136496	0.131686	0.121123	0.166579
rs312527625	SUV39H2,DCLRE1C	426314,430764	1	7328176	downstream-variant-500B,intron-variant	ss537882369	AX-75516602	C/T	0.171982	0.650039	0.425072	0.405302	0.0398676	0.29786	0.102856	0.415615	0.229213	0.617077	0.174111	0.608304	0.987453	0.607743	0.397232	0.791557	0.811921	0.430132	0.785985	0.919282	0.228447	0.799879	0.0964129	0.633309	0.329864	0.426256	0.407851	0.378295	0.384101	0.473322	0.280166	0.453315	0.444293	0.679899	0.676419	0.602816	0.609377	0.598495	0.576319	0.537312	0.617705
rs314758810	DCLRE1C	430764	1	7329987	reference,synonymous-codon	ss537902041	AX-75516614	C/T	0.502681	0.688822	0.53797	0.747074	0.960068	0.402991	0.0505334	0.059193	0.110102	0.640546	0.497767	0.354574	0.335313	0.309562	0.408006	0.874868	0.305513	0.290344	0.874833	0.758162	0.556106	0.712435	0.702479	0.120262	0.026696	0.851877	0.111918	0.0834139	0.0917128	0.190972	0.112086	0.173228	0.24057	0.343507	0.263046	0.237513	0.240411	0.22076	0.189366	0.183378	0.232966
rs14738859	DCLRE1C	430764	1	7333993	intron-variant	ss538259651	AX-75516680	A/G	0.663838	0.697348	0.165755	0.328471	0.119589	0.425598	0.0125265	0.315994	0.609916	0.716466	0.627033	0.935258	0.769066	0.746669	0.920494	0.180212	0.66282	0.47456	0.178339	0.511408	0.43051	0.151779	0.361563	0.247451	0.166865	0.742326	0.972704	0.958756	0.955134	0.849335	0.870486	0.848902	0.876498	0.741413	0.798715	0.679915	0.834211	0.942417	0.899312	0.927955	0.905088
rs317103155	DCLRE1C	430764	1	7334223	intron-variant	ss538015781	AX-75516681	A/G	0.878304	0.374925	0.394025	0.879817	0.945635	0.857092	0.520699	0.130032	0.497408	0.561498	0.325512	0.457138	0.615584	0.4367	0.925195	0.242205	0.284707	0.466685	0.243505	0.906791	0.275309	0.339749	0.359344	0.378139	0.0833305	0.286448	0.166219	0.160296	0.169055	0.354268	0.341004	0.342186	0.419584	0.373814	0.434573	0.387016	0.332658	0.248714	0.257954	0.266839	0.284023
rs315270241	DCLRE1C	430764	1	7338161	intron-variant	ss538146706	AX-75516759	A/G	0.55091	0.525931	0.950755	0.673167	0.720703	0.626025	0.151831	0.739336	0.286797	0.441821	0.878566	0.93681	0.585919	0.75268	0.435387	0.238772	0.835527	0.100756	0.240003	0.921709	0.138811	0.107678	0.150266	0.178829	0.286713	0.0400083	0.93565	0.886631	0.863394	0.980745	0.817834	0.992246	0.858048	0.718083	0.975312	0.923706	0.796935	0.675126	0.755123	0.797323	0.850274
rs10730516	DMTF1	418646	1	7362172	utr-variant-3-prime	ss537921406	AX-75517032	C/T	0.769891	0.905779	0.602911	0.496035	0.253132	0.736304	0.869765	0.935534	0.55266	0.108877	0.553016	0.219463	0.662442	0.0432011	0.294428	0.0774127	0.245982	0.895994	0.0762571	0.870229	0.0486132	0.431081	0.0843067	0.715983	0.870418	0.822958	0.296918	0.273277	0.299611	0.174479	0.248873	0.265675	0.267878	0.244928	0.181341	0.241587	0.179128	0.227124	0.178461	0.183835	0.147113
rs317685603	DMTF1	418646	1	7363072	reference,synonymous-codon	ss538255891	AX-75517057	C/T	0.431364	0.988552	0.118735	0.838315	0.827943	0.833662	0.0196174	0.318848	0.733097	0.0397356	0.513744	0.212788	0.637874	0.785762	0.729525	0.415057	0.554943	0.860661	0.415024	0.773054	0.00484131	0.130229	0.0791942	0.0788325	0.157582	0.356594	0.0742434	0.085224	0.0949232	0.0910886	0.109367	0.176434	0.147801	0.134284	0.171536	0.185231	0.12545	0.107046	0.10435	0.0986599	0.0778709
rs13825936	DMTF1	418646	1	7369916	intron-variant	ss537890064	AX-75517164	C/T	0.0976378	0.321148	0.507559	0.724942	0.543655	0.501412	0.896008	0.674438	0.905263	0.375276	0.715644	0.585007	0.309337	0.187077	0.393984	0.318569	0.750375	0.15163	0.321429	0.572228	0.306731	0.366983	0.106871	0.508101	0.523698	0.129236	0.772344	0.674431	0.658155	0.814179	0.546874	0.758362	0.643955	0.711379	0.934815	0.720827	0.762843	0.878558	0.838271	0.813264	0.962085
rs315602091	DMTF1	418646	1	7375936	reference,synonymous-codon	ss538057576	AX-75517266	A/G	0.494152	0.394385	0.138994	0.188754	0.118626	0.168781	0.482622	0.656679	0.657739	0.49141	0.0295858	0.652125	0.0491015	0.157577	0.825598	0.666794	0.923161	0.932361	0.666913	0.129907	0.000705893	0.609648	0.219254	0.508737	0.824254	0.406428	0.181784	0.194116	0.212198	0.165006	0.128519	0.147309	0.195702	0.251203	0.262497	0.289184	0.377931	0.352764	0.343476	0.383368	0.352118
rs15188921	DMTF1	418646	1	7377114	intron-variant	ss538250029	AX-75517281	C/T	0.594012	0.803261	0.221202	0.893296	0.0715285	0.805627	0.590632	0.900578	0.337465	0.0794571	0.284075	0.134077	0.560971	0.219924	0.305557	0.1314	0.267599	0.748189	0.129551	0.645328	0.502134	0.458701	0.0349055	0.48783	0.90342	0.436741	0.645904	0.590069	0.613415	0.433187	0.60134	0.596823	0.555153	0.480755	0.378417	0.481438	0.338628	0.428557	0.348634	0.33672	0.27483
rs315393274	DMTF1	418646	1	7382995	intron-variant	ss538166806	AX-75517358	A/G	0.127866	0.663545	0.900663	0.254629	0.576862	0.230763	0.563226	0.850643	0.711063	0.184038	0.976004	0.39307	0.524714	0.37413	0.236705	0.417192	0.814234	0.071049	0.421123	0.966111	0.193481	0.277111	0.0394208	0.308292	0.173807	0.0851792	0.968895	0.876062	0.872619	0.952225	0.687794	0.854274	0.781301	0.952286	0.922971	0.982029	0.96523	0.923157	0.993861	0.987519	0.766306
rs80753047	DMTF1	418646	1	7383649	intron-variant	ss537947631	AX-75517370	C/T	0.279725	0.958732	0.786767	0.966978	0.322259	0.646108	0.564385	0.976565	0.368457	0.068824	0.87266	0.144007	0.46498	0.0422775	0.123357	0.592677	0.373009	0.145397	0.585915	0.877555	0.414826	0.863375	0.0153596	0.461605	0.574238	0.212633	0.600972	0.659516	0.687869	0.47922	0.760672	0.644694	0.678035	0.538313	0.483223	0.53918	0.452647	0.462842	0.444123	0.454975	0.283824
rs317708668	DMTF1	418646	1	7384390	intron-variant	ss537778801	AX-75517386	C/T	0.202018	0.961804	0.908944	0.518906	0.712885	0.313071	0.537609	0.905136	0.605786	0.246775	0.928007	0.450879	0.429621	0.328853	0.283464	0.39032	0.882886	0.0789087	0.394133	0.999302	0.334097	0.248436	0.0470643	0.501381	0.329556	0.160054	0.685714	0.55775	0.556473	0.627933	0.399853	0.559505	0.518327	0.672602	0.643725	0.697963	0.693543	0.778333	0.696106	0.680957	0.901423
rs314319604	DMTF1	418646	1	7388192	intron-variant	ss537857506	AX-75517439	A/G	0.599042	0.816349	0.314976	0.624692	0.613447	0.556823	0.954607	0.395783	0.994655	0.188946	0.406641	0.124751	0.360826	0.0712852	0.0725842	0.172238	0.135323	0.15089	0.168833	0.885083	0.0582342	0.548971	0.475842	0.560408	0.592195	0.30115	0.897325	0.831713	0.849373	0.793946	0.98637	0.862488	0.986326	0.877522	0.9646	0.749726	0.867424	0.966686	0.945584	0.965495	0.789318
rs13817886	DMTF1	418646	1	7389120	intron-variant	ss538041139	AX-75517446	A/G	0.151013	0.566743	0.514798	0.941138	0.659193	0.61275	0.912303	0.632143	0.811087	0.461082	0.672413	0.643128	0.275796	0.161425	0.451885	0.301494	0.694295	0.166497	0.304262	0.595119	0.190252	0.340033	0.122262	0.713125	0.75697	0.212905	0.582159	0.502107	0.48749	0.61765	0.378663	0.568271	0.48205	0.542853	0.741867	0.547812	0.604224	0.705699	0.661265	0.642729	0.855378
rs14790471	DMTF1	418646	1	7389412	intron-variant	ss537894212	AX-75517452	A/G	0.856332	0.996789	0.157644	0.512938	0.743836	0.920957	0.876395	0.379881	0.773941	0.186567	0.927083	0.138003	0.471935	0.0820217	0.0717032	0.325077	0.241975	0.11243	0.319927	0.687249	0.0057982	0.592314	0.225149	0.763419	0.97029	0.23971	0.496051	0.468578	0.478795	0.843271	0.592162	0.795632	0.649259	0.746403	0.881472	0.872554	0.835659	0.757559	0.787224	0.769311	0.933481
rs15188878	DMTF1	418646	1	7390509	upstream-variant-2KB	ss537722728	AX-75517466	A/C	0.114234	0.435518	0.104369	0.153169	0.507093	0.243079	0.99048	0.373453	0.968796	0.678965	0.37493	0.332723	0.744559	0.339284	0.287781	0.0271854	0.126903	0.887909	0.0268037	0.752944	0.00586245	0.134294	0.485815	0.23006	0.640903	0.899521	0.697797	0.734847	0.747163	0.950926	0.910894	0.912429	0.999922	0.989812	0.937285	0.871178	0.979105	0.805168	0.900027	0.909784	0.916975
rs15188869	DMTF1	418646	1	7391175	upstream-variant-2KB	ss537924134	AX-80977418	A/T	0.968774	0.564443	0.144322	0.315407	0.771271	0.828386	0.99061	0.363249	0.747239	0.171847	0.987513	0.165855	0.361387	0.0454317	0.0875025	0.289824	0.245027	0.14607	0.28501	0.630197	0.00365745	0.696038	0.165208	0.588746	0.749724	0.409396	0.363806	0.345438	0.355902	0.673555	0.441495	0.62675	0.509169	0.600375	0.721697	0.725374	0.710121	0.633374	0.656782	0.64522	0.799575
rs314311772	SEMA3D	396332	1	8176714	intron-variant	ss538206925	AX-75533100	G/T	0.0514262	0.385799	0.929724	0.0260063	0.302011	0.0836284	0.97741	0.300085	0.489704	0.140443	0.350152	0.244647	0.266606	0.28937	0.129212	0.789466	0.344774	0.0703787	0.793483	0.747988	0.241629	0.983498	0.134733	0.750231	0.702407	0.0677215	0.864316	0.9681	0.997722	0.955334	0.810204	0.889975	0.835453	0.899003	0.832856	0.969911	0.836987	0.937576	0.77466	0.750124	0.842931
rs15188216	SEMA3D	396332	1	8182601	intron-variant	ss537859080	AX-80932280	C/G	0.734955	0.318661	0.411048	0.546054	0.330558	0.441294	0.632379	0.178251	0.350533	0.800547	0.970549	0.620307	0.00454875	0.0036445	0.104812	0.510967	0.287797	0.286786	0.507379	0.373701	0.554183	0.535338	0.51266	0.385022	0.369024	0.698352	0.653894	0.609281	0.634389	0.944464	0.889793	0.771249	0.85266	0.982176	0.990023	0.796208	0.872426	0.965615	0.969034	0.994	0.898936
rs312540263	SEMA3D	396332	1	8184910	intron-variant	ss537860800	AX-80747931	A/T	0.736577	0.414352	0.136871	0.551943	0.881884	0.704532	0.788114	0.18896	0.0158105	0.533977	0.311855	0.796088	0.471295	0.234507	0.386414	0.986539	0.458555	0.363069	0.986491	0.0950668	0.402205	0.788038	0.390941	0.238234	0.750617	0.777332	0.404843	0.465512	0.484069	0.447054	0.751082	0.748661	0.720226	0.806739	0.86115	0.573615	0.645448	0.54328	0.813133	0.770378	0.583348
rs316320160	SEMA3D	396332	1	8188068	intron-variant	ss538101342	AX-75533324	A/G	0.600673	0.116436	0.87671	0.873546	0.27458	0.62823	0.389117	0.0578714	0.891494	0.399108	0.177113	0.656914	0.179574	0.362842	0.021715	0.207588	0.0264727	0.118058	0.205376	0.547623	0.516459	0.220385	0.271883	0.226446	0.215062	0.523088	0.111065	0.0554098	0.0490976	0.042821	0.0192288	0.0247153	0.0208296	0.0271665	0.0248	0.0695779	0.0351069	0.0531935	0.0370708	0.0377361	0.086619
rs314376625	SEMA3D	396332	1	8192426	intron-variant	ss538069225	AX-75533423	A/C	0.802438	0.257384	0.198259	0.764483	0.627491	0.394864	0.688514	0.168171	0.966298	0.802416	0.736189	0.966727	0.0325603	0.0669093	0.0946713	0.515066	0.218533	0.239537	0.511702	0.194612	0.683483	0.894209	0.233798	0.284533	0.51516	0.878323	0.981475	0.982474	0.980287	0.681893	0.647511	0.745314	0.678474	0.534033	0.523794	0.77141	0.45814	0.610421	0.543155	0.528045	0.66321
rs313946297	SEMA3D	396332	1	8199758	intron-variant	ss537911260	AX-75533579	C/T	0.254153	0.0319349	0.787008	0.643419	0.776434	0.503839	0.727681	0.107097	0.590249	0.626698	0.40433	0.882065	0.158347	0.434812	0.026669	0.828553	0.148701	0.0199358	0.824171	0.427147	0.598198	0.352895	0.735802	0.348986	0.345101	0.739876	0.312945	0.30039	0.28406	0.15291	0.0875705	0.0963129	0.110171	0.114385	0.09489	0.292065	0.187945	0.27427	0.231773	0.235314	0.311508
rs314961187	SEMA3D	396332	1	8200633	intron-variant	ss538178038	AX-75533595	C/T	0.57236	0.564594	0.054261	0.329349	0.366411	0.289021	0.359074	0.697295	0.377487	0.710902	0.00648605	0.810453	0.0809776	0.0687128	0.684555	0.938412	0.526008	0.457716	0.938502	0.124184	0.711659	0.073353	0.565869	0.939982	0.472176	0.937856	0.0407002	0.0263139	0.0281285	0.0259156	0.014056	0.0107686	0.0235972	0.0641998	0.0431707	0.0812877	0.168293	0.150011	0.137042	0.143371	0.12349
rs13825422	SEMA3D	396332	1	8205229	intron-variant	ss538214560	AX-75533697	A/G	0.132955	0.563321	0.819599	0.716977	0.450284	0.0217991	0.14596	0.932983	0.779467	0.428452	0.562957	0.599384	0.455489	0.836904	0.608245	0.982024	0.639138	0.48435	0.982146	0.849061	0.93214	0.162364	0.646629	0.778092	0.245457	0.488436	0.426801	0.353525	0.306432	0.250612	0.328883	0.209756	0.269802	0.250153	0.229435	0.307455	0.20662	0.32103	0.407674	0.426449	0.431711
rs315204474	SEMA3D	396332	1	8206178	intron-variant	ss538221330	AX-80780669	A/T	0.595792	0.362326	0.25015	0.985705	0.579827	0.149826	0.399402	0.235238	0.5372	0.887575	0.629729	0.716088	0.0311011	0.0926346	0.120349	0.745673	0.423787	0.196527	0.74133	0.267447	0.454244	0.834871	0.528623	0.375159	0.271853	0.871924	0.770806	0.825541	0.783709	0.550448	0.632624	0.678416	0.588571	0.470748	0.502836	0.622972	0.342424	0.462019	0.503429	0.495696	0.584077
rs314762716	SEMA3D	396332	1	8210093	intron-variant	ss537967367	AX-75533804	A/G	0.078206	0.736002	0.575525	0.818682	0.815967	0.00824429	0.0962817	0.679269	0.32827	0.614092	0.340053	0.712731	0.792144	0.955412	0.609646	0.877784	0.71444	0.432455	0.877876	0.933879	0.617294	0.310784	0.523837	0.904811	0.325352	0.384907	0.499441	0.426469	0.375612	0.307004	0.400321	0.265902	0.34054	0.314009	0.281759	0.369941	0.250122	0.38096	0.473606	0.48619	0.487887
rs314684667	SEMA3D	396332	1	8211226	intron-variant	ss537919639	AX-80946936	A/T	0.873957	0.41094	0.117165	0.955443	0.434836	0.426173	0.269052	0.0436354	0.799388	0.696583	0.451233	0.912772	0.0280721	0.0278793	0.0356375	0.5896	0.174313	0.0929216	0.585727	0.0796636	0.979472	0.500124	0.336785	0.0854369	0.377624	0.823279	0.463472	0.458857	0.506459	0.703461	0.796048	0.732735	0.84694	0.985251	0.998409	0.684326	0.94073	0.829844	0.847926	0.817909	0.632251
rs14790092	SEMA3D	396332	1	8216051	intron-variant	ss538156858	AX-75533925	C/T	0.353826	0.0745088	0.82693	0.857773	0.944761	0.376911	0.876295	0.20426	0.221688	0.978785	0.154162	0.856273	0.140592	0.337033	0.0434333	0.813009	0.225008	0.0382342	0.808279	0.72367	0.294364	0.481702	0.761362	0.66568	0.479711	0.65597	0.105516	0.0982379	0.0872144	0.0376078	0.0249181	0.0270037	0.0281981	0.0301251	0.0248905	0.0813575	0.0478333	0.0760794	0.0845487	0.0906301	0.117596
rs313239475	SEMA3D	396332	1	8217500	intron-variant	ss538058905	AX-75533949	A/G	0.218819	0.744799	0.653346	0.146445	0.880442	0.242812	0.149929	0.687742	0.341859	0.22993	0.9707	0.477681	0.94048	0.840687	0.161617	0.338482	0.708502	0.0268143	0.341371	0.793114	0.28183	0.287127	0.0707141	0.265272	0.365851	0.0933812	0.946677	0.854658	0.867971	0.831827	0.657069	0.788888	0.778182	0.792656	0.686506	0.843796	0.860606	0.981742	0.950534	0.981303	0.913228
rs314566954	SEMA3D	396332	1	8217724	intron-variant	ss538046551	AX-75533957	C/T	0.591635	0.821969	0.672235	0.431311	0.583621	0.249713	0.116012	0.0419618	0.553524	0.166181	0.469011	0.41569	0.862348	0.494534	0.368882	0.862029	0.325484	0.316681	0.86198	0.894361	0.760674	0.324388	0.283351	0.0646676	0.454101	0.74209	0.131501	0.173717	0.171421	0.154855	0.246092	0.155711	0.211146	0.191267	0.167877	0.222653	0.120772	0.187719	0.219703	0.205504	0.139011
rs13825416	SEMA3D	396332	1	8218672	intron-variant	ss537865104	AX-75533980	C/T	0.199252	0.745202	0.53201	0.128214	0.894382	0.276517	0.215794	0.599619	0.368287	0.233622	0.937752	0.506467	0.904362	0.854625	0.190043	0.295412	0.800788	0.0297447	0.298062	0.741797	0.261593	0.248295	0.0468232	0.214354	0.412851	0.0985456	0.920439	0.82516	0.836005	0.863763	0.688903	0.822136	0.81258	0.827223	0.719267	0.87874	0.890228	0.995432	0.966992	0.992534	0.909381
rs315086270	SEMA3D	396332	1	8220899	intron-variant	ss538194212	AX-75534016	G/T	0.487316	0.458168	0.388639	0.407799	0.519536	0.860312	0.542398	0.831169	0.900107	0.697704	0.788913	0.605685	0.110961	0.0651225	0.189836	0.552658	0.526396	0.455688	0.54874	0.34309	0.756411	0.504112	0.787454	0.971531	0.703453	0.761272	0.613136	0.822059	0.813499	0.624905	0.744894	0.774042	0.668918	0.52591	0.549636	0.775837	0.339893	0.512515	0.562554	0.539221	0.520274
rs15188169	SEMA3D	396332	1	8224970	intron-variant	ss537855948	AX-75534096	A/G	0.826725	0.740245	0.470809	0.861988	0.576362	0.239197	0.913655	0.814807	0.846403	0.437724	0.39339	0.506784	0.0860628	0.108624	0.337269	0.725742	0.830402	0.33163	0.729781	0.255707	0.735717	0.60689	0.200172	0.634484	0.291247	0.453896	0.402571	0.471157	0.543345	0.592626	0.652987	0.652135	0.767592	0.889575	0.901049	0.861426	0.893728	0.855538	0.786726	0.750154	0.543927
rs317936821	SEMA3D	396332	1	8226971	intron-variant	ss537728812	AX-75534135	A/G	0.0234446	0.27168	0.125513	0.777022	0.905133	0.367231	0.152931	0.392617	0.725616	0.123501	0.0630209	0.387354	0.269992	0.063807	0.166835	0.820232	0.529417	0.182535	0.824863	0.182658	0.195392	0.014161	0.0129017	0.0528972	0.90343	0.164008	0.0515861	0.0597461	0.0665359	0.0564834	0.0849844	0.0514874	0.105144	0.129317	0.114508	0.148439	0.214966	0.166632	0.169	0.157367	0.0820523
rs313798673	SEMA3D	396332	1	8229382	intron-variant	ss538059360	AX-75534183	A/G	0.521521	0.409247	0.568337	0.954434	0.892724	0.720618	0.93919	0.802644	0.709373	0.980292	0.862346	0.922521	0.0778521	0.0468163	0.176844	0.312804	0.340181	0.646964	0.309975	0.33459	0.526107	0.746081	0.816821	0.996765	0.219864	0.920439	0.594212	0.618496	0.599454	0.694723	0.727148	0.749848	0.560029	0.486712	0.566159	0.699062	0.28973	0.42598	0.465451	0.448804	0.532126
rs80674689	SEMA3D	396332	1	8229821	intron-variant	ss538216452	AX-75534195	A/G	0.91823	0.411273	0.419479	0.966277	0.704424	0.427681	0.729854	0.314465	0.979094	0.460816	0.269695	0.635347	0.740211	0.826249	0.667505	0.104479	0.34188	0.597142	0.104464	0.553654	0.0779174	0.248413	0.0746706	0.110766	0.831783	0.409233	0.0373527	0.0593227	0.0738867	0.111735	0.144146	0.149706	0.131652	0.142011	0.179673	0.228325	0.138499	0.109567	0.100923	0.0835932	0.0517978
rs13825410	SEMA3D	396332	1	8232552	intron-variant	ss537858381	AX-75534253	A/G	0.0971217	0.839685	0.621814	0.441292	0.328209	0.234855	0.548205	0.629486	0.712337	0.072112	0.961165	0.212182	0.942441	0.84314	0.0826113	0.500207	0.422414	0.0209256	0.504618	0.683749	0.402612	0.270786	0.0203436	0.212687	0.91693	0.145252	0.996677	0.88035	0.850809	0.850499	0.544318	0.682069	0.577066	0.673692	0.615955	0.667991	0.714809	0.796177	0.748493	0.78913	0.951877
rs312332423	SEMA3D	396332	1	8235600	intron-variant	ss537756305	AX-75534319	G/T	0.91823	0.411273	0.419479	0.966277	0.704424	0.427681	0.749065	0.314465	0.979094	0.460816	0.257292	0.635347	0.740211	0.826249	0.667505	0.104479	0.34188	0.597142	0.104464	0.553654	0.0779174	0.248413	0.0746706	0.110766	0.835624	0.409233	0.0364024	0.0579447	0.0723703	0.109519	0.141768	0.147164	0.129751	0.140195	0.177541	0.22585	0.136583	0.108186	0.099573	0.0822996	0.0510743
rs317142250	SEMA3D	396332	1	8238070	intron-variant	ss537841196	AX-75534366	C/T	0.521521	0.409247	0.568337	0.954434	0.892724	0.720618	0.860919	0.802644	0.709373	0.980292	0.881888	0.922521	0.0778521	0.0468163	0.176844	0.312804	0.340181	0.646964	0.309975	0.33459	0.526107	0.746081	0.816821	0.996765	0.203003	0.920439	0.670258	0.695745	0.673635	0.769182	0.798826	0.819401	0.620792	0.542253	0.622849	0.765288	0.333088	0.484517	0.524822	0.505197	0.59198
rs312532311	SEMA3D	396332	1	8239851	intron-variant	ss537920694	AX-80860993	C/G	0.0971217	0.839685	0.621814	0.441292	0.328209	0.234855	0.547893	0.629486	0.712337	0.072112	0.961165	0.212182	0.942441	0.84314	0.0826113	0.500207	0.422414	0.0209256	0.504618	0.683749	0.402612	0.270786	0.0203436	0.212687	0.91693	0.145252	0.996677	0.88035	0.850809	0.850499	0.544318	0.682069	0.577066	0.673692	0.615955	0.667991	0.714809	0.796177	0.748493	0.78913	0.951877
rs313248945	SEMA3D	396332	1	8240684	intron-variant	ss537833403	AX-75534431	A/G	0.133971	0.448032	0.748483	0.122536	0.945875	0.962181	0.45724	0.34339	0.2035	0.366469	0.742023	0.526452	0.986799	0.466154	0.943709	0.149188	0.232052	0.567504	0.150514	0.58313	0.273591	0.224628	0.0776093	0.84569	0.838279	0.121704	0.351047	0.196793	0.19402	0.307278	0.326838	0.318503	0.328165	0.362473	0.38324	0.359768	0.512213	0.394854	0.484195	0.548134	0.603099
rs316370546	SEMA3D	396332	1	8242874	intron-variant	ss537854502	AX-75534475	G/T	0.000424215	0.0084262	0.25187	0.332887	0.604503	0.0300602	0.94873	0.483067	0.882429	0.197491	0.71353	0.419705	0.814561	0.307293	0.363402	0.511746	0.994916	0.360072	0.514993	0.807255	0.396047	0.0490005	0.00850468	0.429783	0.826662	0.0963721	0.243625	0.248537	0.234319	0.171577	0.207371	0.123777	0.201515	0.196775	0.147196	0.286545	0.371238	0.324833	0.37728	0.417254	0.337521
rs317424576	SEMA3D	396332	1	8245116	intron-variant	ss537907655	AX-80939957	C/G	0.0234446	0.27168	0.125513	0.777022	0.905133	0.367231	0.16769	0.392617	0.725616	0.123501	0.0369413	0.387354	0.269992	0.063807	0.166835	0.820232	0.529417	0.182535	0.824863	0.182658	0.195392	0.014161	0.0129017	0.0528972	0.709646	0.164008	0.0275604	0.0309401	0.0335671	0.0285273	0.0451204	0.0243683	0.0515909	0.063153	0.0548766	0.0739839	0.115087	0.0881329	0.0925134	0.0887744	0.0449895
rs313701622	SEMA3D	396332	1	8247047	intron-variant	ss537946048	AX-75534575	C/T	0.16937	0.0883342	0.762576	0.164717	0.924746	0.150134	0.705606	0.0177864	0.952453	0.923093	0.902775	0.76036	0.259409	0.297499	0.871156	0.674537	0.787231	0.85127	0.674566	0.732841	0.575814	0.844318	0.872972	0.175347	0.564153	0.400693	0.804925	0.905834	0.96121	0.988401	0.854254	0.880733	0.879725	0.898986	0.903782	0.909995	0.937271	0.958299	0.947738	0.887107	0.809384
rs314200165	SEMA3D	396332	1	8247964	intron-variant	ss538152430	AX-75534593	C/T	0.261002	0.526562	0.776144	0.44698	0.910138	0.956922	0.518559	0.932216	0.368247	0.506213	0.479862	0.742601	0.432818	0.152887	0.291058	0.959326	0.80546	0.428988	0.954915	0.461494	0.752214	0.444853	0.250996	0.863291	0.682097	0.661198	0.96543	0.710544	0.695993	0.856396	0.934851	0.878148	0.987803	0.987539	0.945516	0.797035	0.91549	0.995607	0.871998	0.787561	0.743277
rs15188134	SEMA3D	396332	1	8253828	intron-variant	ss537822990	AX-80764780	C/G	0.213468	0.26805	0.948346	0.276208	0.508221	0.923959	0.773275	0.0431478	0.6418	0.875047	0.467099	0.986204	0.483259	0.651367	0.0952539	0.0561477	0.0286637	0.490519	0.0561444	0.607984	0.0809858	0.184799	0.269437	0.553069	0.659037	0.0767675	0.30558	0.255246	0.270299	0.358966	0.250388	0.291839	0.247155	0.259535	0.325646	0.529527	0.428202	0.354644	0.263884	0.257391	0.317014
rs13825398	SEMA3D	396332	1	8258467	intron-variant	ss537881457	AX-75534818	C/T	0.014508	0.490851	0.639558	0.534394	0.144835	0.0737851	0.55284	0.77299	0.637002	0.143353	0.107928	0.331119	0.999959	0.820679	0.265472	0.377104	0.808811	0.0966009	0.380445	0.631113	0.954592	0.317283	0.0052208	0.326491	0.954246	0.201211	0.593042	0.47421	0.475776	0.536076	0.305224	0.461359	0.395264	0.545952	0.587572	0.431984	0.549882	0.572109	0.475792	0.46509	0.594596
rs316060204	SEMA3D	396332	1	8261316	intron-variant	ss538109291	AX-75534877	A/G	0.470051	0.622896	0.890042	0.167153	0.387881	0.526763	0.518309	0.00765911	0.605775	0.979166	0.611979	0.71796	0.458405	0.306761	0.0688762	0.0392581	0.0195374	0.513847	0.039253	0.54225	0.275238	0.592592	0.294674	0.19929	0.532439	0.0624477	0.947997	0.933829	0.958728	0.872136	0.957768	0.957987	0.929527	0.967127	0.913273	0.661937	0.802742	0.888864	0.970894	0.973696	0.919308
rs13825396	SEMA3D	396332	1	8263356	intron-variant	ss537981203	AX-75534911	C/T	0.0913906	0.407685	0.708884	0.110418	0.575209	0.0135999	0.159231	0.342531	0.699664	0.182063	0.839617	0.497253	0.69755	0.904862	0.00912495	0.634848	0.0563815	0.0157067	0.631159	0.673766	0.413932	0.653884	0.299737	0.185499	0.561037	0.336759	0.95164	0.870291	0.817118	0.920044	0.911458	0.912527	0.988712	0.944678	0.95099	0.661075	0.867174	0.822828	0.95521	0.982677	0.887347
rs13825393	SEMA3D	396332	1	8266307	intron-variant	ss538186440	AX-75534977	C/T	0.171581	0.59752	0.946843	0.240436	0.767353	0.0452544	0.518988	0.655606	0.987623	0.0632077	0.940647	0.180899	0.756168	0.872659	0.00985171	0.480063	0.0355603	0.0249151	0.47673	0.719425	0.881841	0.712434	0.297447	0.383886	0.852534	0.454055	0.513731	0.452452	0.490847	0.623694	0.396626	0.527357	0.415109	0.502126	0.540035	0.749386	0.577412	0.572774	0.44061	0.41499	0.583944
rs13825391	SEMA3D	396332	1	8269604	intron-variant	ss538046962	AX-75535046	C/T	0.300745	0.938092	0.856639	0.390143	0.893195	0.0663837	0.473326	0.923993	0.860075	0.0772425	0.85954	0.18501	0.874169	0.963658	0.00725427	0.602374	0.04242	0.0133238	0.59859	0.607049	0.904146	0.577612	0.45986	0.624178	0.943576	0.466724	0.497532	0.443159	0.480562	0.598432	0.368316	0.496126	0.393883	0.470463	0.498205	0.713151	0.557665	0.553106	0.416017	0.392808	0.559692
rs13825388	SEMA3D	396332	1	8271413	intron-variant	ss537743314	AX-75535090	C/T	0.170714	0.628625	0.697378	0.0869063	0.727177	0.0467912	0.274959	0.695534	0.674032	0.184443	0.921908	0.411083	0.659755	0.865906	0.0166555	0.759807	0.0906404	0.0182205	0.755903	0.788508	0.754433	0.977776	0.324242	0.397507	0.420685	0.256079	0.565455	0.653514	0.702348	0.592388	0.44995	0.583698	0.534298	0.561509	0.555705	0.838269	0.648197	0.678062	0.554353	0.5217	0.594407
rs80689744	SEMA3D	396332	1	8274784	intron-variant	ss538017335	AX-75535169	C/T	0.0718946	0.336075	0.960999	0.326736	0.743516	0.017105	0.328885	0.376377	0.991555	0.0628883	0.943829	0.243808	0.715381	0.858162	0.006765	0.509097	0.0305754	0.0189121	0.50566	0.669663	0.731157	0.931164	0.33612	0.164411	0.87026	0.439312	0.82728	0.726142	0.772171	0.954533	0.605917	0.78756	0.621151	0.773668	0.803363	0.992379	0.888342	0.90094	0.751294	0.73168	0.956874
rs80753275	SEMA3D	396332	1	8276486	intron-variant	ss537737854	AX-75535206	C/T	0.213468	0.26805	0.948346	0.276208	0.508221	0.923959	0.694337	0.0431478	0.6418	0.875047	0.440367	0.986204	0.483259	0.651367	0.0952539	0.0561477	0.0286637	0.490519	0.0561444	0.607984	0.0809858	0.184799	0.269437	0.553069	0.638945	0.0767675	0.329209	0.274889	0.289318	0.380825	0.26642	0.309265	0.259748	0.271635	0.340472	0.549418	0.445097	0.370079	0.277613	0.272199	0.333439
rs317879205	SEMA3D	396332	1	8278249	intron-variant	ss538110320	AX-75535233	C/T	0.0537593	0.375296	0.955802	0.688017	0.953056	0.413749	0.365033	0.353809	0.659564	0.033064	0.107238	0.105555	0.859185	0.200262	0.331033	0.373257	0.922626	0.185564	0.376005	0.471905	0.251598	0.0579276	0.130138	0.665331	0.887848	0.0555226	0.0457649	0.0294495	0.0268361	0.0195867	0.0363842	0.02754	0.0519851	0.049461	0.0541769	0.0578899	0.0744918	0.0799636	0.0947681	0.109871	0.0776572
rs13825380	SEMA3D	396332	1	8281801	intron-variant	ss537716129	AX-75535308	C/T	0.108635	0.614286	0.916117	0.53462	0.926206	0.648025	0.468322	0.163991	0.698356	0.0259584	0.132078	0.062227	0.89929	0.386692	0.411452	0.29954	0.800504	0.186619	0.301906	0.524802	0.445785	0.161821	0.132928	0.983159	0.807481	0.0456693	0.171513	0.115633	0.107247	0.0875155	0.146398	0.120073	0.189183	0.186516	0.202116	0.206649	0.243636	0.263291	0.303664	0.345068	0.269145
rs316296062	SEMA3D	396332	1	8286277	intron-variant	ss537840095	AX-75535386	A/G	0.0443811	0.458734	0.852379	0.126331	0.35624	0.0839844	0.930653	0.230821	0.50504	0.122666	0.742192	0.248409	0.562435	0.484402	0.0614951	0.380563	0.425823	0.0146391	0.38356	0.839001	0.653103	0.835873	0.14849	0.830747	0.779744	0.0519391	0.996281	0.986374	0.956006	0.959004	0.768342	0.888258	0.790406	0.912241	0.830672	0.85939	0.888524	0.951081	0.881475	0.863007	0.995648
rs315388117	SEMA3D	396332	1	8286637	intron-variant	ss538078915	AX-75535395	C/T	0.213468	0.26805	0.948346	0.276208	0.508221	0.923959	0.708506	0.0431478	0.6418	0.875047	0.467099	0.986204	0.483259	0.651367	0.0952539	0.0561477	0.0286637	0.490519	0.0561444	0.607984	0.0809858	0.184799	0.269437	0.553069	0.625705	0.0767675	0.339755	0.284506	0.299213	0.392477	0.275131	0.318233	0.267294	0.278257	0.347961	0.559548	0.455483	0.379077	0.284807	0.278927	0.339805
rs313947805	SEMA3D	396332	1	8292325	intron-variant	ss538249642	AX-75535503	C/T	0.174531	0.647995	0.93066	0.24793	0.507964	0.0672826	0.747354	0.735441	0.900409	0.0832968	0.932421	0.243552	0.724565	0.646668	0.00383507	0.537058	0.0187169	0.00854305	0.533633	0.609282	0.646403	0.47443	0.376135	0.385984	0.830856	0.374162	0.486469	0.441975	0.475817	0.572742	0.294614	0.400413	0.288041	0.373066	0.385377	0.547633	0.480129	0.471923	0.35548	0.339542	0.495588
rs312816980	SEMA3D	396332	1	8293386	intron-variant	ss537883382	AX-75535523	A/C	0.438389	0.724406	0.89797	0.675851	0.759795	0.789795	0.721931	0.0341147	0.509482	0.673821	0.58277	0.881686	0.794733	0.791184	0.118774	0.0375855	0.0243067	0.660283	0.0375876	0.650163	0.205784	0.192626	0.518535	0.317767	0.915284	0.178663	0.29848	0.241266	0.250759	0.347463	0.255843	0.291425	0.234258	0.244923	0.319418	0.496059	0.376575	0.316437	0.247507	0.245577	0.308359
rs313410452	SEMA3D	396332	1	8293409	intron-variant	ss537927298	AX-75535524	C/T	0.0309765	0.276481	0.794473	0.246565	0.836083	0.0200911	0.972487	0.470208	0.899985	0.0799698	0.276058	0.278894	0.347612	0.918502	0.0590491	0.87992	0.24009	0.0694955	0.875948	0.700991	0.774758	0.465871	0.105892	0.370952	0.24943	0.289061	0.817663	0.933184	0.998416	0.998162	0.754909	0.907231	0.805167	0.963503	0.99911	0.868183	0.938906	0.952418	0.759945	0.682699	0.710767
rs316208782	SEMA3D	396332	1	8295320	intron-variant	ss537720716	AX-75535570	C/T	0.335769	0.721888	0.516691	0.191841	0.533451	0.566383	0.215835	0.728119	0.620101	0.468556	0.039906	0.722115	0.664383	0.886305	0.200243	0.923888	0.54155	0.229961	0.919593	0.906978	0.875142	0.891433	0.388583	0.870484	0.928903	0.717448	0.169952	0.246511	0.260692	0.183744	0.123085	0.127975	0.132479	0.195942	0.193979	0.33333	0.25474	0.280927	0.210103	0.180228	0.152353
rs312293845	SEMA3D	396332	1	8295514	intron-variant	ss538278698	AX-75535574	A/G	0.558956	0.623363	0.2027	0.508102	0.688233	0.914534	0.123614	0.809901	0.363096	0.242554	0.0208331	0.235169	0.462594	0.433738	0.0719304	0.657044	0.0832166	0.0924541	0.657087	0.0606475	0.804527	0.383081	0.228881	0.523928	0.390713	0.889988	0.72629	0.758779	0.792315	0.999806	0.99851	0.993155	0.999885	0.829387	0.715136	0.917454	0.837175	0.929192	0.812482	0.715384	0.629232
rs315400978	SEMA3D	396332	1	8295753	intron-variant	ss537889898	AX-75535578	A/G	0.00254612	0.0471319	0.60092	0.19336	0.963818	0.104992	0.668583	0.450849	0.83828	0.114626	0.653772	0.286922	0.756639	0.337444	0.556646	0.291073	0.598818	0.340091	0.293326	0.945868	0.228666	0.0203671	0.0124641	0.580767	0.288127	0.0310108	0.154009	0.0813689	0.0706285	0.0866811	0.0977309	0.0654082	0.0937229	0.0935983	0.0850631	0.123936	0.167965	0.178812	0.226959	0.279393	0.291537
rs314129336	SEMA3D	396332	1	8297013	intron-variant	ss538037815	AX-75535600	A/G	0.661849	0.986036	0.899533	0.07434	0.843596	0.596128	0.935186	0.636701	0.853723	0.893275	0.486563	0.786135	0.866082	0.863308	0.0158128	0.71379	0.0891228	0.0225998	0.709704	0.343481	0.80933	0.395888	0.970445	0.551398	0.812341	0.705648	0.229412	0.303836	0.298969	0.150683	0.097139	0.098348	0.0985178	0.107699	0.0833671	0.232157	0.151994	0.254464	0.228586	0.235369	0.240342
rs316292895	SEMA3D	396332	1	8297859	intron-variant	ss538206065	AX-75535616	A/G	0.00623131	0.0842055	0.810996	0.371669	0.442643	0.249348	0.72278	0.203074	0.53746	0.0329401	0.755566	0.0822711	0.820922	0.481237	0.626003	0.375612	0.668158	0.461183	0.378326	0.99836	0.558185	0.110916	0.0110492	0.93218	0.619558	0.0476258	0.335095	0.272605	0.251143	0.180575	0.244297	0.182687	0.272661	0.242085	0.20166	0.321444	0.36953	0.41782	0.505809	0.586839	0.512837
rs312808326	SEMA3D	396332	1	8298038	intron-variant	ss537867166	AX-75535619	C/T	0.0103077	0.068769	0.7229	0.420152	0.9457	0.0316801	0.230784	0.281562	0.416937	0.214409	0.164729	0.345394	0.20143	0.703432	0.671376	0.157318	0.344723	0.733431	0.157343	0.446767	0.0566967	0.0350689	0.0459559	0.589765	0.0726123	0.0183475	0.0637529	0.0574794	0.0511995	0.0418481	0.0391954	0.0265722	0.0324091	0.0304315	0.0340233	0.0908773	0.0588475	0.0786672	0.0753913	0.0799796	0.0713045
rs315610442	SEMA3D	396332	1	8300658	intron-variant	ss537882912	AX-75535672	C/T	0.0119966	0.0432433	0.342896	0.293952	0.956416	0.0108829	0.328272	0.365765	0.140654	0.767453	0.107196	0.97323	0.643143	0.578435	0.735572	0.297816	0.908047	0.382818	0.297815	0.708145	0.22229	0.208163	0.0986846	0.433844	0.333147	0.0477583	0.0785171	0.0823684	0.0727796	0.0793814	0.065209	0.0352605	0.0397295	0.0469038	0.0494252	0.139794	0.108456	0.104364	0.100716	0.101806	0.090146
rs313700381	SEMA3D	396332	1	8300786	intron-variant	ss538056378	AX-75535677	A/G	0.0504221	0.0122127	0.149027	0.554938	0.650831	0.489737	0.688845	0.652794	0.48001	0.779047	0.584179	0.650182	0.174929	0.027838	0.566231	0.711317	0.633464	0.178966	0.711303	0.818214	0.863696	0.0597755	0.106392	0.388226	0.628863	0.986599	0.0228148	0.0210642	0.0197843	0.0121105	0.00537978	0.00282435	0.00545297	0.00903955	0.00309799	0.0180803	0.0370422	0.037783	0.04492	0.0560026	0.0628169
rs315163213	SEMA3D	396332	1	8303952	intron-variant	ss538281613	AX-75535748	C/T	0.66022	0.408975	0.168853	0.481052	0.79954	0.189251	0.956542	0.904047	0.100003	0.0645249	0.472814	0.0740164	0.14923	0.662029	0.114858	0.614141	0.107709	0.216824	0.61426	0.514422	0.284074	0.167288	0.742922	0.543208	0.259854	0.745452	0.762899	0.857931	0.838677	0.976337	0.925475	0.751888	0.723359	0.882862	0.860729	0.996536	0.915569	0.870545	0.876265	0.848949	0.842632
rs312785111	SEMA3D	396332	1	8305314	intron-variant	ss538236207	AX-75535779	G/T	0.796342	0.375501	0.607841	0.411372	0.380617	0.860759	0.360466	0.801303	0.937329	0.679352	0.327671	0.787954	0.593697	0.726417	0.0223042	0.702998	0.0936221	0.0307591	0.698924	0.377975	0.209697	0.0917985	0.772265	0.799529	0.216818	0.92237	0.0783812	0.0785655	0.0795675	0.064421	0.0250521	0.0257067	0.0227441	0.030145	0.0238569	0.0717509	0.0493621	0.0772812	0.0571868	0.0554963	0.0750706
rs316928754	SEMA3D	396332	1	8306427	intron-variant	ss537778476	AX-75535802	C/T	0.84614	0.357628	0.823229	0.13271	0.901703	0.997812	0.70452	0.835466	0.704332	0.98345	0.486663	0.891448	0.703752	0.64394	0.0314632	0.991215	0.189822	0.019563	0.995401	0.403834	0.36638	0.196846	0.811138	0.837105	0.597211	0.798505	0.0808767	0.129444	0.1334	0.0514793	0.028602	0.030235	0.0342911	0.0344411	0.0226043	0.082715	0.0539138	0.0924925	0.0743089	0.0717428	0.0693161
rs312512315	SEMA3D	396332	1	8307326	intron-variant	ss538126260	AX-75535828	A/G	0.84614	0.357628	0.823229	0.13271	0.901703	0.997812	0.770488	0.835466	0.704332	0.98345	0.481991	0.891448	0.703752	0.64394	0.0314632	0.991215	0.189822	0.019563	0.995401	0.403834	0.36638	0.196846	0.811138	0.837105	0.577998	0.798505	0.098088	0.155419	0.16039	0.0645791	0.0363889	0.038472	0.0438343	0.0444703	0.0299429	0.104937	0.0701831	0.115236	0.0923359	0.0888081	0.0850262
rs13825367	SEMA3D	396332	1	8308116	intron-variant	ss537740466	AX-75535845	C/T	0.796342	0.375501	0.607841	0.411372	0.380617	0.860759	0.325793	0.801303	0.937329	0.679352	0.412327	0.787954	0.593697	0.726417	0.0223042	0.702998	0.0936221	0.0307591	0.698924	0.377975	0.209697	0.0917985	0.772265	0.799529	0.171338	0.92237	0.0534652	0.0526366	0.053155	0.042622	0.015754	0.0162741	0.014029	0.0187818	0.014669	0.0469704	0.0314402	0.0526482	0.039619	0.0390957	0.0549439
rs314716146	SEMA3D	396332	1	8314000	intron-variant	ss538161748	AX-75535943	G/T	0.222365	0.560952	0.827858	0.393932	0.943215	0.834243	0.524521	0.908256	0.54456	0.456366	0.448473	0.71115	0.308001	0.140471	0.235636	0.993898	0.769135	0.352099	0.998372	0.469736	0.881593	0.457437	0.256047	0.734333	0.688296	0.584291	0.83981	0.900023	0.885405	0.965462	0.887426	0.95095	0.845289	0.834666	0.920191	0.935093	0.765152	0.83651	0.710737	0.631972	0.59024
rs313714522	SEMA3D	396332	1	8316905	intron-variant	ss538206336	AX-75535998	C/T	0.172434	0.0855447	0.00718605	0.252153	0.999613	0.044006	0.873418	0.568564	0.504526	0.0333995	0.299612	0.0386838	0.26578	0.753689	0.21936	0.39398	0.138615	0.545319	0.39403	0.623288	0.412515	0.626583	0.703716	0.366831	0.286579	0.403857	0.54132	0.399952	0.381064	0.280083	0.339875	0.453333	0.436547	0.311263	0.347326	0.245769	0.201565	0.363192	0.400832	0.474924	0.521465
rs316537573	SEMA3D	396332	1	8317220	intron-variant	ss537725285	AX-80840355	C/G	0.0103077	0.068769	0.7229	0.420152	0.9457	0.0316801	0.260143	0.281562	0.416937	0.214409	0.170448	0.345394	0.20143	0.703432	0.671376	0.157318	0.344723	0.733431	0.157343	0.446767	0.0566967	0.0350689	0.0459559	0.589765	0.0728152	0.0183475	0.0629209	0.0571286	0.0510043	0.0419479	0.0393663	0.0266156	0.0321581	0.0298452	0.0330787	0.0884419	0.0568274	0.0758692	0.0721252	0.076394	0.0677768
rs313588015	SEMA3D	396332	1	8317390	intron-variant	ss538151468	AX-75536008	A/G	0.0418851	0.213148	0.993443	0.628633	0.552662	0.0900284	0.680579	0.22821	0.679957	0.177561	0.236119	0.244251	0.471481	0.923098	0.720484	0.256504	0.469387	0.845875	0.256554	0.495427	0.241491	0.0946867	0.136622	0.908252	0.602421	0.125808	0.0377222	0.0540213	0.0474745	0.018186	0.0244025	0.0160399	0.0230972	0.0184008	0.0192401	0.0652751	0.0366412	0.0589942	0.0630133	0.0686681	0.0484269
rs13787544	SEMA3D	396332	1	8317793	intron-variant	ss537796240	AX-80984532	C/G	0.0103077	0.068769	0.7229	0.420152	0.9457	0.0316801	0.25925	0.281562	0.416937	0.214409	0.169688	0.345394	0.20143	0.703432	0.671376	0.157318	0.344723	0.733431	0.157343	0.446767	0.0566967	0.0350689	0.0459559	0.589765	0.0758322	0.0183475	0.0616412	0.0558711	0.0498509	0.04095	0.038422	0.0259622	0.0315016	0.0292842	0.0324952	0.087118	0.0559656	0.0747579	0.071259	0.0756457	0.0670718
rs13787494	SEMA3A	395825	1	8678289	upstream-variant-2KB	ss538071727	AX-75543695	A/G	0.0205244	0.208433	0.891073	0.0466011	0.245306	0.061902	0.811323	0.294998	0.624139	0.07526	0.66056	0.188192	0.384044	0.414359	0.061701	0.500093	0.347259	0.02203	0.503584	0.853614	0.466334	0.866446	0.0826442	0.591073	0.330379	0.0296052	0.926295	0.937792	0.928723	0.920542	0.827881	0.91722	0.789287	0.893292	0.816714	0.835514	0.844695	0.930925	0.889193	0.881572	0.958026
rs313201451	SEMA3A	395825	1	8679198	upstream-variant-2KB	ss537773979	AX-75543714	A/G	0.367635	0.762475	0.639985	0.209325	0.271975	0.88337	0.428153	0.290446	0.856244	0.842926	0.875523	0.976786	0.903974	0.815406	0.238978	0.459869	0.780553	0.120697	0.463004	0.56469	0.709576	0.849033	0.657908	0.888784	0.628995	0.340186	0.930897	0.959246	0.933903	0.775947	0.641353	0.604501	0.603285	0.672866	0.533467	0.646861	0.607614	0.836546	0.862001	0.874395	0.916102
rs14789970	SEMA3A	395825	1	8682744	intron-variant	ss537728989	AX-80803713	C/G	0.0443811	0.458734	0.852379	0.126331	0.35624	0.0839844	0.865991	0.230821	0.50504	0.122666	0.594912	0.248409	0.562435	0.484402	0.0614951	0.380563	0.425823	0.0146391	0.38356	0.839001	0.653103	0.835873	0.14849	0.830747	0.518164	0.0519391	0.761366	0.742445	0.712478	0.727364	0.995147	0.881207	0.982616	0.889526	0.995491	0.9697	0.948017	0.885319	0.960218	0.987786	0.84158
rs312734547	SEMA3A	395825	1	8684416	intron-variant	ss537952301	AX-75543830	A/G	0.0429879	0.472764	0.793185	0.140723	0.495152	0.0532392	0.515346	0.300025	0.503065	0.0813344	0.633948	0.170718	0.623545	0.706888	0.110321	0.325458	0.622136	0.0244904	0.328202	0.956112	0.413242	0.630987	0.102776	0.763233	0.369875	0.0721416	0.981281	0.985302	0.951566	0.923449	0.819729	0.950359	0.862968	0.965098	0.852888	0.885301	0.89025	0.962518	0.893461	0.863564	0.987252
rs314106747	SEMA3A	395825	1	8686539	intron-variant	ss537850537	AX-75543877	A/G	0.0340247	0.457574	0.230396	0.0818352	0.88687	0.184481	0.105536	0.520946	0.930458	0.325474	0.0421785	0.631304	0.887569	0.91091	0.160456	0.207661	0.906005	0.0339314	0.207645	0.155534	0.638451	0.243397	0.134683	0.410914	0.560669	0.0451294	0.145208	0.077916	0.0721938	0.138622	0.201708	0.143028	0.180894	0.259065	0.311509	0.257479	0.348357	0.258353	0.327798	0.34816	0.282289
rs317995276	SEMA3A	395825	1	8690495	intron-variant	ss538277767	AX-75543966	A/G	0.0611638	0.262322	0.629517	0.955686	0.591941	0.00790036	0.0985186	0.554545	0.621301	0.10597	0.327875	0.273871	0.390214	0.969552	0.295293	0.925263	0.365202	0.294193	0.925164	0.667843	0.525494	0.206879	0.193021	0.24629	0.0952675	0.254318	0.173736	0.192572	0.163956	0.0961412	0.140937	0.0809881	0.120399	0.107843	0.0899084	0.129	0.108935	0.185233	0.241321	0.259301	0.188452
rs313856854	SEMA3A	395825	1	8693010	intron-variant	ss538240586	AX-75544024	A/G	0.158008	0.478329	0.236886	0.0585193	0.84831	0.94118	0.377806	0.558588	0.475896	0.761309	0.185535	0.970001	0.604557	0.578304	0.460816	0.325778	0.745118	0.26051	0.328079	0.113413	0.188329	0.234243	0.234277	0.559387	0.812594	0.206283	0.481029	0.338709	0.364947	0.60416	0.627341	0.616515	0.645622	0.799511	0.894954	0.732793	0.979627	0.646471	0.644063	0.629164	0.590807
rs313843495	SEMA3A	395825	1	8694550	intron-variant	ss538253412	AX-75544065	C/T	0.626115	0.884954	0.114747	0.617059	0.166881	0.0886027	0.547977	0.767973	0.103967	0.31265	0.311552	0.427724	0.253592	0.166517	0.473882	0.929711	0.390983	0.342256	0.933809	0.132564	0.18117	0.21482	0.859199	0.872662	0.351199	0.562352	0.709629	0.54699	0.61393	0.904549	0.691908	0.777617	0.729823	0.988435	0.984578	0.847943	0.872155	0.818039	0.735254	0.68651	0.760638
rs314437866	SEMA3A	395825	1	8697932	intron-variant	ss538190125	AX-75544152	G/T	0.0611638	0.262322	0.629517	0.955686	0.591941	0.00790036	0.0964249	0.554545	0.621301	0.10597	0.328168	0.273871	0.390214	0.969552	0.295293	0.925263	0.365202	0.294193	0.925164	0.667843	0.525494	0.206879	0.193021	0.24629	0.0936198	0.254318	0.174831	0.193637	0.164901	0.0967102	0.141438	0.0814352	0.120872	0.108332	0.0903947	0.129466	0.109564	0.186162	0.242851	0.261429	0.190823
rs313333838	SEMA3A	395825	1	8698451	intron-variant	ss537752655	AX-80924247	C/G	0.24608	0.644965	0.352659	0.0328597	0.698426	0.831021	0.595362	0.383596	0.723616	0.904069	0.136772	0.890721	0.652858	0.851121	0.46588	0.256933	0.740321	0.191231	0.25687	0.0991395	0.763921	0.736611	0.354963	0.706623	0.781315	0.131645	0.563691	0.359504	0.374083	0.681601	0.722526	0.721632	0.733534	0.926937	0.944149	0.877601	0.891021	0.807669	0.835749	0.843687	0.829342
rs13825218	SEMA3A	395825	1	8703160	intron-variant	ss537783018	AX-75544282	C/T	0.310674	0.535173	0.554282	0.0400643	0.0715702	0.947376	0.387163	0.22157	0.726921	0.691885	0.911315	0.847502	0.78057	0.369324	0.424365	0.381024	0.999284	0.184718	0.380919	0.616224	0.934682	0.38396	0.616465	0.976667	0.81827	0.144457	0.485345	0.526939	0.509861	0.385508	0.30205	0.269017	0.27438	0.309985	0.23004	0.299527	0.267112	0.411341	0.43087	0.429167	0.455121
rs13825214	SEMA3A	395825	1	8706095	intron-variant	ss537937725	AX-75544347	A/G	0.24608	0.644965	0.352659	0.0328597	0.698426	0.831021	0.578644	0.383596	0.723616	0.904069	0.162913	0.890721	0.652858	0.851121	0.46588	0.256933	0.740321	0.191231	0.25687	0.0991395	0.763921	0.736611	0.354963	0.706623	0.75876	0.131645	0.568445	0.363431	0.378251	0.688048	0.729267	0.727512	0.737671	0.928891	0.942884	0.876838	0.891055	0.804971	0.831837	0.838946	0.821966
rs315873034	SEMA3A	395825	1	8706554	intron-variant	ss538182317	AX-75544357	C/T	0.0611638	0.262322	0.629517	0.955686	0.591941	0.00790036	0.0943189	0.554545	0.621301	0.10597	0.328168	0.273871	0.390214	0.969552	0.295293	0.925263	0.365202	0.294193	0.925164	0.667843	0.525494	0.206879	0.193021	0.24629	0.0936198	0.254318	0.174831	0.193637	0.164901	0.0967102	0.141438	0.0814352	0.120872	0.108332	0.0903947	0.129466	0.109564	0.186162	0.242851	0.261429	0.190823
rs318178073	SEMA3A	395825	1	8708824	intron-variant	ss538188820	AX-75544415	C/T	0.0159767	0.138797	0.541942	0.148459	0.849847	0.0135805	0.273327	0.383652	0.989718	0.150006	0.0262971	0.25023	0.13527	0.455032	0.880829	0.241119	0.722474	0.412056	0.24113	0.634144	0.0359599	0.0995059	0.0514952	0.456933	0.0916113	0.0245129	0.0210697	0.0203557	0.0182753	0.0139505	0.0199661	0.01264	0.0153892	0.0155192	0.018479	0.0399305	0.0252402	0.0302863	0.0391667	0.0398525	0.0270072
rs13825213	SEMA3A	395825	1	8708988	intron-variant	ss538075917	AX-75544418	A/G	0.291937	0.355902	0.17806	0.675993	0.315146	0.023507	0.846241	0.841276	0.24539	0.143432	0.312885	0.25241	0.155802	0.469765	0.463943	0.61703	0.290777	0.55053	0.61698	0.0856813	0.979267	0.709348	0.703035	0.704153	0.181631	0.594937	0.731945	0.485111	0.529706	0.920698	0.731618	0.829539	0.739368	0.951144	0.903017	0.924877	0.826685	0.903619	0.874565	0.857893	0.989216
rs315445890	SEMA3A	395825	1	8711549	intron-variant	ss537970015	AX-75544471	C/T	0.463111	0.694819	0.307436	0.14127	0.822428	0.85708	0.460654	0.944924	0.881348	0.863313	0.407941	0.602739	0.287684	0.737879	0.062994	0.997969	0.33348	0.0701157	0.99789	0.0628728	0.281229	0.711781	0.785001	0.588797	0.531633	0.540161	0.895078	0.85331	0.856302	0.811732	0.735117	0.783052	0.696462	0.538101	0.498823	0.7689	0.483774	0.683436	0.64428	0.622103	0.643566
rs317750513	SEMA3A	395825	1	8715225	intron-variant	ss537937932	AX-75544574	A/G	0.0130014	0.134935	0.794829	0.0335871	0.135296	0.040606	0.675452	0.391868	0.436654	0.0949701	0.467969	0.278852	0.344427	0.33466	0.102514	0.393221	0.497015	0.0278912	0.39316	0.832896	0.697792	0.980724	0.129613	0.398174	0.276364	0.0183244	0.673843	0.658596	0.631747	0.640567	0.886114	0.77635	0.893062	0.800923	0.901012	0.87447	0.87544	0.807594	0.866359	0.892174	0.74364
rs314679159	SEMA3A	395825	1	8723159	intron-variant	ss538137772	AX-75544743	A/G	0.571886	0.88592	0.409418	0.143137	0.888932	0.751172	0.48637	0.922958	0.989966	0.930549	0.390313	0.721771	0.295072	0.7326	0.100387	0.975234	0.421119	0.10488	0.975144	0.0870775	0.246362	0.679458	0.877731	0.732034	0.55039	0.561441	0.711398	0.958688	0.956617	0.637557	0.564924	0.602801	0.520999	0.379453	0.349293	0.575365	0.337793	0.504144	0.468713	0.449018	0.468585
rs14789953	SEMA3A	395825	1	8729302	reference,synonymous-codon	ss538237428	AX-75544885	A/G	0.195187	0.515911	0.6816	0.100161	0.603599	0.900526	0.97433	0.116292	0.480479	0.706127	0.141268	0.70648	0.331765	0.326216	0.167906	0.0293088	0.0435766	0.832081	0.0293012	0.793135	0.00939638	0.170932	0.113064	0.875808	0.559338	0.0394579	0.0817277	0.0675198	0.0754757	0.113315	0.103731	0.126294	0.0969667	0.115594	0.168233	0.232617	0.180461	0.118163	0.110506	0.102651	0.104785
rs316665684	SEMA3A	395825	1	8730530	intron-variant	ss537871846	AX-80775124	C/G	0.029491	0.328812	0.757502	0.0962968	0.21028	0.0563691	0.717794	0.312547	0.343587	0.150012	0.518287	0.352048	0.513781	0.397174	0.101931	0.29089	0.591159	0.0187325	0.290855	0.818453	0.911548	0.949259	0.221062	0.604514	0.407175	0.0337069	0.637576	0.613904	0.585146	0.610218	0.872751	0.758703	0.858418	0.767723	0.880475	0.8347	0.810578	0.7518	0.829046	0.860908	0.726885
rs315787790	SEMA3A	395825	1	8737091	intron-variant	ss538105515	AX-75545050	G/T	0.0750878	0.375994	0.276353	0.183104	0.821942	0.147021	0.0807331	0.761512	0.756664	0.317954	0.147494	0.682605	0.690154	0.772747	0.0252929	0.9735	0.175943	0.0265294	0.973518	0.182681	0.509557	0.652989	0.329698	0.288834	0.578241	0.207634	0.576749	0.420586	0.388436	0.504739	0.655199	0.496226	0.65532	0.785525	0.782303	0.622664	0.847173	0.787347	0.903695	0.948176	0.824142
rs313190903	SEMA3A	395825	1	8741818	intron-variant	ss537966225	AX-75545161	A/G	0.195187	0.515911	0.6816	0.100161	0.603599	0.900526	0.959901	0.116292	0.480479	0.706127	0.120304	0.70648	0.331765	0.326216	0.167906	0.0293088	0.0435766	0.832081	0.0293012	0.793135	0.00939638	0.170932	0.113064	0.875808	0.66066	0.0394579	0.086693	0.0716637	0.0796862	0.118988	0.109041	0.131427	0.0997766	0.117371	0.169616	0.233831	0.181154	0.118946	0.111224	0.102801	0.104629
rs13825203	SEMA3A	395825	1	8743605	intron-variant	ss538227501	AX-75545193	C/T	0.0870692	0.258245	0.756722	0.0538278	0.905474	0.0436986	0.261315	0.981583	0.196783	0.336418	0.94103	0.641016	0.396218	0.375511	0.0360785	0.872935	0.200819	0.0172061	0.872892	0.888046	0.608089	0.787667	0.454909	0.656461	0.300382	0.18059	0.632097	0.766122	0.814918	0.62087	0.460121	0.580525	0.500578	0.539132	0.460192	0.636205	0.56812	0.558132	0.521378	0.503398	0.54121
rs317005870	SEMA3A	395825	1	8745956	intron-variant	ss538104606	AX-75545245	A/G	0.029491	0.328812	0.757502	0.0962968	0.21028	0.0563691	0.649917	0.312547	0.343587	0.150012	0.687353	0.352048	0.513781	0.397174	0.101931	0.29089	0.591159	0.0187325	0.290855	0.818453	0.911548	0.949259	0.221062	0.604514	0.367823	0.0337069	0.703917	0.671561	0.636536	0.657436	0.986046	0.879944	0.981475	0.907288	0.96268	0.898172	0.881347	0.822586	0.899671	0.933504	0.794541
rs15187806	SEMA3A	395825	1	8747997	intron-variant	ss537949226	AX-75545283	A/C	0.0713092	0.302217	0.996443	0.0874202	0.554128	0.0452557	0.307825	0.875156	0.161448	0.404787	0.902345	0.778898	0.539825	0.535895	0.0212597	0.93393	0.130497	0.0153799	0.93395	0.918022	0.368898	0.772066	0.50454	0.49037	0.249796	0.184314	0.467867	0.58526	0.636648	0.487507	0.357851	0.46158	0.37969	0.406977	0.366583	0.515339	0.444213	0.443825	0.402808	0.371426	0.400123
rs316353848	SEMA3A	395825	1	8748417	intron-variant	ss537792796	AX-75545292	A/G	0.103642	0.224907	0.206054	0.26955	0.819706	0.502773	0.98214	0.836864	0.713722	0.908933	0.546617	0.702221	0.214746	0.181611	0.167414	0.886497	0.579215	0.315275	0.882084	0.350624	0.651741	0.521834	0.227922	0.654416	0.591042	0.87637	0.61524	0.758664	0.771612	0.599012	0.589014	0.729482	0.647643	0.578368	0.682431	0.751009	0.446658	0.635524	0.547322	0.493799	0.481613
rs317036511	SEMA3A	395825	1	8756241	intron-variant	ss538074765	AX-80905628	A/T	0.449912	0.982298	0.347742	0.22917	0.213589	0.164455	0.433015	0.643694	0.760046	0.0596218	0.199596	0.138104	0.0411473	0.03719	0.88622	0.236428	0.915751	0.242507	0.234423	0.747114	0.138423	0.721501	0.72547	0.373965	0.126268	0.055405	0.447683	0.57272	0.562115	0.395926	0.610952	0.61227	0.605092	0.486769	0.654073	0.606412	0.414858	0.486447	0.527919	0.503728	0.359412
rs316815055	SEMA3A	395825	1	8764014	intron-variant	ss538159116	AX-75545615	A/G	0.0390417	0.103789	0.503166	0.836367	0.797678	0.100076	0.158693	0.843805	0.736417	0.142589	0.415521	0.34741	0.363787	0.0913374	0.0286253	0.528338	0.121732	0.107694	0.524723	0.438033	0.868681	0.291808	0.306277	0.33914	0.733678	0.387884	0.61181	0.630541	0.608137	0.464277	0.587499	0.421225	0.672782	0.675973	0.576296	0.586124	0.805332	0.77358	0.796893	0.829553	0.634976
rs312507548	SEMA3A	395825	1	8764200	intron-variant	ss537748239	AX-75545623	A/G	0.33613	0.464646	0.370453	0.398728	0.619186	0.712553	0.372756	0.892313	0.864493	0.834959	0.810827	0.720579	0.201839	0.115914	0.170349	0.88659	0.607666	0.278123	0.881982	0.2495	0.72868	0.382319	0.710934	0.893307	0.647445	0.80409	0.555956	0.739424	0.719699	0.481028	0.51385	0.562151	0.449931	0.356821	0.360114	0.506459	0.276679	0.445332	0.515797	0.510117	0.506975
rs315034028	SEMA3A	395825	1	8768623	intron-variant	ss537847116	AX-75545719	A/G	0.60762	0.990837	0.28953	0.136477	0.258187	0.734165	0.159085	0.895144	0.492594	0.303602	0.690393	0.296734	0.509998	0.532957	0.94317	0.417281	0.5159	0.602261	0.417305	0.898813	0.623625	0.289826	0.72337	0.987225	0.365676	0.566778	0.937986	0.704133	0.690471	0.761364	0.924119	0.929132	0.934076	0.886533	0.771782	0.953482	0.903535	0.995121	0.966274	0.969716	0.819223
rs313891875	SEMA3A	395825	1	8768947	intron-variant	ss537882781	AX-80792015	A/T	0.341732	0.432293	0.4093	0.350598	0.670995	0.872829	0.422701	0.865749	0.715241	0.785306	0.774885	0.658975	0.179727	0.10845	0.149423	0.873333	0.56842	0.253029	0.868752	0.233877	0.69703	0.486265	0.787832	0.880668	0.627779	0.722786	0.495639	0.668742	0.65021	0.424798	0.45513	0.501732	0.39734	0.313098	0.318205	0.453083	0.240748	0.396832	0.463803	0.458033	0.455439
rs314808572	SEMA3A	395825	1	8769434	intron-variant	ss537733734	AX-75545742	A/G	0.0390417	0.103789	0.503166	0.836367	0.797678	0.100076	0.1509	0.843805	0.736417	0.142589	0.444027	0.34741	0.363787	0.0913374	0.0286253	0.528338	0.121732	0.107694	0.524723	0.438033	0.868681	0.291808	0.306277	0.33914	0.714061	0.387884	0.648753	0.662939	0.635095	0.481692	0.604501	0.433241	0.687697	0.689735	0.589741	0.603479	0.827263	0.8021	0.831372	0.867025	0.670649
rs13825193	SEMA3A	395825	1	8771739	intron-variant	ss538058953	AX-75545782	G/T	0.0390417	0.103789	0.503166	0.836367	0.797678	0.100076	0.162549	0.843805	0.736417	0.142589	0.432043	0.34741	0.363787	0.0913374	0.0286253	0.528338	0.121732	0.107694	0.524723	0.438033	0.868681	0.291808	0.306277	0.33914	0.724671	0.387884	0.648199	0.667522	0.644218	0.494647	0.623004	0.450457	0.710682	0.713164	0.610821	0.621979	0.844124	0.812619	0.835854	0.866969	0.667635
rs317276615	SEMA3A	395825	1	8775344	intron-variant	ss538283213	AX-80772647	C/G	0.0703976	0.430288	0.951495	0.849168	0.806363	0.0549359	0.650048	0.426485	0.797837	0.0572414	0.175185	0.120479	0.488998	0.826328	0.981064	0.239172	0.673786	0.541309	0.239192	0.835898	0.0907055	0.150711	0.104234	0.475968	0.405272	0.0922417	0.0257654	0.042689	0.0397864	0.0136239	0.0263558	0.0175976	0.0246158	0.0190359	0.0190932	0.0473597	0.0269692	0.0373475	0.0513927	0.052422	0.0278985
rs312581699	SEMA3A	395825	1	8776960	intron-variant	ss538042770	AX-75545890	A/C	0.104757	0.550657	0.89266	0.821697	0.428417	0.0916311	0.645034	0.245385	0.893407	0.057194	0.123133	0.108985	0.405648	0.391041	0.649471	0.117065	0.368938	0.601024	0.115633	0.78472	0.388234	0.485321	0.172468	0.627913	0.307626	0.0467912	0.0333157	0.0463975	0.0406393	0.0162804	0.0322403	0.0215807	0.026872	0.0234863	0.0264419	0.0601393	0.0333514	0.0512159	0.0755589	0.0840068	0.0510595
rs80780448	SEMA3A	395825	1	8778993	intron-variant	ss538208439	AX-75545935	C/T	0.729022	0.874841	0.679805	0.85664	0.396702	0.768951	0.355026	0.1095	0.413367	0.478102	0.46178	0.413088	0.986452	0.815538	0.275411	0.119253	0.149195	0.760188	0.119237	0.870797	0.146808	0.614085	0.505043	0.759654	0.610051	0.323758	0.151045	0.212149	0.22873	0.148878	0.184986	0.207544	0.198857	0.175178	0.202145	0.309024	0.228617	0.193827	0.201659	0.192052	0.148307
rs317298368	SEMA3A	395825	1	8782349	intron-variant	ss537880750	AX-80806343	A/T	0.195187	0.515911	0.6816	0.100161	0.603599	0.900526	0.933932	0.116292	0.480479	0.706127	0.12288	0.70648	0.331765	0.326216	0.167906	0.0293088	0.0435766	0.832081	0.0293012	0.793135	0.00939638	0.170932	0.113064	0.875808	0.663146	0.0394579	0.0892345	0.0738768	0.0821939	0.122287	0.111982	0.134879	0.102664	0.12045	0.173486	0.238982	0.18552	0.121944	0.113858	0.105335	0.1073
rs314221847	SEMA3A	395825	1	8782884	intron-variant	ss537890850	AX-75546019	G/T	0.238341	0.252392	0.224026	0.202477	0.183329	0.399949	0.22037	0.363813	0.787681	0.631197	0.731687	0.489196	0.436783	0.766821	0.564098	0.787008	0.66863	0.769712	0.779934	0.869748	0.0351351	0.0578677	0.255931	0.398031	0.350191	0.702998	0.778519	0.599625	0.622372	0.964243	0.785446	0.793206	0.761876	0.850988	0.87343	0.783493	0.875077	0.745604	0.651166	0.608074	0.715551
rs317880714	SEMA3A	395825	1	8785407	intron-variant	ss537857464	AX-75546059	A/G	0.0650142	0.157028	0.630258	0.570788	0.819562	0.16214	0.158787	0.899502	0.516907	0.152406	0.375048	0.338377	0.437919	0.267998	0.0789607	0.777722	0.274978	0.135551	0.777698	0.483708	0.37401	0.704693	0.43125	0.457369	0.681418	0.270548	0.875793	0.851542	0.810009	0.679027	0.837592	0.636931	0.892633	0.92133	0.837669	0.829559	0.943302	0.953268	0.90668	0.850442	0.95538
rs317028302	SEMA3A	395825	1	8788247	intron-variant	ss537733864	AX-75546063	C/T	0.60762	0.990837	0.28953	0.136477	0.258187	0.734165	0.133051	0.895144	0.492594	0.303602	0.690393	0.296734	0.509998	0.532957	0.94317	0.417281	0.5159	0.602261	0.417305	0.898813	0.623625	0.289826	0.72337	0.987225	0.365676	0.566778	0.937986	0.704133	0.690471	0.761364	0.924119	0.929132	0.934076	0.886533	0.771782	0.953482	0.903535	0.995121	0.966274	0.969716	0.819223
rs318206255	SEMA3A	395825	1	8788269	intron-variant	ss537929830	AX-80900556	A/T	0.195187	0.515911	0.6816	0.100161	0.603599	0.900526	0.931027	0.116292	0.480479	0.706127	0.121739	0.70648	0.331765	0.326216	0.167906	0.0293088	0.0435766	0.832081	0.0293012	0.793135	0.00939638	0.170932	0.113064	0.875808	0.656242	0.0394579	0.0894595	0.0740815	0.0824266	0.12262	0.112443	0.135307	0.103024	0.120949	0.17417	0.240174	0.186072	0.12249	0.114326	0.10571	0.107637
rs315542059	SEMA3A	395825	1	8793951	intron-variant	ss537839140	AX-75546145	C/T	0.724279	0.658596	0.661582	0.757574	0.984785	0.597159	0.496174	0.467537	0.688438	0.576966	0.761057	0.867669	0.31836	0.397718	0.288659	0.843299	0.932481	0.370886	0.845873	0.57311	0.913192	0.750328	0.841792	0.508065	0.509002	0.222086	0.722678	0.739877	0.722178	0.703568	0.716303	0.795747	0.631122	0.680986	0.582744	0.637001	0.363851	0.582554	0.644159	0.620846	0.610338
rs316336924	SEMA3A	395825	1	8796420	intron-variant	ss537886945	AX-75546200	G/T	0.0432838	0.322902	0.44434	0.70895	0.694002	0.144366	0.0912797	0.278382	0.635445	0.0910731	0.109972	0.269359	0.91093	0.984265	0.405938	0.130979	0.592082	0.129235	0.131652	0.671533	0.0628638	0.0709341	0.0888481	0.266954	0.511753	0.0120802	0.103566	0.0943778	0.090539	0.0838509	0.10523	0.0656826	0.102365	0.0961098	0.136732	0.185357	0.241083	0.170112	0.182209	0.195055	0.164266
rs13787486	SEMA3A	395825	1	8803073	intron-variant	ss537879596	AX-75546340	A/G	0.12651	0.658082	0.16521	0.507606	0.249209	0.299642	0.00428986	0.602759	0.576071	0.122678	0.0860907	0.415599	0.80575	0.441324	0.726941	0.176178	0.421658	0.27827	0.177014	0.65223	0.00668887	0.0100885	0.0236196	0.0266047	0.467993	0.0172441	0.11741	0.0883245	0.0920275	0.155719	0.149687	0.0908292	0.111781	0.120904	0.164487	0.174396	0.247302	0.157669	0.153224	0.15121	0.138019
rs315716501	SEMA3A	395825	1	8808393	intron-variant	ss538075041	AX-75546468	G/T	0.195187	0.515911	0.6816	0.100161	0.603599	0.900526	0.970431	0.116292	0.480479	0.706127	0.140174	0.70648	0.331765	0.326216	0.167906	0.0293088	0.0435766	0.832081	0.0293012	0.793135	0.00939638	0.170932	0.113064	0.875808	0.608223	0.0394579	0.0934462	0.0766252	0.0845056	0.124486	0.113121	0.135978	0.103379	0.12084	0.174995	0.243324	0.190913	0.127788	0.121418	0.11374	0.117442
rs315285729	SEMA3A	395825	1	8809385	intron-variant	ss538182289	AX-75546490	A/G	0.258501	0.585773	0.362218	0.748878	0.601331	0.221554	0.150764	0.366618	0.826957	0.115307	0.157683	0.371429	0.976736	0.444281	0.556327	0.31331	0.427448	0.934812	0.313349	0.903603	0.0192713	0.0102624	0.0213965	0.13641	0.472454	0.342093	0.0288482	0.0373336	0.038511	0.0328876	0.0449941	0.0291085	0.0281862	0.026125	0.0259572	0.0408784	0.0246936	0.0285528	0.0349276	0.0314362	0.0188031
rs13825187	SEMA3A	395825	1	8811113	intron-variant	ss537920589	AX-75546523	A/G	0.0611638	0.262322	0.629517	0.955686	0.591941	0.00790036	0.108034	0.554545	0.621301	0.10597	0.317265	0.273871	0.390214	0.969552	0.295293	0.925263	0.365202	0.294193	0.925164	0.667843	0.525494	0.206879	0.193021	0.24629	0.108769	0.254318	0.174658	0.194954	0.166955	0.0991285	0.145096	0.083907	0.12384	0.110982	0.0921856	0.130688	0.109796	0.183781	0.236969	0.253656	0.182432
rs15187754	SEMA3A	395825	1	8812997	intron-variant	ss538076736	AX-75546576	C/T	0.303296	0.796303	0.360126	0.7193	0.515005	0.251001	0.116129	0.366618	0.946307	0.197418	0.221142	0.371429	0.885949	0.614051	0.590782	0.258723	0.40164	0.810174	0.258757	0.945581	0.0372557	0.0193857	0.0582667	0.13641	0.536001	0.272267	0.046477	0.058373	0.0602134	0.0519659	0.0690364	0.0454154	0.0449902	0.0431095	0.0437193	0.0688285	0.0437991	0.0512381	0.0622373	0.057325	0.0361907
rs314590983	SEMA3A	395825	1	8814291	intron-variant	ss538154964	AX-75546608	A/C	0.452634	0.705702	0.483256	0.801384	0.34999	0.251273	0.129051	0.36594	0.972945	0.172379	0.215441	0.328579	0.995646	0.543941	0.673392	0.297098	0.478249	0.719237	0.297122	0.963358	0.0368812	0.0403368	0.0967595	0.13921	0.47761	0.273992	0.0415861	0.0523698	0.0538812	0.0463461	0.0618692	0.0403766	0.0393345	0.0370596	0.0369184	0.0583382	0.0364971	0.0427077	0.0524552	0.0482698	0.0305661
rs13825181	SEMA3A	395825	1	8819720	intron-variant	ss538128173	AX-75546742	C/T	0.203237	0.525018	0.695863	0.103843	0.629274	0.90424	0.974055	0.107606	0.462088	0.702906	0.144199	0.68833	0.319661	0.311706	0.156058	0.0296364	0.0410408	0.800515	0.0296283	0.833559	0.00945714	0.160951	0.121595	0.923188	0.626243	0.0402475	0.0908768	0.074295	0.0820075	0.120997	0.109745	0.132324	0.100955	0.119115	0.173249	0.241702	0.189746	0.12695	0.120722	0.113122	0.117164
rs316519215	SEMA3A	395825	1	8820003	intron-variant	ss538012419	AX-75546749	A/C	0.410757	0.739934	0.503898	0.749776	0.404895	0.255858	0.113578	0.391463	0.943634	0.1646	0.215134	0.324017	0.991155	0.513865	0.598887	0.267118	0.418559	0.794724	0.267143	0.894886	0.0342972	0.0341953	0.0833872	0.130554	0.485536	0.240989	0.0370148	0.0463001	0.0474255	0.0408118	0.0547004	0.0353258	0.034016	0.0315815	0.0314405	0.049397	0.0303415	0.0357435	0.0448184	0.0414576	0.0257042
rs15187752	SEMA3A	395825	1	8823568	intron-variant	ss537965473	AX-75546820	A/G	0.187023	0.800487	0.336423	0.928597	0.678609	0.202296	0.114396	0.28889	0.820275	0.137862	0.15043	0.309579	0.672872	0.694257	0.586835	0.357656	0.486818	0.932913	0.357682	0.930473	0.0183798	0.0220974	0.0287015	0.0672386	0.361503	0.185667	0.0489506	0.0633283	0.065918	0.0539474	0.0678692	0.0450877	0.0457308	0.0425822	0.0407226	0.0667072	0.0458682	0.0527127	0.061065	0.0552695	0.0338508
rs317143863	SEMA3A	395825	1	8823781	intron-variant	ss538241451	AX-75546829	C/T	0.576366	0.87597	0.45089	0.329899	0.435065	0.202497	0.0947389	0.032871	0.846182	0.172488	0.612188	0.395289	0.880338	0.309478	0.748734	0.664155	0.567713	0.819778	0.66407	0.792774	0.417903	0.12548	0.197846	0.0737567	0.515159	0.877963	0.341811	0.441168	0.434308	0.315769	0.387107	0.267897	0.313071	0.279066	0.217186	0.256947	0.225043	0.311577	0.355642	0.344287	0.242208
rs80714994	SEMA3A	395825	1	8825273	intron-variant	ss538062004	AX-75546867	C/T	0.195187	0.515911	0.6816	0.100161	0.603599	0.900526	0.966035	0.116292	0.480479	0.706127	0.140174	0.70648	0.331765	0.326216	0.167906	0.0293088	0.0435766	0.832081	0.0293012	0.793135	0.00939638	0.170932	0.113064	0.875808	0.608223	0.0394579	0.0934462	0.0766252	0.0845056	0.124486	0.113121	0.135978	0.103379	0.12084	0.174995	0.243324	0.190913	0.127788	0.121418	0.11374	0.117442
rs317303996	SEMA3A	395825	1	8826144	intron-variant	ss538040902	AX-75546881	A/C	0.576366	0.87597	0.45089	0.329899	0.435065	0.202497	0.0947389	0.032871	0.846182	0.172488	0.612188	0.395289	0.880338	0.309478	0.748734	0.664155	0.567713	0.819778	0.66407	0.792774	0.417903	0.12548	0.197846	0.0737567	0.515159	0.877963	0.341811	0.441168	0.434308	0.315769	0.387107	0.267897	0.313071	0.279066	0.217186	0.256947	0.225043	0.311577	0.355642	0.344287	0.242208
rs312309623	SEMA3A	395825	1	8826531	intron-variant	ss537881364	AX-75546890	C/T	0.842964	0.753318	0.892307	0.45809	0.708575	0.585951	0.486384	0.392835	0.653449	0.69332	0.981933	0.910323	0.267242	0.553872	0.386557	0.829991	0.906805	0.43912	0.832406	0.487054	0.89502	0.888677	0.873835	0.795822	0.340766	0.393816	0.704903	0.738332	0.72901	0.697346	0.694203	0.777967	0.635546	0.67671	0.566652	0.630989	0.388215	0.589215	0.621297	0.589645	0.560982
rs315126879	SEMA3A	395825	1	8828219	reference,synonymous-codon	ss537868448	AX-75546917	A/C	0.929495	0.428592	0.414689	0.673285	0.73137	0.252895	0.33563	0.943521	0.938354	0.516855	0.46134	0.742793	0.171955	0.263565	0.716608	0.176733	0.1621	0.786693	0.177622	0.409125	0.0632004	0.125078	0.238288	0.235222	0.279492	0.241963	0.507238	0.527092	0.591075	0.700858	0.672182	0.622605	0.644183	0.623367	0.758755	0.767044	0.945318	0.618403	0.556401	0.531699	0.511506
rs313035260	SEMA3A	395825	1	8831645	intron-variant	ss537801679	AX-75546991	G/T	0.144332	0.0978488	0.564763	0.147406	0.580922	0.204827	0.547383	0.00864801	0.757211	0.944926	0.670211	0.959101	0.222642	0.118541	0.428194	0.575921	0.819292	0.347534	0.575902	0.929101	0.63459	0.41134	0.692848	0.178772	0.404425	0.256619	0.894679	0.75076	0.69381	0.708845	0.71947	0.753869	0.808942	0.84444	0.935315	0.975061	0.988099	0.997391	0.975622	0.917648	0.83469
rs313172394	SEMA3A	395825	1	8833011	intron-variant	ss538017088	AX-80867924	A/T	0.554651	0.72937	0.384243	0.508058	0.474866	0.857534	0.115246	0.610585	0.441724	0.922351	0.549832	0.784014	0.533859	0.770283	0.299915	0.541502	0.829476	0.229473	0.54358	0.468898	0.577349	0.457438	0.638019	0.520722	0.939087	0.186332	0.740923	0.969703	0.96233	0.630493	0.730591	0.803454	0.721115	0.655072	0.504257	0.643891	0.370777	0.626204	0.701742	0.675924	0.555019
rs13825173	SEMA3A	395825	1	8836230	intron-variant	ss538256321	AX-75547092	C/T	0.0611638	0.262322	0.629517	0.955686	0.591941	0.00790036	0.111168	0.554545	0.621301	0.10597	0.308179	0.273871	0.390214	0.969552	0.295293	0.925263	0.365202	0.294193	0.925164	0.667843	0.525494	0.206879	0.193021	0.24629	0.104691	0.254318	0.177962	0.198673	0.170396	0.101057	0.148152	0.0861383	0.127635	0.114959	0.0958591	0.135165	0.113557	0.189484	0.243874	0.260088	0.187402
rs80696616	SEMA3A	395825	1	8837851	intron-variant	ss537998065	AX-75547124	A/G	0.298924	0.848293	0.364002	0.783453	0.542078	0.200582	0.113115	0.382736	0.984844	0.202628	0.197798	0.38062	0.917278	0.611125	0.630541	0.269948	0.43215	0.778047	0.269985	0.971202	0.0413999	0.0261704	0.0650141	0.138775	0.494595	0.24872	0.0435857	0.0549277	0.0565187	0.0485137	0.0645966	0.0422601	0.0414233	0.0391582	0.0392204	0.0620908	0.0390549	0.0456647	0.0558009	0.0513665	0.0322274
rs315203408	SEMA3A	395825	1	8844460	intron-variant	ss538269098	AX-75547278	A/C	0.0618058	0.0158061	0.636645	0.0353025	0.368078	0.155213	0.612836	0.0247732	0.971656	0.787773	0.726231	0.805529	0.117221	0.100683	0.455806	0.83237	0.660547	0.513675	0.832308	0.909353	0.98584	0.395877	0.942291	0.442358	0.245524	0.155929	0.984728	0.861128	0.811282	0.802027	0.787074	0.829526	0.901609	0.933223	0.999987	0.943246	0.894204	0.895344	0.893151	0.841527	0.777182
rs316107619	SEMA3A	395825	1	8846096	intron-variant	ss537758614	AX-80912667	A/T	0.124755	0.900263	0.147608	0.609869	0.574483	0.404812	0.0351412	0.680466	0.876796	0.0745244	0.0987177	0.285863	0.585185	0.353797	0.671281	0.189387	0.455483	0.291245	0.190385	0.553261	0.0199097	0.00608508	0.020063	0.0422618	0.974743	0.0540443	0.0877307	0.104913	0.112369	0.100631	0.14368	0.0794663	0.117183	0.106739	0.136239	0.160667	0.214385	0.142094	0.144203	0.139069	0.0970242
rs316822792	SEMA3A	395825	1	8847968	intron-variant	ss538177970	AX-75547356	C/T	0.60762	0.990837	0.28953	0.136477	0.258187	0.734165	0.150236	0.895144	0.492594	0.303602	0.759982	0.296734	0.509998	0.532957	0.94317	0.417281	0.5159	0.602261	0.417305	0.898813	0.623625	0.289826	0.72337	0.987225	0.402207	0.566778	0.959075	0.606993	0.591672	0.866959	0.967806	0.966178	0.838356	0.969483	0.843798	0.972623	0.975811	0.93815	0.901547	0.905796	0.880407
rs15187708	SEMA3A	395825	1	8850382	downstream-variant-500B	ss538046004	AX-75547407	A/G	0.195187	0.515911	0.6816	0.100161	0.603599	0.900526	0.959249	0.116292	0.480479	0.706127	0.137196	0.70648	0.331765	0.326216	0.167906	0.0293088	0.0435766	0.832081	0.0293012	0.793135	0.00939638	0.170932	0.113064	0.875808	0.61683	0.0394579	0.0946136	0.077526	0.0854524	0.125863	0.114147	0.13712	0.104151	0.121651	0.176425	0.2454	0.192861	0.129101	0.122594	0.114881	0.118346
rs314081390	CACNA2D1	768444	1	10043310	upstream-variant-2KB	ss537809809	AX-75197568	A/G	0.306593	0.360096	0.33193	0.685725	0.695227	0.51577	0.570756	0.528918	0.894503	0.507849	0.59304	0.683222	0.697319	0.847325	0.409146	0.261658	0.395738	0.929257	0.262848	0.326006	0.00244102	0.526983	0.2287	0.420979	0.975847	0.543155	0.841505	0.939157	0.958645	0.956782	0.993511	0.940311	0.807737	0.657204	0.86789	0.841446	0.638994	0.612227	0.646942	0.621848	0.655857
rs313831591	CACNA2D1	768444	1	10051189	intron-variant	ss538203522	AX-75197729	C/T	0.317032	0.163178	0.154864	0.703723	0.87945	0.271856	0.832389	0.400196	0.826172	0.0841144	0.626886	0.22598	0.62751	0.619815	0.458613	0.222423	0.455203	0.723745	0.221375	0.114454	0.0424692	0.529096	0.172517	0.160174	0.505631	0.230306	0.59646	0.677899	0.679582	0.788265	0.796418	0.848095	0.648952	0.497603	0.809748	0.686691	0.526347	0.546308	0.598031	0.579363	0.564762
rs314533846	CACNA2D1	768444	1	10054331	intron-variant	ss537920804	AX-75197736	C/T	0.572038	0.821364	0.555956	0.367321	0.545694	0.642057	0.448453	0.209049	0.816842	0.00552279	0.0851234	0.0302326	0.793341	0.653982	0.286768	0.736685	0.288704	0.407163	0.73661	0.253941	0.541598	0.043769	0.161342	0.103819	0.517367	0.480553	0.248569	0.307187	0.30948	0.284975	0.322373	0.321742	0.386452	0.317632	0.45137	0.355519	0.387462	0.416167	0.404968	0.372392	0.276415
rs312506744	CACNA2D1	768444	1	10055487	intron-variant	ss538237387	AX-75197737	A/C	0.0242169	0.121378	0.644108	0.796925	0.506499	0.432188	0.780528	0.125257	0.691835	0.897445	0.893188	0.809225	0.196677	0.164727	0.299459	0.43971	0.169945	0.316629	0.437713	0.547992	0.826668	0.227808	0.974599	0.302063	0.659651	0.864747	0.622191	0.573019	0.569603	0.482058	0.53476	0.599295	0.769919	0.812851	0.736361	0.788203	0.931242	0.874155	0.843484	0.857983	0.861561
rs317186545	CACNA2D1	768444	1	10056442	intron-variant	ss538052321	AX-75197738	C/T	0.502052	0.330162	0.22604	0.945101	0.502399	0.397759	0.913458	0.222061	0.804236	0.0433765	0.754297	0.142931	0.612889	0.958565	0.806739	0.374408	0.787491	0.618292	0.375849	0.13478	0.00153844	0.109316	0.0569298	0.104436	0.766651	0.353378	0.412838	0.525474	0.54192	0.590351	0.580125	0.634544	0.474399	0.321221	0.552046	0.468164	0.344304	0.342168	0.362572	0.333101	0.309141
rs314656837	CACNA2D1	768444	1	10057539	intron-variant	ss537732881	AX-75197745	C/T	0.028968	0.10081	0.151464	0.624576	0.480734	0.355076	0.376282	0.0912871	0.537021	0.923699	0.251557	0.858711	0.731992	0.5942	0.974947	0.84744	0.689232	0.731322	0.844913	0.143911	0.410089	0.431503	0.784451	0.397443	0.77677	0.635851	0.539924	0.428621	0.437618	0.399241	0.399067	0.401689	0.574565	0.779895	0.60883	0.759721	0.950089	0.857649	0.799218	0.814818	0.788885
rs313947304	CACNA2D1	768444	1	10058165	intron-variant	ss538099278	AX-75197767	C/T	0.066531	0.0878483	0.770207	0.968544	0.37446	0.143133	0.0146468	0.842035	0.681212	0.262089	0.0391797	0.339218	0.803418	0.741159	0.299268	0.995382	0.43073	0.187502	0.995408	0.104886	0.112923	0.875274	0.150031	0.582001	0.661079	0.56964	0.442638	0.40597	0.445779	0.51575	0.566253	0.731105	0.749184	0.864161	0.945156	0.64651	0.706472	0.598755	0.470769	0.404823	0.321815
rs315816002	CACNA2D1	768444	1	10061475	intron-variant	ss537938812	AX-75197844	A/G	0.210987	0.913107	0.896585	0.556816	0.934506	0.839001	0.687202	0.783655	0.357981	0.00959477	0.0479362	0.0557005	0.274996	0.666611	0.627391	0.136173	0.349433	0.824646	0.136167	0.637719	0.00267021	0.00586665	0.0108732	0.195894	0.451392	0.0709856	0.031541	0.0332685	0.0364031	0.0460406	0.0469117	0.0570072	0.0554325	0.0527862	0.111333	0.118482	0.107357	0.0811285	0.0760331	0.0667428	0.0517577
rs15202900	CACNA2D1	768444	1	10062475	intron-variant	ss537915621	AX-75197868	G/T	0.0467377	0.174761	0.174282	0.688455	0.48097	0.392287	0.720898	0.0826226	0.720402	0.606377	0.15065	0.672409	0.819495	0.787909	0.749897	0.983313	0.669237	0.407706	0.986009	0.208001	0.205939	0.667455	0.94049	0.36719	0.807666	0.612083	0.340665	0.244857	0.247508	0.246401	0.257134	0.249076	0.389917	0.597503	0.474166	0.599294	0.77381	0.686884	0.63107	0.644303	0.613908
rs314121999	CACNA2D1	768444	1	10064100	intron-variant	ss538179741	AX-75197905	G/T	0.572038	0.821364	0.555956	0.367321	0.545694	0.642057	0.447585	0.209049	0.816842	0.00552279	0.0883208	0.0302326	0.793341	0.653982	0.286768	0.736685	0.288704	0.407163	0.73661	0.253941	0.541598	0.043769	0.161342	0.103819	0.522229	0.480553	0.252803	0.312235	0.314719	0.290078	0.32771	0.326956	0.391917	0.321863	0.455969	0.358969	0.391236	0.419465	0.40819	0.375512	0.279016
rs314624834	CACNA2D1	768444	1	10065170	intron-variant	ss537896441	AX-80783651	C/G	0.329154	0.159035	0.162588	0.584515	0.916267	0.277098	0.96033	0.423701	0.894369	0.0515841	0.613747	0.151434	0.476813	0.566957	0.552611	0.157778	0.419834	0.503105	0.156965	0.158865	0.041269	0.522055	0.205524	0.146231	0.521751	0.232792	0.548257	0.630298	0.634491	0.745727	0.759529	0.814056	0.623069	0.481511	0.792996	0.666355	0.502603	0.519034	0.565933	0.543964	0.527832
rs317900867	CACNA2D1	768444	1	10065536	intron-variant	ss537746290	AX-75197943	A/G	0.329154	0.159035	0.162588	0.584515	0.916267	0.277098	0.90216	0.423701	0.894369	0.0515841	0.660496	0.151434	0.476813	0.566957	0.552611	0.157778	0.419834	0.503105	0.156965	0.158865	0.041269	0.522055	0.205524	0.146231	0.500677	0.232792	0.567459	0.651087	0.657141	0.7714	0.786135	0.840721	0.647305	0.499306	0.811674	0.6836	0.515581	0.527497	0.570195	0.545281	0.526848
rs312587611	CACNA2D1	768444	1	10069801	intron-variant	ss537721622	AX-75198034	G/T	0.15808	0.189083	0.126649	0.394532	0.339196	0.31114	0.872741	0.0257155	0.85091	0.0429017	0.875203	0.115664	0.956994	0.614079	0.384321	0.867274	0.335244	0.234123	0.864887	0.0795056	0.14598	0.469397	0.455312	0.0806605	0.851506	0.960717	0.951395	0.748282	0.748021	0.768604	0.747715	0.732041	0.865602	0.852421	0.899009	0.887822	0.754796	0.853094	0.895737	0.852806	0.786931
rs313665920	CACNA2D1	768444	1	10070843	intron-variant	ss537770794	AX-75198055	C/T	0.0971004	0.105605	0.699897	0.848138	0.368043	0.279197	0.0282162	0.737784	0.765105	0.615325	0.0191015	0.73156	0.617684	0.544535	0.818041	0.735985	0.591183	0.885557	0.735972	0.12242	0.12328	0.781854	0.172049	0.74842	0.53387	0.639503	0.349476	0.316332	0.348342	0.408182	0.449967	0.601367	0.625714	0.739294	0.919199	0.538039	0.574396	0.496111	0.387683	0.33318	0.26813
rs316127799	CACNA2D1	768444	1	10075475	intron-variant	ss538290037	AX-75198123	C/T	0.0467377	0.174761	0.174282	0.688455	0.48097	0.392287	0.748842	0.0826226	0.720402	0.606377	0.13221	0.672409	0.819495	0.787909	0.749897	0.983313	0.669237	0.407706	0.986009	0.208001	0.205939	0.667455	0.94049	0.36719	0.83107	0.612083	0.346361	0.25159	0.256945	0.258905	0.271083	0.266429	0.41492	0.633231	0.510721	0.640261	0.820877	0.726642	0.670292	0.689781	0.657369
rs313692293	CACNA2D1	768444	1	10077998	intron-variant	ss537781047	AX-75198158	A/G	0.125037	0.149108	0.098921	0.671449	0.687647	0.232001	0.90776	0.0740068	0.596789	0.052358	0.740978	0.123223	0.9397	0.902933	0.668434	0.84266	0.633896	0.291986	0.840422	0.0763011	0.543044	0.997247	0.647143	0.152254	0.673393	0.811034	0.500319	0.374143	0.37733	0.374084	0.353914	0.337186	0.44882	0.671138	0.463872	0.653567	0.791494	0.684984	0.633363	0.657185	0.706608
rs314689707	CACNA2D1	768444	1	10081648	intron-variant	ss538051787	AX-80812139	C/G	0.0467377	0.174761	0.174282	0.688455	0.48097	0.392287	0.720898	0.0826226	0.720402	0.606377	0.15065	0.672409	0.819495	0.787909	0.749897	0.983313	0.669237	0.407706	0.986009	0.208001	0.205939	0.667455	0.94049	0.36719	0.807666	0.612083	0.340665	0.244857	0.247508	0.246401	0.257134	0.249076	0.389917	0.597503	0.474166	0.599294	0.77381	0.686884	0.63107	0.644303	0.613908
rs316773125	CACNA2D1	768444	1	10083792	intron-variant	ss537897848	AX-75198281	A/G	0.0391278	0.208908	0.722351	0.873521	0.505571	0.476083	0.949981	0.112999	0.903029	0.621189	0.547862	0.702768	0.22883	0.251609	0.148258	0.56754	0.150048	0.124304	0.565135	0.696686	0.509479	0.394756	0.854627	0.270281	0.651987	0.843138	0.385764	0.329891	0.320634	0.288349	0.340919	0.381934	0.530669	0.603986	0.566614	0.596835	0.728351	0.681463	0.664858	0.688749	0.700841
rs14796905	CACNA2D1	768444	1	10083845	intron-variant	ss538227913	AX-80743477	A/T	0.585167	0.398759	0.723428	0.214586	0.879408	0.781889	0.103008	0.639225	0.660383	0.0667854	0.0148665	0.212971	0.254317	0.139953	0.784476	0.174353	0.496539	0.608383	0.172394	0.425951	0.0723358	0.131114	0.161446	0.307646	0.28522	0.0331387	0.0847823	0.0712023	0.0801021	0.0934663	0.111405	0.17774	0.171191	0.20847	0.402992	0.260821	0.2848	0.221707	0.187583	0.164423	0.122929
rs313449751	CACNA2D1	768444	1	10087880	intron-variant	ss538261801	AX-75198376	C/T	0.0318962	0.163249	0.583906	0.761271	0.975064	0.352717	0.968907	0.277956	0.602392	0.645327	0.433953	0.687265	0.32044	0.680306	0.376351	0.904707	0.406281	0.179431	0.907379	0.660461	0.773861	0.106658	0.908023	0.438783	0.885634	0.884135	0.119409	0.106368	0.104164	0.084065	0.101448	0.114356	0.192909	0.225803	0.204582	0.23121	0.316205	0.278032	0.258629	0.261804	0.260748
rs13833989	CACNA2D1	768444	1	10089429	intron-variant	ss538163048	AX-75198405	A/G	0.572038	0.821364	0.555956	0.367321	0.545694	0.642057	0.447214	0.209049	0.816842	0.00552279	0.0887495	0.0302326	0.793341	0.653982	0.286768	0.736685	0.288704	0.407163	0.73661	0.253941	0.541598	0.043769	0.161342	0.103819	0.525962	0.480553	0.251236	0.310289	0.312632	0.287926	0.325387	0.324784	0.390116	0.320618	0.454777	0.358314	0.390427	0.419104	0.407876	0.375114	0.278818
rs318054815	CACNA2D1	768444	1	10092299	intron-variant	ss538173137	AX-75198480	G/T	0.125037	0.149108	0.098921	0.671449	0.687647	0.232001	0.908576	0.0740068	0.596789	0.052358	0.724341	0.123223	0.9397	0.902933	0.668434	0.84266	0.633896	0.291986	0.840422	0.0763011	0.543044	0.997247	0.647143	0.152254	0.672026	0.811034	0.505066	0.37781	0.380969	0.37808	0.357172	0.34101	0.453459	0.67692	0.469664	0.660027	0.799101	0.691813	0.641079	0.666599	0.717105
rs80715227	CACNA2D1	768444	1	10102353	intron-variant	ss538036377	AX-75198719	C/T	0.127241	0.0819619	0.0917155	0.854644	0.731876	0.214243	0.979186	0.0901709	0.611015	0.0835006	0.919555	0.184457	0.884486	0.915064	0.774474	0.698606	0.740514	0.328641	0.696491	0.0524409	0.685939	0.698968	0.85517	0.160033	0.638534	0.798461	0.68023	0.552081	0.564953	0.571856	0.538698	0.520756	0.653735	0.877599	0.620882	0.798139	0.944379	0.822113	0.75484	0.771073	0.808973
rs13833969	CACNA2D1	768444	1	10107235	intron-variant	ss537978361	AX-75198830	A/G	0.897279	0.364909	0.393184	0.996273	0.758106	0.416279	0.735279	0.628669	0.584337	0.0595713	0.0927263	0.158441	0.691843	0.695206	0.993417	0.78216	0.953244	0.682074	0.775409	0.300844	0.238313	0.943263	0.699732	0.28046	0.313031	0.308682	0.594753	0.611302	0.602454	0.667549	0.757469	0.754147	0.804453	0.78054	0.999426	0.831532	0.839244	0.904541	0.927399	0.91541	0.812959
rs317062365	CACNA2D1	768444	1	10111794	intron-variant	ss537758976	AX-75198933	A/G	0.15249	0.850925	0.946585	0.592391	0.268586	0.946659	0.320557	0.538806	0.722689	0.151975	0.120386	0.341758	0.197004	0.105658	0.308872	0.0673271	0.0547539	0.879736	0.0665534	0.998753	0.277947	0.236622	0.261462	0.378267	0.682966	0.0728771	0.391287	0.421175	0.440526	0.494691	0.618795	0.646335	0.709155	0.68993	0.931094	0.806857	0.999053	0.752052	0.704826	0.687746	0.652268
rs317880561	CACNA2D1	768444	1	10113322	intron-variant	ss538289049	AX-75198970	C/T	0.572038	0.821364	0.555956	0.367321	0.545694	0.642057	0.456808	0.209049	0.816842	0.00552279	0.0857156	0.0302326	0.793341	0.653982	0.286768	0.736685	0.288704	0.407163	0.73661	0.253941	0.541598	0.043769	0.161342	0.103819	0.517455	0.480553	0.250038	0.308867	0.311132	0.286421	0.323865	0.322913	0.387215	0.3172	0.450051	0.353664	0.385455	0.414031	0.403316	0.370898	0.275396
rs314421300	CACNA2D1	768444	1	10116022	intron-variant	ss538282810	AX-75199032	A/G	0.484782	0.441485	0.296262	0.556754	0.659782	0.848784	0.17524	0.933192	0.551999	0.0690905	0.0627184	0.224399	0.0652947	0.109189	0.438262	0.146496	0.302879	0.97491	0.146479	0.970749	0.00162776	0.0107093	0.155564	0.270059	0.378448	0.126981	0.0306626	0.0343127	0.0374989	0.0360456	0.0494247	0.0960969	0.0882753	0.0714851	0.198318	0.0958347	0.10075	0.0776205	0.0673651	0.0563341	0.0428827
rs316466991	CACNA2D1	768444	1	10118115	intron-variant	ss538283191	AX-75199074	G/T	0.618431	0.638799	0.617641	0.287994	0.16494	0.540856	0.677847	0.355559	0.328957	0.973613	0.51421	0.916603	0.708273	0.0703577	0.273204	0.321946	0.223169	0.829039	0.314304	0.869421	0.0309418	0.0540353	0.496146	0.565168	0.369405	0.434526	0.0239235	0.0340364	0.0361457	0.0270505	0.0238507	0.0208136	0.0290436	0.0264529	0.0251989	0.0323902	0.0385511	0.0322312	0.0266385	0.02199	0.018735
rs317862004	CACNA2D1	768444	1	10118661	intron-variant	ss538011877	AX-75199084	G/T	0.15249	0.850925	0.946585	0.592391	0.268586	0.946659	0.289798	0.538806	0.722689	0.151975	0.12514	0.341758	0.197004	0.105658	0.308872	0.0673271	0.0547539	0.879736	0.0665534	0.998753	0.277947	0.236622	0.261462	0.378267	0.659237	0.0728771	0.438098	0.469813	0.490773	0.549152	0.677214	0.704624	0.765566	0.740694	0.983241	0.859289	0.944949	0.80337	0.756014	0.741789	0.706176
rs316028177	CACNA2D1	768444	1	10121387	intron-variant	ss537951358	AX-75199132	C/T	0.400446	0.923002	0.391991	0.324951	0.770312	0.933795	0.533735	0.35801	0.589138	0.470156	0.814253	0.601848	0.039788	0.0699498	0.0123316	0.0138499	0.00436869	0.27853	0.0138786	0.459623	0.000618557	0.0733375	0.207058	0.97282	0.570579	0.29646	0.206909	0.222169	0.22442	0.251926	0.267247	0.360495	0.277298	0.207692	0.3497	0.350314	0.270758	0.223493	0.241859	0.240972	0.284105
rs315598192	CACNA2D1	768444	1	10126566	intron-variant	ss537901632	AX-75199230	C/T	0.985129	0.447339	0.127646	0.30187	0.967608	0.979491	0.392615	0.371298	0.979331	0.581924	0.826606	0.76341	0.13162	0.0480475	0.0473013	0.00786845	0.0102978	0.857669	0.00767904	0.324012	0.061721	0.457792	0.0805986	0.789072	0.448891	0.225484	0.704658	0.714702	0.720152	0.804441	0.840971	0.986884	0.845611	0.72878	0.978233	0.94739	0.794935	0.713457	0.749128	0.764149	0.8405
rs318085552	CACNA2D1	768444	1	10127934	intron-variant	ss537750458	AX-75199259	A/C	0.750324	0.629558	0.271786	0.14431	0.362833	0.674987	0.410816	0.192247	0.83867	0.78445	0.962221	0.901126	0.0455057	0.0257634	0.00343994	0.00772464	0.00134215	0.243635	0.00755581	0.450735	0.102213	0.693485	0.600804	0.799684	0.42412	0.167737	0.486403	0.460692	0.450163	0.555958	0.602732	0.720547	0.580798	0.516287	0.765558	0.727883	0.598104	0.55358	0.609862	0.632991	0.724983
rs314061186	CACNA2D1	768444	1	10133765	intron-variant	ss538114606	AX-80936315	C/G	0.391558	0.767897	0.344473	0.0767607	0.313999	0.950642	0.643668	0.109872	0.947181	0.259047	0.85789	0.333572	0.0398679	0.0209942	0.0023028	0.00880319	0.00100706	0.151951	0.0086022	0.611054	0.0887926	0.567205	0.310496	0.893485	0.480862	0.048483	0.523997	0.512512	0.509447	0.56283	0.60154	0.751549	0.615018	0.512564	0.712855	0.680505	0.56404	0.501661	0.544701	0.556816	0.627138
rs15202798	CACNA2D1	768444	1	10137736	intron-variant	ss538259957	AX-75199513	A/G	0.15249	0.850925	0.946585	0.592391	0.268586	0.946659	0.359238	0.538806	0.722689	0.151975	0.121705	0.341758	0.197004	0.105658	0.308872	0.0673271	0.0547539	0.879736	0.0665534	0.998753	0.277947	0.236622	0.261462	0.378267	0.790712	0.0728771	0.279371	0.296526	0.312743	0.372209	0.478183	0.556781	0.616558	0.546021	0.836186	0.651847	0.823388	0.595059	0.555866	0.545042	0.517812
rs13833960	CACNA2D1	768444	1	10139206	intron-variant	ss538260630	AX-75199544	G/T	0.572038	0.821364	0.555956	0.367321	0.545694	0.642057	0.528665	0.209049	0.816842	0.00552279	0.0546917	0.0302326	0.793341	0.653982	0.286768	0.736685	0.288704	0.407163	0.73661	0.253941	0.541598	0.043769	0.161342	0.103819	0.678045	0.480553	0.0795192	0.0994829	0.102578	0.104033	0.123587	0.166267	0.212511	0.132929	0.273408	0.153103	0.159351	0.176001	0.170198	0.151767	0.103008
rs315527047	CACNA2D1	768444	1	10140159	intron-variant	ss538271660	AX-75199564	C/T	0.108355	0.710932	0.306161	0.496072	0.187082	0.957257	0.23909	0.458672	0.962791	0.190382	0.0220719	0.419536	0.473586	0.263413	0.823092	0.166886	0.229623	0.764537	0.165338	0.471067	0.587834	0.295422	0.15725	0.348876	0.869304	0.055177	0.283888	0.266585	0.29231	0.372681	0.44009	0.469304	0.561177	0.622644	0.839483	0.751883	0.972916	0.704154	0.627428	0.608244	0.548683
rs15202789	CACNA2D1	768444	1	10140734	intron-variant	ss538107122	AX-75199575	G/T	0.489119	0.156071	0.704019	0.242253	0.740397	0.862385	0.0374578	0.705844	0.689906	0.749909	0.223354	0.679327	0.704435	0.086589	0.860235	0.803317	0.915217	0.611311	0.796112	0.0675372	0.372379	0.302328	0.359108	0.983925	0.543515	0.312593	0.960357	0.916512	0.941177	0.933839	0.97828	0.771106	0.805318	0.683547	0.527278	0.879531	0.763952	0.817692	0.897949	0.921215	0.992629
rs314865058	CACNA2D1	768444	1	10141834	intron-variant	ss537895374	AX-80986684	A/T	0.0469325	0.253721	0.218171	0.959602	0.25399	0.882848	0.956211	0.592632	0.86253	0.133827	0.181419	0.30002	0.606466	0.84477	0.749743	0.213313	0.207322	0.981306	0.213334	0.818428	0.304492	0.107515	0.052459	0.341175	0.79723	0.175935	0.279779	0.304452	0.323109	0.411704	0.441672	0.380304	0.474206	0.464501	0.558875	0.679422	0.816551	0.593056	0.56177	0.554249	0.530568
rs316516692	CACNA2D1	768444	1	10143409	intron-variant	ss537757037	AX-80746557	A/T	0.0469325	0.253721	0.218171	0.959602	0.25399	0.882848	0.999616	0.592632	0.86253	0.133827	0.144072	0.30002	0.606466	0.84477	0.749743	0.213313	0.207322	0.981306	0.213334	0.818428	0.304492	0.107515	0.052459	0.341175	0.682432	0.175935	0.252524	0.275639	0.292841	0.376416	0.406226	0.347996	0.441025	0.436379	0.533642	0.65189	0.788411	0.568548	0.536402	0.52628	0.501964
rs317128965	CACNA2D1	768444	1	10148551	intron-variant	ss538171802	AX-75199768	A/G	0.16416	0.830171	0.949616	0.769288	0.424777	0.773276	0.324697	0.594648	0.871104	0.0718607	0.236667	0.185196	0.218501	0.122621	0.309089	0.0628645	0.051521	0.865695	0.0621398	0.920368	0.122564	0.122898	0.179293	0.360691	0.865094	0.0833974	0.381855	0.414996	0.441727	0.483796	0.591139	0.694157	0.755549	0.653789	0.921154	0.738646	0.913646	0.667828	0.619436	0.60199	0.560213
rs13833957	CACNA2D1	768444	1	10154322	intron-variant	ss537938202	AX-75199921	G/T	0.117431	0.276415	0.178012	0.41907	0.0602369	0.866816	0.69783	0.155914	0.807505	0.848094	0.788418	0.952057	0.603537	0.333594	0.242501	0.0847613	0.0301519	0.663659	0.0838406	0.798858	0.950332	0.93947	0.283363	0.992978	0.875143	0.193353	0.699801	0.733845	0.719969	0.580443	0.571531	0.71295	0.681125	0.593822	0.642096	0.420635	0.330395	0.511458	0.519159	0.48782	0.429789
rs313286051	CACNA2D1	768444	1	10159529	intron-variant	ss537917506	AX-80755245	C/G	0.123673	0.209346	0.236301	0.451752	0.0978051	0.817575	0.886617	0.162641	0.808288	0.587556	0.991963	0.681133	0.718296	0.380625	0.300528	0.0912674	0.0390495	0.721183	0.0903019	0.82197	0.676144	0.853649	0.241201	0.995045	0.767029	0.172314	0.59908	0.61441	0.591835	0.489734	0.490831	0.602893	0.570804	0.508192	0.574933	0.362763	0.283855	0.461284	0.47885	0.458054	0.416544
rs14796875	CACNA2D1	768444	1	10161293	intron-variant	ss537800759	AX-75200108	C/T	0.117431	0.276415	0.178012	0.41907	0.0602369	0.866816	0.718225	0.155914	0.807505	0.848094	0.711777	0.952057	0.603537	0.333594	0.242501	0.0847613	0.0301519	0.663659	0.0838406	0.798858	0.950332	0.93947	0.283363	0.992978	0.825396	0.193353	0.674376	0.704661	0.685141	0.541309	0.528767	0.660541	0.62576	0.540129	0.586779	0.377961	0.299308	0.479968	0.492398	0.466023	0.416405
rs315448866	CACNA2D1	768444	1	10163721	intron-variant	ss537725831	AX-80918461	A/T	0.613492	0.157502	0.916218	0.499169	0.533298	0.816006	0.0148868	0.832276	0.83307	0.693714	0.115985	0.550798	0.829214	0.342508	0.298656	0.680225	0.300642	0.416914	0.680266	0.0146586	0.647645	0.907764	0.506418	0.691658	0.739834	0.482529	0.332068	0.283654	0.306594	0.27907	0.327359	0.482503	0.49154	0.599243	0.781985	0.439787	0.572033	0.489967	0.395697	0.358308	0.292246
rs313042108	CACNA2D1	768444	1	10165716	intron-variant	ss537795516	AX-75200216	A/G	0.939297	0.768548	0.191107	0.163968	0.142301	0.914269	0.245741	0.774735	0.68036	0.635637	0.341464	0.93957	0.74307	0.441862	0.695839	0.15807	0.402004	0.213766	0.157102	0.227543	0.319008	0.509999	0.235176	0.193018	0.548455	0.0533384	0.561173	0.580468	0.531631	0.377569	0.385064	0.453872	0.556199	0.449896	0.372568	0.350194	0.275253	0.489895	0.552953	0.567832	0.561351
rs80631554	CACNA2D1	768444	1	10165993	intron-variant	ss537894935	AX-75200225	C/T	0.648969	0.0833532	0.818692	0.45611	0.887402	0.938566	0.0633294	0.8556	0.840267	0.269606	0.0475666	0.197117	0.613737	0.306432	0.474277	0.724932	0.422215	0.544828	0.724985	0.0208073	0.724182	0.894607	0.392475	0.732801	0.767093	0.62701	0.209375	0.164547	0.172427	0.181384	0.225881	0.318789	0.330672	0.451286	0.644704	0.355037	0.453764	0.407496	0.341493	0.316842	0.274649
rs316128809	CACNA2D1	768444	1	10171042	intron-variant	ss538167563	AX-75200330	A/G	0.863233	0.636562	0.276933	0.455757	0.167888	0.75429	0.843733	0.732412	0.700877	0.310655	0.606803	0.421686	0.550247	0.970728	0.977326	0.136599	0.230174	0.406729	0.135828	0.941057	0.30737	0.631031	0.146027	0.380052	0.495366	0.167247	0.204252	0.182516	0.166953	0.111436	0.132371	0.204813	0.263888	0.260332	0.289629	0.166298	0.160175	0.268447	0.273424	0.270728	0.244822
rs318223155	CACNA2D1	768444	1	10172470	intron-variant	ss538062202	AX-75200365	A/G	0.594938	0.606059	0.00663451	0.670947	0.528999	0.736646	0.38765	0.708551	0.40131	0.702189	0.0587134	0.692537	0.119419	0.179288	0.028578	0.242686	0.055427	0.209667	0.24265	0.0334969	0.140282	0.730155	0.414001	0.857645	0.641033	0.68886	0.9145	0.742669	0.791495	0.897495	0.765041	0.610319	0.71524	0.874683	0.891976	0.833099	0.722053	0.815465	0.927234	0.958162	0.935517
rs312388121	CACNA2D1	768444	1	10178078	intron-variant	ss537803574	AX-75200481	A/G	0.527991	0.0688647	0.0182073	0.500193	0.560967	0.481483	0.209339	0.299492	0.569365	0.264255	0.0821848	0.49074	0.254458	0.297388	0.849527	0.832578	0.9562	0.884236	0.832505	0.540578	0.482274	0.310103	0.236396	0.363076	0.404536	0.591805	0.120285	0.140299	0.143381	0.142538	0.217515	0.368309	0.39972	0.290354	0.626118	0.239911	0.26019	0.267131	0.247704	0.220299	0.173723
rs13833948	CACNA2D1	768444	1	10182176	intron-variant	ss537973670	AX-80927236	C/G	0.308987	0.645877	0.116244	0.795668	0.398683	0.765366	0.981692	0.57169	0.833463	0.0225937	0.202915	0.0850643	0.733036	0.50502	0.526781	0.329126	0.673722	0.289855	0.330609	0.626454	0.0642261	0.173971	0.00192431	0.0668962	0.527572	0.215362	0.447895	0.525643	0.556944	0.711114	0.678829	0.551739	0.537647	0.472788	0.616878	0.725278	0.785588	0.599402	0.584924	0.5615	0.527894
rs80767195	CACNA2D1	768444	1	10183336	intron-variant	ss537949146	AX-75200588	A/G	0.224136	0.120028	0.0168937	0.80053	0.341166	0.840016	0.123452	0.597166	0.592159	0.714092	0.984477	0.598122	0.295906	0.138565	0.753706	0.692283	0.852182	0.88204	0.692183	0.743759	0.291613	0.99641	0.0326785	0.704382	0.635535	0.636974	0.636705	0.677455	0.689011	0.614936	0.76548	0.962604	0.976229	0.851007	0.872344	0.647463	0.67944	0.640437	0.597204	0.565162	0.542802
rs314580825	CACNA2D1	768444	1	10185044	intron-variant	ss538051131	AX-75200624	C/T	0.222778	0.462321	0.00072897	0.275131	0.47693	0.58792	0.434077	0.590307	0.324957	0.924573	0.0240481	0.904363	0.211878	0.274389	0.116006	0.30956	0.167387	0.51302	0.309495	0.0332264	0.299568	0.906417	0.0215412	0.914976	0.660963	0.92535	0.500559	0.357109	0.378143	0.427548	0.324043	0.237911	0.299203	0.58391	0.434896	0.646984	0.797086	0.743205	0.664189	0.651012	0.564597
rs316348103	CACNA2D1	768444	1	10186798	intron-variant	ss537916550	AX-75200655	A/G	0.41315	0.965766	0.143252	0.556848	0.745345	0.906752	0.0932312	0.4581	0.729949	0.00646867	0.0337414	0.045904	0.653635	0.740454	0.159094	0.413884	0.83724	0.0908767	0.415731	0.478644	0.00627169	0.0921135	0.00160353	0.0243517	0.515571	0.0640739	0.218944	0.253501	0.293016	0.361831	0.358814	0.357081	0.342788	0.314516	0.506038	0.419993	0.551232	0.340381	0.283577	0.246768	0.191008
rs13818434	CACNA2D1	768444	1	10193350	intron-variant	ss538107568	AX-75200811	A/G	0.409684	0.378217	0.114486	0.496558	0.370393	0.865781	0.988406	0.982601	0.885274	0.145457	0.875963	0.252664	0.584306	0.613972	0.712275	0.230154	0.418267	0.352213	0.231327	0.833178	0.0297639	0.509277	0.00863035	0.259584	0.472887	0.27419	0.743818	0.682269	0.648354	0.533315	0.610675	0.797876	0.907699	0.901443	0.955595	0.687759	0.649048	0.876322	0.889091	0.892448	0.84622
rs316427982	CACNA2D1	768444	1	10194276	intron-variant	ss538100135	AX-75200836	C/T	0.613492	0.157502	0.916218	0.499169	0.533298	0.816006	0.012919	0.832276	0.83307	0.693714	0.0837901	0.550798	0.829214	0.342508	0.298656	0.680225	0.300642	0.416914	0.680266	0.0146586	0.647645	0.907764	0.506418	0.691658	0.747277	0.482529	0.30216	0.254336	0.273223	0.249289	0.29185	0.433993	0.439885	0.542062	0.714702	0.395587	0.51009	0.439164	0.356705	0.32368	0.26421
rs317528277	CACNA2D1	768444	1	10197694	intron-variant	ss537866029	AX-75200912	C/T	0.41315	0.965766	0.143252	0.556848	0.745345	0.906752	0.0862691	0.4581	0.729949	0.00646867	0.0330589	0.045904	0.653635	0.740454	0.159094	0.413884	0.83724	0.0908767	0.415731	0.478644	0.00627169	0.0921135	0.00160353	0.0243517	0.563473	0.0640739	0.220683	0.255669	0.295651	0.366368	0.362947	0.362548	0.34928	0.322751	0.517774	0.432279	0.56731	0.351578	0.292135	0.255607	0.198513
rs316844812	CACNA2D1	768444	1	10199436	intron-variant	ss537820633	AX-75200950	A/G	0.326209	0.51558	0.172712	0.842386	0.552432	0.827383	0.827891	0.574172	0.838763	0.00869201	0.324305	0.0378876	0.6171	0.461541	0.449955	0.350562	0.748777	0.263777	0.352074	0.61092	0.0265502	0.146136	0.0016292	0.0709135	0.509974	0.193659	0.589389	0.691302	0.733133	0.858398	0.808594	0.691905	0.670703	0.572357	0.694419	0.811797	0.874764	0.674208	0.654516	0.627513	0.583382
rs315527127	CACNA2D1	768444	1	10203124	intron-variant	ss537736631	AX-75201063	A/G	0.236496	0.239512	0.0115984	0.927493	0.496798	0.374751	0.307093	0.870728	0.191357	0.475566	0.150047	0.521265	0.16442	0.0460753	0.0389906	0.169048	0.0562324	0.444345	0.16611	0.100156	0.248027	0.153814	0.0218923	0.774855	0.411801	0.809467	0.222415	0.195812	0.216646	0.187949	0.130241	0.1014	0.136755	0.220453	0.139247	0.237851	0.317599	0.267203	0.21543	0.193448	0.147839
rs15202693	CACNA2D1	768444	1	10205272	intron-variant	ss537874702	AX-75201117	A/G	0.307128	0.489944	0.168299	0.840089	0.542345	0.846318	0.807153	0.547052	0.8782	0.00935555	0.371663	0.0401363	0.618408	0.462029	0.456879	0.355941	0.748242	0.271884	0.357466	0.62935	0.027987	0.141455	0.00145538	0.0704716	0.498388	0.210699	0.625822	0.730972	0.774412	0.90274	0.850745	0.731088	0.706233	0.601594	0.722546	0.837627	0.902214	0.696543	0.676142	0.649149	0.604759
rs316880976	CACNA2D1	768444	1	10209068	intron-variant	ss537861369	AX-75201207	C/T	0.326209	0.51558	0.172712	0.842386	0.552432	0.827383	0.769794	0.574172	0.838763	0.00869201	0.366411	0.0378876	0.6171	0.461541	0.449955	0.350562	0.748777	0.263777	0.352074	0.61092	0.0265502	0.146136	0.0016292	0.0709135	0.489768	0.193659	0.596317	0.699313	0.742867	0.870585	0.820547	0.702466	0.678584	0.576376	0.694984	0.80614	0.868935	0.666987	0.646599	0.618423	0.572461
rs80670472	CACNA2D1	768444	1	10212342	intron-variant	ss537810344	AX-80890291	C/G	0.478915	0.427899	0.0849723	0.492333	0.349384	0.980971	0.904799	0.923933	0.935694	0.223829	0.85998	0.325284	0.504264	0.608197	0.834514	0.253382	0.366984	0.479932	0.254616	0.919963	0.0509232	0.673833	0.0140537	0.329226	0.349571	0.33185	0.628306	0.568664	0.534798	0.431649	0.502343	0.672107	0.755378	0.755184	0.800965	0.549325	0.504831	0.717717	0.732724	0.735661	0.701258
rs316366440	CACNA2D1	768444	1	10213163	intron-variant	ss537945955	AX-80808550	C/G	0.519587	0.63347	0.139595	0.271848	0.24328	0.651617	0.112828	0.716007	0.961206	0.0205581	0.0218571	0.101698	0.903446	0.671527	0.408969	0.208664	0.694555	0.125531	0.207511	0.492787	0.152958	0.429728	0.00507042	0.041713	0.721155	0.0349513	0.420862	0.438019	0.48673	0.651702	0.673268	0.665713	0.626041	0.626811	0.937013	0.789384	0.94784	0.681019	0.61094	0.571025	0.493045
rs315850324	CACNA2D1	768444	1	10215302	intron-variant	ss537774818	AX-75201346	C/T	0.589632	0.691659	0.0864768	0.244097	0.0880202	0.783133	0.702314	0.64772	0.795315	0.397923	0.93719	0.514056	0.723965	0.844032	0.750031	0.119538	0.144144	0.561446	0.118843	0.924298	0.460031	0.680464	0.0373877	0.450947	0.50059	0.234785	0.367739	0.354088	0.336401	0.225207	0.259302	0.386239	0.469723	0.437988	0.445779	0.280517	0.259568	0.394135	0.39184	0.381383	0.341413
rs13833941	CACNA2D1	768444	1	10216886	intron-variant	ss538215112	AX-75201381	A/G	0.613492	0.157502	0.916218	0.499169	0.533298	0.816006	0.017604	0.832276	0.83307	0.693714	0.098817	0.550798	0.829214	0.342508	0.298656	0.680225	0.300642	0.416914	0.680266	0.0146586	0.647645	0.907764	0.506418	0.691658	0.796167	0.482529	0.314769	0.266458	0.286827	0.261559	0.306905	0.451435	0.458317	0.561766	0.733833	0.409151	0.526312	0.455807	0.370371	0.335538	0.275724
rs314473076	CACNA2D1	768444	1	10218858	intron-variant	ss538199899	AX-75201427	C/T	0.326209	0.51558	0.172712	0.842386	0.552432	0.827383	0.704096	0.574172	0.838763	0.00869201	0.358351	0.0378876	0.6171	0.461541	0.449955	0.350562	0.748777	0.263777	0.352074	0.61092	0.0265502	0.146136	0.0016292	0.0709135	0.576374	0.193659	0.694369	0.806185	0.851943	0.976857	0.924155	0.799988	0.772059	0.65739	0.777591	0.894752	0.958879	0.747144	0.721303	0.691049	0.64067
rs313987777	CACNA2D1	768444	1	10219608	intron-variant	ss538116731	AX-75201444	G/T	0.519587	0.63347	0.139595	0.271848	0.24328	0.651617	0.155624	0.716007	0.961206	0.0205581	0.0234405	0.101698	0.903446	0.671527	0.408969	0.208664	0.694555	0.125531	0.207511	0.492787	0.152958	0.429728	0.00507042	0.041713	0.702453	0.0349513	0.51239	0.532514	0.586278	0.761404	0.783005	0.769882	0.734226	0.724302	0.96729	0.884766	0.954716	0.773652	0.6965	0.649138	0.558168
rs315569455	CACNA2D1	768444	1	10219948	intron-variant	ss538261530	AX-75201455	A/C	0.222778	0.462321	0.00072897	0.275131	0.47693	0.58792	0.41116	0.590307	0.324957	0.924573	0.037708	0.904363	0.211878	0.274389	0.116006	0.30956	0.167387	0.51302	0.309495	0.0332264	0.299568	0.906417	0.0215412	0.914976	0.608069	0.92535	0.573007	0.420587	0.44564	0.500664	0.384902	0.287842	0.353128	0.649532	0.486255	0.698476	0.85324	0.790408	0.710051	0.697433	0.609478
rs313134714	CACNA2D1	768444	1	10220530	intron-variant	ss538198149	AX-75201464	A/G	0.222778	0.462321	0.00072897	0.275131	0.47693	0.58792	0.41116	0.590307	0.324957	0.924573	0.037708	0.904363	0.211878	0.274389	0.116006	0.30956	0.167387	0.51302	0.309495	0.0332264	0.299568	0.906417	0.0215412	0.914976	0.608069	0.92535	0.573007	0.420587	0.44564	0.500664	0.384902	0.287842	0.353128	0.649532	0.486255	0.698476	0.85324	0.790408	0.710051	0.697433	0.609478
rs80665070	CACNA2D1	768444	1	10222553	intron-variant	ss538000260	AX-75201524	G/T	0.296515	0.64581	0.174693	0.816932	0.487579	0.854982	0.848974	0.574172	0.755532	0.00431594	0.395926	0.0378876	0.529396	0.358104	0.464295	0.39997	0.779076	0.311787	0.401616	0.583937	0.0172186	0.112477	0.0006171	0.0709135	0.421265	0.235134	0.514436	0.617057	0.663504	0.797392	0.753115	0.64906	0.638046	0.543734	0.65866	0.753655	0.800046	0.593667	0.562337	0.52529	0.479782
rs13833930	CACNA2D1	768444	1	10222711	intron-variant	ss537999999	AX-75201529	A/G	0.326209	0.51558	0.172712	0.842386	0.552432	0.827383	0.748039	0.574172	0.838763	0.00869201	0.385812	0.0378876	0.6171	0.461541	0.449955	0.350562	0.748777	0.263777	0.352074	0.61092	0.0265502	0.146136	0.0016292	0.0709135	0.502389	0.193659	0.552833	0.649088	0.687328	0.806177	0.750077	0.632405	0.603884	0.504302	0.616718	0.726774	0.790449	0.59519	0.579711	0.55589	0.513652
rs313297544	CACNA2D1	768444	1	10227943	intron-variant	ss538199228	AX-75201637	C/T	0.62194	0.928999	0.0689354	0.264046	0.497356	0.878677	0.197713	0.990244	0.839818	0.267451	0.370253	0.462204	0.533568	0.95409	0.427724	0.308529	0.678825	0.225119	0.310048	0.160299	0.0171805	0.602147	0.0211035	0.197483	0.400742	0.14737	0.902693	0.921963	0.98977	0.875796	0.92293	0.995077	0.902828	0.986016	0.944623	0.905402	0.755472	0.927221	0.83599	0.798998	0.777206
rs80615443	CACNA2D1	768444	1	10228448	intron-variant	ss538093307	AX-75201651	C/T	0.943475	0.234616	0.597833	0.836589	0.36202	0.849596	0.035057	0.264171	0.740494	0.068528	0.0224485	0.22112	0.721936	0.766287	0.11689	0.579442	0.118368	0.221999	0.579417	0.425069	0.42536	0.103705	0.558978	0.126198	0.676124	0.294829	0.0632987	0.0644805	0.0717258	0.0801622	0.103727	0.182319	0.221698	0.200557	0.428484	0.173442	0.193419	0.179061	0.140496	0.11409	0.0678217
rs16739531	CACNA2D1	768444	1	10233864	intron-variant	ss537793069	AX-80899071	A/T	0.715234	0.335542	0.0142988	0.178607	0.548265	0.407015	0.704091	0.189335	0.629903	0.121665	0.426936	0.301246	0.228294	0.647408	0.662906	0.651957	0.807482	0.940768	0.651937	0.0294957	0.570693	0.201396	0.522387	0.195801	0.499032	0.733453	0.212895	0.288173	0.272464	0.274343	0.366461	0.472602	0.503834	0.284236	0.582937	0.328047	0.295195	0.363144	0.404914	0.396098	0.367645
rs318092347	CACNA2D1	768444	1	10236443	intron-variant	ss538170892	AX-75201856	A/G	0.224136	0.120028	0.0168937	0.80053	0.341166	0.840016	0.13416	0.597166	0.592159	0.714092	0.94041	0.598122	0.295906	0.138565	0.753706	0.692283	0.852182	0.88204	0.692183	0.743759	0.291613	0.99641	0.0326785	0.704382	0.593603	0.636974	0.578147	0.616173	0.625617	0.552472	0.698899	0.965574	0.907872	0.791697	0.928693	0.604436	0.635481	0.607421	0.566407	0.535206	0.517133
rs13833894	CACNA2D1	768444	1	10239765	intron-variant	ss538279437	AX-75201939	A/G	0.839975	0.432442	0.615748	0.963775	0.505945	0.398917	0.794504	0.62666	0.73158	0.097221	0.074761	0.214784	0.519079	0.518274	0.976356	0.755419	0.971523	0.677801	0.748676	0.342189	0.177149	0.716084	0.567439	0.339704	0.4621	0.398506	0.3841	0.385435	0.378688	0.450557	0.522904	0.606192	0.661176	0.561205	0.870894	0.615869	0.613807	0.680161	0.700567	0.69281	0.605579
rs313070775	CACNA2D1	768444	1	10241362	intron-variant	ss537962304	AX-75201978	A/G	0.478915	0.427899	0.0849723	0.492333	0.349384	0.980971	0.878698	0.923933	0.935694	0.223829	0.919928	0.325284	0.504264	0.608197	0.834514	0.253382	0.366984	0.479932	0.254616	0.919963	0.0509232	0.673833	0.0140537	0.329226	0.410048	0.33185	0.539043	0.483334	0.452275	0.360187	0.423085	0.586484	0.674405	0.685644	0.734553	0.490705	0.449296	0.653316	0.667959	0.671374	0.638756
rs315512666	CACNA2D1	768444	1	10241941	intron-variant	ss537958431	AX-75201998	A/C	0.300145	0.132081	0.733189	0.874462	0.65395	0.345223	0.00927078	0.982206	0.776842	0.71119	0.0189337	0.853814	0.978731	0.857982	0.747065	0.671744	0.518337	0.837269	0.671723	0.26258	0.272062	0.742568	0.252607	0.795029	0.632211	0.441504	0.331646	0.289714	0.309806	0.373001	0.398858	0.533464	0.520524	0.586869	0.752943	0.409867	0.441124	0.381065	0.31176	0.285882	0.236842
rs313110026	CACNA2D1	768444	1	10244295	intron-variant	ss538261329	AX-75202055	C/T	0.478915	0.427899	0.0849723	0.492333	0.349384	0.980971	0.844914	0.923933	0.935694	0.223829	0.802461	0.325284	0.504264	0.608197	0.834514	0.253382	0.366984	0.479932	0.254616	0.919963	0.0509232	0.673833	0.0140537	0.329226	0.366787	0.33185	0.596475	0.536151	0.502726	0.40454	0.470569	0.637518	0.719213	0.719233	0.7657	0.517054	0.478181	0.686853	0.704829	0.711417	0.678911
rs312470059	CACNA2D1	768444	1	10246653	intron-variant	ss538122204	AX-75202100	A/G	0.663173	0.711214	0.178949	0.439756	0.210178	0.326221	0.135934	0.792621	0.977042	0.00885414	0.0118865	0.0452996	0.804631	0.999835	0.711379	0.212115	0.511044	0.263366	0.211013	0.921756	0.105927	0.573554	0.0114771	0.0624374	0.415367	0.0475531	0.489635	0.516266	0.562751	0.819342	0.80991	0.769001	0.712049	0.680497	0.976889	0.844089	0.928306	0.673985	0.615025	0.583685	0.509799
rs312595523	CACNA2D1	768444	1	10249424	intron-variant	ss537763428	AX-75202158	C/T	0.987553	0.352898	0.797531	0.561407	0.386938	0.428325	0.214716	0.486308	0.539408	0.0147273	0.232993	0.0890992	0.57391	0.290351	0.984496	0.0527822	0.230166	0.195793	0.0523467	0.68891	0.0325868	0.430101	0.0848035	0.0215841	0.89892	0.0227111	0.640573	0.758459	0.809503	0.984978	0.907208	0.843779	0.952899	0.845466	0.70719	0.994727	0.910562	0.814514	0.769509	0.72099	0.663267
rs315621231	CACNA2D1	768444	1	10252718	intron-variant	ss538226786	AX-75202245	G/T	0.459149	0.429239	0.00519313	0.647987	0.391998	0.620445	0.457027	0.536512	0.375543	0.440902	0.0178752	0.418946	0.185741	0.0919925	0.533832	0.420534	0.481144	0.968933	0.420422	0.6413	0.640647	0.811634	0.0779605	0.817123	0.191978	0.980259	0.718948	0.592224	0.612307	0.824639	0.646529	0.483702	0.534571	0.764652	0.587077	0.796717	0.798298	0.758011	0.711373	0.713939	0.654936
rs313633636	CACNA2D1	768444	1	10254041	intron-variant	ss537856387	AX-75202281	A/G	0.849906	0.628845	0.427653	0.892617	0.755345	0.453131	0.601673	0.604998	0.721096	0.0195008	0.140894	0.0589759	0.667002	0.568518	0.799606	0.772277	0.85388	0.572441	0.765286	0.281289	0.463959	0.563392	0.428114	0.306825	0.463432	0.304355	0.547221	0.573881	0.576343	0.61375	0.68377	0.8099	0.866186	0.697403	0.997817	0.725334	0.72021	0.781146	0.792035	0.773172	0.654449
rs314032681	CACNA2D1	768444	1	10258082	intron-variant	ss537901492	AX-80917389	C/G	0.632177	0.869431	0.916451	0.65282	0.320526	0.776532	0.639701	0.542698	0.482606	0.0413687	0.854706	0.150283	0.608374	0.383587	0.908049	0.0508829	0.168774	0.273913	0.0504948	0.384537	0.149663	0.390303	0.0399359	0.0579203	0.800355	0.0932426	0.936306	0.787358	0.760978	0.670978	0.610052	0.652138	0.721455	0.924298	0.653844	0.663194	0.614777	0.789242	0.768827	0.784589	0.784887
rs13833887	CACNA2D1	768444	1	10258781	intron-variant	ss537973293	AX-75202406	A/G	0.839975	0.432442	0.615748	0.963775	0.505945	0.398917	0.790783	0.62666	0.73158	0.097221	0.0742349	0.214784	0.519079	0.518274	0.976356	0.755419	0.971523	0.677801	0.748676	0.342189	0.177149	0.716084	0.567439	0.339704	0.470115	0.398506	0.391436	0.392941	0.386281	0.459373	0.532578	0.617618	0.673773	0.574043	0.887293	0.630539	0.628604	0.695312	0.716103	0.708774	0.620425
rs314141009	CACNA2D1	768444	1	10259336	intron-variant	ss537847745	AX-80848943	C/G	0.676877	0.504184	0.0150733	0.596959	0.597356	0.621997	0.414844	0.493219	0.508393	0.324454	0.0210863	0.310467	0.100284	0.0434841	0.521501	0.409285	0.454188	0.99754	0.409196	0.722324	0.72142	0.574106	0.119312	0.875467	0.219399	0.84969	0.71362	0.585208	0.603948	0.817593	0.638339	0.475386	0.522578	0.750615	0.574299	0.782219	0.785926	0.746041	0.702417	0.707419	0.655364
rs13833880	CACNA2D1	768444	1	10263143	intron-variant	ss538277017	AX-75202516	C/T	0.849906	0.628845	0.427653	0.892617	0.755345	0.453131	0.601827	0.604998	0.721096	0.0195008	0.137843	0.0589759	0.667002	0.568518	0.799606	0.772277	0.85388	0.572441	0.765286	0.281289	0.463959	0.563392	0.428114	0.306825	0.437782	0.304355	0.532623	0.559201	0.561492	0.598312	0.667683	0.792701	0.848236	0.679326	0.976685	0.704913	0.699435	0.759889	0.771143	0.752026	0.635347
rs314226506	CACNA2D1	768444	1	10265311	intron-variant	ss537928326	AX-75202566	A/G	0.478915	0.427899	0.0849723	0.492333	0.349384	0.980971	0.865644	0.923933	0.935694	0.223829	0.867646	0.325284	0.504264	0.608197	0.834514	0.253382	0.366984	0.479932	0.254616	0.919963	0.0509232	0.673833	0.0140537	0.329226	0.352805	0.33185	0.581715	0.523457	0.489741	0.390956	0.459327	0.622138	0.698782	0.696046	0.739777	0.491727	0.454091	0.654839	0.672338	0.677327	0.646437
rs317736843	CACNA2D1	768444	1	10265826	intron-variant	ss538130163	AX-75202580	A/C	0.849906	0.628845	0.427653	0.892617	0.755345	0.453131	0.613281	0.604998	0.721096	0.0195008	0.139445	0.0589759	0.667002	0.568518	0.799606	0.772277	0.85388	0.572441	0.765286	0.281289	0.463959	0.563392	0.428114	0.306825	0.438028	0.304355	0.550257	0.577796	0.580259	0.617689	0.688268	0.814147	0.870121	0.699655	0.997841	0.725058	0.719353	0.780258	0.791072	0.771638	0.654115
rs312404121	CACNA2D1	768444	1	10266525	intron-variant	ss538236660	AX-75202600	A/G	0.72595	0.35643	0.0114597	0.676534	0.74068	0.79305	0.968975	0.405082	0.375088	0.158219	0.754209	0.3287	0.220734	0.102977	0.826581	0.437118	0.741027	0.633344	0.432736	0.237722	0.789081	0.533821	0.584559	0.325362	0.152511	0.417534	0.781824	0.892029	0.880347	0.776675	0.954237	0.82104	0.813948	0.885673	0.750669	0.887266	0.881582	0.958656	0.9987	0.980686	0.918814
rs80697718	CACNA2D1	768444	1	10271668	intron-variant	ss537958485	AX-75202717	C/T	0.43853	0.0763995	0.0290037	0.821698	0.813864	0.440334	0.190608	0.447736	0.511056	0.337441	0.157309	0.614859	0.212496	0.117569	0.82826	0.596601	0.907999	0.676164	0.592018	0.628474	0.852492	0.787425	0.244484	0.313346	0.354631	0.32178	0.310805	0.331128	0.331609	0.338564	0.471441	0.706431	0.709324	0.558621	0.984543	0.473991	0.493074	0.514748	0.499062	0.472609	0.405938
rs314250502	CACNA2D1	768444	1	10273626	intron-variant	ss537989543	AX-75202766	G/T	0.478915	0.427899	0.0849723	0.492333	0.349384	0.980971	0.86148	0.923933	0.935694	0.223829	0.865856	0.325284	0.504264	0.608197	0.834514	0.253382	0.366984	0.479932	0.254616	0.919963	0.0509232	0.673833	0.0140537	0.329226	0.332127	0.33185	0.727417	0.665888	0.630594	0.514012	0.588438	0.770266	0.854763	0.848366	0.896214	0.630857	0.589734	0.811198	0.824454	0.824048	0.783444
rs317251632	CACNA2D1	768444	1	10274766	intron-variant	ss538087108	AX-75202804	A/G	0.701021	0.133503	0.556859	0.953122	0.742389	0.208857	0.0639767	0.651772	0.888484	0.10736	0.0035936	0.251722	0.59119	0.518428	0.852536	0.959523	0.716734	0.644445	0.953461	0.805654	0.583609	0.882626	0.912484	0.324406	0.786138	0.251518	0.189591	0.171804	0.177371	0.241646	0.294881	0.419124	0.447636	0.418827	0.740457	0.35462	0.372629	0.376229	0.343135	0.321025	0.245037
rs314385302	CACNA2D1	768444	1	10276655	intron-variant	ss538137205	AX-75202849	C/T	0.439733	0.376521	0.0395709	0.802954	0.173472	0.78701	0.328076	0.295598	0.614962	0.349934	0.0363493	0.26203	0.230313	0.110884	0.532828	0.281213	0.372888	0.842908	0.281137	0.89122	0.595381	0.541976	0.319935	0.343565	0.311252	0.954933	0.905742	0.764312	0.786577	0.990336	0.817833	0.628089	0.679966	0.926056	0.735869	0.966254	0.974466	0.936278	0.891243	0.895704	0.843326
rs312421333	CACNA2D1	768444	1	10278065	intron-variant	ss538093257	AX-75202882	A/G	0.478915	0.427899	0.0849723	0.492333	0.349384	0.980971	0.808303	0.923933	0.935694	0.223829	0.843479	0.325284	0.504264	0.608197	0.834514	0.253382	0.366984	0.479932	0.254616	0.919963	0.0509232	0.673833	0.0140537	0.329226	0.364364	0.33185	0.531403	0.472288	0.439729	0.347451	0.407434	0.563283	0.637903	0.63804	0.683111	0.445784	0.412526	0.609839	0.627314	0.632243	0.601707
rs313064137	CACNA2D1	768444	1	10283554	intron-variant	ss538261844	AX-75203028	C/T	0.478915	0.427899	0.0849723	0.492333	0.349384	0.980971	0.798951	0.923933	0.935694	0.223829	0.868009	0.325284	0.504264	0.608197	0.834514	0.253382	0.366984	0.479932	0.254616	0.919963	0.0509232	0.673833	0.0140537	0.329226	0.353976	0.33185	0.62772	0.567894	0.534321	0.43002	0.500955	0.67422	0.762267	0.766528	0.818349	0.562226	0.521184	0.73275	0.747326	0.751244	0.7111
rs316167934	CACNA2D1	768444	1	10287500	intron-variant	ss538227666	AX-75203129	A/G	0.701021	0.133503	0.556859	0.953122	0.742389	0.208857	0.0639767	0.651772	0.888484	0.10736	0.0035936	0.251722	0.59119	0.518428	0.852536	0.959523	0.716734	0.644445	0.953461	0.805654	0.583609	0.882626	0.912484	0.324406	0.786138	0.251518	0.189591	0.171804	0.177371	0.241646	0.294881	0.419124	0.447636	0.418827	0.740457	0.35462	0.372629	0.376229	0.343135	0.321025	0.245037
rs316675112	CACNA2D1	768444	1	10288047	intron-variant	ss538171935	AX-75203142	C/T	0.868694	0.757377	0.887155	0.558882	0.772931	0.904142	0.377491	0.718954	0.752636	0.255314	0.754902	0.476283	0.985801	0.602132	0.974037	0.112562	0.237031	0.37768	0.113315	0.711769	0.00168697	0.630541	0.22719	0.135359	0.557328	0.119272	0.790416	0.677796	0.626324	0.558268	0.536022	0.555359	0.687949	0.776797	0.62484	0.6712	0.590742	0.885661	0.947516	0.986599	0.961642
rs314007643	CACNA2D1	768444	1	10292257	intron-variant	ss538147303	AX-75203245	C/T	0.690225	0.306492	0.800103	0.283469	0.576823	0.345446	0.147493	0.554614	0.63091	0.0593818	0.00215456	0.192644	0.225628	0.237751	0.379495	0.135343	0.268038	0.932426	0.133655	0.941427	0.0923841	0.214825	0.240739	0.33636	0.644791	0.0363474	0.0319546	0.0244408	0.0271289	0.050377	0.0586367	0.105522	0.0974349	0.10145	0.27048	0.136881	0.126557	0.097905	0.085147	0.076273	0.058308
rs315626708	CACNA2D1	768444	1	10297112	intron-variant	ss538167952	AX-75203348	A/G	0.688743	0.281197	0.780447	0.321355	0.584729	0.386099	0.139946	0.541613	0.676365	0.0556558	0.00257119	0.184696	0.232063	0.242023	0.413245	0.118426	0.267032	0.841468	0.116901	0.871057	0.100078	0.208006	0.220607	0.329599	0.626764	0.0341037	0.0295668	0.0224419	0.0249246	0.046696	0.0545285	0.098879	0.0908319	0.0944644	0.255452	0.127415	0.117195	0.0904821	0.078859	0.0708875	0.0545082
rs313457388	CACNA2D1	768444	1	10304187	intron-variant	ss538177780	AX-75203520	A/G	0.78741	0.862645	0.574349	0.504324	0.63301	0.748592	0.962839	0.0901646	0.174526	0.0340939	0.287199	0.0982046	0.666145	0.868325	0.257268	0.612984	0.882626	0.114625	0.610651	0.207564	0.802972	0.904008	0.3236	0.0552382	0.971692	0.467768	0.148473	0.0850784	0.0824299	0.0903105	0.070967	0.0888062	0.0940382	0.197978	0.140467	0.182941	0.140378	0.171011	0.159475	0.161519	0.173555
rs314157674	CACNA2D1	768444	1	10305603	intron-variant	ss537757594	AX-75203558	G/T	0.849632	0.545145	0.97792	0.20378	0.978118	0.620086	0.149621	0.247193	0.408317	0.403991	0.0283635	0.595108	0.350919	0.390307	0.298537	0.139408	0.188572	0.805052	0.139386	0.345762	0.00114367	0.264622	0.445505	0.74545	0.920946	0.0583694	0.0788965	0.0616395	0.0723537	0.101167	0.102769	0.162098	0.135805	0.183119	0.299972	0.2163	0.212018	0.134648	0.104707	0.089415	0.0699236
rs312420674	CACNA2D1	768444	1	10309312	intron-variant	ss537827089	AX-80855728	A/T	0.749506	0.572687	0.716783	0.891157	0.735866	0.666083	0.459924	0.532956	0.613482	0.0380801	0.199199	0.0912756	0.58453	0.429306	0.542576	0.907196	0.580945	0.402287	0.900068	0.241041	0.438051	0.697534	0.340343	0.399728	0.444075	0.508964	0.640423	0.662279	0.658606	0.689885	0.758395	0.881812	0.925786	0.741888	0.958649	0.766679	0.76678	0.835648	0.851764	0.835044	0.717099
rs313252508	CACNA2D1	768444	1	10319807	intron-variant	ss538211554	AX-75203866	C/T	0.690225	0.306492	0.800103	0.283469	0.576823	0.345446	0.13617	0.554614	0.63091	0.0593818	0.00203183	0.192644	0.225628	0.237751	0.379495	0.135343	0.268038	0.932426	0.133655	0.941427	0.0923841	0.214825	0.240739	0.33636	0.603704	0.0363474	0.0300268	0.0228181	0.025347	0.0476574	0.0560716	0.0968819	0.0925884	0.0966102	0.262387	0.131402	0.120726	0.0929936	0.0804819	0.0717036	0.0546873
rs316018216	CACNA2D1	768444	1	10322560	intron-variant	ss537970428	AX-80923169	A/T	0.683753	0.211372	0.405239	0.988147	0.985965	0.238705	0.0403756	0.636308	0.884483	0.0301784	0.015035	0.0921597	0.732076	0.567913	0.704828	0.980344	0.620797	0.558259	0.974172	0.763035	0.998779	0.747401	0.958032	0.301755	0.700265	0.193491	0.31809	0.306356	0.322257	0.378284	0.439066	0.610872	0.63966	0.566822	0.894042	0.46673	0.488947	0.485929	0.437305	0.402265	0.30673
rs316802647	CACNA2D1	768444	1	10326503	intron-variant	ss538026621	AX-75204028	A/G	0.572038	0.821364	0.555956	0.367321	0.545694	0.642057	0.520799	0.209049	0.816842	0.00552279	0.0535032	0.0302326	0.793341	0.653982	0.286768	0.736685	0.288704	0.407163	0.73661	0.253941	0.541598	0.043769	0.161342	0.103819	0.666384	0.480553	0.0843763	0.105314	0.108548	0.11013	0.130531	0.174946	0.222515	0.139912	0.284915	0.160779	0.167426	0.184621	0.178643	0.159769	0.10886
rs316809127	CACNA2D1	768444	1	10329316	intron-variant	ss538171199	AX-80763636	C/G	0.572038	0.821364	0.555956	0.367321	0.545694	0.642057	0.528665	0.209049	0.816842	0.00552279	0.0546917	0.0302326	0.793341	0.653982	0.286768	0.736685	0.288704	0.407163	0.73661	0.253941	0.541598	0.043769	0.161342	0.103819	0.678045	0.480553	0.0795192	0.0994829	0.102578	0.104033	0.123587	0.166267	0.212511	0.132929	0.273408	0.153103	0.159351	0.176001	0.170198	0.151767	0.103008
rs13833841	CACNA2D1	768444	1	10331583	intron-variant	ss538282356	AX-80950903	A/T	0.535112	0.530114	0.799734	0.542125	0.774474	0.516487	0.101785	0.829775	0.333278	0.0123721	0.00279137	0.0701728	0.332422	0.628968	0.771261	0.256937	0.589469	0.772052	0.256935	0.908602	0.00125724	0.0215662	0.0904813	0.192673	0.792151	0.0462206	0.0074513	0.00648976	0.00776362	0.012666	0.0140518	0.0300835	0.0288905	0.0263094	0.0868467	0.0384563	0.0363911	0.0241695	0.0186254	0.0148925	0.0098775
rs312350708	CACNA2D1	768444	1	10348074	intron-variant	ss538249766	AX-75204555	C/T	0.290899	0.742234	0.729444	0.132168	0.675854	0.881458	0.853529	0.15491	0.363432	0.428737	0.353876	0.618949	0.255478	0.335392	0.128399	0.0324702	0.037576	0.660087	0.0324607	0.671355	0.00146688	0.0999021	0.0586763	0.869679	0.72197	0.090227	0.0985763	0.0813391	0.0887643	0.124488	0.110051	0.13593	0.105181	0.128159	0.187082	0.261294	0.215456	0.146305	0.141195	0.13557	0.146408
rs316631522	CACNA2D1	768444	1	10350938	intron-variant	ss538231431	AX-75204629	G/T	0.572038	0.821364	0.555956	0.367321	0.545694	0.642057	0.547371	0.209049	0.816842	0.00552279	0.0720821	0.0302326	0.793341	0.653982	0.286768	0.736685	0.288704	0.407163	0.73661	0.253941	0.541598	0.043769	0.161342	0.103819	0.714306	0.480553	0.110432	0.136128	0.138727	0.139284	0.161626	0.211441	0.260727	0.161414	0.31507	0.181219	0.189396	0.210138	0.204692	0.185771	0.131349
rs317239619	CACNA2D1	768444	1	10355529	intron-variant	ss538205527	AX-75204746	C/T	0.898365	0.57485	0.733422	0.496354	0.530003	0.8226	0.39284	0.761913	0.73698	0.504262	0.798328	0.80976	0.812332	0.509364	0.863603	0.0877015	0.180581	0.390059	0.0883412	0.673365	0.00703792	0.724888	0.281402	0.144693	0.480958	0.14003	0.93811	0.962234	0.911923	0.768031	0.725669	0.760972	0.908368	0.965559	0.7493	0.820763	0.729914	0.95294	0.900155	0.871436	0.909366
rs315644899	CACNA2D1	768444	1	10361593	intron-variant	ss538289233	AX-75204882	A/G	0.898365	0.57485	0.733422	0.496354	0.530003	0.8226	0.358176	0.761913	0.73698	0.504262	0.759126	0.80976	0.812332	0.509364	0.863603	0.0877015	0.180581	0.390059	0.0883412	0.673365	0.00703792	0.724888	0.281402	0.144693	0.513541	0.14003	0.930855	0.97442	0.928539	0.790776	0.751793	0.789107	0.939256	0.99647	0.777279	0.84836	0.752949	0.933093	0.885504	0.860811	0.902227
rs13833828	CACNA2D1	768444	1	10363779	intron-variant	ss537852324	AX-75204928	C/T	0.898365	0.57485	0.733422	0.496354	0.530003	0.8226	0.404057	0.761913	0.73698	0.504262	0.61329	0.80976	0.812332	0.509364	0.863603	0.0877015	0.180581	0.390059	0.0883412	0.673365	0.00703792	0.724888	0.281402	0.144693	0.51294	0.14003	0.893133	0.991567	0.958155	0.811848	0.768985	0.805303	0.95476	0.987391	0.792187	0.865787	0.771582	0.911447	0.862873	0.834994	0.875179
rs315821319	CACNA2D1	768444	1	10369290	intron-variant	ss538172471	AX-75205076	C/T	0.572038	0.821364	0.555956	0.367321	0.545694	0.642057	0.528665	0.209049	0.816842	0.00552279	0.0546917	0.0302326	0.793341	0.653982	0.286768	0.736685	0.288704	0.407163	0.73661	0.253941	0.541598	0.043769	0.161342	0.103819	0.678045	0.480553	0.0795192	0.0994829	0.102578	0.104033	0.123587	0.166267	0.212511	0.132929	0.273408	0.153103	0.159351	0.176001	0.170198	0.151767	0.103008
rs314037241	CACNA2D1	768444	1	10371177	intron-variant	ss538202873	AX-75205119	A/G	0.791226	0.668346	0.709209	0.532362	0.436228	0.672582	0.766339	0.0812046	0.159656	0.0848218	0.479025	0.21176	0.803129	0.786926	0.315852	0.583716	0.967886	0.126008	0.581347	0.208934	0.449298	0.780769	0.382621	0.0494021	0.885239	0.521873	0.252255	0.157582	0.155077	0.146781	0.111023	0.142684	0.15048	0.282752	0.188312	0.254283	0.199443	0.237788	0.219845	0.221611	0.232301
rs80577725	CACNA2D1	768444	1	10374193	intron-variant	ss537839995	AX-75205197	A/G	0.849906	0.628845	0.427653	0.892617	0.755345	0.453131	0.59844	0.604998	0.721096	0.0195008	0.139793	0.0589759	0.667002	0.568518	0.799606	0.772277	0.85388	0.572441	0.765286	0.281289	0.463959	0.563392	0.428114	0.306825	0.438723	0.304355	0.510779	0.535829	0.537988	0.575419	0.644136	0.768188	0.823725	0.656902	0.953029	0.682561	0.675657	0.736431	0.749481	0.731605	0.617292
rs317092683	CACNA2D1	768444	1	10375965	intron-variant	ss537761502	AX-75205234	C/T	0.849906	0.628845	0.427653	0.892617	0.755345	0.453131	0.601827	0.604998	0.721096	0.0195008	0.137843	0.0589759	0.667002	0.568518	0.799606	0.772277	0.85388	0.572441	0.765286	0.281289	0.463959	0.563392	0.428114	0.306825	0.437782	0.304355	0.532623	0.559201	0.561492	0.598312	0.667683	0.792701	0.848236	0.679326	0.976685	0.704913	0.699435	0.759889	0.771143	0.752026	0.635347
rs317905221	CACNA2D1	768444	1	10381828	intron-variant	ss537770432	AX-75205346	A/G	0.849906	0.628845	0.427653	0.892617	0.755345	0.453131	0.607456	0.604998	0.721096	0.0195008	0.138896	0.0589759	0.667002	0.568518	0.799606	0.772277	0.85388	0.572441	0.765286	0.281289	0.463959	0.563392	0.428114	0.306825	0.425962	0.304355	0.538615	0.564589	0.566095	0.602729	0.671352	0.796518	0.850396	0.680328	0.978062	0.705971	0.70116	0.762565	0.774716	0.756823	0.639765
rs316696286	CACNA2D1	768444	1	10382358	intron-variant	ss537871801	AX-75205355	A/G	0.791226	0.668346	0.709209	0.532362	0.436228	0.672582	0.837724	0.0812046	0.159656	0.0848218	0.442856	0.21176	0.803129	0.786926	0.315852	0.583716	0.967886	0.126008	0.581347	0.208934	0.449298	0.780769	0.382621	0.0494021	0.930973	0.521873	0.177408	0.106919	0.106679	0.102661	0.0780075	0.103601	0.110758	0.220309	0.144172	0.195903	0.147586	0.17777	0.162977	0.162975	0.172199
rs317935250	CACNA2D1	768444	1	10387008	intron-variant	ss537757591	AX-75205448	A/C	0.791226	0.668346	0.709209	0.532362	0.436228	0.672582	0.822817	0.0812046	0.159656	0.0848218	0.516252	0.21176	0.803129	0.786926	0.315852	0.583716	0.967886	0.126008	0.581347	0.208934	0.449298	0.780769	0.382621	0.0494021	0.921073	0.521873	0.185499	0.111831	0.110617	0.105209	0.0791824	0.103959	0.110254	0.218752	0.140556	0.19294	0.14545	0.178168	0.164184	0.164894	0.178321
rs316141999	CACNA2D1	768444	1	10390837	intron-variant	ss538043157	AX-75205524	A/G	0.791226	0.668346	0.709209	0.532362	0.436228	0.672582	0.846406	0.0812046	0.159656	0.0848218	0.434442	0.21176	0.803129	0.786926	0.315852	0.583716	0.967886	0.126008	0.581347	0.208934	0.449298	0.780769	0.382621	0.0494021	0.930726	0.521873	0.208832	0.130152	0.130346	0.125668	0.0956745	0.125261	0.131912	0.252153	0.163648	0.220831	0.168754	0.199361	0.179173	0.17801	0.184876
rs317889103	CACNA2D1	768444	1	10392965	intron-variant	ss538063086	AX-75205568	C/T	0.791226	0.668346	0.709209	0.532362	0.436228	0.672582	0.941339	0.0812046	0.159656	0.0848218	0.537094	0.21176	0.803129	0.786926	0.315852	0.583716	0.967886	0.126008	0.581347	0.208934	0.449298	0.780769	0.382621	0.0494021	0.759408	0.521873	0.226439	0.141081	0.139585	0.134854	0.10226	0.132962	0.138748	0.261449	0.171779	0.231496	0.181151	0.217166	0.200993	0.204408	0.217012
rs315256133	CACNA2D1	768444	1	10397087	intron-variant	ss538034720	AX-75205653	C/T	0.791226	0.668346	0.709209	0.532362	0.436228	0.672582	0.856407	0.0812046	0.159656	0.0848218	0.518626	0.21176	0.803129	0.786926	0.315852	0.583716	0.967886	0.126008	0.581347	0.208934	0.449298	0.780769	0.382621	0.0494021	0.904391	0.521873	0.243736	0.152572	0.151214	0.143319	0.109555	0.139453	0.144717	0.269545	0.176132	0.237754	0.185812	0.223945	0.205989	0.206599	0.217669
rs317595295	CACNA2D1	768444	1	10398770	intron-variant	ss538049954	AX-80869655	A/T	0.791226	0.668346	0.709209	0.532362	0.436228	0.672582	0.811253	0.0812046	0.159656	0.0848218	0.490866	0.21176	0.803129	0.786926	0.315852	0.583716	0.967886	0.126008	0.581347	0.208934	0.449298	0.780769	0.382621	0.0494021	0.922136	0.521873	0.214454	0.132898	0.131887	0.125718	0.0954694	0.12389	0.130066	0.248035	0.16113	0.218768	0.168384	0.2021	0.184603	0.184011	0.193624
rs315215085	HGF	395941	1	10469914	upstream-variant-2KB	ss537924593	AX-75207228	C/T	0.791226	0.668346	0.709209	0.532362	0.436228	0.672582	0.82708	0.0812046	0.159656	0.0848218	0.490866	0.21176	0.803129	0.786926	0.315852	0.583716	0.967886	0.126008	0.581347	0.208934	0.449298	0.780769	0.382621	0.0494021	0.922136	0.521873	0.214454	0.132898	0.131887	0.125718	0.0954694	0.12389	0.130066	0.248035	0.16113	0.218768	0.168384	0.2021	0.184603	0.184011	0.193624
rs14796775	HGF	395941	1	10472516	intron-variant	ss537847277	AX-75207285	A/G	0.791226	0.668346	0.709209	0.532362	0.436228	0.672582	0.846381	0.0812046	0.159656	0.0848218	0.439115	0.21176	0.803129	0.786926	0.315852	0.583716	0.967886	0.126008	0.581347	0.208934	0.449298	0.780769	0.382621	0.0494021	0.869142	0.521873	0.19419	0.118937	0.118724	0.113362	0.0863227	0.112802	0.118611	0.231128	0.149047	0.203057	0.155908	0.187046	0.169838	0.16849	0.177228
rs316775455	HGF	395941	1	10472779	intron-variant	ss537762993	AX-75207294	A/C	0.911842	0.60513	0.0734978	0.921792	0.429664	0.942353	0.948777	0.344715	0.681703	0.397995	0.34842	0.674966	0.148268	0.254224	0.178973	0.721123	0.574636	0.315164	0.718545	0.874491	0.807093	0.471049	0.103299	0.187358	0.171426	0.889131	0.222399	0.170376	0.167117	0.153355	0.181059	0.32945	0.348652	0.384854	0.504721	0.358512	0.276231	0.35978	0.354897	0.340744	0.3131
rs15202548	HGF	395941	1	10475569	intron-variant	ss537981448	AX-75207360	C/T	0.911842	0.60513	0.0734978	0.921792	0.429664	0.942353	0.943565	0.344715	0.681703	0.397995	0.354269	0.674966	0.148268	0.254224	0.178973	0.721123	0.574636	0.315164	0.718545	0.874491	0.807093	0.471049	0.103299	0.187358	0.221394	0.889131	0.209042	0.160128	0.158062	0.145884	0.171927	0.314182	0.336429	0.37253	0.491193	0.351995	0.271833	0.358407	0.354531	0.342005	0.320663
rs315647780	HGF	395941	1	10479303	intron-variant	ss537847676	AX-75207438	A/G	0.998195	0.603339	0.152685	0.810868	0.447943	0.803743	0.975742	0.489065	0.598009	0.376308	0.364243	0.603612	0.172687	0.232073	0.119242	0.583457	0.405618	0.26633	0.581065	0.754424	0.879443	0.359283	0.200704	0.285097	0.256528	0.835928	0.202863	0.154515	0.150648	0.137695	0.162262	0.298037	0.312601	0.339841	0.444623	0.312572	0.238633	0.31777	0.314053	0.301452	0.280722
rs312446594	HGF	395941	1	10482600	intron-variant	ss537887704	AX-75207503	A/G	0.911842	0.60513	0.0734978	0.921792	0.429664	0.942353	0.929484	0.344715	0.681703	0.397995	0.345499	0.674966	0.148268	0.254224	0.178973	0.721123	0.574636	0.315164	0.718545	0.874491	0.807093	0.471049	0.103299	0.187358	0.198045	0.889131	0.197767	0.150481	0.147715	0.134879	0.160093	0.296657	0.316026	0.348901	0.462826	0.325661	0.249729	0.328897	0.326283	0.314119	0.290417
rs15202515	HGF	395941	1	10485035	intron-variant	ss538133680	AX-75207554	A/G	0.456485	0.394	0.017349	0.55015	0.677797	0.921035	0.484839	0.627837	0.332687	0.148181	0.25354	0.347567	0.180987	0.131591	0.386189	0.313067	0.327973	0.956814	0.312962	0.683065	0.51184	0.950105	0.0442234	0.762148	0.30783	0.683172	0.561583	0.472695	0.473456	0.539512	0.390086	0.292678	0.307857	0.400445	0.267192	0.406212	0.422073	0.406986	0.387013	0.408373	0.401271
rs317334080	HGF	395941	1	10486778	intron-variant	ss538175540	AX-75207591	A/G	0.911842	0.60513	0.0734978	0.921792	0.429664	0.942353	0.87912	0.344715	0.681703	0.397995	0.356569	0.674966	0.148268	0.254224	0.178973	0.721123	0.574636	0.315164	0.718545	0.874491	0.807093	0.471049	0.103299	0.187358	0.176859	0.889131	0.200976	0.152304	0.148923	0.135488	0.160032	0.294877	0.315532	0.349897	0.463741	0.327868	0.251427	0.332648	0.329225	0.316172	0.291905
rs317356740	HGF	395941	1	10486905	intron-variant	ss538211533	AX-75207597	A/G	0.572038	0.821364	0.555956	0.367321	0.545694	0.642057	0.547371	0.209049	0.816842	0.00552279	0.0720821	0.0302326	0.793341	0.653982	0.286768	0.736685	0.288704	0.407163	0.73661	0.253941	0.541598	0.043769	0.161342	0.103819	0.714306	0.480553	0.110432	0.136128	0.138727	0.139284	0.161626	0.211441	0.260727	0.161414	0.31507	0.181219	0.189396	0.210138	0.204692	0.185771	0.131349
rs312735372	HGF	395941	1	10490965	intron-variant	ss537981667	AX-75207688	A/C	0.858993	0.407095	0.0223135	0.265147	0.448626	0.798468	0.969412	0.198898	0.553025	0.348518	0.717374	0.394271	0.231528	0.413578	0.932007	0.584312	0.995863	0.524471	0.584245	0.264463	0.939713	0.136765	0.560679	0.351149	0.306591	0.857264	0.322377	0.411261	0.411707	0.431012	0.576957	0.753024	0.800582	0.553102	0.944123	0.61782	0.536639	0.58308	0.597825	0.559719	0.486297
rs313041155	HGF	395941	1	10493596	intron-variant	ss538289782	AX-75207739	A/G	0.962894	0.829265	0.87531	0.247347	0.871021	0.872976	0.860226	0.022455	0.303852	0.0702586	0.561112	0.20495	0.737316	0.659768	0.115972	0.905716	0.538297	0.0859192	0.908669	0.176024	0.841815	0.55044	0.218323	0.0184618	0.726026	0.745971	0.55945	0.366066	0.357255	0.367901	0.305685	0.384908	0.362145	0.587563	0.429912	0.515401	0.405698	0.474106	0.455448	0.470547	0.504726
rs316025335	HGF	395941	1	10496752	intron-variant	ss538244778	AX-75207813	C/T	0.675992	0.730598	0.191464	0.554713	0.699155	0.847624	0.828221	0.117361	0.804808	0.0213569	0.786176	0.114832	0.270415	0.19544	0.067713	0.607453	0.26815	0.166966	0.605209	0.375579	0.57352	0.649243	0.0223221	0.0337524	0.35657	0.600642	0.770117	0.621422	0.609757	0.586318	0.616243	0.804342	0.765079	0.929015	0.894289	0.861141	0.716562	0.805311	0.80089	0.802931	0.849426
rs315708286	HGF	395941	1	10497844	intron-variant	ss538229541	AX-75207835	A/C	0.675992	0.730598	0.191464	0.554713	0.699155	0.847624	0.806404	0.117361	0.804808	0.0213569	0.836859	0.114832	0.270415	0.19544	0.067713	0.607453	0.26815	0.166966	0.605209	0.375579	0.57352	0.649243	0.0223221	0.0337524	0.330184	0.600642	0.663004	0.520008	0.508325	0.489284	0.521812	0.701408	0.666363	0.829741	0.799402	0.761319	0.621954	0.711631	0.71193	0.715209	0.757351
rs313595135	HGF	395941	1	10498130	intron-variant	ss538198458	AX-75207841	C/T	0.675992	0.730598	0.191464	0.554713	0.699155	0.847624	0.81572	0.117361	0.804808	0.0213569	0.781806	0.114832	0.270415	0.19544	0.067713	0.607453	0.26815	0.166966	0.605209	0.375579	0.57352	0.649243	0.0223221	0.0337524	0.357279	0.600642	0.747811	0.600596	0.589448	0.567073	0.59751	0.783442	0.744107	0.907305	0.872164	0.836726	0.692801	0.782067	0.777098	0.777555	0.821382
rs316213563	HGF	395941	1	10498661	intron-variant	ss538210424	AX-75207853	C/T	0.970155	0.687865	0.813548	0.302282	0.703662	0.851209	0.998411	0.0381344	0.315137	0.0308461	0.580544	0.104624	0.92567	0.836882	0.148068	0.964503	0.577877	0.119948	0.967553	0.23373	0.533534	0.460124	0.259465	0.0176166	0.691441	0.450629	0.616872	0.412654	0.403702	0.414777	0.345925	0.433565	0.411423	0.654679	0.49353	0.590871	0.478799	0.550698	0.532551	0.551065	0.593512
rs318087712	HGF	395941	1	10504535	intron-variant	ss538149684	AX-75207992	C/T	0.911842	0.60513	0.0734978	0.921792	0.429664	0.942353	0.864219	0.344715	0.681703	0.397995	0.338066	0.674966	0.165152	0.25504	0.178973	0.721123	0.574636	0.315164	0.718545	0.794334	0.807093	0.471049	0.103299	0.187358	0.19298	0.889131	0.172574	0.130871	0.128934	0.119752	0.145656	0.279055	0.289765	0.315415	0.421407	0.286471	0.209325	0.278395	0.271662	0.256504	0.235116
rs80569168	HGF	395941	1	10506843	intron-variant	ss538047912	AX-75208032	C/T	0.911842	0.60513	0.0734978	0.921792	0.429664	0.942353	0.842884	0.344715	0.681703	0.397995	0.338066	0.674966	0.165152	0.25504	0.178973	0.721123	0.574636	0.315164	0.718545	0.794334	0.807093	0.471049	0.103299	0.187358	0.211277	0.889131	0.176504	0.133594	0.131134	0.121684	0.147711	0.282116	0.293129	0.319061	0.425958	0.289876	0.212555	0.28182	0.274426	0.258354	0.235633
rs80675679	HGF	395941	1	10506890	intron-variant	ss538123926	AX-75208034	C/T	0.75049	0.830398	0.376747	0.338856	0.746514	0.855953	0.887243	0.200483	0.59792	0.0144102	0.936339	0.0780022	0.284658	0.161482	0.0255314	0.579991	0.160666	0.0710976	0.577742	0.405527	0.708145	0.754059	0.0379353	0.0545891	0.332316	0.511413	0.981163	0.855111	0.833879	0.789223	0.81069	0.991471	0.965768	0.86959	0.914514	0.930581	0.936967	0.954255	0.943212	0.932397	0.869667
rs316369167	HGF	395941	1	10508168	intron-variant	ss537740767	AX-75208058	A/G	0.911842	0.60513	0.0734978	0.921792	0.429664	0.942353	0.865125	0.344715	0.681703	0.397995	0.383973	0.674966	0.165152	0.25504	0.178973	0.721123	0.574636	0.315164	0.718545	0.794334	0.807093	0.471049	0.103299	0.187358	0.223734	0.889131	0.213326	0.163473	0.159654	0.147857	0.17647	0.325032	0.33263	0.355075	0.462968	0.320454	0.238085	0.314014	0.306991	0.291696	0.270374
rs315193478	HGF	395941	1	10509371	intron-variant	ss537895813	AX-75208085	A/C	0.675992	0.730598	0.191464	0.554713	0.699155	0.847624	0.910457	0.117361	0.804808	0.0213569	0.862412	0.114832	0.270415	0.19544	0.067713	0.607453	0.26815	0.166966	0.605209	0.375579	0.57352	0.649243	0.0223221	0.0337524	0.352555	0.600642	0.748197	0.602589	0.592452	0.570344	0.603513	0.790412	0.751435	0.915457	0.880878	0.843428	0.69784	0.789822	0.783895	0.782006	0.826004
rs316268535	HGF	395941	1	10516104	intron-variant	ss538238162	AX-81000826	A/T	0.572038	0.821364	0.555956	0.367321	0.545694	0.642057	0.637736	0.209049	0.816842	0.00552279	0.0316957	0.0302326	0.793341	0.653982	0.286768	0.736685	0.288704	0.407163	0.73661	0.253941	0.541598	0.043769	0.161342	0.103819	0.774192	0.480553	0.0772809	0.099687	0.104492	0.104704	0.124854	0.169353	0.224025	0.138393	0.273882	0.153136	0.15614	0.170196	0.160119	0.13775	0.0899315
rs80764664	HGF	395941	1	10517851	intron-variant	ss538021966	AX-80936732	A/T	0.962894	0.829265	0.87531	0.247347	0.871021	0.872976	0.914591	0.022455	0.303852	0.0702586	0.526759	0.20495	0.737316	0.659768	0.115972	0.905716	0.538297	0.0859192	0.908669	0.176024	0.841815	0.55044	0.218323	0.0184618	0.709852	0.745971	0.588194	0.392997	0.38678	0.398994	0.337655	0.424197	0.404452	0.642811	0.476839	0.562755	0.441639	0.514751	0.490328	0.498124	0.525915
rs316000527	HGF	395941	1	10518017	intron-variant	ss538172892	AX-75208265	A/G	0.5003	0.241557	0.0141549	0.574582	0.783601	0.874482	0.482547	0.627837	0.405095	0.244514	0.269688	0.347567	0.24134	0.206179	0.353057	0.379267	0.350009	0.905773	0.379144	0.635886	0.658819	0.797766	0.0903368	0.762148	0.341801	0.546878	0.950284	0.851063	0.859417	0.92995	0.733476	0.585939	0.611706	0.747711	0.540806	0.748034	0.779761	0.756548	0.723289	0.740532	0.709805
rs80751138	HGF	395941	1	10519694	intron-variant	ss538025730	AX-75208302	C/T	0.869113	0.415022	0.0211244	0.280411	0.471714	0.7941	0.973345	0.197052	0.581551	0.328778	0.678243	0.372223	0.223621	0.38849	0.899521	0.576491	0.983633	0.491152	0.576427	0.258706	0.940177	0.133319	0.603647	0.349506	0.288101	0.866023	0.349538	0.442683	0.442841	0.404844	0.554936	0.734719	0.784202	0.538649	0.908816	0.576382	0.568308	0.617017	0.63251	0.593189	0.519042
rs13833785	HGF	395941	1	10521877	intron-variant	ss538124083	AX-80776909	A/T	0.911842	0.60513	0.0734978	0.921792	0.429664	0.942353	0.674852	0.344715	0.681703	0.397995	0.392284	0.674966	0.165152	0.25504	0.178973	0.721123	0.574636	0.315164	0.718545	0.794334	0.807093	0.471049	0.103299	0.187358	0.201188	0.889131	0.186954	0.141098	0.138716	0.129546	0.156653	0.300736	0.307938	0.333617	0.450381	0.309231	0.228209	0.297119	0.290816	0.27718	0.252422
rs313956452	HGF	395941	1	10523177	missense,reference	ss538139605	AX-75208376	A/G	0.791226	0.668346	0.709209	0.532362	0.436228	0.672582	0.831987	0.0812046	0.159656	0.0848218	0.411359	0.21176	0.865016	0.771255	0.315852	0.583716	0.967886	0.126008	0.581347	0.16876	0.449298	0.780769	0.382621	0.0494021	0.93031	0.521873	0.2168	0.13453	0.133482	0.129343	0.100347	0.132755	0.134648	0.25081	0.162589	0.215708	0.160607	0.190837	0.171435	0.168168	0.176094
rs312581639	HGF	395941	1	10526726	intron-variant	ss538214101	AX-75208459	C/T	0.456485	0.394	0.017349	0.55015	0.677797	0.921035	0.553633	0.627837	0.332687	0.148181	0.188488	0.347567	0.180987	0.131591	0.386189	0.313067	0.327973	0.956814	0.312962	0.683065	0.51184	0.950105	0.0442234	0.762148	0.315422	0.683172	0.674852	0.587574	0.597271	0.666466	0.4988	0.385058	0.413023	0.540825	0.37552	0.541463	0.567345	0.540552	0.508584	0.517951	0.487272
rs312502080	HGF	395941	1	10531048	utr-variant-3-prime	ss537815951	AX-80830426	C/G	0.456485	0.394	0.017349	0.55015	0.677797	0.921035	0.559184	0.627837	0.332687	0.148181	0.177732	0.347567	0.180987	0.131591	0.386189	0.313067	0.327973	0.956814	0.312962	0.683065	0.51184	0.950105	0.0442234	0.762148	0.312904	0.683172	0.666194	0.580313	0.590564	0.659551	0.492983	0.380419	0.409114	0.536655	0.372246	0.537262	0.562193	0.534859	0.50216	0.510779	0.479739
rs80721472	CD36	417730	1	11008296	intron-variant	ss537807700	AX-75218902	C/T	0.605255	0.859113	0.145771	0.88148	0.311953	0.4708	0.760829	0.993578	0.521193	0.988654	0.550772	0.692865	0.336993	0.486354	0.172735	0.128414	0.0287809	0.508248	0.126982	0.746566	0.46396	0.578038	0.0875204	0.388526	0.183032	0.58223	0.663614	0.632743	0.60686	0.470301	0.54853	0.709635	0.753663	0.701192	0.733821	0.526144	0.418257	0.595263	0.572164	0.528726	0.456885
rs313639547	CD36	417730	1	11011874	intron-variant	ss537930968	AX-75218986	A/C	0.994561	0.864708	0.724526	0.020515	0.418476	0.399679	0.931365	0.0130478	0.246867	0.271795	0.448717	0.498986	0.353711	0.320021	0.855404	0.815854	0.698595	0.877293	0.815835	0.319673	0.380725	0.114108	0.491752	0.0392587	0.244827	0.738958	0.972573	0.772101	0.750278	0.841893	0.795116	0.877649	0.784425	0.943532	0.930311	0.998316	0.788016	0.892725	0.870941	0.876803	0.908584
rs80627455	CD36	417730	1	11015263	intron-variant	ss537865411	AX-75219067	A/G	0.553825	0.114219	0.0450849	0.485179	0.776347	0.950511	0.0944242	0.396664	0.740021	0.01213	0.0764386	0.0493058	0.0918899	0.0566406	0.0779648	0.859525	0.100868	0.0498676	0.859475	0.362314	0.133111	0.701224	0.743266	0.242934	0.224499	0.235419	0.498752	0.583938	0.607735	0.57658	0.766983	0.962522	0.986979	0.781211	0.787083	0.680779	0.632089	0.636283	0.568222	0.486983	0.385289
rs314359799	CD36	417730	1	11015442	intron-variant	ss538280233	AX-75219072	C/T	0.73397	0.69368	0.0884021	0.0925929	0.683023	0.525567	0.822598	0.209957	0.433726	0.971921	0.181469	0.765166	0.0797569	0.057434	0.981703	0.8532	0.586596	0.668139	0.853156	0.752699	0.829351	0.46025	0.233146	0.274544	0.0497315	0.588852	0.437324	0.336523	0.317711	0.308459	0.363503	0.553629	0.492395	0.49904	0.658269	0.492927	0.340164	0.457575	0.455458	0.433822	0.405826
rs317404705	CD36	417730	1	11015850	intron-variant	ss537905339	AX-80742948	A/T	0.285025	0.865791	0.311595	0.329985	0.597457	0.535306	0.981641	0.337526	0.135236	0.861497	0.562306	0.700036	0.82004	0.1105	0.359679	0.261795	0.246962	0.896062	0.255758	0.816028	0.0335955	0.0123222	0.130437	0.667459	0.499188	0.219677	0.0716413	0.101292	0.110281	0.0859991	0.0825843	0.0835555	0.112504	0.110887	0.100603	0.11221	0.127827	0.111459	0.0941464	0.0832699	0.0832914
rs313708936	CD36	417730	1	11017999	intron-variant	ss538044684	AX-75219129	C/T	0.407747	0.669161	0.899234	0.234088	0.783406	0.503742	0.928664	0.172152	0.70865	0.191293	0.898407	0.44185	0.987591	0.864551	0.456861	0.138995	0.108685	0.881768	0.138977	0.568286	0.00914379	0.00969774	0.0638364	0.0600741	0.318039	0.584147	0.429667	0.589787	0.626497	0.619628	0.636216	0.626657	0.657451	0.49281	0.68717	0.71358	0.85747	0.663135	0.672162	0.663085	0.654226
rs313100072	CD36	417730	1	11020883	intron-variant	ss538205611	AX-75219187	C/T	0.646419	0.715603	0.144935	0.858189	0.363227	0.452324	0.827048	0.993578	0.460803	0.846018	0.876264	0.692865	0.41039	0.612755	0.184926	0.108579	0.0270283	0.584136	0.107332	0.72104	0.559646	0.666319	0.146188	0.388526	0.165735	0.504481	0.670875	0.647771	0.623452	0.478475	0.556945	0.720239	0.76518	0.705411	0.724995	0.512678	0.412829	0.589001	0.564204	0.522747	0.463557
rs316085929	CD36	417730	1	11029559	intron-variant	ss537763837	AX-75219386	A/G	0.429204	0.100627	0.066692	0.271747	0.649064	0.75523	0.128571	0.694214	0.832109	0.0984087	0.029614	0.15583	0.0490728	0.00819449	0.296484	0.716753	0.388814	0.0827352	0.712046	0.417712	0.918929	0.487928	0.329321	0.424876	0.144412	0.155696	0.900308	0.934724	0.939666	0.985798	0.80443	0.58627	0.637633	0.812212	0.416231	0.875599	0.938018	0.905731	0.954924	0.973419	0.849704
rs15202064	CD36	417730	1	11037700	intron-variant	ss538182273	AX-75219576	A/G	0.304227	0.107011	0.755215	0.0218816	0.152991	0.967986	0.0475322	0.326635	0.972527	0.251519	0.0907282	0.284814	0.4125	0.0525388	0.139793	0.970372	0.226933	0.0578461	0.977114	0.724909	0.490173	0.0194395	0.525921	0.833989	0.313463	0.118743	0.204607	0.251574	0.238745	0.175477	0.141418	0.0992609	0.138346	0.120433	0.0753884	0.194672	0.238394	0.252894	0.301835	0.332265	0.380177
rs317223692	GNAT3	427851	1	11081550	upstream-variant-2KB	ss537724199	AX-75220560	A/G	0.643349	0.929027	0.881452	0.397456	0.816554	0.323186	0.902305	0.409178	0.298825	0.187091	0.991242	0.328058	0.906366	0.920617	0.216765	0.0743786	0.0379354	0.788094	0.0734313	0.510735	0.149407	0.0988169	0.138509	0.20398	0.513924	0.551019	0.615439	0.659722	0.702256	0.787253	0.830114	0.933165	0.911305	0.726195	0.990617	0.989784	0.865634	0.930064	0.949718	0.958891	0.964925
rs317767013	GNAT3	427851	1	11081737	upstream-variant-2KB	ss537891059	AX-75220563	C/T	0.691013	0.893083	0.131389	0.0346104	0.910947	0.356721	0.745782	0.154634	0.448042	0.343553	0.707782	0.474122	0.0565247	0.0107499	0.598782	0.660326	0.895494	0.949413	0.660299	0.846605	0.953719	0.176504	0.120965	0.303615	0.116579	0.475223	0.618616	0.644654	0.608986	0.560927	0.655677	0.690044	0.613688	0.778126	0.747469	0.691113	0.533749	0.658817	0.670545	0.65074	0.583218
rs317359127	GNAT3	427851	1	11084568	intron-variant	ss537971129	AX-80780355	C/G	0.838855	0.960407	0.208844	0.104098	0.543517	0.272896	0.745905	0.30597	0.282367	0.368438	0.595273	0.472065	0.0898498	0.0580908	0.913592	0.944453	0.754899	0.982085	0.948896	0.806469	0.481143	0.544817	0.216508	0.442502	0.195315	0.688073	0.257802	0.288772	0.26822	0.225463	0.273854	0.287984	0.255704	0.350262	0.325848	0.301974	0.218997	0.288164	0.288844	0.269146	0.225781
rs314819001	GNAT3	427851	1	11088121	intron-variant	ss537901915	AX-75220699	G/T	0.833014	0.847445	0.902678	0.0116984	0.53291	0.372473	0.8982	0.0191498	0.225281	0.203722	0.309422	0.29942	0.454201	0.282323	0.815385	0.884654	0.733419	0.877084	0.884633	0.360707	0.463632	0.0624807	0.33199	0.126296	0.227696	0.478876	0.969566	0.824376	0.789093	0.875856	0.824955	0.775411	0.69682	0.97735	0.82154	0.89298	0.673973	0.787697	0.786902	0.796584	0.83727
rs80635550	GNAT3	427851	1	11092519	intron-variant	ss538082091	AX-75220803	C/T	0.53986	0.58773	0.0358438	0.919388	0.68052	0.906046	0.614044	0.508974	0.540516	0.169158	0.712654	0.29314	0.0471673	0.0131029	0.264937	0.327796	0.278454	0.798341	0.327707	0.50538	0.929394	0.807815	0.0320623	0.984619	0.333991	0.767516	0.90172	0.813462	0.838607	0.929577	0.74701	0.637401	0.693727	0.846834	0.624457	0.783023	0.804397	0.768103	0.739232	0.752418	0.723498
rs14796561	GNAT3	427851	1	11093656	intron-variant	ss537714726	AX-75220832	A/G	0.894313	0.712608	0.871253	0.0661146	0.670797	0.204878	0.902744	0.131148	0.121542	0.839681	0.391187	0.845828	0.498561	0.584542	0.598988	0.624054	0.32939	0.863054	0.619666	0.513676	0.47233	0.6026	0.927962	0.40887	0.444723	0.546531	0.212192	0.218537	0.210383	0.195588	0.190274	0.171301	0.160058	0.292606	0.199471	0.235166	0.164717	0.212207	0.20157	0.18831	0.14455
rs312495519	GNAT3	427851	1	11098333	reference,synonymous-codon	ss537858304	AX-75220947	A/C	0.932013	0.532016	0.772017	0.0563744	0.401654	0.192061	0.647741	0.111434	0.145192	0.94555	0.379504	0.879423	0.534401	0.608876	0.429385	0.637171	0.276053	0.659256	0.632826	0.465181	0.402602	0.605573	0.944588	0.317237	0.333442	0.473204	0.283806	0.293251	0.282204	0.24528	0.239984	0.213124	0.208748	0.370353	0.23893	0.287813	0.211789	0.269421	0.256633	0.239259	0.181857
rs315806359	GNAT3	427851	1	11103181	intron-variant	ss538223170	AX-75221056	C/T	0.912856	0.645201	0.618891	0.0144168	0.761657	0.261971	0.610295	0.0395534	0.253881	0.93719	0.590004	0.835761	0.433499	0.24888	0.698903	0.920685	0.514691	0.7082	0.92065	0.497236	0.979321	0.184432	0.756764	0.202483	0.16346	0.282255	0.659291	0.635102	0.604226	0.561638	0.555083	0.512106	0.468004	0.715864	0.512239	0.573149	0.444541	0.559428	0.565869	0.560376	0.477855
rs312744032	GNAT3	427851	1	11103820	intron-variant	ss537772774	AX-75221074	A/G	0.654166	0.898821	0.0993482	0.0252902	0.605201	0.323881	0.75918	0.12263	0.472229	0.491383	0.65244	0.700728	0.0581679	0.0101045	0.792708	0.647895	0.997024	0.83543	0.647852	0.791746	0.940829	0.166287	0.1246	0.224167	0.0763712	0.390243	0.707286	0.729282	0.683916	0.595625	0.685802	0.707314	0.640742	0.816072	0.754677	0.724005	0.584746	0.725569	0.747603	0.734613	0.659364
rs316906012	GNAT3	427851	1	11107144	intron-variant	ss537991736	AX-75221143	C/T	0.932501	0.52884	0.779336	0.0564893	0.407562	0.192724	0.6123	0.111798	0.141882	0.937763	0.414882	0.875873	0.534161	0.619341	0.428523	0.637846	0.275347	0.65588	0.633501	0.475283	0.399311	0.597218	0.963636	0.32475	0.297766	0.463629	0.289845	0.294905	0.280124	0.240102	0.232581	0.204589	0.199549	0.355714	0.229951	0.27994	0.208427	0.269346	0.26096	0.246674	0.190489
rs15202011	GNAT3	427851	1	11111347	intron-variant	ss537952952	AX-75221237	A/C	0.484071	0.829339	0.011194	0.817199	0.375349	0.998071	0.529024	0.463343	0.527866	0.493259	0.394435	0.723575	0.0741182	0.0121492	0.392481	0.340205	0.36568	0.930914	0.340117	0.434515	0.358929	0.987239	0.0417959	0.988669	0.370594	0.875905	0.501737	0.400016	0.405729	0.548909	0.409137	0.304994	0.344905	0.514052	0.370059	0.491813	0.51286	0.493142	0.479483	0.501512	0.493459
rs317714083	GNAI1	396368	1	11191719	intron-variant	ss537937940	AX-80986316	A/T	0.45145	0.402884	0.652147	0.840236	0.351933	0.259639	0.886686	0.623049	0.952922	0.833045	0.660304	0.746091	0.723237	0.258628	0.154878	0.336303	0.187045	0.441471	0.337863	0.926323	0.00502456	0.317353	0.0821658	0.243449	0.385048	0.556317	0.132923	0.097727	0.104275	0.149903	0.110439	0.152812	0.0993351	0.105421	0.171798	0.187151	0.158911	0.137063	0.146006	0.146248	0.159413
rs313912649	GNAI1	396368	1	11196888	reference,synonymous-codon	ss538151194	AX-75222669	C/T	0.0912629	0.327428	0.70466	0.21868	0.0992036	0.130591	0.893275	0.0435066	0.619433	0.983842	0.568913	0.648535	0.158483	0.0287109	0.779294	0.481706	0.789943	0.601168	0.47907	0.855651	0.192562	0.776585	0.325568	0.173062	0.144831	0.468638	0.757081	0.702268	0.726314	0.745498	0.618392	0.739729	0.630136	0.585554	0.659483	0.607901	0.591824	0.628481	0.646299	0.646447	0.646104
rs15201919	GNAI1	396368	1	11199855	intron-variant	ss537950205	AX-75222732	A/C	0.248776	0.441512	0.413252	0.68464	0.167936	0.333056	0.563872	0.289082	0.824031	0.504887	0.896712	0.661617	0.948314	0.952529	0.407331	0.3369	0.211233	0.908601	0.340233	0.102848	0.0194349	0.276433	0.528699	0.858234	0.908263	0.679962	0.966389	0.859843	0.837669	0.878812	0.993373	0.919765	0.914726	0.862712	0.999212	0.951582	0.849113	0.924909	0.966495	0.963619	0.899058
rs15201910	GNAI1	396368	1	11202006	intron-variant	ss537958010	AX-75222774	C/T	0.730048	0.181027	0.746344	0.197083	0.521716	0.76076	0.647528	0.935981	0.905007	0.665334	0.133224	0.88049	0.439842	0.212949	0.874508	0.797137	0.838049	0.67022	0.797164	0.725838	0.0787111	0.579796	0.551187	0.325336	0.9538	0.323426	0.412096	0.333666	0.353461	0.531356	0.566917	0.717645	0.560966	0.622914	0.886271	0.703675	0.558911	0.447121	0.395781	0.364667	0.354116
rs15201908	GNAI1	396368	1	11202168	intron-variant	ss538263606	AX-75222776	C/T	0.730048	0.181027	0.746344	0.197083	0.521716	0.76076	0.714704	0.935981	0.905007	0.665334	0.149716	0.88049	0.439842	0.212949	0.874508	0.797137	0.838049	0.67022	0.797164	0.725838	0.0787111	0.579796	0.551187	0.325336	0.975591	0.323426	0.399597	0.322516	0.341191	0.512825	0.550331	0.69632	0.545372	0.607746	0.871289	0.693497	0.550505	0.444687	0.395724	0.364868	0.360054
rs80764970	GNAI1	396368	1	11203983	intron-variant	ss538104745	AX-75222817	C/T	0.581451	0.633573	0.688889	0.769559	0.54833	0.488594	0.263733	0.906585	0.749753	0.843033	0.895365	0.434285	0.393151	0.325551	0.10226	0.371592	0.155622	0.235244	0.371539	0.983183	0.0382803	0.0516335	0.20475	0.282164	0.549121	0.682179	0.207997	0.164675	0.16787	0.266598	0.255979	0.315106	0.231533	0.253624	0.372707	0.428708	0.337031	0.256964	0.266487	0.277967	0.317129
rs13833376	GNAI1	396368	1	11205425	intron-variant	ss538094676	AX-75222843	C/T	0.182943	0.0616076	0.347064	0.317315	0.89056	0.321404	0.975014	0.443913	0.420927	0.23859	0.362247	0.679228	0.526273	0.200711	0.526506	0.348581	0.358029	0.865416	0.348555	0.192786	0.0142748	0.640347	0.309301	0.26352	0.740667	0.344742	0.5194	0.614679	0.656434	0.888588	0.86106	0.927207	0.913722	0.787973	0.865893	0.806672	0.867355	0.712688	0.634611	0.618318	0.585404
rs314084929	GNAI1	396368	1	11206069	intron-variant	ss537714159	AX-80794848	C/G	0.0912629	0.327428	0.70466	0.21868	0.0992036	0.130591	0.920057	0.0435066	0.619433	0.983842	0.650876	0.648535	0.158483	0.0287109	0.779294	0.481706	0.789943	0.601168	0.47907	0.855651	0.192562	0.776585	0.325568	0.173062	0.153087	0.468638	0.684762	0.632431	0.657722	0.67889	0.560985	0.68043	0.581647	0.54684	0.627251	0.575457	0.558807	0.593123	0.608756	0.605051	0.598729
rs316316789	GNAI1	396368	1	11208314	intron-variant	ss538205146	AX-75222906	A/C	0.83892	0.757725	0.87025	0.858975	0.584148	0.600688	0.240406	0.852654	0.98678	0.851745	0.466297	0.96456	0.825895	0.564397	0.759588	0.796912	0.522012	0.854505	0.799583	0.173997	0.942212	0.234781	0.572541	0.910817	0.945056	0.626494	0.987511	0.868953	0.884495	0.741049	0.872131	0.977461	0.887558	0.969669	0.949208	0.881053	0.669277	0.787381	0.830867	0.774891	0.682788
rs13714930	GNAI1	396368	1	11210866	intron-variant	ss538208154	AX-75222946	A/G	0.574312	0.166863	0.125443	0.319629	0.85047	0.835609	0.905142	0.78178	0.736806	0.845283	0.617225	0.765053	0.156391	0.0332029	0.733489	0.54318	0.791606	0.846321	0.543142	0.903692	0.0408605	0.566494	0.762043	0.410406	0.657337	0.528193	0.628185	0.599896	0.624918	0.786754	0.919152	0.834985	0.980798	0.926937	0.7338	0.960021	0.793328	0.682359	0.630711	0.583706	0.586596
rs312859410	GNAI1	396368	1	11210956	intron-variant	ss537807394	AX-75222949	A/G	0.228442	0.0833786	0.11372	0.604818	0.514321	0.391323	0.880116	0.127721	0.98036	0.562789	0.780125	0.837313	0.430995	0.402067	0.672772	0.839052	0.996409	0.990207	0.841054	0.679313	0.00136767	0.27432	0.468966	0.0774121	0.830888	0.777812	0.314748	0.273902	0.297702	0.396309	0.43398	0.706561	0.498343	0.456617	0.80515	0.530214	0.389015	0.333678	0.305676	0.269119	0.266171
rs315212642	GNAI1	396368	1	11216471	intron-variant	ss538177500	AX-75223069	A/G	0.296079	0.539226	0.837952	0.499955	0.189433	0.255405	0.6797	0.0459284	0.605935	0.525734	0.827435	0.887821	0.365262	0.0849488	0.855615	0.577797	0.730082	0.757301	0.575008	0.700538	0.0525555	0.360531	0.118535	0.150456	0.302775	0.59037	0.448921	0.401967	0.41864	0.456584	0.381599	0.474386	0.397657	0.387753	0.466764	0.413928	0.379374	0.411731	0.418361	0.4006	0.394765
rs317449866	GNAI1	396368	1	11220379	intron-variant	ss538287205	AX-75223138	A/G	0.379864	0.290165	0.00948074	0.981013	0.544468	0.971208	0.604935	0.554802	0.489005	0.416055	0.238654	0.407012	0.142898	0.0638367	0.242753	0.423682	0.326486	0.674351	0.423551	0.387092	0.621563	0.722598	0.0475057	0.947816	0.373371	0.72681	0.910916	0.818744	0.841878	0.930888	0.748301	0.617411	0.672567	0.842336	0.629886	0.824792	0.844684	0.810376	0.766724	0.764509	0.713564
rs312350504	GNAI1	396368	1	11221675	intron-variant	ss537915261	AX-75223165	C/T	0.191279	0.122534	0.994511	0.0919378	0.810301	0.674788	0.0424977	0.777657	0.807272	0.348431	0.0363054	0.449138	0.895264	0.500751	0.0161205	0.448116	0.0278532	0.0243884	0.448005	0.549382	0.915305	0.0973544	0.504175	0.863564	0.543587	0.327883	0.803937	0.859031	0.822989	0.715268	0.63374	0.519459	0.593633	0.545949	0.400588	0.721373	0.80497	0.852267	0.978243	0.92801	0.825181
rs317543581	GNAI1	396368	1	11221817	intron-variant	ss537926295	AX-75223171	A/G	0.569084	0.224679	0.264539	0.109779	0.701529	0.189575	0.0662222	0.0255626	0.0946637	0.168768	0.208552	0.0639977	0.828168	0.824887	0.607828	0.134332	0.562264	0.19824	0.134332	0.530059	0.308564	0.402275	0.563533	0.144996	0.102249	0.107606	0.904266	0.971601	0.997858	0.814127	0.780529	0.713133	0.799734	0.820125	0.712786	0.811726	0.905556	0.896781	0.847814	0.782018	0.721376
rs318159173	GNAI1	396368	1	11223174	intron-variant	ss537787567	AX-75223204	A/G	0.0665392	0.150492	0.654954	0.191351	0.118708	0.192371	0.902998	0.035721	0.280922	0.838563	0.916129	0.731034	0.118531	0.0158588	0.900991	0.651915	0.690379	0.983964	0.649154	0.682163	0.361466	0.800462	0.317132	0.0852646	0.213709	0.620998	0.206412	0.233367	0.242371	0.244361	0.21406	0.26684	0.220514	0.210416	0.258727	0.204467	0.229393	0.256416	0.275268	0.284025	0.220956
rs13833170	MAGI2	417729	1	11504496	upstream-variant-2KB	ss537925291	AX-75229228	A/G	0.950391	0.940387	0.246285	0.0818577	0.228812	0.777696	0.160777	0.388654	0.813909	0.826711	0.790668	0.742705	0.141929	0.00491906	0.269464	0.39406	0.276103	0.772354	0.386308	0.783851	0.0657448	0.229613	0.572722	0.536747	0.339468	0.51583	0.101962	0.13101	0.137867	0.106216	0.0904428	0.083093	0.0962682	0.0755913	0.0614905	0.0761671	0.0865663	0.0795351	0.0708728	0.0680224	0.0712023
rs314272667	MAGI2	417729	1	11508377	intron-variant	ss538136064	AX-75229312	A/C	0.61635	0.696235	0.688769	0.864731	0.223214	0.801565	0.53725	0.00385794	0.248482	0.72553	0.82942	0.297869	0.827025	0.484839	0.970095	0.572288	0.931992	0.365402	0.57445	0.478694	0.112699	0.898494	0.588081	0.00205614	0.997855	0.837884	0.193491	0.191162	0.182132	0.118316	0.188411	0.173488	0.197119	0.104676	0.172857	0.123268	0.0868426	0.126294	0.150371	0.151526	0.132824
rs13833167	MAGI2	417729	1	11509463	intron-variant	ss537928470	AX-80909038	A/T	0.950391	0.940387	0.246285	0.0818577	0.228812	0.777696	0.160777	0.388654	0.813909	0.826711	0.790668	0.742705	0.141929	0.00491906	0.269464	0.39406	0.276103	0.772354	0.386308	0.783851	0.0657448	0.229613	0.572722	0.536747	0.339468	0.51583	0.101962	0.13101	0.137867	0.106216	0.0904428	0.083093	0.0962682	0.0755913	0.0614905	0.0761671	0.0865663	0.0795351	0.0708728	0.0680224	0.0712023
rs14796218	MAGI2	417729	1	11511953	intron-variant	ss538222237	AX-75229392	C/T	0.45437	0.0969173	0.92132	0.145397	0.302806	0.389938	0.733538	0.763629	0.597037	0.887048	0.279295	0.546016	0.203828	0.0576402	0.802319	0.334464	0.678872	0.582119	0.331476	0.409306	0.536214	0.686602	0.719721	0.259499	0.549155	0.229424	0.836891	0.940237	0.884296	0.586968	0.512769	0.375626	0.475409	0.489238	0.304983	0.469583	0.675844	0.8223	0.925978	0.99934	0.951893
rs312436974	MAGI2	417729	1	11515876	intron-variant	ss537742382	AX-75229472	A/G	0.534852	0.615906	0.842229	0.585935	0.731145	0.952945	0.398819	0.392356	0.241635	0.618534	0.493965	0.846287	0.761118	0.828204	0.548221	0.0725625	0.172188	0.336449	0.0725429	0.122767	0.293011	0.601661	0.548929	0.221347	0.372476	0.362872	0.61565	0.701871	0.672892	0.548483	0.571379	0.488208	0.55862	0.309237	0.405606	0.377907	0.469701	0.48223	0.500513	0.544274	0.547719
rs316473163	MAGI2	417729	1	11517267	intron-variant	ss537953317	AX-75229498	A/G	0.351498	0.814456	0.184966	0.510736	0.129666	0.833262	0.685164	0.030432	0.135925	0.674049	0.837264	0.608573	0.964247	0.472344	0.880156	0.928749	0.689164	0.446988	0.931096	0.209206	0.391977	0.915214	0.628949	0.0670009	0.866355	0.986833	0.399178	0.398508	0.390694	0.286709	0.415887	0.390252	0.434986	0.267422	0.391864	0.302623	0.223914	0.303713	0.349744	0.346983	0.308938
rs313531247	MAGI2	417729	1	11519105	intron-variant	ss538054285	AX-75229526	C/T	0.561842	0.12833	0.922971	0.279415	0.608943	0.516343	0.698696	0.955708	0.864026	0.885173	0.199401	0.505152	0.241937	0.17802	0.859456	0.541168	0.958268	0.50813	0.541208	0.356374	0.137	0.73788	0.915609	0.162915	0.723233	0.369651	0.656647	0.5908	0.646104	0.929777	0.990266	0.814741	0.923894	0.950822	0.692024	0.909279	0.859433	0.69358	0.58344	0.507289	0.458944
rs316646537	MAGI2	417729	1	11521220	intron-variant	ss537771946	AX-75229565	C/T	0.826158	0.990062	0.453959	0.646285	0.413298	0.593906	0.383618	0.0318979	0.34912	0.819136	0.277137	0.438086	0.463313	0.0656712	0.344788	0.779524	0.271708	0.207933	0.776724	0.566736	0.485176	0.959855	0.308612	0.00823637	0.920609	0.652026	0.10861	0.0855787	0.0807866	0.0617152	0.0816261	0.0542256	0.0725704	0.0466068	0.0644636	0.0589311	0.0397236	0.0606248	0.0729743	0.0757295	0.0615163
rs15201390	MAGI2	417729	1	11523794	intron-variant	ss537827617	AX-75229620	A/C	0.141958	0.165003	0.692299	0.479382	0.877846	0.471531	0.46028	0.721194	0.112097	0.97112	0.204878	0.822223	0.406178	0.374547	0.746552	0.0578086	0.315156	0.162508	0.0577988	0.207493	0.221152	0.531673	0.836056	0.16639	0.426281	0.190386	0.773106	0.799839	0.832306	0.946805	0.960295	0.914558	0.910767	0.759603	0.889922	0.897356	0.835216	0.726718	0.662327	0.638031	0.60414
rs314381397	MAGI2	417729	1	11523992	intron-variant	ss537798597	AX-75229623	A/G	0.161648	0.049958	0.028476	0.70678	0.929971	0.949306	0.487391	0.244276	0.147706	0.591978	0.0874481	0.482387	0.0722768	0.0185433	0.94541	0.878589	0.722857	0.759593	0.878599	0.815547	0.947948	0.399586	0.030877	0.314802	0.375914	0.542305	0.0945082	0.0691294	0.063885	0.0665918	0.0292868	0.0149962	0.0190528	0.0481909	0.0261793	0.0672023	0.139481	0.141471	0.155275	0.181011	0.189657
rs315774959	MAGI2	417729	1	11525860	intron-variant	ss537772180	AX-80881543	A/T	0.193889	0.0881777	0.404601	0.522728	0.857367	0.611665	0.471993	0.198583	0.198724	0.705417	0.361259	0.310197	0.368651	0.392807	0.991925	0.358106	0.980392	0.252363	0.356863	0.829301	0.182787	0.62418	0.61414	0.0113092	0.559514	0.21875	0.463763	0.395415	0.415361	0.492313	0.700262	0.809121	0.744889	0.530285	0.889377	0.58506	0.345027	0.344814	0.332275	0.29792	0.254984
rs316689553	MAGI2	417729	1	11526512	intron-variant	ss537868543	AX-75229682	C/T	0.193889	0.0881777	0.404601	0.522728	0.857367	0.611665	0.440485	0.198583	0.198724	0.705417	0.347069	0.310197	0.368651	0.392807	0.991925	0.358106	0.980392	0.252363	0.356863	0.829301	0.182787	0.62418	0.61414	0.0113092	0.538358	0.21875	0.436971	0.372028	0.392154	0.466201	0.670172	0.780462	0.718259	0.508447	0.863761	0.562803	0.327885	0.326024	0.31285	0.278398	0.23603
rs318202619	MAGI2	417729	1	11529835	intron-variant	ss537881315	AX-75229762	C/T	0.291595	0.102177	0.6115	0.773764	0.515665	0.737969	0.434769	0.382945	0.183347	0.549337	0.512561	0.717311	0.241822	0.158703	0.468969	0.568849	0.369755	0.486866	0.568766	0.692748	0.185734	0.389084	0.156687	0.454682	0.694781	0.436462	0.0544261	0.0498118	0.0418824	0.0262481	0.0137273	0.00953476	0.00962011	0.0167501	0.0128023	0.0259582	0.0737923	0.08156	0.100654	0.125313	0.147268
rs314862812	MAGI2	417729	1	11529917	intron-variant	ss537731626	AX-75229764	A/G	0.826158	0.990062	0.453959	0.646285	0.413298	0.593906	0.452054	0.0318979	0.34912	0.819136	0.188236	0.438086	0.347081	0.030476	0.344788	0.779524	0.271708	0.207933	0.776724	0.899618	0.485176	0.959855	0.308612	0.00823637	0.916103	0.652026	0.212326	0.173289	0.163616	0.122092	0.152777	0.106719	0.144353	0.097024	0.133001	0.12599	0.0932279	0.139886	0.167939	0.180344	0.150804
rs314465025	MAGI2	417729	1	11530530	intron-variant	ss537927123	AX-75229777	C/T	0.826158	0.990062	0.453959	0.646285	0.413298	0.593906	0.404407	0.0318979	0.34912	0.819136	0.279214	0.438086	0.463313	0.0656712	0.344788	0.779524	0.271708	0.207933	0.776724	0.566736	0.485176	0.959855	0.308612	0.00823637	0.932883	0.652026	0.112847	0.0895793	0.0850218	0.065458	0.0864404	0.0575597	0.0764857	0.0490742	0.0676926	0.0621335	0.041986	0.063934	0.07665	0.0794155	0.0647689
rs15201377	MAGI2	417729	1	11534506	intron-variant	ss538128257	AX-75229865	C/T	0.0333264	0.099895	0.546884	0.950026	0.700038	0.402325	0.452855	0.253691	0.0332409	0.707904	0.412574	0.630902	0.783602	0.670857	0.63598	0.392986	0.963615	0.0876694	0.392977	0.107805	0.699989	0.12373	0.223394	0.170975	0.546304	0.632024	0.589098	0.527034	0.510655	0.470361	0.381704	0.374836	0.324999	0.604363	0.389418	0.635796	0.64795	0.671345	0.729337	0.742931	0.795892
rs317796916	MAGI2	417729	1	11538852	intron-variant	ss538220452	AX-75229962	A/G	0.388051	0.217326	0.74378	0.302538	0.216777	0.769601	0.701983	0.440637	0.196452	0.843126	0.943225	0.778673	0.312687	0.0775198	0.88732	0.278595	0.369278	0.458974	0.27734	0.427344	0.213641	0.128132	0.591202	0.823692	0.15534	0.778054	0.0429562	0.0277987	0.0264829	0.0189435	0.0240538	0.0270644	0.0235005	0.0490203	0.0472058	0.0506971	0.0366798	0.0568465	0.073429	0.0708145	0.061304
rs314146782	MAGI2	417729	1	11539389	intron-variant	ss538159334	AX-75229974	A/G	0.331199	0.629578	0.362688	0.339149	0.303756	0.624333	0.157078	0.040999	0.569683	0.589408	0.0374375	0.254125	0.169804	0.0222238	0.145751	0.651844	0.103416	0.0908208	0.649467	0.779421	0.535601	0.830458	0.656105	0.0120005	0.632497	0.497832	0.0747331	0.0540223	0.0548153	0.0597772	0.077885	0.0669692	0.0851163	0.0653624	0.111569	0.0614809	0.0488574	0.0625077	0.0617106	0.0580357	0.0408124
rs14796181	MAGI2	417729	1	11543789	intron-variant	ss538090212	AX-75230063	A/G	0.977154	0.435974	0.502891	0.148191	0.367777	0.983394	0.722221	0.227155	0.688283	0.515523	0.594234	0.606139	0.153179	0.0991619	0.535405	0.0594595	0.110298	0.608319	0.0598282	0.664855	0.17353	0.859854	0.452142	0.938389	0.238306	0.373988	0.838623	0.741155	0.706619	0.5701	0.659077	0.658202	0.665589	0.824281	0.714997	0.625408	0.580246	0.808136	0.917005	0.934151	0.887581
rs316230419	MAGI2	417729	1	11546079	intron-variant	ss537877564	AX-75230113	A/G	0.803856	0.573736	0.453138	0.92737	0.961493	0.738922	0.975983	0.10941	0.641174	0.492505	0.567593	0.153625	0.9321	0.944028	0.581273	0.111249	0.0826213	0.707218	0.112136	0.0865148	0.828433	0.832601	0.644616	0.0808462	0.769548	0.784128	0.39583	0.267771	0.265408	0.257076	0.416713	0.509109	0.419099	0.542881	0.599627	0.448465	0.192068	0.282078	0.325969	0.291102	0.24741
rs15201353	MAGI2	417729	1	11546413	intron-variant	ss537901853	AX-75230119	G/T	0.686134	0.947717	0.821286	0.827761	0.288474	0.612406	0.537695	0.40842	0.953339	0.913431	0.0153909	0.788281	0.7295	0.196475	0.844852	0.439606	0.897599	0.289015	0.441263	0.743201	0.033949	0.406517	0.256584	0.0589133	0.675144	0.146421	0.0253101	0.0146716	0.0159904	0.0249141	0.0325162	0.0321232	0.0346069	0.0313199	0.0757978	0.0533713	0.0348299	0.0338133	0.0330363	0.0284635	0.0195688
rs15201346	MAGI2	417729	1	11548169	intron-variant	ss538065703	AX-75230157	C/T	0.494809	0.64618	0.297885	0.223651	0.620711	0.892938	0.882314	0.043967	0.641305	0.231312	0.283791	0.233149	0.490311	0.477065	0.213258	0.00818021	0.0111581	0.880291	0.00825151	0.433306	0.0239514	0.388839	0.0763442	0.458317	0.418075	0.15512	0.370284	0.436856	0.446505	0.559505	0.377822	0.343612	0.340723	0.292662	0.338851	0.527155	0.717248	0.493573	0.441643	0.47467	0.549319
rs315096871	MAGI2	417729	1	11549048	intron-variant	ss538053875	AX-75230172	C/T	0.276919	0.614824	0.921067	0.912495	0.512725	0.568226	0.318324	0.136308	0.556541	0.79171	0.025248	0.437689	0.372259	0.188121	0.378388	0.956005	0.288162	0.139946	0.958376	0.661048	0.891238	0.363487	0.988691	0.0361424	0.941246	0.308384	0.20358	0.142596	0.139509	0.162013	0.207104	0.184831	0.199904	0.198345	0.285687	0.174151	0.138746	0.175918	0.18265	0.178771	0.13639
rs13833144	MAGI2	417729	1	11551438	intron-variant	ss537784401	AX-75230219	G/T	0.550588	0.383227	0.853958	0.312989	0.727887	0.912358	0.625014	0.165472	0.461088	0.870156	0.0374273	0.358495	0.647914	0.940797	0.416226	0.91892	0.312627	0.177902	0.921058	0.995326	0.105016	0.957911	0.575198	0.00255213	0.806344	0.215978	0.0644258	0.0390016	0.0404822	0.0599892	0.0878557	0.0894972	0.0751398	0.0603091	0.143135	0.0843895	0.0401897	0.039214	0.036444	0.0296799	0.0208323
rs314027356	MAGI2	417729	1	11552009	intron-variant	ss538075775	AX-75230231	A/G	0.425342	0.364125	0.964617	0.22622	0.920542	0.833861	0.676486	0.301062	0.263667	0.85256	0.0530735	0.530639	0.611656	0.693064	0.679735	0.58731	0.611607	0.179895	0.585569	0.946386	0.482813	0.518117	0.828676	0.011054	0.758501	0.162636	0.244751	0.162229	0.170088	0.24825	0.337248	0.35556	0.308541	0.273845	0.498592	0.337944	0.186862	0.184484	0.176321	0.153216	0.116323
rs15201342	MAGI2	417729	1	11552732	intron-variant	ss538088303	AX-75230252	A/G	0.393695	0.827672	0.189595	0.782299	0.961983	0.294354	0.223079	0.215337	0.844882	0.657994	0.0345695	0.609768	0.365843	0.541674	0.744611	0.165244	0.428214	0.238508	0.166387	0.313879	0.725051	0.690678	0.79218	0.39082	0.735507	0.386452	0.895415	0.96785	0.944334	0.805379	0.966884	0.961013	0.95383	0.953969	0.976361	0.930917	0.629294	0.847385	0.99748	0.973356	0.959299
rs15201339	MAGI2	417729	1	11553547	intron-variant	ss537962717	AX-80884137	A/T	0.787877	0.692851	0.233692	0.707771	0.841728	0.24883	0.415267	0.0771595	0.354742	0.407265	0.0233946	0.474496	0.921077	0.972993	0.494384	0.0102824	0.0442309	0.439667	0.0103665	0.728156	0.0276411	0.366086	0.233216	0.536119	0.653533	0.118388	0.388305	0.446167	0.491775	0.691188	0.534138	0.578385	0.627412	0.549858	0.692785	0.703073	0.934964	0.652533	0.52234	0.505374	0.511784
rs315139377	MAGI2	417729	1	11554401	intron-variant	ss537897419	AX-75230288	A/G	0.271178	0.312537	0.630832	0.279586	0.895277	0.485285	0.675731	0.961431	0.28839	0.794775	0.0335022	0.994467	0.575079	0.720818	0.960583	0.107893	0.512351	0.116121	0.107897	0.333889	0.438344	0.563908	0.615491	0.164014	0.519608	0.137893	0.472738	0.435197	0.458697	0.626912	0.638585	0.604135	0.645858	0.474967	0.732181	0.621437	0.582785	0.482743	0.430131	0.407637	0.365855
rs313643884	MAGI2	417729	1	11556331	intron-variant	ss538272911	AX-75230332	A/G	0.472479	0.788735	0.461371	0.621818	0.763374	0.31206	0.488956	0.607799	0.919772	0.538924	0.00658958	0.628408	0.886604	0.507947	0.648383	0.0206698	0.143113	0.175027	0.0206658	0.281411	0.139848	0.845956	0.234876	0.531507	0.773632	0.0719512	0.196157	0.180477	0.197214	0.343311	0.312623	0.279424	0.35095	0.252175	0.407282	0.332404	0.374982	0.294998	0.257475	0.250828	0.218997
rs14796165	MAGI2	417729	1	11557100	intron-variant	ss538014009	AX-75230346	A/G	0.271178	0.312537	0.630832	0.279586	0.895277	0.485285	0.7094	0.961431	0.28839	0.794775	0.0278131	0.994467	0.575079	0.720818	0.960583	0.107893	0.512351	0.116121	0.107897	0.333889	0.438344	0.563908	0.615491	0.164014	0.531731	0.137893	0.546825	0.509089	0.53634	0.717047	0.732324	0.693409	0.738208	0.55245	0.822213	0.700752	0.656639	0.551991	0.488502	0.460904	0.41129
rs312985739	MAGI2	417729	1	11558767	intron-variant	ss538237939	AX-75230383	C/T	0.54598	0.827861	0.95545	0.0942185	0.278324	0.705407	0.896481	0.06583	0.899627	0.515553	0.542655	0.338545	0.276389	0.110382	0.0477282	0.00882138	0.00826374	0.707741	0.00859827	0.798964	0.180391	0.619354	0.258457	0.557584	0.599588	0.0798755	0.8685	0.768782	0.804958	0.977392	0.963774	0.940593	0.919507	0.991483	0.856173	0.742622	0.871691	0.985701	0.978937	0.963072	0.984165
rs314025233	MAGI2	417729	1	11560648	intron-variant	ss537960122	AX-75230424	A/C	0.825585	0.86966	0.429349	0.225771	0.345988	0.59828	0.904918	0.0281214	0.737633	0.269975	0.29018	0.244773	0.395141	0.276487	0.112995	0.00217455	0.00278845	0.841965	0.00215295	0.529492	0.156497	0.71183	0.184159	0.336702	0.249847	0.113819	0.893022	0.805383	0.772679	0.631517	0.802016	0.815863	0.779425	0.909969	0.840096	0.656163	0.488396	0.707534	0.781741	0.754488	0.68567
rs317981407	MAGI2	417729	1	11566968	intron-variant	ss538235695	AX-75230550	A/G	0.61689	0.722432	0.776773	0.0386623	0.976605	0.737822	0.948805	0.824567	0.530654	0.214601	0.248745	0.254653	0.407184	0.77336	0.719348	0.447271	0.843196	0.177499	0.445584	0.500863	0.323616	0.471518	0.28536	0.285562	0.458991	0.0536519	0.597101	0.471008	0.475311	0.480702	0.595772	0.529152	0.50429	0.454605	0.640872	0.651518	0.410152	0.45176	0.482891	0.448122	0.39376
rs13833138	MAGI2	417729	1	11569675	intron-variant	ss538228692	AX-75230609	A/G	0.271178	0.312537	0.630832	0.279586	0.895277	0.485285	0.741537	0.961431	0.28839	0.794775	0.026464	0.994467	0.575079	0.720818	0.960583	0.107893	0.512351	0.116121	0.107897	0.333889	0.438344	0.563908	0.615491	0.164014	0.508974	0.137893	0.556591	0.520296	0.549129	0.733946	0.748143	0.710608	0.75578	0.568822	0.840524	0.721285	0.674437	0.563044	0.496472	0.467718	0.4152
rs13833135	MAGI2	417729	1	11571804	intron-variant	ss538239385	AX-80760410	C/G	0.375756	0.488741	0.627517	0.0907907	0.981621	0.689795	0.350473	0.465689	0.660241	0.144259	0.00613571	0.17618	0.652155	0.828543	0.593121	0.0786367	0.633291	0.0393666	0.0786261	0.297459	0.112072	0.633064	0.215029	0.473595	0.248616	0.0287134	0.563822	0.547078	0.585372	0.722761	0.713549	0.667065	0.749441	0.624389	0.840807	0.775496	0.77264	0.648036	0.569344	0.534543	0.463057
rs313415595	MAGI2	417729	1	11572801	intron-variant	ss537832972	AX-75230678	C/T	0.841029	0.882571	0.939628	0.990685	0.292412	0.516282	0.701067	0.0461916	0.592013	0.948992	0.171951	0.639954	0.695851	0.142245	0.3963	0.779223	0.284634	0.23236	0.776545	0.49602	0.430596	0.981515	0.42507	0.0124381	0.957715	0.597213	0.098754	0.0755306	0.0705346	0.0566654	0.0772632	0.0510387	0.0680524	0.0459113	0.067489	0.0600626	0.0398322	0.06003	0.0727679	0.0735368	0.0568011
rs316179081	MAGI2	417729	1	11572874	intron-variant	ss537714687	AX-75230681	C/T	0.841029	0.882571	0.939628	0.990685	0.292412	0.516282	0.71713	0.0461916	0.592013	0.948992	0.181391	0.639954	0.695851	0.142245	0.3963	0.779223	0.284634	0.23236	0.776545	0.49602	0.430596	0.981515	0.42507	0.0124381	0.969115	0.597213	0.0971699	0.0743171	0.0695202	0.0560252	0.0765027	0.0506832	0.0681121	0.0462779	0.0681907	0.060497	0.0402326	0.0604394	0.0731208	0.0740313	0.0570806
rs13833132	MAGI2	417729	1	11575745	intron-variant	ss538171717	AX-75230743	C/T	0.894356	0.755601	0.329669	0.739366	0.32591	0.57295	0.669334	0.528349	0.625749	0.606929	0.0764766	0.808578	0.76976	0.260696	0.621055	0.330814	0.815132	0.145202	0.33385	0.107217	0.304812	0.92694	0.305994	0.195433	0.437256	0.363932	0.274703	0.301059	0.28526	0.212276	0.120359	0.0740278	0.116473	0.0563478	0.0764491	0.114975	0.215466	0.210729	0.209192	0.22864	0.201975
rs315844220	MAGI2	417729	1	11575874	intron-variant	ss538125533	AX-80754867	C/G	0.221655	0.24541	0.707641	0.270873	0.982935	0.44623	0.818465	0.953913	0.369905	0.793955	0.043206	0.97711	0.61253	0.684035	0.963294	0.107387	0.502646	0.117663	0.10739	0.268921	0.436994	0.575033	0.668379	0.186599	0.415792	0.112543	0.699455	0.660153	0.690016	0.876751	0.88611	0.843565	0.899243	0.704533	0.997981	0.886303	0.854075	0.739331	0.667747	0.635537	0.571227
rs13833123	MAGI2	417729	1	11578473	intron-variant	ss538177842	AX-75230807	A/G	0.405597	0.429479	0.567146	0.847406	0.777737	0.280084	0.861196	0.714031	0.49966	0.594384	0.0359242	0.268728	0.951739	0.976763	0.372372	0.0476316	0.126268	0.465716	0.0476285	0.288084	0.270776	0.839826	0.508609	0.0822674	0.77169	0.177313	0.203236	0.17769	0.182643	0.28525	0.259235	0.23223	0.271075	0.17418	0.321787	0.274681	0.31786	0.25351	0.231123	0.23526	0.215209
rs15201264	MAGI2	417729	1	11580023	intron-variant	ss537958081	AX-75230836	C/T	0.942362	0.540363	0.743506	0.793642	0.670245	0.925582	0.940882	0.229006	0.452226	0.895904	0.549852	0.892596	0.601953	0.860812	0.928389	0.493721	0.567437	0.470884	0.49718	0.300181	0.92958	0.909906	0.420616	0.140752	0.996861	0.956275	0.486457	0.502381	0.495934	0.502241	0.46254	0.360105	0.41477	0.238085	0.31996	0.360272	0.436253	0.38873	0.388065	0.399071	0.399055
rs313216692	MAGI2	417729	1	11582037	intron-variant	ss537947359	AX-75230876	C/T	0.81351	0.458935	0.631247	0.351779	0.990914	0.497671	0.26052	0.337164	0.535784	0.107225	0.0315503	0.163094	0.750061	0.863114	0.851479	0.0249947	0.142053	0.174735	0.0249886	0.367613	0.10819	0.993504	0.0596947	0.755139	0.696351	0.0427089	0.245302	0.213925	0.228431	0.337607	0.381666	0.334871	0.342189	0.268831	0.440945	0.412382	0.447827	0.332058	0.303983	0.296764	0.289563
rs14796147	MAGI2	417729	1	11586153	intron-variant	ss537872827	AX-75230960	A/C	0.572208	0.267024	0.905826	0.593763	0.910852	0.867336	0.877308	0.578448	0.373877	0.355369	0.420197	0.281327	0.414899	0.597046	0.280267	0.759867	0.721883	0.105289	0.763925	0.259983	0.664426	0.394543	0.618628	0.438528	0.79581	0.833073	0.74488	0.715157	0.707783	0.785352	0.931634	0.962028	0.977757	0.702581	0.868857	0.949264	0.970936	0.965634	0.931367	0.897306	0.861613
rs312496445	MAGI2	417729	1	11591838	intron-variant	ss538048199	AX-75231073	C/T	0.0937255	0.807347	0.873539	0.504099	0.432207	0.454301	0.283253	0.604119	0.374927	0.0571859	0.687817	0.0299016	0.171173	0.0912574	0.480074	0.84115	0.918777	0.907022	0.841222	0.226795	0.920211	0.93504	0.243778	0.429921	0.660169	0.820553	0.999883	0.945036	0.966702	0.933071	0.895451	0.97024	0.739978	0.758277	0.824781	0.921295	0.933405	0.796158	0.786827	0.740073	0.801239
rs315929880	MAGI2	417729	1	11592685	intron-variant	ss538193534	AX-75231095	A/G	0.235408	0.593947	0.470019	0.72145	0.202074	0.486578	0.379869	0.498547	0.945315	0.71816	0.0203535	0.989315	0.426313	0.102099	0.40192	0.398297	0.914565	0.0723249	0.401509	0.13103	0.337168	0.997292	0.56059	0.223992	0.777148	0.279149	0.271534	0.290671	0.298163	0.343224	0.307526	0.240666	0.369887	0.239642	0.341627	0.280918	0.401804	0.368995	0.329561	0.332287	0.279692
rs314736543	MAGI2	417729	1	11596746	intron-variant	ss537784930	AX-75231186	C/T	0.526075	0.12729	0.817261	0.119027	0.667266	0.705548	0.418148	0.68416	0.72412	0.200927	0.0529545	0.351148	0.297511	0.218957	0.747656	0.115388	0.505724	0.107759	0.115388	0.420528	0.355428	0.424328	0.220077	0.273698	0.424213	0.0791111	0.530813	0.454647	0.467971	0.74053	0.863136	0.80461	0.739433	0.57523	0.864232	0.658298	0.58334	0.467809	0.433725	0.413241	0.411258
rs314647155	MAGI2	417729	1	11596791	intron-variant	ss537741663	AX-75231187	C/T	0.526075	0.12729	0.817261	0.119027	0.667266	0.705548	0.37976	0.68416	0.72412	0.200927	0.0762842	0.351148	0.297511	0.218957	0.747656	0.115388	0.505724	0.107759	0.115388	0.420528	0.355428	0.424328	0.220077	0.273698	0.409725	0.0791111	0.644879	0.578685	0.602867	0.80648	0.940304	0.881954	0.817572	0.65697	0.949015	0.826918	0.750798	0.603258	0.552156	0.520527	0.5033
rs15201201	MAGI2	417729	1	11598835	intron-variant	ss538290369	AX-75231232	C/T	0.855581	0.580427	0.623888	0.463523	0.281581	0.585295	0.625836	0.185245	0.80189	0.869999	0.687275	0.750335	0.355216	0.103615	0.0316439	0.0015714	0.000882652	0.751218	0.00155614	0.396751	0.351195	0.900642	0.349493	0.966351	0.411756	0.304232	0.786905	0.827433	0.843856	0.962504	0.862575	0.913248	0.927415	0.939975	0.98445	0.898151	0.798605	0.988058	0.950117	0.995861	0.952966
rs313003824	MAGI2	417729	1	11601594	intron-variant	ss538002601	AX-80936047	C/G	0.479077	0.193441	0.716259	0.652587	0.586233	0.88878	0.461421	0.0703178	0.426841	0.847665	0.37384	0.804045	0.691142	0.826259	0.0606785	0.170845	0.0267791	0.157393	0.170005	0.973474	0.716518	0.349618	0.86945	0.0255543	0.834994	0.864155	0.548514	0.426951	0.426405	0.448962	0.560475	0.548453	0.484446	0.415154	0.635528	0.43906	0.318625	0.348843	0.345367	0.299414	0.244773
rs312822765	MAGI2	417729	1	11604419	intron-variant	ss537737396	AX-75231361	A/C	0.558096	0.0717885	0.703394	0.305169	0.767618	0.872298	0.401842	0.742965	0.676899	0.0935039	0.0592352	0.188257	0.285714	0.213116	0.687444	0.0703899	0.452515	0.0816546	0.0703911	0.222532	0.280661	0.681811	0.0705267	0.253276	0.349813	0.0805479	0.291145	0.302026	0.322538	0.431033	0.571565	0.531057	0.477971	0.337698	0.565133	0.440978	0.417951	0.315786	0.279299	0.264682	0.215902
rs13833076	MAGI2	417729	1	11604881	intron-variant	ss538149003	AX-75231371	A/G	0.741896	0.313079	0.491162	0.0316179	0.183098	0.96801	0.429162	0.396711	0.269058	0.899026	0.445641	0.918526	0.0916676	0.00680122	0.320723	0.392839	0.338094	0.742611	0.389324	0.913316	0.912424	0.337092	0.882047	0.613924	0.46507	0.300908	0.447508	0.548753	0.551196	0.371981	0.219295	0.202747	0.337318	0.307872	0.224739	0.272567	0.514514	0.568396	0.553008	0.560936	0.506116
rs317969910	MAGI2	417729	1	11606515	intron-variant	ss537861375	AX-75231405	C/T	0.981869	0.400791	0.740528	0.497281	0.340357	0.819724	0.238338	0.0974079	0.815268	0.235629	0.0558578	0.504124	0.624887	0.266901	0.062353	0.815731	0.128257	0.0591054	0.813432	0.84434	0.420839	0.836503	0.109508	0.0420778	0.743106	0.463388	0.0302326	0.0268714	0.0284917	0.0241757	0.0362098	0.0350552	0.0355997	0.0280892	0.0597792	0.0333773	0.0325514	0.0361852	0.0353227	0.0303492	0.015989
rs14796128	MAGI2	417729	1	11611161	intron-variant	ss537776736	AX-75231505	A/G	0.289266	0.046857	0.528185	0.885252	0.488107	0.963601	0.48263	0.158123	0.305164	0.333149	0.341858	0.563044	0.263974	0.280139	0.168374	0.543284	0.565303	0.0377006	0.546801	0.153014	0.508265	0.631502	0.799318	0.0978437	0.474267	0.695798	0.65585	0.828859	0.857574	0.769326	0.8911	0.902462	0.918248	0.553969	0.883764	0.621218	0.725256	0.650426	0.582224	0.536918	0.426423
rs316319513	MAGI2	417729	1	11613692	intron-variant	ss538113804	AX-75231562	C/T	0.614713	0.576042	0.870148	0.678005	0.467446	0.377783	0.619414	0.135298	0.961003	0.137134	0.423988	0.269764	0.974448	0.492171	0.162578	0.97012	0.318529	0.134947	0.967612	0.61245	0.508551	0.790265	0.0383619	0.0754894	0.971955	0.605206	0.0777658	0.0763238	0.0753936	0.045771	0.0672803	0.0511541	0.0536264	0.0372386	0.0612806	0.0595258	0.0513649	0.0657719	0.0771756	0.073386	0.0477222
rs13833060	MAGI2	417729	1	11618149	intron-variant	ss538276135	AX-75231658	C/T	0.614713	0.576042	0.870148	0.678005	0.467446	0.377783	0.646741	0.135298	0.961003	0.137134	0.397931	0.269764	0.974448	0.492171	0.162578	0.97012	0.318529	0.134947	0.967612	0.61245	0.508551	0.790265	0.0383619	0.0754894	0.982279	0.605206	0.0795726	0.0783498	0.0775535	0.0471162	0.0691569	0.0523986	0.0545663	0.0374458	0.0621981	0.0604802	0.0519416	0.0666123	0.0773899	0.0731438	0.048196
rs312905808	MAGI2	417729	1	11620159	intron-variant	ss538256958	AX-75231703	A/G	0.894409	0.190844	0.746754	0.806323	0.742568	0.332309	0.986901	0.0542508	0.225906	0.427372	0.998158	0.709545	0.405485	0.570713	0.0873093	0.30804	0.07025	0.183177	0.306677	0.598138	0.694709	0.51337	0.362007	0.0212496	0.89293	0.975657	0.411409	0.394142	0.386777	0.297786	0.423746	0.368252	0.32895	0.24611	0.365254	0.30733	0.213485	0.267055	0.293306	0.269635	0.20596
rs312445071	MAGI2	417729	1	11620977	intron-variant	ss538023516	AX-75231726	A/G	0.170413	0.578115	0.569157	0.934109	0.77802	0.409617	0.826315	0.73955	0.293496	0.00975342	0.908446	0.00647495	0.194265	0.121223	0.345598	0.764607	0.907434	0.518498	0.764614	0.735148	0.937751	0.637976	0.0469774	0.591989	0.698877	0.990383	0.381169	0.478374	0.504267	0.410125	0.463853	0.517159	0.400979	0.41911	0.489792	0.500509	0.574089	0.491959	0.472904	0.425782	0.331132
rs316292612	MAGI2	417729	1	11621075	intron-variant	ss538094433	AX-75231730	G/T	0.525942	0.292079	0.284415	0.0104039	0.14782	0.291167	0.88024	0.0117149	0.489868	0.000408306	0.865532	0.000159611	0.0256318	0.004273	0.625529	0.177493	0.648595	0.267445	0.175465	0.993978	0.321087	0.394647	0.0605323	0.255074	0.249562	0.0438834	0.888186	0.889563	0.85437	0.800358	0.554772	0.504754	0.748647	0.648713	0.514022	0.527754	0.718857	0.85623	0.87318	0.931297	0.982104
[truncated: 51,322 more rows]
[truncated: 30 more columns]
