# Supplementary material for: Genome-wide association study and biological pathway analysis of the Eimeria maxima response in broilers
Source: Genet Sel Evol. 2015 Nov 25;47:91. doi: 10.1186/s12711-015-0170-0 (PMC4659166; doi:10.1186/s12711-015-0170-0)
Supplement: Supplementary file 5 — 10.1186/s12711-015-0170-0 Title: Descriptive statistics of the measured traits. Description: Descriptive statistics of the traits measured on the challenged animals during the large-scale challenge study. Plasma coloration was measured as absorbance (optical density) of blood plasma at different wavelengths. Oocyst count is expressed as the raw number of oocysts per gram of feces. Erythrocyte count is expressed in millions per mm3 (M∙mm−3). White blood cell and thrombocyte count is expressed in absolute number per mm3 (count∙mm−3. Lymphocytes and heterophils are also expressed in the percentage of total number of white blood cells. MCV, MCH and MCHC correspond to mean cellular volume, mean corpuscular hemoglobin and mean corpuscular hemoglobin concentration, respectively. [file 12711_2015_170_MOESM5_ESM.xlsx]

## Sheet: Additional file 5 Table S5
Parameters measured on all animals during the challenge
Parameter	Number of animals	Min.	Median	Mean	Max.	SD	CV
Body weight gain, (D15-D22)/D15	1853	3.759	68.13	67.25	125	11.6618	0.17341
Hematocrit	1853	14	30	30.03	46	4.17421	0.139001
Body temperature, °C	1853	39.5	41.5	41.42	43	0.41783	0.0100876
Plasma coloration, 380 nm	1853	0.22	0.614	0.7131	2.658	0.366212	0.513549
Plasma coloration, 385 nm	1853	0.228	0.675	0.7887	2.871	0.411135	0.521282
Plasma coloration, 390 nm	1853	0.243	0.758	0.8913	3.216	0.475427	0.533408
Plasma coloration, 395 nm	1853	0.275	0.918	1.094	3.784	0.61901	0.565822
Plasma coloration, 400 nm	1853	0.313	1.099	1.308	3.996	0.727676	0.556327
Plasma coloration, 405 nm	1853	0.373	1.343	1.569	3.975	0.790969	0.504123
Plasma coloration, 410 nm	1853	0.433	1.56	1.789	3.997	0.821218	0.459038
Plasma coloration, 415 nm	1853	0.447	1.573	1.794	3.985	0.809001	0.450948
Plasma coloration, 420 nm	1853	0.392	1.314	1.525	3.994	0.742732	0.487037
Plasma coloration, 425 nm	1853	0.324	1.047	1.218	3.885	0.629082	0.516488
Plasma coloration, 430 nm	1853	0.255	0.773	0.8866	3.094	0.428105	0.482861
Plasma coloration, 435 nm	1853	0.212	0.586	0.6694	2.419	0.319948	0.477962
Plasma coloration, 440 nm	1853	0.188	0.477	0.539	1.914	0.244833	0.454236
Plasma coloration, 445 nm	1853	0.176	0.423	0.4751	1.628	0.204789	0.431045
Plasma coloration, 450 nm	1853	0.168	0.372	0.4148	1.379	0.169405	0.408402
Plasma coloration, 455 nm	1853	0.163	0.347	0.3844	1.226	0.150243	0.390851
Plasma coloration, 460 nm	1853	0.155	0.317	0.3498	1.084	0.130831	0.374017
Plasma coloration, 465 nm	1853	0.147	0.295	0.3252	1.033	0.119871	0.368606
Plasma coloration, 470 nm	1853	0.138	0.273	0.302	0.972	0.110508	0.365921
Plasma coloration, 475 nm	1853	0.133	0.26	0.2886	0.924	0.106375	0.368591
Plasma coloration, 480 nm	1853	0.128	0.249	0.2767	0.867	0.100735	0.364058
Plasma coloration, 485 nm	1853	0.127	0.245	0.2739	0.878	0.102466	0.3741
Plasma coloration, 490 nm	1853	0.123	0.238	0.2654	0.84	0.0984007	0.370764
Plasma coloration, 495 nm	1853	0.119	0.229	0.2563	0.814	0.0964132	0.376173
Plasma coloration, 500 nm	1853	0.112	0.215	0.2411	0.788	0.093802	0.389059
Plasma coloration, 505 nm	1853	0.102	0.2005	0.2264	0.767	0.0912082	0.402863
Plasma coloration, 510 nm	1853	0.095	0.1885	0.2137	0.743	0.0890021	0.416481
Plasma coloration, 515 nm	1853	0.09	0.183	0.2083	0.736	0.089034	0.427431
Plasma coloration, 520 nm	1853	0.088	0.184	0.2107	0.788	0.0919802	0.436546
Plasma coloration, 525 nm	1853	0.088	0.196	0.2237	0.86	0.10039	0.448772
Plasma coloration, 530 nm	1853	0.089	0.208	0.2393	0.898	0.110193	0.460483
Plasma coloration, 535 nm	1853	0.09	0.2235	0.2597	1.029	0.125984	0.485115
Plasma coloration, 540 nm	1853	0.09	0.23	0.2684	1.054	0.132955	0.495363
Plasma coloration, 545 nm	1853	0.088	0.226	0.2628	1.035	0.130074	0.494956
Plasma coloration, 550 nm	1853	0.085	0.212	0.2453	0.931	0.117926	0.480741
Plasma coloration, 555 nm	1853	0.081	0.19	0.2179	0.853	0.100903	0.46307
Plasma coloration, 560 nm	1853	0.079	0.181	0.2071	0.796	0.0941284	0.454507
Plasma coloration, 565 nm	1853	0.079	0.183	0.2106	0.826	0.0973422	0.462214
Plasma coloration, 570 nm	1853	0.079	0.193	0.2243	0.829	0.106835	0.476304
Plasma coloration, 575 nm	1853	0.078	0.2095	0.2446	0.958	0.123655	0.505541
Plasma coloration, 580 nm	1853	0.077	0.21	0.2451	0.974	0.125458	0.511864
Plasma coloration, 585 nm	1853	0.071	0.179	0.2081	0.827	0.100695	0.483876
Plasma coloration, 590 nm	1853	0.064	0.14	0.1605	0.544	0.0701801	0.437259
Plasma coloration, 595 nm	1853	0.061	0.115	0.1295	0.396	0.0521215	0.402482
Plasma coloration, 600 nm	1853	0.058	0.104	0.1168	0.362	0.0454727	0.389321
Parameter measured on the subset of 176 animals
Classical parameters
Parameter	Number of animals	Min.	Median	Mean	Max.	SD	CV
Duodenum lesion score	176	0	1	1.206	3	0.904891	0.750325
Jejunum lesion score	176	0	2	2.019	4	0.98077	0.48577
Oocyst count, OPG	176	1200	27000	38710	228000	35349.3	0.913183
Blood Composition (BC)
Parameter	Number of animals	Min.	Median	Mean	Max.	SD	CV
Erythrocytes	176	1.32	2.08	2.09	2.93	0.281297	0.134592
Leukocytes	176	3349	25450	30530	90990	17495.3	0.573053
Heterophils, %	176	0.1951	0.5179	0.5258	0.9556	0.178584	0.339642
Lymphocytes %	176	0.0444	0.4821	0.4742	0.8049	0.178584	0.3766
Heterophiles, N	176	2568	12900	14810	65820	8903.87	0.601207
Lymphocytes, N	176	460	12100	15260	54690	11541.7	0.756336
Thrombocytes	176	58000	124000	127100	197000	27214.4	0.214118
Hemoglobin, g/dl	176	5.2	9.5	9.512	13.1	1.2966	0.136312
MCV, fl	176	126	139	138.8	151	4.97616	0.0358513
MCH, pg	176	39.4	45.5	45.48	51.9	1.88426	0.0414305
MCHC, g∙dl-1	176	26.1	32.7	32.79	37	1.53966	0.0469552
Plasma Protein Profile (PPP)
Parameter	Number of animals	Min.	Median	Mean	Max.	SD	CV
Plasma protein, g∙dl-1	176	16	24	24.81	58	5.82409	0.234747
Prealbumin, %	176	1.603	4.767	5.466	16.12	2.78723	0.509921
Albumin, %	176	24.04	49.41	48.45	63.08	6.0772	0.125432
α1-globulin, %	176	2.755	4.387	4.67	7.761	1.04696	0.224187
α2-globulin, %	176	5.065	6.536	6.747	9.49	0.873321	0.129438
α3-globulin, %	176	3.942	7.283	7.493	14.85	1.79296	0.239284
β1-globulin, %	176	5.844	14.03	14.38	24.48	2.78821	0.193895
β2-globulin, %	176	5.808	8.441	8.772	19.54	1.91637	0.218464
γ-globulin, %	176	2.155	3.656	3.914	9.111	1.23208	0.314789
