# Supplementary material for: Genome-wide association study and biological pathway analysis of the Eimeria maxima response in broilers
Source: Genet Sel Evol. 2015 Nov 25;47:91. doi: 10.1186/s12711-015-0170-0 (PMC4659166; doi:10.1186/s12711-015-0170-0)
Supplement: Supplementary file 10 — 10.1186/s12711-015-0170-0 Title: List of biological pathways significantly enriched with genes in genomic regions associated with measured traits. Description: Results for the biological pathway significantly (P < 0.05) enriched with genes in genomic regions associated with measured traits during the large-scale challenge study. The p-values provided in the table represent values for the one-sided test for overlapping SNPs after 1000 permutations. [file 12711_2015_170_MOESM10_ESM.xlsx]

## Sheet: Additional file 10 Table S7
Parameter	Pathway	KEGG Pathway ID	P value
Body weight gain	Glycosaminoglycan biosynthesis - heparan sulfate / heparin	gga00534	0.011
Body weight gain	Glycerolipid metabolism	gga00561	0.02
Body weight gain	Sphingolipid metabolism	gga00600	0.02
Body weight gain	Primary bile acid biosynthesis	gga00120	0.032
Body weight gain	Melanogenesis	gga04916	0.032
Body weight gain	Proteasome	gga03050	0.044
Body weight gain	Regulation of autophagy	gga04140	0.047
Body temperature	Metabolic pathways	gga01100	0.002
Body temperature	ErbB signaling pathway	gga04012	0.003
Body temperature	Other glycan degradation	gga00511	0.011
Body temperature	Retinol metabolism	gga00830	0.011
Body temperature	ABC transporters	gga02010	0.021
Body temperature	Alanine, aspartate and glutamate metabolism	gga00250	0.023
Body temperature	Tryptophan metabolism	gga00380	0.026
Body temperature	Peroxisome	gga04146	0.031
Body temperature	Glycosaminoglycan degradation	gga00531	0.034
Body temperature	Tyrosine metabolism	gga00350	0.035
Body temperature	Endocytosis	gga04144	0.035
Body temperature	Glycosylphosphatidylinositol(GPI)-anchor biosynthesis	gga00563	0.036
Body temperature	Lysosome	gga04142	0.044
Hematocrite	Vascular smooth muscle contraction	gga04270	0
Hematocrite	Pantothenate and CoA biosynthesis	gga00770	0.004
Hematocrite	Primary bile acid biosynthesis	gga00120	0.01
Hematocrite	Steroid hormone biosynthesis	gga00140	0.025
Hematocrite	MAPK signaling pathway	gga04010	0.026
Hematocrite	Cardiac muscle contraction	gga04260	0.026
Hematocrite	Ubiquinone and other terpenoid-quinone biosynthesis	gga00130	0.031
Hematocrite	Taurine and hypotaurine metabolism	gga00430	0.032
Hematocrite	Glycine, serine and threonine metabolism	gga00260	0.037
Hematocrite	Adrenergic signaling in cardiomyocytes	gga04261	0.039
Hematocrite	Pyruvate metabolism	gga00620	0.045
Hematocrite	SNARE interactions in vesicular transport	gga04130	0.045
Plasma coloration, 380 nm	Glycosphingolipid biosynthesis - globo series	gga00603	0.047
Plasma coloration, 380 nm	Glycosphingolipid biosynthesis - lacto and neolacto series	gga00601	0.038
Plasma coloration, 380 nm	Phenylalanine, tyrosine and tryptophan biosynthesis	gga00400	0.01
Plasma coloration, 380 nm	Purine metabolism	gga00230	0.043
Plasma coloration, 380 nm	Spliceosome	gga03040	0.047
Plasma coloration, 385 nm	Phenylalanine, tyrosine and tryptophan biosynthesis	gga00400	0.02
Plasma coloration, 390 nm	Phenylalanine, tyrosine and tryptophan biosynthesis	gga00400	0.012
Plasma coloration, 395 nm	Glycosphingolipid biosynthesis - lacto and neolacto series	gga00601	0.043
Plasma coloration, 395 nm	Phenylalanine, tyrosine and tryptophan biosynthesis	gga00400	0.006
Plasma coloration, 395 nm	Purine metabolism	gga00230	0.039
Plasma coloration, 400 nm	Glyoxylate and dicarboxylate metabolism	gga00630	0.035
Plasma coloration, 400 nm	Phenylalanine, tyrosine and tryptophan biosynthesis	gga00400	0.008
Plasma coloration, 400 nm	Wnt signaling pathway	gga04310	0.034
Plasma coloration, 405 nm	Glyoxylate and dicarboxylate metabolism	gga00630	0.035
Plasma coloration, 405 nm	Peroxisome	gga04146	0.049
Plasma coloration, 405 nm	Phenylalanine, tyrosine and tryptophan biosynthesis	gga00400	0.016
Plasma coloration, 405 nm	Purine metabolism	gga00230	0.041
Plasma coloration, 410 nm	Glyoxylate and dicarboxylate metabolism	gga00630	0.034
Plasma coloration, 410 nm	Phenylalanine, tyrosine and tryptophan biosynthesis	gga00400	0.018
Plasma coloration, 415 nm	Phenylalanine, tyrosine and tryptophan biosynthesis	gga00400	0.005
Plasma coloration, 415 nm	Purine metabolism	gga00230	0.033
Plasma coloration, 415 nm	Steroid biosynthesis	gga00100	0.046
Plasma coloration, 420 nm	Phenylalanine, tyrosine and tryptophan biosynthesis	gga00400	0.013
Plasma coloration, 420 nm	Purine metabolism	gga00230	0.046
Plasma coloration, 425 nm	Phenylalanine, tyrosine and tryptophan biosynthesis	gga00400	0.005
Plasma coloration, 425 nm	Purine metabolism	gga00230	0.041
Plasma coloration, 425 nm	Spliceosome	gga03040	0.026
Plasma coloration, 430 nm	Phenylalanine, tyrosine and tryptophan biosynthesis	gga00400	0.005
Plasma coloration, 430 nm	Purine metabolism	gga00230	0.047
Plasma coloration, 430 nm	Spliceosome	gga03040	0.023
Plasma coloration, 430 nm	Steroid biosynthesis	gga00100	0.029
Plasma coloration, 435 nm	Glycosphingolipid biosynthesis - lacto and neolacto series	gga00601	0.04
Plasma coloration, 435 nm	Phenylalanine, tyrosine and tryptophan biosynthesis	gga00400	0.011
Plasma coloration, 435 nm	Purine metabolism	gga00230	0.03
Plasma coloration, 435 nm	Spliceosome	gga03040	0.021
Plasma coloration, 435 nm	Steroid biosynthesis	gga00100	0.043
Plasma coloration, 440 nm	Glycosphingolipid biosynthesis - lacto and neolacto series	gga00601	0.049
Plasma coloration, 440 nm	Phenylalanine, tyrosine and tryptophan biosynthesis	gga00400	0.02
Plasma coloration, 440 nm	Purine metabolism	gga00230	0.043
Plasma coloration, 440 nm	Spliceosome	gga03040	0.035
Plasma coloration, 445 nm	Glycosphingolipid biosynthesis - lacto and neolacto series	gga00601	0.041
Plasma coloration, 445 nm	Phenylalanine, tyrosine and tryptophan biosynthesis	gga00400	0.017
Plasma coloration, 445 nm	Purine metabolism	gga00230	0.045
Plasma coloration, 445 nm	Spliceosome	gga03040	0.022
Plasma coloration, 450 nm	Caffeine metabolism	gga00232	0.029
Plasma coloration, 450 nm	Endocytosis	gga04144	0.03
Plasma coloration, 450 nm	p53 signaling pathway	gga04115	0.048
Plasma coloration, 450 nm	Phenylalanine, tyrosine and tryptophan biosynthesis	gga00400	0.032
Plasma coloration, 450 nm	Purine metabolism	gga00230	0.046
Plasma coloration, 450 nm	Spliceosome	gga03040	0.036
Plasma coloration, 455 nm	Caffeine metabolism	gga00232	0.031
Plasma coloration, 455 nm	Endocytosis	gga04144	0.025
Plasma coloration, 455 nm	p53 signaling pathway	gga04115	0.045
Plasma coloration, 455 nm	Phenylalanine, tyrosine and tryptophan biosynthesis	gga00400	0.04
Plasma coloration, 455 nm	Spliceosome	gga03040	0.04
Plasma coloration, 460 nm	Caffeine metabolism	gga00232	0.031
Plasma coloration, 460 nm	Endocytosis	gga04144	0.032
Plasma coloration, 460 nm	Hedgehog signaling pathway	gga04340	0.045
Plasma coloration, 460 nm	p53 signaling pathway	gga04115	0.027
Plasma coloration, 460 nm	Phenylalanine, tyrosine and tryptophan biosynthesis	gga00400	0.039
Plasma coloration, 465 nm	Caffeine metabolism	gga00232	0.032
Plasma coloration, 465 nm	Endocytosis	gga04144	0.016
Plasma coloration, 465 nm	Ether lipid metabolism	gga00565	0.049
Plasma coloration, 465 nm	p53 signaling pathway	gga04115	0.033
Plasma coloration, 465 nm	Phenylalanine, tyrosine and tryptophan biosynthesis	gga00400	0.025
Plasma coloration, 470 nm	Caffeine metabolism	gga00232	0.024
Plasma coloration, 470 nm	Endocytosis	gga04144	0.013
Plasma coloration, 470 nm	FoxO signaling pathway	gga04068	0.035
Plasma coloration, 470 nm	Hedgehog signaling pathway	gga04340	0.049
Plasma coloration, 470 nm	p53 signaling pathway	gga04115	0.026
Plasma coloration, 470 nm	Phenylalanine, tyrosine and tryptophan biosynthesis	gga00400	0.013
Plasma coloration, 470 nm	Spliceosome	gga03040	0.049
Plasma coloration, 475 nm	Caffeine metabolism	gga00232	0.016
Plasma coloration, 475 nm	Endocytosis	gga04144	0.019
Plasma coloration, 475 nm	Ether lipid metabolism	gga00565	0.026
Plasma coloration, 475 nm	FoxO signaling pathway	gga04068	0.038
Plasma coloration, 475 nm	Hedgehog signaling pathway	gga04340	0.035
Plasma coloration, 475 nm	p53 signaling pathway	gga04115	0.024
Plasma coloration, 475 nm	Phenylalanine, tyrosine and tryptophan biosynthesis	gga00400	0.019
Plasma coloration, 475 nm	RNA transport	gga03013	0.04
Plasma coloration, 475 nm	Spliceosome	gga03040	0.043
Plasma coloration, 480 nm	Caffeine metabolism	gga00232	0.021
Plasma coloration, 480 nm	Endocytosis	gga04144	0.018
Plasma coloration, 480 nm	Ether lipid metabolism	gga00565	0.028
Plasma coloration, 480 nm	FoxO signaling pathway	gga04068	0.017
Plasma coloration, 480 nm	Hedgehog signaling pathway	gga04340	0.045
Plasma coloration, 480 nm	p53 signaling pathway	gga04115	0.017
Plasma coloration, 480 nm	Phenylalanine, tyrosine and tryptophan biosynthesis	gga00400	0.015
Plasma coloration, 480 nm	RNA transport	gga03013	0.036
Plasma coloration, 485 nm	Caffeine metabolism	gga00232	0.03
Plasma coloration, 485 nm	Endocytosis	gga04144	0.04
Plasma coloration, 485 nm	Ether lipid metabolism	gga00565	0.02
Plasma coloration, 485 nm	Hedgehog signaling pathway	gga04340	0.03
Plasma coloration, 485 nm	MAPK signaling pathway	gga04010	0.033
Plasma coloration, 485 nm	p53 signaling pathway	gga04115	0.032
Plasma coloration, 485 nm	Phenylalanine, tyrosine and tryptophan biosynthesis	gga00400	0.036
Plasma coloration, 490 nm	Caffeine metabolism	gga00232	0.04
Plasma coloration, 490 nm	Endocytosis	gga04144	0.042
Plasma coloration, 490 nm	Ether lipid metabolism	gga00565	0.026
Plasma coloration, 490 nm	MAPK signaling pathway	gga04010	0.042
Plasma coloration, 490 nm	p53 signaling pathway	gga04115	0.022
Plasma coloration, 490 nm	Phenylalanine, tyrosine and tryptophan biosynthesis	gga00400	0.026
Plasma coloration, 495 nm	Endocytosis	gga04144	0.035
Plasma coloration, 495 nm	Ether lipid metabolism	gga00565	0.025
Plasma coloration, 495 nm	FoxO signaling pathway	gga04068	0.041
Plasma coloration, 495 nm	p53 signaling pathway	gga04115	0.038
Plasma coloration, 495 nm	Phenylalanine, tyrosine and tryptophan biosynthesis	gga00400	0.032
Plasma coloration, 500 nm	Caffeine metabolism	gga00232	0.038
Plasma coloration, 500 nm	Endocytosis	gga04144	0.039
Plasma coloration, 500 nm	Ether lipid metabolism	gga00565	0.025
Plasma coloration, 500 nm	FoxO signaling pathway	gga04068	0.045
Plasma coloration, 500 nm	MAPK signaling pathway	gga04010	0.041
Plasma coloration, 500 nm	p53 signaling pathway	gga04115	0.039
Plasma coloration, 500 nm	Phenylalanine, tyrosine and tryptophan biosynthesis	gga00400	0.035
Plasma coloration, 505 nm	Caffeine metabolism	gga00232	0.038
Plasma coloration, 505 nm	Endocytosis	gga04144	0.03
Plasma coloration, 505 nm	Ether lipid metabolism	gga00565	0.035
Plasma coloration, 505 nm	Phenylalanine, tyrosine and tryptophan biosynthesis	gga00400	0.02
Plasma coloration, 510 nm	Endocytosis	gga04144	0.032
Plasma coloration, 510 nm	Ether lipid metabolism	gga00565	0.033
Plasma coloration, 510 nm	Phenylalanine, tyrosine and tryptophan biosynthesis	gga00400	0.02
Plasma coloration, 515 nm	Endocytosis	gga04144	0.041
Plasma coloration, 515 nm	Ether lipid metabolism	gga00565	0.036
Plasma coloration, 515 nm	Lysine degradation	gga00310	0.044
Plasma coloration, 515 nm	Phenylalanine, tyrosine and tryptophan biosynthesis	gga00400	0.018
Plasma coloration, 520 nm	Endocytosis	gga04144	0.029
Plasma coloration, 520 nm	Ether lipid metabolism	gga00565	0.033
Plasma coloration, 520 nm	Hedgehog signaling pathway	gga04340	0.035
Plasma coloration, 520 nm	Phenylalanine, tyrosine and tryptophan biosynthesis	gga00400	0.01
Plasma coloration, 525 nm	Caffeine metabolism	gga00232	0.035
Plasma coloration, 525 nm	Endocytosis	gga04144	0.021
Plasma coloration, 525 nm	Phenylalanine, tyrosine and tryptophan biosynthesis	gga00400	0.007
Plasma coloration, 525 nm	Spliceosome	gga03040	0.049
Plasma coloration, 530 nm	Endocytosis	gga04144	0.028
Plasma coloration, 530 nm	Glycosphingolipid biosynthesis - lacto and neolacto series	gga00601	0.046
Plasma coloration, 530 nm	Phenylalanine, tyrosine and tryptophan biosynthesis	gga00400	0.02
Plasma coloration, 530 nm	Purine metabolism	gga00230	0.032
Plasma coloration, 535 nm	Endocytosis	gga04144	0.04
Plasma coloration, 535 nm	Glycosphingolipid biosynthesis - lacto and neolacto series	gga00601	0.041
Plasma coloration, 535 nm	Phenylalanine, tyrosine and tryptophan biosynthesis	gga00400	0.017
Plasma coloration, 540 nm	Glycosphingolipid biosynthesis - lacto and neolacto series	gga00601	0.04
Plasma coloration, 540 nm	Phenylalanine, tyrosine and tryptophan biosynthesis	gga00400	0.027
Plasma coloration, 545 nm	Glycosphingolipid biosynthesis - globo series	gga00603	0.049
Plasma coloration, 545 nm	Glycosphingolipid biosynthesis - lacto and neolacto series	gga00601	0.033
Plasma coloration, 545 nm	Phenylalanine, tyrosine and tryptophan biosynthesis	gga00400	0.016
Plasma coloration, 545 nm	Purine metabolism	gga00230	0.047
Plasma coloration, 550 nm	Glycosphingolipid biosynthesis - lacto and neolacto series	gga00601	0.04
Plasma coloration, 550 nm	Phenylalanine, tyrosine and tryptophan biosynthesis	gga00400	0.014
Plasma coloration, 550 nm	Purine metabolism	gga00230	0.033
Plasma coloration, 555 nm	Endocytosis	gga04144	0.038
Plasma coloration, 555 nm	Glycosphingolipid biosynthesis - lacto and neolacto series	gga00601	0.042
Plasma coloration, 555 nm	Phenylalanine, tyrosine and tryptophan biosynthesis	gga00400	0.012
Plasma coloration, 555 nm	Purine metabolism	gga00230	0.044
Plasma coloration, 560 nm	Endocytosis	gga04144	0.038
Plasma coloration, 560 nm	Glycosphingolipid biosynthesis - lacto and neolacto series	gga00601	0.049
Plasma coloration, 560 nm	Phenylalanine, tyrosine and tryptophan biosynthesis	gga00400	0.011
Plasma coloration, 560 nm	Purine metabolism	gga00230	0.044
Plasma coloration, 565 nm	Endocytosis	gga04144	0.048
Plasma coloration, 565 nm	Glycosphingolipid biosynthesis - lacto and neolacto series	gga00601	0.047
Plasma coloration, 565 nm	Phenylalanine, tyrosine and tryptophan biosynthesis	gga00400	0.008
Plasma coloration, 565 nm	Purine metabolism	gga00230	0.035
Plasma coloration, 570 nm	Glycosphingolipid biosynthesis - lacto and neolacto series	gga00601	0.035
Plasma coloration, 570 nm	Phenylalanine, tyrosine and tryptophan biosynthesis	gga00400	0.018
Plasma coloration, 570 nm	Purine metabolism	gga00230	0.036
Plasma coloration, 575 nm	Glycosphingolipid biosynthesis - lacto and neolacto series	gga00601	0.045
Plasma coloration, 575 nm	Phenylalanine, tyrosine and tryptophan biosynthesis	gga00400	0.012
Plasma coloration, 575 nm	Purine metabolism	gga00230	0.038
Plasma coloration, 580 nm	Glycosphingolipid biosynthesis - globo series	gga00603	0.04
Plasma coloration, 580 nm	Glycosphingolipid biosynthesis - lacto and neolacto series	gga00601	0.027
Plasma coloration, 580 nm	Phenylalanine, tyrosine and tryptophan biosynthesis	gga00400	0.015
Plasma coloration, 580 nm	Purine metabolism	gga00230	0.041
Plasma coloration, 585 nm	Phenylalanine, tyrosine and tryptophan biosynthesis	gga00400	0.011
Plasma coloration, 585 nm	Purine metabolism	gga00230	0.023
Plasma coloration, 590 nm	Endocytosis	gga04144	0.033
Plasma coloration, 590 nm	Phenylalanine, tyrosine and tryptophan biosynthesis	gga00400	0.013
Plasma coloration, 595 nm	Adherens junction	gga04520	0.023
Plasma coloration, 595 nm	Endocytosis	gga04144	0.048
Plasma coloration, 595 nm	Ether lipid metabolism	gga00565	0.025
Plasma coloration, 595 nm	Hedgehog signaling pathway	gga04340	0.034
Plasma coloration, 595 nm	MAPK signaling pathway	gga04010	0.048
Plasma coloration, 595 nm	Non-homologous end-joining	gga03450	0.042
Plasma coloration, 595 nm	Phenylalanine, tyrosine and tryptophan biosynthesis	gga00400	0.012
Plasma coloration, 600 nm	Adherens junction	gga04520	0.016
Plasma coloration, 600 nm	Ether lipid metabolism	gga00565	0.019
Plasma coloration, 600 nm	Lysine degradation	gga00310	0.042
Plasma coloration, 600 nm	Non-homologous end-joining	gga03450	0.006
Plasma coloration, 600 nm	Phenylalanine, tyrosine and tryptophan biosynthesis	gga00400	0.011
Parameters measuer on the subset of animals
Plasma protein composition
Prealbumin, %	Glycosylphosphatidylinositol(GPI)-anchor biosynthesis	gga00563	0.004
Prealbumin, %	Glycosaminoglycan biosynthesis - chondroitin sulfate / dermatan sulfate	gga00532	0.018
Prealbumin, %	Mucin type O-Glycan biosynthesis	gga00512	0.025
Prealbumin, %	Amino sugar and nucleotide sugar metabolism	gga00520	0.049
Albumin, %	Amino sugar and nucleotide sugar metabolism	gga00520	0.001
Albumin, %	Protein export	gga03060	0.002
Albumin, %	Glycolysis / Gluconeogenesis	gga00010	0.014
Albumin, %	Pentose phosphate pathway	gga00030	0.016
Albumin, %	Renin-angiotensin system	gga04614	0.016
Albumin, %	Glycosylphosphatidylinositol(GPI)-anchor biosynthesis	gga00563	0.039
Albumin, %	mRNA surveillance pathway	gga03015	0.044
Albumin, %	Glycosaminoglycan biosynthesis - chondroitin sulfate / dermatan sulfate	gga00532	0.047
α1-globulin, %	Protein export	gga03060	0.001
α1-globulin, %	Purine metabolism	gga00230	0.007
α1-globulin, %	Arginine and proline metabolism	gga00330	0.009
α1-globulin, %	mTOR signaling pathway	gga04150	0.014
α1-globulin, %	Intestinal immune network for IgA production	gga04672	0.021
α1-globulin, %	Progesterone-mediated oocyte maturation	gga04914	0.023
α1-globulin, %	Influenza A	gga05164	0.023
α1-globulin, %	N-Glycan biosynthesis	gga00510	0.032
α1-globulin, %	Glycosaminoglycan biosynthesis - heparan sulfate / heparin	gga00534	0.036
α1-globulin, %	Glycosaminoglycan biosynthesis - chondroitin sulfate / dermatan sulfate	gga00532	0.04
α2-globulin, %	Inositol phosphate metabolism	gga00562	0.004
α2-globulin, %	Glutathione metabolism	gga00480	0.014
α2-globulin, %	Sphingolipid metabolism	gga00600	0.014
α2-globulin, %	Insulin signaling pathway	gga04910	0.025
α2-globulin, %	mTOR signaling pathway	gga04150	0.029
α2-globulin, %	Phosphatidylinositol signaling system	gga04070	0.031
α2-globulin, %	Basal transcription factors	gga03022	0.038
α2-globulin, %	Ether lipid metabolism	gga00565	0.045
α2-globulin, %	Pentose phosphate pathway	gga00030	0.046
α2-globulin, %	Purine metabolism	gga00230	0.049
α3-globulin, %	Spliceosome	gga03040	0.005
α3-globulin, %	Nucleotide excision repair	gga03420	0.02
α3-globulin, %	Homologous recombination	gga03440	0.037
α3-globulin, %	Pantothenate and CoA biosynthesis	gga00770	0.04
β1-globulin, %	Influenza A	gga05164	0.01
β1-globulin, %	Renin-angiotensin system	gga04614	0.018
β1-globulin, %	Amino sugar and nucleotide sugar metabolism	gga00520	0.023
β1-globulin, %	Jak-STAT signaling pathway	gga04630	0.027
β1-globulin, %	Neuroactive ligand-receptor interaction	gga04080	0.029
β1-globulin, %	Pentose phosphate pathway	gga00030	0.037
β1-globulin, %	Glycolysis / Gluconeogenesis	gga00010	0.039
β1-globulin, %	RNA degradation	gga03018	0.042
β1-globulin, %	Spliceosome	gga03040	0.047
β2-globulin, %	Vascular smooth muscle contraction	gga04270	0
β2-globulin, %	Glycosaminoglycan biosynthesis - chondroitin sulfate / dermatan sulfate	gga00532	0.007
β2-globulin, %	Dorso-ventral axis formation	gga04320	0.03
β2-globulin, %	Pentose phosphate pathway	gga00030	0.046
γ-globulin, %	Influenza A	gga05164	0.02
γ-globulin, %	Glycerolipid metabolism	gga00561	0.034
Protein content, g/L	Taurine and hypotaurine metabolism	gga00430	0.017
Protein content, g/L	Wnt signaling pathway	gga04310	0.022
Protein content, g/L	Melanogenesis	gga04916	0.026
Protein content, g/L	Focal adhesion	gga04510	0.027
Protein content, g/L	Adrenergic signaling in cardiomyocytes	gga04261	0.032
Protein content, g/L	Non-homologous end-joining	gga03450	0.037
Protein content, g/L	Inositol phosphate metabolism	gga00562	0.038
Protein content, g/L	ErbB signaling pathway	gga04012	0.039
Protein content, g/L	VEGF signaling pathway	gga04370	0.042
Protein content, g/L	Cardiac muscle contraction	gga04260	0.043
Blood components
MCV	Primary bile acid biosynthesis	gga00120	0.016
MCV	Purine metabolism	gga00230	0.021
MCV	Steroid hormone biosynthesis	gga00140	0.025
MCV	Aminoacyl-tRNA biosynthesis	gga00970	0.028
MCV	ABC transporters	gga02010	0.03
MCV	Glycine, serine and threonine metabolism	gga00260	0.033
MCV	Sulfur relay system	gga04122	0.037
MCV	Vascular smooth muscle contraction	gga04270	0.039
MCV	Sulfur metabolism	gga00920	0.049
MCH	Vascular smooth muscle contraction	gga04270	0.001
MCH	Protein export	gga03060	0.011
MCH	Mucin type O-Glycan biosynthesis	gga00512	0.031
MCH	Purine metabolism	gga00230	0.036
MCH	Inositol phosphate metabolism	gga00562	0.047
MCHC	Purine metabolism	gga00230	0.014
MCHC	Ubiquitin mediated proteolysis	gga04120	0.015
MCHC	Ribosome biogenesis in eukaryotes	gga03008	0.02
MCHC	Glycosaminoglycan biosynthesis - chondroitin sulfate / dermatan sulfate	gga00532	0.023
MCHC	Endocytosis	gga04144	0.031
MCHC	Fanconi anemia pathway	gga03460	0.038
MCHC	Salmonella infection	gga05132	0.044
MCHC	Fructose and mannose metabolism	gga00051	0.049
MCHC	Caffeine metabolism	gga00232	0.049
Hemoglobin, g/dl	ABC transporters	gga02010	0.001
Hemoglobin, g/dl	Glycosaminoglycan biosynthesis - heparan sulfate / heparin	gga00534	0.003
Hemoglobin, g/dl	Homologous recombination	gga03440	0.004
Hemoglobin, g/dl	Peroxisome	gga04146	0.008
Hemoglobin, g/dl	Non-homologous end-joining	gga03450	0.01
Hemoglobin, g/dl	Mismatch repair	gga03430	0.014
Hemoglobin, g/dl	Valine, leucine and isoleucine degradation	gga00280	0.016
Hemoglobin, g/dl	Nucleotide excision repair	gga03420	0.033
Hemoglobin, g/dl	RNA transport	gga03013	0.046
Erythorcytes	Glycosaminoglycan biosynthesis - heparan sulfate / heparin	gga00534	0
Erythorcytes	ABC transporters	gga02010	0
Erythorcytes	2-Oxocarboxylic acid metabolism	gga01210	0.002
Erythorcytes	Purine metabolism	gga00230	0.011
Erythorcytes	Non-homologous end-joining	gga03450	0.019
Erythorcytes	Peroxisome	gga04146	0.02
Erythorcytes	Cardiac muscle contraction	gga04260	0.026
Erythorcytes	Homologous recombination	gga03440	0.034
Erythorcytes	Adrenergic signaling in cardiomyocytes	gga04261	0.042
Erythorcytes	Endocytosis	gga04144	0.046
Leukocytes	Glycosphingolipid biosynthesis - ganglio series	gga00604	0.017
Leukocytes	Glycosaminoglycan biosynthesis - heparan sulfate / heparin	gga00534	0.018
Leukocytes	Phenylalanine, tyrosine and tryptophan biosynthesis	gga00400	0.02
Leukocytes	2-Oxocarboxylic acid metabolism	gga01210	0.02
Leukocytes	Regulation of autophagy	gga04140	0.02
Leukocytes	Lysine degradation	gga00310	0.024
Leukocytes	ECM-receptor interaction	gga04512	0.028
Leukocytes	Glycosphingolipid biosynthesis - lacto and neolacto series	gga00601	0.031
Leukocytes	Glycosphingolipid biosynthesis - globo series	gga00603	0.032
Leukocytes	Wnt signaling pathway	gga04310	0.04
Leukocytes	Glycosaminoglycan biosynthesis - keratan sulfate	gga00533	0.047
Lymphocytes, %	Peroxisome	gga04146	0.006
Lymphocytes, %	Lysosome	gga04142	0.008
Lymphocytes, %	Nicotinate and nicotinamide metabolism	gga00760	0.01
Lymphocytes, %	Ether lipid metabolism	gga00565	0.012
Lymphocytes, %	Phagosome	gga04145	0.012
Lymphocytes, %	Gap junction	gga04540	0.014
Lymphocytes, %	Metabolic pathways	gga01100	0.015
Lymphocytes, %	Nucleotide excision repair	gga03420	0.016
Lymphocytes, %	Pentose phosphate pathway	gga00030	0.017
Lymphocytes, %	Glycerolipid metabolism	gga00561	0.023
Lymphocytes, %	Glycosaminoglycan degradation	gga00531	0.029
Lymphocytes, %	Glycosylphosphatidylinositol(GPI)-anchor biosynthesis	gga00563	0.037
Lymphocytes, %	Mismatch repair	gga03430	0.037
Lymphocytes, %	Galactose metabolism	gga00052	0.041
Lymphocytes, %	Glutathione metabolism	gga00480	0.041
Lymphocytes, %	Mucin type O-Glycan biosynthesis	gga00512	0.042
Lymphocytes, %	GnRH signaling pathway	gga04912	0.046
Lymphocytes, %	Salmonella infection	gga05132	0.047
Lymphocytes, %	ABC transporters	gga02010	0.048
Lymphocytes, N	Regulation of autophagy	gga04140	0.005
Lymphocytes, N	Nicotinate and nicotinamide metabolism	gga00760	0.01
Lymphocytes, N	Mucin type O-Glycan biosynthesis	gga00512	0.011
Lymphocytes, N	Glycosphingolipid biosynthesis - ganglio series	gga00604	0.018
Lymphocytes, N	ECM-receptor interaction	gga04512	0.043
Lymphocytes, N	Ascorbate and aldarate metabolism	gga00053	0.046
Lymphocytes, N	Degradation of aromatic compounds	gga01220	0.046
Lymphocytes, N	Glycosphingolipid biosynthesis - globo series	gga00603	0.049
Heterophiles, N	Proteasome	gga03050	0.002
Heterophiles, N	Other types of O-glycan biosynthesis	gga00514	0.003
Heterophiles, N	ECM-receptor interaction	gga04512	0.011
Heterophiles, N	2-Oxocarboxylic acid metabolism	gga01210	0.012
Heterophiles, N	Nitrogen metabolism	gga00910	0.014
Heterophiles, N	Glycosaminoglycan biosynthesis - heparan sulfate / heparin	gga00534	0.015
Heterophiles, N	Phenylalanine, tyrosine and tryptophan biosynthesis	gga00400	0.017
Heterophiles, N	RNA degradation	gga03018	0.021
Heterophiles, N	Basal transcription factors	gga03022	0.041
Heterophiles, N	Melanogenesis	gga04916	0.045
Heterophiles, %	Ether lipid metabolism	gga00565	0.006
Heterophiles, %	Peroxisome	gga04146	0.007
Heterophiles, %	Phagosome	gga04145	0.011
Heterophiles, %	Metabolic pathways	gga01100	0.012
Heterophiles, %	Lysosome	gga04142	0.016
Heterophiles, %	Nicotinate and nicotinamide metabolism	gga00760	0.017
Heterophiles, %	Gap junction	gga04540	0.023
Heterophiles, %	Pentose phosphate pathway	gga00030	0.025
Heterophiles, %	Nucleotide excision repair	gga03420	0.026
Heterophiles, %	Glycerolipid metabolism	gga00561	0.028
Heterophiles, %	Glycosylphosphatidylinositol(GPI)-anchor biosynthesis	gga00563	0.028
Heterophiles, %	Galactose metabolism	gga00052	0.031
Heterophiles, %	Salmonella infection	gga05132	0.036
Heterophiles, %	Glutathione metabolism	gga00480	0.039
Heterophiles, %	Glycosaminoglycan degradation	gga00531	0.039
Heterophiles, %	Mismatch repair	gga03430	0.039
Heterophiles, %	Terpenoid backbone biosynthesis	gga00900	0.01
Thrombocytes	Influenza A	gga05164	0.002
Thrombocytes	VEGF signaling pathway	gga04370	0.003
Thrombocytes	Adrenergic signaling in cardiomyocytes	gga04261	0.005
Thrombocytes	Progesterone-mediated oocyte maturation	gga04914	0.009
Thrombocytes	Insulin signaling pathway	gga04910	0.01
Thrombocytes	Pentose and glucuronate interconversions	gga00040	0.012
Thrombocytes	2-Oxocarboxylic acid metabolism	gga01210	0.013
Thrombocytes	Fructose and mannose metabolism	gga00051	0.019
Thrombocytes	Peroxisome	gga04146	0.021
Thrombocytes	Pantothenate and CoA biosynthesis	gga00770	0.025
Thrombocytes	Fanconi anemia pathway	gga03460	0.033
Thrombocytes	Glycosaminoglycan biosynthesis - keratan sulfate	gga00533	0.044
Thrombocytes	Purine metabolism	gga00230	0.047
Lesion score and oocyst count
Duodenum lesion score	Vascular smooth muscle contraction	gga04270	0.014
Duodenum lesion score	Regulation of autophagy	gga04140	0.023
Duodenum lesion score	Other types of O-glycan biosynthesis	gga00514	0.025
Duodenum lesion score	Terpenoid backbone biosynthesis	gga00900	0.032
Duodenum lesion score	Porphyrin and chlorophyll metabolism	gga00860	0.044
Jejunum lesion score	Spliceosome	gga03040	0.021
Jejunum lesion score	2-Oxocarboxylic acid metabolism	gga01210	0.03
Jejunum lesion score	Vascular smooth muscle contraction	gga04270	0.04
Jejunum lesion score	Porphyrin and chlorophyll metabolism	gga00860	0.049
Oocyst count, OPG	Drug metabolism - cytochrome P450	gga00982	0.029
Oocyst count, OPG	Metabolism of xenobiotics by cytochrome P450	gga00980	0.033
Oocyst count, OPG	Steroid hormone biosynthesis	gga00140	0.042
